# Supplementary material
Source: publisher site journal article supplement (https://www.dovepress.com/get_supplementary_file.php?f=457600.xlsx)
Supplement: Supplementary file 1 [file get_supplementary_file.php]

## Sheet: Table S1
Table S1: Differential genes in the TCGA database.
ID	TCGA-06-0680-11A-32R-A36H-07	TCGA-06-AABW-11A-31R-A36H-07	TCGA-06-0675-11A-32R-A36H-07	TCGA-06-0678-11A-32R-A36H-07	TCGA-06-0681-11A-41R-A36H-07	TCGA-06-2563-01A-01R-1849-01	TCGA-06-0139-01A-01R-1849-01	TCGA-28-5209-01A-01R-1850-01	TCGA-28-5213-01A-01R-1850-01	TCGA-14-1402-02A-01R-2005-01	TCGA-06-5858-01A-01R-1849-01	TCGA-41-2572-01A-01R-1850-01	TCGA-27-2519-01A-01R-1850-01	TCGA-19-2624-01A-01R-1850-01	TCGA-27-1830-01A-01R-1850-01	TCGA-06-0878-01A-01R-1849-01	TCGA-06-0211-01B-01R-1849-01	TCGA-26-5134-01A-01R-1850-01	TCGA-26-1442-01A-01R-1850-01	TCGA-06-0156-01A-03R-1849-01	TCGA-12-3652-01A-01R-1849-01	TCGA-06-2565-01A-01R-1849-01	TCGA-06-2559-01A-01R-1849-01	TCGA-06-2570-01A-01R-1849-01	TCGA-16-0846-01A-01R-1850-01	TCGA-06-0238-01A-02R-1849-01	TCGA-14-0781-01B-01R-1849-01	TCGA-06-0171-02A-11R-2005-01	TCGA-32-1982-01A-01R-1850-01	TCGA-28-2509-01A-01R-1850-01	TCGA-06-0125-01A-01R-1849-01	TCGA-06-0158-01A-01R-1849-01	TCGA-14-0789-01A-01R-1849-01	TCGA-14-1034-02B-01R-2005-01	TCGA-06-0174-01A-01R-1849-01	TCGA-32-5222-01A-01R-1850-01	TCGA-02-0047-01A-01R-1849-01	TCGA-14-0736-02A-01R-2005-01	TCGA-06-5859-01A-01R-1849-01	TCGA-27-2521-01A-01R-1850-01	TCGA-06-0743-01A-01R-1849-01	TCGA-14-1823-01A-01R-1849-01	TCGA-06-0749-01A-01R-1849-01	TCGA-19-2620-01A-01R-1850-01	TCGA-32-2616-01A-01R-1850-01	TCGA-08-0386-01A-01R-1849-01	TCGA-06-0211-01A-01R-1849-01	TCGA-06-2562-01A-01R-1849-01	TCGA-12-1597-01B-01R-1849-01
NEXN	0.286069	0.260495	0.316079	0.233756	0.209097	1.43698	1.28017	4.15503	1.30759	0.997649	2.44829	2.46334	1.2967	1.09476	1.69059	1.74163	1.3505	0.749197	4.99254	1.042	0.668932	0.735633	2.84065	0.877603	1.57961	0.610376	3.76455	3.17827	1.02631	0.595778	2.08372	1.08316	1.88042	2.03041	0.916282	1.1581	1.19396	0.580593	2.46261	1.04467	1.52204	0.582333	0.635623	1.53414	2.27556	2.15697	1.76038	2.63845	0.469813
AL583722.1	1.04965	1.19521	0.22886	0.622256	0.984863	0.0998736	0.0571701	0.0143901	0.0349449	0.103233	0.0885567	0.018704	0	0.0688086	0.151441	0.101334	0.0698724	0.206173	0.110932	0.0355436	0.0184583	0.0304483	0.089937	0.0661914	0.281245	0.0673703	0.194179	0.280915	0.149285	0.0493193	0.0140321	0.112253	0.0583738	0.023763	0.0647894	0.214399	0.0946804	0.542616	0	0.0150239	0	0.0205881	0.398275	0.154661	0.0366035	0.0477445	0.107239	0.242027	0.726635
CRYBG1	0.370424	0.109548	0.34547	0.347798	0.233991	0.374866	4.89808	0.415657	1.18046	0.347044	0.479314	0.308285	1.47233	0.460388	4.43202	0.99221	0.497152	0.897217	0.450315	1.4269	0.695828	4.35773	0.745589	0.540094	1.0126	0.417781	1.99426	5.96875	1.90023	0.713632	1.46097	0.666343	3.81679	0.286965	0.428209	0.697428	1.87885	0.633833	0.808953	0.127492	1.21084	0.782833	0.249148	0.845518	0.485834	0.42074	1.33004	0.530736	0.131756
ENTPD3	8.45459	1.04293	7.58913	3.21448	7.27934	0.452572	0.310876	0.122964	1.76448	0.51324	0.366894	0.19615	1.43327	0.475722	0.0718926	0.301753	0.168263	0.960956	0.624762	0.0897357	0.207913	0.201049	0.293432	0.424205	3.52976	1.14482	0.507836	1.4839	0.927739	0.466132	0.234359	0.419652	0.370325	0.729152	0.245357	0.0999295	0.463363	2.08539	0.0320897	0.0233417	0.517592	0.0799662	1.26334	1.43171	3.33155	0.618148	0.0416529	1.12807	0.235194
HJURP	0.0314161	0.0504038	0.0733906	0.111745	0.0297247	3.83189	1.11466	7.27999	1.61367	3.90547	6.38644	3.34606	2.39707	14.8609	3.07355	3.9168	5.91773	10.0143	0.270358	5.56226	5.75819	2.81727	9.32136	4.64145	2.94618	4.95456	1.78007	0.273854	2.51915	4.61113	6.36932	3.87329	0.658917	3.32447	7.36876	2.72812	2.38362	0.429823	5.32702	2.97036	2.36352	1.50705	0.630077	1.13741	5.43806	4.68165	4.94159	4.40323	6.51064
FAM163B	92.1568	22.1742	98.5877	104.997	74.9631	3.84304	0.220906	0.250216	0.405081	1.47591	0.0998035	0.614313	0.457844	5.26436	0.195056	0.326296	6.00722	3.45216	10.0329	0.841211	0.552754	0.220599	3.0929	2.39779	7.50524	5.75956	0.112546	0.14925	2.78805	0.0158808	1.70794	4.41879	0.112778	3.67281	4.72529	0.455641	6.21938	11.8352	0.133015	0.217696	0.39731	0.377874	17.0566	2.56475	0.0471454	17.8182	0.0295981	2.99554	2.47625
CTXN3	1.17312	0.17282	1.20785	0.705107	0.800351	0.0310059	0	0.00893486	0.0433947	0.384587	0.00916418	0	0.115611	0.136715	0.146269	0.0209728	0.121475	0	0.180804	0.0110346	0	0.00945272	0.0223368	0.0308238	0.0545705	0.198694	0.00803776	0.0436052	0.185383	0.0408299	0.0174252	0	0	0.236072	0.010057	0.0266241	0.0587873	0.851145	0.00854962	0.0373135	0.0102149	0	0.370935	0.0480147	0.00757573	0.306328	0	0.0375687	0.125325
HSPA12A	39.8604	14.4224	39.0343	35.6943	31.1411	2.71867	1.60417	0.899459	0.466602	1.86187	1.68229	1.87852	0.995795	4.64445	5.2002	1.34653	3.01797	3.97645	4.34706	2.03939	1.04659	1.20496	3.15363	3.65377	3.18047	5.82435	1.99156	1.85372	2.37851	0.986215	1.33871	2.07994	1.4045	2.15669	3.99326	0.569787	5.77145	2.98433	3.45603	4.49185	0.681303	0.868534	4.40596	2.07509	6.08457	2.99352	1.97741	4.26791	4.13251
SORCS2	10.5547	14.431	9.88467	10.1387	9.55922	2.77243	2.09366	1.46188	0.621794	1.08932	1.31006	3.11913	0.984131	2.17821	2.14112	4.82921	1.37339	1.32238	2.47308	1.24651	1.17627	0.469337	1.89803	0.575196	2.21123	1.12558	5.02201	5.10601	1.73998	1.78915	2.71166	2.58672	0.523365	2.75822	1.85325	1.78029	1.32817	0.779969	1.86038	0.826854	0.561643	0.613399	2.63006	7.63192	5.2256	5.71302	1.20766	2.67905	4.101
ATP5MFP5	0.0664678	0	0.217384	0	0.0733707	1.51785	3.18579	0.58319	2.47838	0.732156	0.747697	0.568513	0.771757	0.418293	0.34097	1.88227	0.778725	0.6963	0.913198	1.08036	1.58963	0.462744	0.546733	0.251489	0.534284	0.938549	1.37717	0.0711543	2.77295	0.749538	0.497597	0.497578	0.394287	0.722284	0.492324	2.17224	1.05521	0.868052	0.906824	0.761094	0.500057	0.938673	1.34508	0.522331	0.679907	0.806228	0.543263	0.68967	0.920263
E2F7	0.0380901	0.0203705	0.0237284	0.0741934	0.0750819	2.63016	0.53347	2.23797	0.297095	0.860546	4.39494	1.0627	0.716045	1.90053	0.729248	1.92617	1.87776	2.16612	0.0402552	2.95552	1.15209	2.2414	2.73774	1.1804	0.397301	0.611188	0.539555	0.439795	0.815172	3.64419	1.78948	1.24532	0.500319	3.59217	1.10502	4.0605	0.887415	0.349397	1.74744	1.03119	1.01662	0.456802	0.178939	0.63607	2.03416	1.80187	1.32471	1.47424	0.887315
SDHCP2	0	0	0	0	0	0.0868495	0.447433	0.0375407	0	0.0538627	0.0385042	0.390356	0.0883181	0.0718027	0.0438974	0.0881194	0.0729128	0	0.253222	0.0927255	0.337077	0.0397165	0.140776	0.172679	0.229283	0.263632	0.135086	0.219854	0.259634	0.300214	0.183034	0.0732109	0.101523	0.433947	0.169021	0.447456	0.197601	0.372517	0.17961	0.117582	0.085838	0.0537098	0.0865845	0.0672462	0.190981	0.24911	0.239798	0.0394622	0.315939
HID1	16.5675	27.6642	15.8045	15.1179	18.5417	2.89328	1.23008	1.60274	1.62907	0.75346	1.72171	2.70264	2.51016	5.13819	5.8318	1.97368	2.37888	5.1174	4.66249	4.38613	1.08244	4.1042	1.95407	3.88858	9.06954	5.91543	2.58052	3.48431	3.20153	0.593001	2.98069	4.54931	1.39143	1.64414	4.41439	1.58893	4.23409	2.40367	2.99465	5.13724	3.83476	0.994524	7.31615	5.33956	3.36646	3.3034	2.12964	5.12451	6.70592
RPL39P29	0	0	0	0	0	0.277144	2.85559	0.239591	1.16364	0.17188	0.24574	0.155707	0	0	0.28016	0.562392	0.232671	5.14907	0	0.739737	0.153663	0.253478	0.149742	0	0	0.420635	0.862139	0.233857	1.65703	0.410575	0.23363	0.233622	0.485953	0.593469	0.404521	1.18989	0.47292	0.237747	0.343891	0.125072	0.410874	0.856962	0.414447	0.858352	0.101573	0.264977	0.255072	0.377781	0
TBX5-AS1	0.00409962	0	0.0134079	0.00486068	0	0.005201	0.142905	0.0179851	0.0327561	0.0516093	0.013835	0.0175324	0.0105779	5.6458	0.935855	0	0.0043664	0.407992	0.129979	0.660794	0.0403718	0.137949	0.753114	0.542898	2.7022	0.542042	0.0566275	0.0219433	0.0932896	0.00513669	0.00876882	0.0087685	0.0243189	0	0.339083	0.410872	0.289917	0.0356933	0.32268	1.73689	0.0565448	0.0707614	5.72439	0.00805411	0.102932	0.193934	0	0.0189056	0.0882937
MAP7D2	31.6796	5.96596	29.4011	25.3641	25.9937	1.09376	0.136602	0.18911	0.375737	1.23333	0.983044	0.413393	0.500513	4.10206	0.427187	0.403545	1.06015	0.143683	3.29254	0.456487	0.567843	0.377407	0.78974	1.31468	1.52776	1.55441	0.170123	0.57473	1.29304	0.657958	0.536453	0.808841	0.668333	1.41948	0.420883	0.192106	2.18877	3.17307	0.0904783	0.821168	0.17198	0.387396	3.91559	1.03165	0.0801719	1.46403	0.0869377	0.966841	0.554625
PSD	68.8978	17.3881	82.6735	75.6411	74.8943	3.12366	1.63873	0.554919	0.994456	4.18956	0.885699	3.89949	2.99148	8.06246	1.07222	1.01001	3.40049	5.18698	7.20306	3.91405	2.86623	2.48332	3.509	8.34683	8.203	9.65554	2.51203	4.06084	4.96664	4.68858	1.56258	3.01508	0.862698	3.1509	4.46913	3.425	8.0793	22.0848	0.755316	4.79287	1.72684	0.602875	18.5	3.98139	2.5035	4.23365	1.22578	5.84257	8.52446
AL606748.1	0.0261812	0.0980117	0.028542	0	0.0578005	0.033215	0.114078	0.114857	0	0.205994	0.412318	0.709122	0.236436	0.0823813	0.268612	0.0674012	0.0836549	0	0.193686	0	0.847139	0.243029	0.0717848	0.13208	0.1403	0.033608	0.309975	0.0280272	1.29084	0.295238	0.168	0.0559979	0.232961	0.474171	0.064641	0.057042	0.188927	0.227946	0.109905	0.539621	0.131313	0.287573	0.132454	0.102871	0.121732	0.158784	0.122279	0.15092	0.0805523
AC026401.3	0.563846	8.10356	0.44512	0.991253	1.48089	15.6385	4.74421	13.7327	4.71229	11.2591	7.9612	8.509	6.52172	21.9632	8.40306	12.7138	14.1851	18.433	2.15756	9.79673	9.35461	9.13683	15.5131	5.78709	5.83472	11.2562	4.81496	2.31034	6.71031	9.86637	12.289	6.61214	4.32509	15.353	6.76862	10.1879	3.25503	2.66616	6.42749	4.83113	9.58102	7.13902	4.59855	5.50046	12.9817	5.56571	9.42131	7.08332	6.43071
MYL6P5	0.037361	0.0466214	0.0407299	0.0885935	0	0.80577	5.86049	2.17172	7.16438	4.29176	1.97529	3.24882	1.20499	0.626983	0.81454	4.13585	1.5519	0.587076	1.26351	1.31573	2.68056	0.736962	1.63901	1.4136	0.500527	1.39081	2.6909	1.03988	3.5424	2.66829	1.43843	1.19865	1.55138	1.89462	1.66039	5.29099	1.94113	2.76491	1.56836	1.41176	1.68647	2.8726	1.70113	1.32119	1.28548	0.996982	1.26508	1.50756	2.98868
MAGEA12	0.079433	0.0770944	0.038487	0.062786	0.0779399	0.425486	1.46135	0.50335	0.634673	0.166661	0.436843	0.943621	0.352977	0.194399	0.418799	0.408986	0.40421	0.369831	0.149241	0.442319	0.484239	0.583729	0.181494	0.589957	0.0709445	0.373874	0.896915	0.283445	1.84102	0.143761	0.37756	0.311476	0.248687	0.0639387	0.370447	0.480733	0.216542	0.365002	0.138937	0.202123	0.331998	0.263131	0.0558142	0.208072	0.196977	0.342574	0.731674	0.518938	0.62456
RPL7P23	0.160697	0.372409	0.225242	0.108874	0.202727	1.36884	5.30151	2.44225	3.91308	2.34811	2.06593	1.34175	1.33275	1.15576	1.76647	3.30961	1.32034	1.20244	3.17828	1.21269	1.48561	1.22531	1.54212	1.88196	1.1687	2.23963	2.17439	0.810987	3.56971	1.26562	1.25213	1.57124	2.45123	1.66309	1.53036	2.77593	1.02709	1.2492	2.07194	1.52463	0.777196	3.31405	1.36466	2.07464	1.0247	1.03029	1.1526	1.24393	2.15426
GRIA2	50.886	11.201	48.2859	28.2777	37.5078	11.9936	1.93886	9.31244	1.99222	2.5292	4.00008	6.23114	3.95411	35.1926	8.02615	4.3896	11.3008	35.252	13.1492	10.0305	4.56814	12.6696	18.9344	24.9952	8.23792	13.3763	2.99559	2.33245	6.32126	0.756999	10.8264	6.00371	5.37586	2.22316	15.807	3.72121	17.5635	2.46726	1.96052	5.30821	5.82473	0.334063	4.5533	6.02891	2.04932	1.67736	9.47297	3.12225	8.2763
CACNG2	5.02121	0.716847	4.9579	3.38029	3.86931	0.215938	0.0231766	0.0291686	0	0.192512	0.0179503	0.0227476	0.0960706	0.569054	0.013643	0.0684674	0.186952	0.0557212	1.21423	0.115274	0.0299318	0	0.517735	0.0939183	0.484567	0.614513	0	0.0683293	0.0806928	0.0199939	0.0455087	0.113767	0.0709937	0.125235	1.94364	0.0173833	0.261005	0.266285	0.0111644	0.0243626	0.0333474	0.0584244	0.592019	0.073149	0.0148389	0.219362	0.00621065	0.214631	1.58743
APOL4	0.0979478	0.229784	0.307526	1.30067	0.229214	12.5654	3.41427	7.91934	8.62954	17.8915	2.11989	26.9314	16.22	6.16812	15.0788	0.9582	15.014	12.5181	1.06414	0.238805	18.6684	9.61031	8.44882	15.1302	39.1459	13.7954	8.24907	1.48473	15.9587	3.67685	3.00848	10.3868	2.73664	0.730865	23.4673	14.9809	7.67307	0.400807	25.6776	6.8729	5.80178	5.47148	4.25166	3.7639	1.58485	6.83851	12.0999	1.89711	8.82979
ANO3	6.43633	0.736467	7.52415	5.44217	6.0452	0.231685	0.0873366	0.0806052	0.0177946	0.0876143	0.0626318	0.146041	0.209744	0.266295	0.685483	0.0516013	0.196879	0.769908	0.244785	0.39819	0.0375975	0.103366	0.131287	0.561767	0.325219	0.943424	0.0505387	0.569807	0.270289	0.00558098	0.116709	0.128613	0.0495419	0.133107	0.926528	0.0921933	0.257137	0.591403	0.0420708	0.953759	0.0335103	0.0349462	0.371818	0.0962581	0.0144972	0.221514	0.057209	0.123245	0.0959305
TNFAIP6	0.879699	1.82957	0.390713	4.21066	1.35469	6.93044	13.676	21.9644	9.57425	19.3972	1.93028	16.1787	6.15092	14.9679	5.45984	39.3668	8.10862	8.19155	0.516502	9.63532	77.463	22.8216	49.9373	2.38333	13.1094	8.81087	8.33652	6.63857	10.9564	0.775646	13.1597	3.63534	23.9176	9.5594	11.1682	26.0284	5.89347	11.6777	7.08937	3.24576	11.3436	7.92432	1.68955	4.52334	1.24222	1.67301	20.5431	16.3649	5.73062
RPS26P11	0	0.122984	0.107443	0.0584259	0	0.437617	1.71773	0.324274	1.83742	0.697893	0.332596	0.702473	0.381443	0.361799	0.315985	1.14175	0.524846	0.774333	0.416632	1.20143	0.693249	0.171534	0.472893	0.497196	0.792214	1.39164	0.63205	0.211009	0.373784	0.617436	0.47431	0.421594	0.876949	0.178495	0.608332	1.7715	0.711191	1.28711	0.413723	0.169278	0.803252	2.24238	1.05954	0.387245	0.504069	0.119544	0.747991	0.227248	0.682264
RSL24D1P1	0	0	0	0	0	0.176518	0.454693	0.305199	0.833786	0.930524	0.234774	0.198345	0.0897513	0.0729679	0.0892194	0.179099	0.148192	0.364392	0.110285	0.18846	0.489352	0.201805	0.333807	0.175481	0.0932016	0.26791	0.137278	0.111711	0.263847	0.130751	0.186004	0.185997	0.154756	0.629984	0.128823	0.568396	0.100404	0.227137	0.14602	0.0796601	0.087231	0.436651	0.0879895	0	0.129387	0.0843841	0.324919	0.080205	0.214044
AC139491.1	3.46141	0.324658	2.05941	1.77035	2.44737	0.172209	0	0	0.0301273	0.178003	0.0127247	0.0483761	0	0.272883	0.014507	0	0.120479	0.118499	0.29887	0.0459652	0.0159136	0	0.077538	0.142665	0.515252	0.464659	0	0.0121094	0.128704	0	0.0241952	0.145166	0	0.102435	0.041893	0.0246455	0.163255	0.615538	0	0	0.0283673	0	1.18748	0.133339	0	0.137208	0.0132079	0.182578	0.121812
OLFML2B	1.68725	1.89867	3.02734	3.75684	2.05094	4.89267	51.6376	9.61598	21.907	2.90792	11.3653	5.26145	14.4922	3.33924	26.5714	7.54973	4.95793	5.20787	4.79755	19.412	1.75198	5.08666	11.7995	7.2009	5.5905	8.07689	18.3761	62.1209	11.0841	6.86444	8.72157	15.0527	12.995	2.91029	8.87092	4.33799	21.7926	5.92411	9.05908	6.83099	7.24723	6.53214	1.3274	3.22598	5.50554	25.5699	13.6966	11.9144	5.41523
NALCN	11.9951	11.6834	10.5203	9.44263	9.93537	1.25659	0.642782	0.884607	0.724562	0.729574	0.939638	0.636346	0.595666	1.6799	2.05405	0.794079	0.59379	3.14093	7.66568	1.26895	0.129371	1.72949	1.63366	3.85395	1.0626	2.12484	0.589753	1.84788	1.38782	0.316864	3.10004	0.75398	0.931912	0.461484	1.99614	1.18128	4.00095	1.28855	1.94627	3.27746	1.80889	2.19153	2.49098	1.5206	0.242295	0.436882	0.22146	1.83106	1.87445
EDA2R	0.301863	1.33334	0.104471	0.261325	0.142805	12.3945	3.63272	3.96232	2.46294	3.40048	0.458145	3.94115	0.290532	6.77449	1.54237	5.46451	1.10741	5.39588	0.19749	0.629531	1.69192	11.9922	0.715993	0.997102	1.11052	0.467451	4.94962	5.52427	3.68896	0.840499	4.83737	2.03429	1.86171	0.37315	1.58523	4.69772	3.14641	1.37666	5.85316	0.120703	1.60412	9.13494	1.60595	1.68499	0.204962	0.796226	0.956679	6.16483	2.3661
GRIN1	126.636	21.3261	132.049	103.184	141.532	3.47562	0.233192	0.131367	0.305436	1.58406	0.0888703	0.588537	0.0493172	3.43212	0.0784399	0.23619	2.27731	0.533944	6.70911	0.638599	0.172091	0.124196	1.25775	2.00885	7.61709	5.07066	0.0603459	1.61234	3.46021	0.0798289	0.714085	2.55099	0.0302351	2.15086	1.06023	0.183231	4.71155	4.56524	0.120354	0.102135	0.444173	0.215941	13.0607	1.62719	0.0687265	3.84854	0.0357078	2.74126	1.17614
CDC42P6	0.387037	0.482968	0.551763	0.529485	0.295776	4.07921	7.52402	6.23664	11.1804	6.9337	6.79859	4.11679	2.65023	2.46691	2.9018	5.59512	5.51745	3.11884	3.80719	7.17802	5.1517	3.41997	4.5713	2.59086	1.87463	4.43322	5.02297	3.60144	7.90397	7.27416	3.50243	3.08839	4.10613	4.85284	3.93261	13.3623	4.68349	5.70262	3.71812	3.71588	2.20251	7.24103	2.07104	3.86035	3.93136	4.22514	3.99767	2.53997	6.09142
FOLR1	0.391473	0.122126	0.438628	0.103144	0.264079	0.662193	1.94266	0.572466	5.21314	5.71532	1.14985	1.48816	5.66771	0.30795	4.83921	2.46354	0.868642	2.22136	0.91939	8.48394	2.57008	1.82956	0.342878	0.384011	1.8356	1.34006	5.17133	0.954559	0.90732	2.99752	0.558224	0.697755	4.70894	1.18167	0.389301	2.21522	2.43257	11.4559	25.6887	1.23271	2.08616	5.54553	3.68596	2.43545	2.71007	2.67758	1.32049	1.0907	0.836426
TYMP	0.711755	1.82107	3.70105	4.31657	2.1931	6.32081	49.2862	5.58789	25.2026	7.38084	11.5663	9.27038	24.7727	3.41041	12.6676	14.0524	5.661	11.5866	2.18088	15.7094	8.0825	8.74584	6.73907	12.5286	16.1073	13.1922	13.2315	27.682	9.37998	6.56985	4.73696	23.5416	15.7571	3.66318	6.92811	8.23337	11.4177	11.8142	9.56542	4.23331	13.7849	8.32407	15.6081	5.00979	12.1566	5.47811	17.6196	13.1174	5.41167
JPH3	38.2432	7.69017	42.7963	37.9608	41.224	0.952113	0.22639	0.0886418	0.384387	0.567775	0.12014	0.168707	0.510174	6.13681	0.78849	0.193207	0.851592	5.68479	4.80466	1.61472	0.142127	1.02822	2.99558	6.63294	4.07201	4.54271	0.113917	1.15876	1.93769	0.0868006	0.429096	2.94182	0.0984557	1.06124	8.02825	0.210679	2.05794	1.80317	0.345338	3.50352	0.137535	0.0996448	5.52001	1.34966	0.209369	1.00485	0.141554	1.28121	3.66784
RPL12P32	0	0	0.0378442	0	0.0383191	0.396361	0.453773	0.228436	0.0924553	0.437007	0.195249	0.296916	0.313494	0.18205	0.267116	0.44684	0.221838	0	0.110062	0	0.244181	0.0402793	0	0.131344	0.232532	0.35649	0.0684999	0.148646	0.526627	0.0434955	0.222753	0.408365	0.102962	0	0.171416	0.605061	0.1002	0.226678	0.255018	0.0397494	0.217636	0.381296	0.0878114	0.204597	0.225968	0.336853	0.121598	0.0400213	0.373818
CD276	3.35114	2.63725	2.9348	4.20439	4.73071	35.6957	23.042	41.8409	17.2901	16.2583	32.26	29.0644	13.7285	21.7059	22.9053	47.613	25.1889	20.2109	11.0206	23.3619	26.467	33.7785	31.4973	18.0611	14.6542	16.3332	39.4289	18.2187	18.1314	39.0926	26.4808	24.2759	31.163	29.8141	28.5997	21.8802	26.0311	14.6961	11.0346	26.2549	19.062	18.0135	14.8484	19.4349	24.2196	17.1562	36.1731	71.4515	18.2981
RN7SL296P	0	0	0	0	0	0.0727619	0.249904	0	0	0.270755	0.129034	0.245278	0.0739923	0.240623	0.0735538	0	0.122172	3.90533	0.0606136	0	0.484115	0	0	0.361673	0.0768368	1.47246	0	0.0613973	1.0876	0.35931	0.122676	0	0.0850553	0.207747	0.141605	0	0	0	0.0601905	0.197019	0.575316	0.0899954	0.14508	0.450707	0.160002	0.0695675	0.066967	0	1.05876
FOXD2	0.0770316	0.0274642	0.0959746	0.0217457	0.0364421	0.125648	0.127865	0.0482769	0.107466	0.202028	0.243453	0.345121	0.0804498	0.230844	0.239919	0.151094	0.0390688	1.22966	0.0852869	0.258362	0.433477	0.310706	0.145835	0.180426	0.122857	0.155388	0.115812	0.133511	0.236503	0.091922	0.137305	0.141223	0.108798	0.391964	0.199246	0.0399599	0.539988	0.159684	0.531247	0.176411	0.0459945	0.201455	0.08351	0.0864778	0.385455	0.0800882	0.0728114	0.215679	0.163646
MIR320E	0	0.191064	0	0	0.338029	0.582744	0.667154	0.167928	0	0.240939	0.172237	1.74615	0.395066	1.76654	1.96362	0.394177	0.489232	0.801988	0.809084	0.829562	0.215402	1.95427	0.629719	0.77243	1.23076	0.393093	1.51067	0.819545	0.5807	0.191846	0.655	1.14621	0.227067	1.38653	0.378035	0	0.441955	0.33327	0.160687	0	5.18362	0.240256	0.774622	0	0.284766	0	0.715112	1.23566	0.471087
CLEC12A	0.0369357	0.00658437	0.0287616	0.0125121	0.0349471	0.455198	1.49443	0.109954	2.09393	1.46965	0.184003	0.0150437	0.918984	0.049809	0.162407	0.298847	0.51703	0.331653	0.061341	0.800463	0.326616	0.189796	1.27313	0.0332739	0.127242	2.09972	0.265506	1.44038	0.620366	0.363622	0.0620738	0.129786	0.633832	0.152902	0.182387	0.344885	0.395991	1.99839	1.78308	0.0302096	0.734391	1.74699	1.06111	0.0207325	0.137389	0.0448014	0.443589	0.24333	0.129875
RAPGEFL1	22.8719	4.99852	22.8459	15.4227	22.9403	2.67043	1.09903	1.99902	0.903702	1.15766	2.19895	2.73953	1.54955	7.93664	2.81502	1.0977	2.39222	4.51394	5.71535	3.02192	0.912452	2.66886	4.03009	5.91164	4.5176	3.41512	2.38194	0.983626	2.9154	1.66672	2.72322	3.51308	1.11327	4.41591	2.06473	0.700016	2.84721	2.26794	1.51261	1.55756	4.83814	0.90465	4.49663	2.85521	2.54938	2.85185	1.92483	3.5553	2.71154
SIGLEC12	0.00779132	0	0.0169878	0.0369509	0.0258014	0.00988451	0.916617	0.179448	0.311265	0.0490417	0.122703	0.333204	0.12062	0.016344	0.249802	0.0401161	0.0912817	0.0816199	0.0741078	2.42725	0.646696	1.54591	0.0640878	0.196529	0.0208761	0.890131	0.361297	0.558824	0.0886484	0.0585736	0.108324	0.216639	1.16701	0.29633	0.00961833	0.0254629	0.0787125	0	0.057237	0.303331	0.048847	0.0611281	0.00985434	0.0153068	0	0.179561	1.61932	0.233546	0.34759
WNK2	13.4859	3.70652	13.6707	10.4403	10.1504	0.27034	0.124554	0.229434	0.397968	0.188107	2.08282	0.0907605	2.67871	3.22717	0.834845	2.26794	0.247717	4.80488	5.13713	3.30341	0.0420425	0.064829	0.199505	0.406407	4.85839	2.40181	0.0282034	0.414504	0.394232	0.0260485	0.569738	0.818447	0.0790038	0.329455	1.86067	0.0962514	2.26342	0.446852	1.52588	2.44597	0.449664	0.167185	2.02301	0.234847	1.12854	1.2766	0.068271	0.444904	0.289834
DRD5	2.52447	1.02863	2.38302	2.64406	2.4048	0.0653608	0	0	0.0392042	0.0115816	0	0.0104919	0.0284854	0.0154391	0.0188778	0	0.0235167	0	0.108896	0.00996898	0.0103541	0.00853991	0.0504496	0.102107	0.059161	0.151164	0	0.0393944	0.0279135	0.00922178	0.0157425	0.0314838	0.0218296	0.0533188	0.045429	0.00801771	0.0849767	0.544675	0	0	0.018457	0	0.409585	0.0144594	0.00684417	0.00892733	0	0.0763669	0
GAPLINC	0.0163165	0.0203608	0	0.232147	0	0.227701	5.90092	0.196848	1.82518	1.5919	0.2019	0.325637	0.610454	0.188251	0.230179	0.588078	0.10427	0.170928	0.034488	0.72932	0.252498	0.757297	0.268425	0.226364	0.109297	1.73844	0.595643	0.92575	1.11388	0.388438	0.1745	0.139595	0.556542	0.384164	0.181284	0.622116	0.282582	0.56824	0.0684946	0.1121	0.225049	0.486455	0.701656	0.0961665	0.379327	0.059374	0.476288	0.658391	0.175705
HAR1B	0.91868	0.31048	1.58574	0.794227	1.39437	0.121405	0.250183	0	0.0509742	0.331292	0.0215297	0.0545671	0.271608	0.100372	0.171817	0	0.0815386	0.200497	0.14159	0.129619	0	0.155453	0.0262383	0.0965538	0.179486	0.221115	0.0377667	0.14342	0.217762	0	0.0614062	0.040936	0.0567668	0.277305	0.0945086	0	0.0828665	0.249952	0.0401718	0.0876617	0.0479965	0.0300319	0.31469	0	0.0355958	0.13929	0.0223472	0.242719	0.412201
CBX3P1	0	0	0	0	0	0.117811	0.269752	0.373442	0.329768	0.243549	0.348206	0.176506	0.119803	0.0974002	0.35728	0.478135	0.329687	0.162135	0.294425	0.335419	0.0870941	0.179585	0.254616	0.0780796	0.0829393	0.15894	0.183244	0.132547	0.352193	0.193924	0.264838	0	0.275432	0.224247	0.26749	0.505811	0.0893482	0.269504	0.324855	0.141778	0.232878	0.194286	0.0783011	0.182439	0.143925	0.187732	0.144571	0.214121	0.0476189
HOXD13	0	0	0	0.00907688	0	0.0679869	0.366935	0.848034	0.774809	0.0602348	0.0602831	3.72148	0.138273	6.87344	2.29744	5.73527	0.163077	8.22038	0.145635	7.0098	6.10665	0.177661	9.51926	0.366904	2.22562	4.18644	3.7389	0.0245863	0.40649	0.1247	6.8775	2.30879	1.18075	0.110922	11.9553	10.258	3.23732	4.36584	6.09004	4.76003	7.34346	0.276294	6.11951	0.0300807	0.59089	0.195006	0.232411	0.0617829	0.105995
MAG	31.4673	768.932	21.2556	103.339	79.7388	8.2182	28.3016	0.368907	5.32877	6.99954	44.3286	7.08498	1.12975	1.04623	9.56458	3.88178	3.36633	33.3228	16.3338	1.72028	0.848497	2.04565	9.23844	19.2802	54.5802	103.217	2.08847	59.6923	8.46797	1.24982	0.483774	35.922	4.48944	2.70985	28.859	19.0919	7.13106	24.7916	1.04074	7.51715	1.57796	0.418599	80.1782	111.302	17.4192	2.56052	0.507858	3.48341	129.665
TROAP	0.0477076	0.0378843	0.0851064	0.0308531	0.0143624	4.78143	1.43622	4.35236	1.23596	3.06433	4.70312	3.14695	2.02549	18.8554	4.12709	2.40055	4.80405	11.7674	0.252097	10.3979	5.07029	4.14667	10.744	6.41621	3.01558	6.35789	1.38642	0.157857	2.91143	3.76045	5.85822	4.75412	0.443798	3.23621	6.75146	3.4112	2.3097	0.632488	4.25118	5.37836	5.88951	2.0076	1.32199	1.06507	4.50095	3.22479	4.0816	1.95505	5.41762
CDC42BPG	0.0757551	0.0245083	0.0489399	0.0266128	0.0433598	0.081869	0.0733521	0.156938	0.127035	0.0220756	0.0252495	0.151988	0.115831	0.323711	0.0467774	0.0866776	0.122521	0.543756	0.106748	0.532049	0.185517	0.0586001	0.11924	0.0636952	0.135319	0.0288131	0.0996566	0.120143	0.0744877	0.446469	0.156034	0.0690125	0.0915402	0.0762227	0.121228	0.0305649	0.0323946	0.0244282	0.18845	0.0353401	0.404578	0.0308181	0.180982	0.0716581	0.281784	0.234824	0.147422	0.106745	0.0776924
SCIMP	0.207838	0.228841	0.413175	0.265749	0.215928	1.26667	7.72428	0.648085	3.8314	0.981163	2.66346	0.801701	1.76653	0.525748	1.86059	2.22418	1.76657	1.60093	0.323018	1.91541	0.407053	1.24835	1.98892	2.20495	2.86085	1.86234	1.48769	7.45568	4.15763	1.43994	0.810656	2.25755	2.59875	0.553556	0.845187	1.71363	2.75843	1.86276	2.52761	0.578634	1.11396	1.91839	3.18022	1.40109	1.21269	0.958967	1.99375	1.97799	1.48581
PWAR5	2.13011	0.457593	1.55204	1.40663	1.84534	0.314707	0.0704918	0.183347	0.0718128	0.110317	0.236583	0.122999	0.0834856	0.51471	0.15215	0.152713	0.292924	6.27064	1.10565	0.292173	0.060692	1.35782	0.916724	0.448884	0.00722459	0.17306	0.234106	0.421421	0.122714	0.114866	0.184553	0.184547	0.423859	0.56647	0.259631	0.187988	0.513668	0.0704269	0.299949	0.166723	0.11495	0.0761565	0.102308	0.455561	0.0952803	0.170068	0.251863	0.298423	0.323539
AC008760.1	0.0749943	0.0311942	0.0545045	0	0.0275942	0.15857	0	0.109667	0.0665786	0.39337	0.0562408	0.356357	0.0967508	0.760366	0.288533	0.128711	0.159749	0.261874	0.132095	0.203158	0.0351677	0.377076	0.205623	0.126111	0.0334901	0.0962678	0.12332	0.0535213	0.189616	0.0626436	0.374286	0.374272	0.148289	0.0452743	0.21602	0.0272322	0.0360779	0	0	0.0858727	0.376136	0.0392254	0	0.491113	0.0929849	0.151608	0.379447	0.23056	0
MTCO1P22	0.0882654	0.125878	0.178703	0.149502	0.0556754	0.335935	1.48344	0.345733	0.638078	0.734156	0.170211	0.575202	0.634429	0.436439	0.695354	1.88277	0.228308	0.528369	1.67909	0.375743	0.159651	0.307248	0.328442	0.620216	0.523676	0.550331	0.870856	0.350958	0.908624	0.363379	0.310162	0.36409	0.635788	0.66227	0.0933968	0.0961536	0.436755	1.37229	0.132331	0.216576	0.537561	0.672715	0.797405	0.64408	0.820797	0.627079	0.147229	0.465189	0.290966
PBX2P1	0.106266	0.0331514	0.0724053	0.0472476	0.0879767	0.235927	0.115757	0.786697	0.495291	0.104513	0.418386	0.321908	0.102821	0.473698	0.340706	0.376163	0.452726	0.139152	0.407111	0.287873	0.149497	0.277431	0.309576	0.418823	0.213548	0.221667	0.602863	0.611453	0.453405	0.266296	0.355151	0.255699	0.354584	0.408977	0.377156	0.332819	0.306732	0.0289127	0.487911	0.212941	0.233179	0.145903	0.0840024	0.49583	0.321162	0.273905	0.294686	0.352225	0.265648
MTCO1P2	0.365904	1.43067	0.797797	0.318143	0.403904	2.19724	8.822	1.57847	2.79365	2.45669	2.35987	3.30352	3.96527	2.55855	3.31609	9.23148	2.00054	6.13298	10.9308	3.40321	0.823615	1.89639	1.77241	3.13807	2.67978	2.72425	5.15045	2.61135	7.30872	1.49765	4.66979	2.32176	2.45995	3.35764	1.59603	0.87693	4.25986	7.53958	1.30561	1.73179	2.63045	4.32528	1.91286	4.31313	3.65214	3.0772	1.36716	2.44671	1.83878
HFE	0.50464	0.558076	0.579793	0.326032	0.45698	2.19666	6.08304	2.58505	5.94754	4.03233	3.39922	2.75691	2.72501	0.380333	2.45309	4.18529	1.92141	0.791389	0.498196	3.03291	2.46564	2.12479	0.770532	0.830822	2.18204	1.30722	3.57471	4.60967	3.01411	2.34367	1.76775	1.10844	3.06075	2.79113	0.615514	2.29771	0.580031	3.65041	4.68079	0.228368	1.56485	5.12093	1.88421	1.59695	2.91119	1.22422	2.01819	3.86701	0.739129
STK33	0.552893	0.346375	0.442836	0.377266	0.558	3.01472	0.80631	2.95273	3.3538	2.35441	2.04863	1.97846	3.36557	2.01429	2.34136	3.17209	3.05012	2.43499	2.93353	2.94359	1.73025	4.12937	0.584722	1.21816	1.35142	1.09501	2.37349	1.19341	1.48067	1.54951	4.31771	3.8035	1.49597	2.09262	0.944415	3.95063	1.54705	2.71633	5.36664	3.57633	5.59986	2.92493	2.39471	2.77982	2.28323	3.08219	2.58227	3.78291	0.55546
SMIM25	0.0699661	0.0261924	0.0915302	0.199091	0.108125	0.204155	12.2859	0.069062	8.03143	0.759681	0.346302	0.319165	1.24564	0.161446	0.843453	2.05339	0.171394	0.513063	0.0591545	4.33092	0.324817	0.194839	0.671427	0.90889	0.49679	1.27535	0.821468	6.41886	0.504174	1.09582	0.291824	0.194542	2.43836	0.570224	0.613246	2.29419	0.575569	0.730991	0.367135	0.200288	0.50883	0.933183	5.92897	0.412366	1.23619	0.441304	2.27109	1.18575	0.172213
ODC1	13.3642	11.6369	14.7205	24.6	16.2701	96.1052	26.5603	84.9396	56.3987	72.2545	93.2292	45.3586	58.0225	68.0981	70.4978	81.1112	109.317	74.025	53.2224	122.994	56.0208	69.7904	107.385	108.949	39.5314	178.494	31.724	16.5022	58.5521	80.8867	58.4865	46.1016	28.1049	47.0791	125.493	87.0555	69.587	47.7394	47.721	198.797	56.4004	62.0584	36.1076	22.0554	80.2343	97.1492	73.6903	47.5212	112.75
AC106881.1	2.28203	5.60532	2.15647	2.24149	2.4053	0.784228	0.471357	0.700564	0.370432	0.121592	0.249172	0.572782	0.053166	0.059433	0.165159	0.371324	0.159109	1.02531	0.272206	0.0837287	0.811657	2.21753	0.127117	0.0844592	0.248444	0.376916	0.0914841	0.380501	0.410275	0.89071	0.225876	0.181796	0.0993121	0.0746367	0.0826702	0.892257	0.178428	0.190612	0.0810917	0.0589853	0.187315	0.0646647	0.495162	0.900703	0.0431127	0.668571	0.0781919	0.605766	0.356606
EPHB4	0.932719	1.18053	0.807649	1.02056	1.13254	12.6478	3.33256	12.6	3.45652	5.73252	11.5204	7.3965	3.57898	2.5743	5.61862	7.04581	10.2435	1.54939	2.47279	4.22322	4.11269	7.13668	4.64345	2.7661	3.33813	1.10494	5.09819	3.99393	5.11413	9.75669	9.88678	5.88511	6.76198	12.9059	3.60234	4.58685	1.74612	1.52553	5.58787	4.95254	7.07057	3.26583	2.50431	3.82714	10.7428	12.3058	10.4612	7.86213	3.62404
HCN4	1.16254	0.0828968	1.22082	1.37555	1.07638	0.0511689	0.0310133	0.0650522	0.0505511	0.0336008	0.120099	0.169107	0.416273	0.746537	0.149092	0.0610789	0.0732809	0.559217	0.0601776	0.192815	0.060079	0.423947	0.341519	0.0538607	0.247923	0.207097	0.0280899	0.111752	0.0539887	0.115936	0.157316	0.728194	0.0105554	0.0558601	1.04854	0.0206766	0.767	0.170416	0.0149394	0.0380336	0.273689	0.0856251	0.210052	0.0745774	0.297846	0.408646	0.0720256	0.0875287	0.759162
LINC01251	0	0.0440313	0	0	0.0389499	0	0	0.0386994	0	0.0555251	0.15877	0	0.091044	0.296075	0.0905045	0	0.0375816	0	0.0745822	0	0	0.122827	0.0483735	0.178009	0.094544	0.226474	0.0696275	0	0	0	0.0377366	0.226411	0.0523282	0.127811	0.0871191	0.192194	0.0509248	0.076803	0.0740616	0	0.221218	0.22147	0.178514	0.207965	0.0328126	0.171199	0	0.0813602	0.108563
AC093157.1	0.803091	0.572655	0.684607	0.894904	0.89316	4.02176	3.34141	1.90728	3.90793	5.48256	2.24831	3.55501	3.62236	3.14765	3.50797	2.84474	3.00338	3.44742	3.22266	5.71697	3.7207	2.07387	2.7483	3.38129	3.29243	5.85211	2.66303	1.09888	2.8168	2.86742	3.08034	2.0212	1.77304	1.48729	2.60897	6.86076	1.3159	3.73262	5.22165	3.67142	4.54277	5.24908	3.34506	1.55403	2.6391	5.20749	2.30548	2.81939	1.80207
WT1	0.00833878	0.00520282	0.0272721	0	0.0138072	0	0.254339	0.00914558	0.0444181	0.446145	0.0140704	0.0118872	0.1022	0.0349848	0.0213884	0.0214674	0.00888142	0.109194	0.0132192	0.180717	0	0.00483783	0.00571591	0.0105169	0.156401	0.155211	0.341434	0.0357069	0.0474386	0	0	0.735713	0.030916	0.0377561	0.0102942	0.00908401	0.0120348	0.099827	0.997643	0.0907095	0.00522792	0.00654233	0.0105468	0.0245735	0.00775439	0.237693	0.0146048	0.0240342	0
MTCO2P12	3.62084	3.60837	5.12606	5.57496	5.05161	15.2801	49.7412	10.3692	21.8319	19.4278	12.389	16.4886	17.2578	11.7361	28.8935	55.3466	11.9176	26.2093	60.2698	23.9089	9.09111	10.6784	8.79022	18.869	18.2581	43.0904	17.9862	13.7549	40.8159	10.0188	17.2912	22.3191	18.6075	15.1648	10.6471	4.27313	25.5478	22.7132	7.20406	13.0428	38.3702	23.9494	27.6365	27.6142	14.9882	20.4347	10.5694	15.3062	9.78646
SRP14P2	0.44223	0.245263	0.21427	0.174775	0.325438	2.24415	5.13843	3.71846	7.45948	3.71143	2.70842	1.61106	1.01427	1.75227	1.38635	3.03595	2.09337	3.08846	3.73894	2.52909	2.14291	1.65341	1.27989	1.92112	1.18492	1.95533	3.19967	1.84104	5.77705	4.6175	0.630602	1.36625	2.47757	1.86883	1.75911	5.62044	1.98563	4.49198	4.69262	1.91298	1.84835	4.78033	3.10737	3.66829	1.37079	2.38403	1.09008	0.736438	3.09919
ANKRD2	2.19825	0.471933	1.79091	1.59743	3.97901	0.16493	0.308978	0.025924	0.0629537	0.334758	1.31617	0.185325	0.0457416	0.0991679	0.212196	0.152129	0.151052	0.061904	0.312258	0.0800404	0.066506	0.109706	0.0648092	0.0894337	0.459167	0.166882	0.081624	0.075911	0.179293	0.162891	0.0884769	0.0631955	0	0.192642	0.0583596	0.0257495	0.170568	0.360143	0.0248063	0.0270658	0.489028	0.0556346	0.493281	0.0464374	0.340699	0.774112	0.0551982	0.272509	0.163631
LINC00507	9.04521	0.0790003	8.76519	2.80541	5.9925	0.612415	0.0689629	0.0173585	0.0210766	1.97999	0.00890198	0.0676864	0.0102094	0.473112	0.0202977	0.0611183	0.328713	0.0414502	0.292719	0.0214377	0.178127	0.00918227	0.0867911	0.00998064	0.349861	0.751721	0.0234234	0.00847153	0.150065	0	0.0253899	0.177723	0.0234717	0.343976	0.00976924	0.0086208	0.239842	3.47942	0	0	0.0396907	0.285601	0.250224	0.139923	0	0.671918	0	0.319321	0.0486957
AC023024.2	0.421619	6.14167	0.290791	0.530494	0.702857	0.0764127	0.374919	0.0471849	0	0.0812399	0.58075	0.711426	0.0888056	0.487343	0.176559	0.243666	0.100808	0.901381	1.7005	0.314676	0.145259	0.0798715	0.424658	0.661972	0.195967	0.265087	0.093384	0.598724	0.228434	0.118592	0.128831	0.358873	0.114844	0.155836	0.0849772	0.0937344	0.533982	0.674232	0.0361203	1.50745	0.269724	0.0405047	0.707382	0.946642	0.256047	0.208737	0.0803738	0.1984	0.48976
AC126615.1	0	0.135868	0.089024	0.0645467	0.0300471	0.725193	1.54187	0.328392	1.44993	0.342669	0.27558	0.34923	0.175585	0.0856504	0.31418	1.33144	0.550839	0.855454	0.489046	0.516172	0.6127	0.347425	0.149267	0.205981	0.145868	0.4193	0.483414	0.116557	1.03235	0.306954	0.116444	0.34932	0.48441	0.492987	0.403237	1.0675	0.353564	0.59248	0.257099	0.498698	0.375439	0.640681	0.550842	0.641721	0.278438	0.231119	0.635655	0.282436	0.586242
RHOC	11.1458	15.9803	10.1365	21.049	14.8552	76.572	59.8624	64.0252	87.3886	119.933	42.0533	140.419	82.821	44.5244	55.9042	59.4045	84.4355	58.5587	47.8688	71.4593	186.999	104.079	67.4352	54.1829	61.9471	46.2453	109.036	37.0438	90.8244	104.27	79.6251	75.3879	59.9295	63.1111	49.9238	150.814	65.6954	113.387	61.5819	72.0125	129.271	91.1806	97.6777	70.8684	68.9779	67.2356	88.7719	81.8406	52.9255
LIMD1	0.552093	0.797004	0.725792	0.697902	0.621379	3.56903	2.61787	5.72859	1.58934	2.28479	2.89519	6.16312	1.80334	7.4484	3.28336	2.2957	6.18574	8.32807	0.692161	3.61072	4.87527	3.88759	5.26659	6.7753	3.7816	4.31996	1.39516	3.42443	2.20165	4.73716	3.55425	2.44563	2.30776	3.89667	4.1077	2.0888	2.96259	1.44027	2.81464	9.18361	2.83521	1.31645	1.15353	1.47809	2.69662	2.87726	6.82869	2.43056	1.90888
TCF19	0.625263	1.5	0.628804	0.431011	0.636695	6.60422	2.97787	10.8286	4.62151	6.32299	10.883	7.67653	6.49078	8.8967	5.7872	8.47269	9.62791	13.7095	1.30624	18.2841	7.24161	5.02792	6.22624	4.89657	3.80522	4.44247	3.19452	1.89908	6.91194	19.0636	8.80195	6.49496	2.45833	28.5037	7.53334	4.75216	6.64556	2.14167	11.5571	4.06822	6.41791	3.84083	3.47595	3.75183	16.6005	16.8969	9.0721	4.91749	6.52438
CAMP	0	0	0	0	0	0	0.902673	0.0252455	1.22612	0.253552	0.181254	2.00162	0.118785	0.0241431	0.738006	0.0592588	0.0245163	0	0.0486536	0.779454	0.550505	0	0.0946692	0.203216	0.0308378	1.09327	0.295239	1.01029	0.349199	1.29786	0.0246174	0.0246165	0.512044	0.166755	0	0.100302	0.664415	7.86607	0.096628	0	0.173174	25.8973	0.0873399	0.180888	0.128432	0.251283	0.134383	0.0265376	0.0354106
GNAI3	1.09301	1.45134	1.02439	1.22559	1.12502	4.27846	4.6773	6.06581	5.20195	4.20855	5.25391	4.00777	6.13299	3.84037	5.07366	5.77395	5.0464	3.71204	3.28402	5.17995	4.97256	3.98267	5.74545	4.58125	4.22217	4.20353	4.64859	4.03853	3.75525	6.90843	4.89512	4.57707	4.7215	8.11143	5.16277	7.27273	4.9692	2.85709	4.50354	4.95783	3.23082	5.982	2.85026	3.80123	4.68889	6.48653	5.19773	4.67599	3.6289
HAS2-AS1	0.0954827	0.345533	0.135321	0.305662	0.0948591	0.205929	0.915294	0.816823	2.49218	1.50252	2.13743	1.25225	1.6137	0.891317	2.95112	1.9665	1.00679	1.80045	2.95667	2.6642	2.0552	0.797692	2.43473	1.87861	0.844263	3.61576	0.87612	0.654176	2.31763	1.38779	1.53174	1.63379	1.30273	1.03758	2.10992	1.42502	1.7501	4.07346	2.57529	2.33973	1.22118	3.98535	1.71486	0.825376	0.870155	1.55194	1.38244	1.82734	1.41011
Z82246.1	0	0	0.0409082	0	0	0	0	0.123465	0.199881	0	0.464325	0.0534925	0.0484107	0.826517	0.192495	0.0966035	0.0799328	0.786194	0.237945	0.0508265	0.10558	0.0870809	0	0.236631	0.100543	0.096338	0.0370229	0	0.71158	0	0.0401313	0.321038	0	0.067961	0.185295	0.408781	0	0.163353	0	0.0429677	0.235256	0	1.75604	0.0737206	0	0.182063	0	0	0.173179
ADGRE1	0.0647644	0.0173179	0.358065	0.0767874	0.0612775	0.410819	2.35835	0.481993	1.98364	0.429492	1.12923	0.362701	1.49799	0.0582247	0.984831	1.5363	0.694717	0.629994	0.176004	1.29078	0.104128	0.402576	1.16057	0.840151	0.563974	0.48694	1.97173	8.91891	1.19304	0.43472	0.366107	0.682716	2.03068	0.226213	0.365491	0.231815	1.48216	9.14276	0.631132	0.301933	0.678658	1.86553	0.456373	0.299914	0.438787	0.185169	2.07955	0.949327	0.28466
GPIHBP1	3.06602	49.6158	3.05576	7.50207	5.97255	0.438548	0.884082	0.263739	1.64118	0.390233	2.58673	1.9604	0.610777	1.27687	3.5273	0.812536	1.17656	0.905312	6.0041	0.234109	1.43778	2.84257	1.80288	2.47367	2.9196	1.83283	2.98797	3.84532	10.6592	0.357799	0.884049	1.80018	1.04757	0.326642	1.16889	2.32493	1.55091	1.01412	1.68771	2.15121	1.74319	0.412709	8.85825	14.9702	1.14605	2.31524	1.01783	0.857705	13.4563
GJC2	3.57042	77.5066	2.63381	9.2279	10.9628	1.47431	2.16535	0.503109	0.83486	0.806067	5.86544	1.13348	0.907436	0.850012	1.3727	0.964442	1.13187	5.08581	1.47864	0.569561	0.494763	0.816146	1.10054	2.73846	3.5337	3.32701	0.701521	4.41144	3.0156	1.34113	0.915773	4.0636	1.21318	0.387708	1.56675	2.10716	0.926863	1.78061	0.296874	2.37245	0.766917	0.251931	9.36039	10.9047	2.68033	1.99382	0.723082	0.731589	9.40914
IL1R2	0.0111609	0.0278545	0.0365019	0.0198492	0.01848	0.0283186	8.21861	0.0795648	4.72632	0.210753	0.408034	0.365935	0.35277	0.239977	2.84837	0.660852	0.213969	0.526133	0.135646	5.98645	1.45237	0.142452	2.90713	0.570085	0.321474	0.465623	0.886442	23.7821	1.20637	0.622298	0.22082	0.119358	6.98477	0.373952	0.730235	1.69001	0.233561	0.315809	1.52269	0.274767	0.293883	0.367771	0.811677	1.12922	0.108977	0.602428	1.10118	0.218743	0.412067
AC103702.2	0.0107448	0	0.0117137	0	0	0.0136314	0	0.0235688	0.0858514	0.236712	0.0120868	0.0306342	0	0	0.0275596	0.0276615	0	0.16884	0	0.0436612	0.0151159	0.224413	0.176763	0.0135514	0	0.0137927	0.0318035	0.0345072	0.0815017	0.0403886	0	0	0.0159345	0.01946	0	0.0117051	0	0.0701621	0.0112763	0	0.1482	0.11802	0	0.0211092	0.0199836	0.351891	0.0125458	0.0743253	0.0165294
AC233280.1	0.112016	0.0254147	0	0.108664	0.0112409	0.0129191	0.133114	0.201034	0.216974	0.496758	0.183283	0.537117	0.512366	0.384511	0.274254	0.183512	0.32538	0.373372	0.484297	0.400002	1.23204	0.295398	0.125645	0.346768	0.341066	0.222224	0.241133	0.0654078	0.115864	0.535893	0.272268	0.0544517	0.151019	0.110659	0.339423	0.377175	0.352724	0.332478	0.128244	0.827893	0.485209	0.223706	0.605346	0.480147	0.435605	0.50643	0.190244	0.0587011	0.360309
H3F3AP3	0	0.157734	0	0	0	0.160362	0	0.092422	0.336655	0.0663027	0.047397	0.180192	0	0.0883861	0	0.108471	0.179505	0.220694	0.0445294	0.228282	0.355652	0.0488894	0.115526	0.425121	0.169343	0.0540866	0.166285	0	0.319599	0.211172	0.0901228	0.0901195	0	0	0.156044	0.3213	0.243238	0.366843	0.397967	0.144739	0.105663	0.396687	0.159873	0.248332	0.117545	0.357751	0.0983938	0.145729	0.259272
GSDMA	0.0769	0.0863645	0.419171	0.0273527	0.0424432	0.126828	6.66795	0.244587	3.42035	0.447736	0.778544	0.317908	2.39095	0.258103	1.54836	0.415742	0.58152	0	0.0487627	0.0937442	0.0540921	1.07967	0.284645	0.931073	0.576931	1.40174	0.0227616	12.5788	0.0583304	0.558848	0.164484	0.205598	1.16324	0.0557098	0.560101	1.13093	1.15423	1.22189	2.64709	0.54594	0.472475	0.193066	1.26441	0.302155	0.679353	0.457055	1.39174	0.141851	0.43771
AC067930.6	0.0415978	0.116794	0.0377907	0.0534301	0.0994888	0.290253	0.407818	0.296546	0.387763	0.207285	0.21057	0.58805	0.18783	0.767165	0.284521	0.21418	0.310134	0.526553	0.355362	0.201899	0.507177	0.277534	0.308898	0.459055	0.343661	0.253639	0.331755	0.218943	0.236647	0.221513	0.292876	0.32623	0.159365	0.0941728	0.162615	0.343642	0.155091	0.17354	0.189174	0.46441	0.447696	0.1795	0.359517	0.347323	0.261108	0.243873	0.271184	0.239788	0.45328
AC106806.1	0	0	0.0333245	0	0	0.349023	0.932351	0.469359	0.48848	0.673427	0.206317	0.479335	0.0394362	0.128247	0.117607	0.708254	0.260458	0.320223	0.161528	0.165617	0.731062	0.28375	0.251439	0.385527	0.327618	0.54935	0.0904785	0.0981701	0.463732	0.153203	0.0980748	0.294214	0.634655	0.49826	0.226416	0.632699	0.220583	0.665352	0.128321	0.280017	0.268301	0.863378	0.0773241	0.420378	0.227407	0.148311	0.428302	0.140966	0.658346
PTPN22	0.0609325	0.0332655	0.078882	0.0586984	0.0798719	0.367186	2.40608	0.183777	1.38956	0.389526	0.479801	0.559171	0.442179	0.235667	0.547006	0.833348	0.182525	0.538577	0.0684208	0.701526	0.182157	0.609798	0.527307	0.249757	0.316323	0.47908	0.537305	2.01394	0.606621	0.586913	0.378774	0.855265	0.796324	0.282786	0.192753	0.87536	0.351758	0.472484	0.835302	0.113378	0.200556	0.597571	0.351616	0.261861	0.339974	0.161675	0.702566	0.509301	0.228482
IPO7P2	0.0293978	0.0122281	0.0320486	0.0116184	0.0108169	0.26107	0.170792	0.311673	0.313186	0.138781	0.363765	0.0838151	0.101137	0.0616683	0.188508	0.252273	0.333982	0.256636	0.248551	0.199095	0.193	0.261516	0.389586	0.0988711	0.0393843	0.0880529	0.174029	0.157353	0.260153	0.13506	0.19912	0.178153	0.305178	0.372698	0.169359	0.469701	0.141426	0.0639878	0.452495	0.190752	0.0614355	0.153763	0	0.250271	0.209588	0.142633	0.217394	0.101677	0.165823
RPSAP43	0	0.205432	0	0.0325315	0	0.208856	0.478216	0.0902778	0.43846	0.215882	0.0617299	0.0782274	0.0353979	0.0863356	0.175941	0.282546	0.204564	0.143716	0.144988	0.185822	0.424601	0.222857	0.225691	0.346049	0.183794	0.387433	0.135356	0.146862	0.208123	0.171894	0.029344	0.176058	0.162762	0.0496931	0.304847	0.418461	0.118797	0.119444	0.172771	0.15709	0.309635	0.129161	0.312327	0.215618	0.0765452	0	0.288333	0.126531	0.253256
AP000695.2	0.0436724	0	0.0952209	0.12082	0.0964159	0.203153	0.95146	0.255455	0.348944	0.366522	0.327514	0.373539	0.319272	0.137419	0.33605	0.149908	0.232572	0	0	0.335205	0.163837	0.185805	0.2794	0.312119	0.0780109	0.261617	0.416524	0.327261	1.15943	0.565441	0.280238	0.17125	0.280654	0.342748	0.323479	0.539188	0.294136	0.316861	0.0458327	0.116684	0.0365067	0.137056	0.220945	0.228797	0.284283	0.423783	0.492929	0.453145	0.179157
YPEL2	7.70475	12.0909	6.77525	7.86826	6.99569	1.75211	3.552	1.11975	2.2818	1.59726	2.07885	0.992848	1.6924	1.39667	2.78111	1.95092	1.08741	1.97948	2.60759	2.58086	0.63465	2.01574	2.09679	2.82984	1.92446	2.85484	2.06149	5.19365	2.40883	1.34865	1.60398	2.7656	2.37678	1.09297	2.05178	1.82135	3.75796	2.49789	1.50753	1.81704	0.977496	1.99013	2.32485	2.35564	1.01566	1.25279	1.18979	2.9974	1.77455
SGK2	1.00759	12.8376	0.478702	2.16152	1.84363	0.606815	0.478326	0.223596	0.156629	0.666301	1.10698	0.609196	0.232668	0.493459	1.26706	0.958857	0.221314	0.69821	0.977855	0.631939	0.19856	1.42388	0.838474	0.672477	0.777362	0.910927	0.263037	0.625357	0.505557	0.221057	1.11952	0.654077	0.343041	0.745567	0.358156	0.533873	0.53754	0.332813	0.111092	0.808075	0.796386	0.41218	0.773559	2.47247	0.371876	0.347154	0.361643	0.316401	1.65861
AC021683.1	8.43363	0.666076	7.70231	2.7731	6.38487	0.27087	0.126861	0.0532198	0.0775432	0.0305435	0.131006	0.0968435	0.25041	0.335912	0.958364	0.0999385	0.0930288	0.305001	0.164106	0.657265	0.0136531	0.259	0.0798286	0.599759	0.351049	0.448487	0.0957526	0.124671	0.331265	0.01216	0.145308	0.134924	0.129532	0.0703072	0.239614	0.0317169	0.392182	0.0211241	0.010185	0.32227	0.0608445	0.0609137	0.41734	0.0571992	0.0270746	0.282522	0.192639	0.279719	0.149298
C1orf54	3.38912	3.29462	3.66705	4.27413	5.03016	15.0245	41.3705	17.7081	40.1286	22.7507	17.5486	27.0336	16.212	8.86681	10.923	15.9141	9.74745	9.17507	14.1258	14.3905	14.8393	14.7431	9.51866	12.7751	15.3898	17.5813	33.1376	15.4091	39.0904	12.3736	11.118	7.26243	15.7935	17.2878	5.65681	30.2551	7.82237	32.6018	6.10112	8.66261	18.4943	35.2142	14.0957	12.3939	13.4445	9.00695	10.4784	17.5023	7.84983
RPS23P8	0.571623	0.907845	0.736471	0.924191	0.917801	16.4817	43.9271	20.4607	49.9634	26.4946	20.5182	21.9274	13.4753	12.3181	14.0619	35.8534	16.9363	23.6805	32.4026	22.4535	36.8455	14.833	13.2508	17.3024	15.8035	31.9525	29.122	12.1829	34.293	15.6919	12.0599	13.2265	21.5783	23.9054	17.1926	47.6656	14.8497	28.843	20.8874	21.3618	13.5531	35.9597	24.0555	25.7272	14.1589	8.95059	14.3803	10.1249	33.4158
AC239800.2	0.0512858	0.0719974	0.0838656	0.0608066	0.113224	0.032532	2.51399	0.0421859	1.21225	0.282462	0.331726	0.292439	0.198493	0.100859	0.230203	0.330077	0.150214	0.335786	0.182928	0.182349	0.261543	0.089262	0.263658	0.590223	0.137416	0.559589	0.442753	0.363725	0.85097	0.168681	0.0548486	0.150828	0.370777	0.0348316	0.0791399	0.537741	0.120278	0.627918	0.296025	0.102769	0.249187	0.633736	0.389193	0.226701	0.0834605	0.0933114	0.224558	0.243898	0.384618
CYFIP2	61.4546	16.3598	60.44	52.2754	49.5173	9.20643	2.88096	5.20763	4.00965	4.75084	10.2086	2.92004	6.65258	11.3644	10.9547	7.7849	6.67794	13.4454	15.6538	8.97545	3.40377	14.806	7.56917	13.8962	9.20531	14.1249	7.7994	9.97345	5.24265	4.34121	6.15955	8.59948	4.38839	5.59412	12.8476	4.2122	13.0249	8.29629	13.3931	10.1577	5.52089	3.68207	13.0235	8.40189	7.96441	13.2702	4.61694	10.4215	11.7545
AC002044.2	0.0176791	0	0	0.020961	0.0195151	0.134572	0.462194	0.0193896	0	0.278198	0.099436	0.0756064	0.273695	0.296686	0.136037	0.0455132	0.0941477	0.185201	0.205524	0.0478922	0	0.102567	0.14542	0.0668909	0.165793	0.295023	0.156985	0.0946278	0.536399	0.0221513	0.283608	0.245785	0.13109	0.0640375	0.0218247	0.019259	0.0765447	0.153923	0.0185536	0.0809741	0.354679	0.221927	0.111801	0.138929	0.0822006	0.021444	0.0619272	0.142674	0.0271968
RPL10P7	0.0274379	0	0.0299121	0.0650631	0	0.243665	0.239108	0.0902778	0.365383	0.259058	0.216055	0.31291	0.0707958	0.0863356	0.105564	0.918274	0.204564	0.143716	0.23198	0.185822	0.2316	0.254694	0.112846	0.242234	0.0735174	0.105663	0.0812135	0.176235	0.208123	0.309409	0.205408	0.117372	0.122071	0.198772	0.0677438	0.44835	0.395991	0.358332	0.115181	0.15709	0.172019	0.172215	0.104109	0.269523	0.0765452	0.332811	0.160185	0.0316329	0.253256
LYPD8	2.33045	0.373075	3.54345	1.35427	3.08019	0.10698	0.0334025	0.00840764	0.0816682	0.132694	0	0	0.0692293	0.16885	0.068819	0.0197353	0.0898127	0.240919	0.0891186	0.0830674	0.0754919	0.00889494	0.115603	0.0773466	0.369723	0.314897	0.00756347	0.0246193	0	0	0.0491909	0.0737836	0.0113686	0.0833032	0	0.0250531	0.0995731	0.717491	0.0321805	0.00877793	0.00961217	0.0481155	1.5901	0.0451815	0.0071287	0.204566	0.00895089	0.114894	0.0471719
GSTO2	1.53493	0.793762	1.28892	1.54526	1.99772	0.197361	0.293734	0.0530814	0.142713	0.16048	0.256663	0.0936348	0.162789	0.161355	0.332516	0.111248	0.171214	0.126753	0.37449	0.224762	0.034044	0.15644	0.191943	0.161322	0.375146	0.272919	0.124496	0.405237	0.262225	0.142942	0.0998246	0.153428	0.1051	0.306794	0.0725509	0.116746	0.212045	0.357423	0.123354	0.130631	0.127875	0.13019	0.45036	0.152814	0.200924	0.222243	0.104949	0.229172	0.29516
DDIAS	0.128479	0.0801619	0.143566	0.137097	0.0602742	1.76035	0.461847	2.77239	1.018	2.91636	2.29796	1.08517	1.02766	2.58058	0.897993	1.75301	2.43232	3.0283	0.295325	3.68059	1.69901	1.48331	3.63717	1.17478	0.58522	1.1421	0.370777	0.261321	1.03545	1.22747	2.43548	1.50108	0.409648	2.33853	2.35926	2.06442	0.964204	0.601247	2.81129	2.75841	1.23642	0.594721	0.426557	0.54899	1.33513	2.14669	1.75517	0.80356	1.176
TPT1P4	0.198251	0.206158	0.360213	0.117527	0.0364733	4.10803	18.7163	5.50828	16.4563	13.4146	4.98062	4.1921	2.64291	2.66853	3.00862	16.6724	3.27286	4.49979	5.72688	4.87827	4.64837	4.2173	3.80501	3.0421	2.65598	5.85323	6.78083	3.32492	12.4062	4.84384	3.18035	2.50885	5.14511	4.54802	3.38556	13.786	4.53025	6.6166	4.40388	4.01048	3.77018	10.7323	5.76713	6.81596	2.12011	3.76737	3.39506	4.15219	7.62453
FUT1	1.63077	0.295637	1.83808	0.880142	1.72603	0.360676	0.326895	0.194878	0.189296	0.155337	0.270948	0.38839	0.19867	0.339604	0.248132	0.0508264	0.315415	0.165457	0.304631	0.187191	0.233307	0.384856	0.216528	0.263939	0.502544	0.30412	0.38958	0.329705	0.703846	0.103896	0.198476	0.23225	0.158105	0.0929672	0.229101	0.275294	0.227948	0.41254	0.1699	0.207982	0.257455	0.123917	0.529375	0.279266	0.110156	0.220316	0.221301	0.245823	0.473799
MELK	0.0388859	0.0693204	0.0423924	0.0461048	0.0183962	5.90585	1.52492	5.11779	2.29326	4.46694	13.0041	2.36779	4.72288	13.4885	4.83025	4.03294	4.9463	9.57294	0.228965	6.23018	3.71215	1.67589	13.2589	4.40688	2.08383	6.41785	1.79225	0.416277	2.63356	14.582	6.43415	4.37839	0.692014	17.2143	10.9724	6.03344	3.46348	0.725486	4.36661	8.21197	2.47971	2.10945	1.04688	1.02588	10.9774	12.2028	3.36638	2.24156	5.1873
FABP6	2.41614	2.35318	3.62979	3.93019	4.58605	0.299049	0.385161	0.032316	0.235428	1.15916	0.0828634	0.0630053	0.532185	0.772619	0.264516	0.265494	0.203987	1.46618	0.79407	4.80918	0.248712	0.102567	0.565521	0.46452	3.94746	2.23158	0.0872138	0.36274	0.446999	0.0184594	0.110292	0.157554	0.0218484	0.160094	0.745676	0.320984	1.53089	3.30292	1.00499	3.98123	0.0738915	0.254291	1.60248	0.868307	0.191801	0.39314	0.051606	0.3397	1.3825
HSPB3	5.94955	1.22827	5.69913	7.88392	4.49096	0.554995	0.190616	0.0479793	0.174769	1.96193	0.0492107	0.0623624	0.28219	1.62889	0.392725	0	0.722199	1.37484	1.04025	0.681426	0.123087	0.177661	0.0899599	1.68279	0.967026	14.6006	0	0.0702467	0.663657	0.0274066	0.187143	0.35088	0.0648763	0.673456	2.2142	0.0953126	0.536659	4.23729	0.183642	2.0037	0.274266	0.102967	1.90889	0.214862	0.142383	1.06126	0.0510794	0.277393	0.201895
SNRPD2P1	0	0	0	0	0	0.614571	3.16616	0.956333	3.35451	1.98196	0.653918	0.483397	0.249985	0.558905	0.62126	1.37183	0.825521	1.01494	0.460766	0.918611	1.70375	0.505881	0.996166	0.733154	0.259595	0.87058	0.525747	0.518582	1.28607	0.971153	0.569887	0.673478	0.574724	0.70188	0.837229	1.84702	0.629224	0.632648	0.254194	0.332817	0.485931	1.29222	0.245078	0.475852	0.315335	0.411313	0.735313	0.446792	1.04331
AKR1B1P7	0	0	0	0	0	0.206325	0.157474	0.158549	0.481274	0.170612	0.2236	0.0257598	0.0233126	0.113719	0.092698	0.232602	0.115477	0	0.0763898	0.195808	0.0762647	0.0838693	0.0743188	0.182323	0.0968354	0.324747	0.160459	0.0967218	0.205601	0	0.0773024	0.0579747	0.133991	0.0981819	0.156153	0.177167	0.130398	0.196661	0.32239	0.103457	0.067974	0.226838	0.13713	0.213005	0.184843	0.109593	0.168794	0.0624991	0.38918
PANX2	13.384	2.98016	10.9868	9.5893	13.0836	1.99183	1.13214	0.976167	0.456435	1.02652	0.348251	0.898405	1.24811	1.49018	1.06347	1.45167	1.35424	1.38991	1.5249	1.04832	0.995489	0.878796	0.575991	0.885481	3.76978	0.865769	2.32902	1.52686	1.97086	2.2027	1.08787	2.45943	0.467311	1.3016	0.921322	0.548032	1.29252	2.87588	2.0306	0.34816	1.58045	0.650595	4.6777	2.04184	3.04852	1.87085	0.69713	1.8738	1.81145
KLHDC8A	3.66835	0.826428	3.37443	4.75031	3.49455	129.021	7.61334	80.0842	17.5261	33.1199	19.4597	122.692	23.984	114.905	20.8903	64.7888	113.805	13.4082	13.8544	31.3011	92.4959	48.0418	27.5018	18.8498	27.3349	21.5007	90.7285	4.96279	54.546	51.9249	88.1937	15.3104	39.6136	67.7479	72.0508	141.315	30.4233	30.7218	44.847	11.6172	28.3283	19.6784	19.3963	18.1693	75.4847	11.5768	103.467	78.936	65.4356
AC023043.1	0.140794	0.0702766	0.184188	0.0333862	0.124333	0.178619	1.22695	0.0926497	0.524976	0.797592	0.253407	0.321131	0.217967	0.177208	0.361126	0.144985	0.149956	0.442476	0.148797	0.953519	1.86187	0.196039	0.308828	0.071028	0.490418	0.289172	0.444518	0.572739	0.320386	0.317538	0.331264	0.150569	0.292316	0.662983	0.451903	0.858909	0.243837	2.0226	0.0591033	0.161217	0.0353078	0.220925	0.142459	0.221283	0.471337	0.136622	0.0657574	0.519423	0
AC233964.1	0.0314944	0.0786013	0.0343343	0.0373411	0.0347652	0.279689	0.411688	0.43177	0.335522	0.223018	0.247997	0.381619	0.284419	0.313815	0.50488	0.648636	0.419299	0.742336	0.266277	0.234624	0.332301	0.219261	0.23747	0.297907	0.147676	0.222356	0.668079	0.387722	0.836122	0.631383	0.454711	0.31997	0.443709	0.256679	0.466555	0.360245	0.386355	0.274206	0.181787	0.288503	0.355412	0.370642	0.318669	0.40218	0.395378	0.305611	0.569988	0.236012	0.339148
RRM2P3	0.132707	0.0552	0.0803742	0	0.0813829	0.224479	0.256995	0.194062	0.785433	0.162422	2.63732	0.0630595	0.342413	0.0618627	0.359294	0.379603	0.266981	0.0772336	0.0155834	0.738973	0.124463	0.359293	0.242575	0.130177	0.256805	0.227136	0.218222	0.0789243	0.391461	0.517308	0.331161	0.189228	0.15307	0.854568	0.400463	0.16063	0.574579	0.545611	0.448763	0.118189	0.0554663	0.694117	0.0745982	0.173811	1.50831	0.625988	0.327119	0.492988	0.0680504
VIP	13.3054	1.22937	10.8936	5.22425	11.1976	0.686736	0.330208	0.0949893	0.0865018	1.72065	0.194854	0.308662	3.01687	1.04468	0.333221	0.0557422	0.495821	0.340237	0.892444	0.513239	0.167535	0.150742	0.578833	0.286735	1.00077	1.5148	0.267037	0.0811266	1.23179	0.0271298	0.231566	0.659938	0.0321105	0.411757	0.200473	0.330224	0.281244	2.80418	0.0568086	0.0495864	0.420818	0.135902	1.76637	0.48919	0.04027	0.459611	0.113768	0.386923	0.266473
ASF1B	0.0893161	0.241484	0.162283	0.211794	0.0903759	10.7363	3.30797	18.7181	3.98449	9.46356	13.6307	8.65798	4.67632	16.9717	5.14497	6.97474	14.0711	16.8807	0.597823	17.2293	10.7955	5.15586	9.85686	7.23751	5.75352	8.91421	2.94475	1.56966	6.60546	20.0879	10.8416	6.81357	2.00891	35.1427	15.0781	8.35955	5.51062	2.17088	12.8338	9.19596	5.69292	4.30958	2.44759	2.92451	15.9331	11.1045	11.0023	4.07596	15.3087
MORF4L1P3	0.0180513	0	0.039358	0	0.0597779	0.0687025	0.550578	0.17818	0.817305	0.340866	0.243671	0.128663	0.0698643	0.132533	0.138901	0.604128	0.211485	0.1891	0.209851	0.268953	0.152369	0.209453	0.123734	0.136598	0.120917	0.139031	0.24934	0.135268	0.342307	0.180941	0.115832	0.154436	0.34801	0.490393	0.133705	0.471948	0.208417	0.235745	0.246274	0.227367	0.181073	0.453198	0.0913238	0.283708	0.0671449	0.175164	0.231847	0.228922	0.249924
PSMA6P1	0.0694279	0.202152	0.126147	0.411583	0.383191	1.35056	3.42851	1.64981	2.58875	4.77066	1.50992	2.54028	0.567274	0.970935	1.3059	2.85978	1.25708	2.42436	1.46749	1.19117	3.48365	0.939851	1.93533	1.34263	1.55022	1.78245	1.25583	0.594585	2.36982	1.30486	0.990013	0.668234	0.652091	2.26335	0.97136	3.706	1.169	2.06528	2.16158	1.32498	1.07367	2.03358	1.08301	1.86411	1.59254	1.31934	1.05385	0.667022	2.20731
PPM1H	16.3232	17.9786	14.3488	11.6127	14.6709	3.45604	1.25893	1.72022	0.730715	0.695357	1.55406	1.3983	1.2592	9.8222	1.75928	1.50639	3.1859	2.82325	2.85593	0.70706	0.368895	2.51295	1.8307	2.99173	2.7128	2.30324	1.41814	2.56276	2.17316	0.176445	1.49566	1.86172	0.903768	0.63761	1.24388	1.6478	1.75906	1.75454	1.25874	1.23995	1.41259	0.582899	3.00636	2.08925	0.677343	2.01734	1.83137	2.46047	1.75922
AL353705.4	0	0	0.0785506	0.0854295	0	0.0914109	0.313955	0.553173	1.15142	0.226766	0.648423	0	0.0929567	0.226722	0.0924058	0.74198	0.0767422	0	0.228447	0.390382	0.101366	0.083605	0	0.181748	0.0965302	0.184985	0.14218	0.154267	0.546541	0.722244	0.0770588	0.154112	0.106855	0.521987	0.0889493	0.235478	0	0	0.0756175	0	0	1.35674	0.091132	0.283112	1.07206	0.78658	0.0841308	0.0830695	0.221688
HIST1H2BH	0	0	0.0490683	0	0.0496841	2.22697	0.784476	1.08602	1.67827	2.26647	2.22778	1.66823	1.45169	2.54928	1.38536	1.27461	3.02014	28.0548	0.0951363	4.0237	5.57219	0.522257	0.925572	1.30563	1.74869	7.51108	0.266449	0.530015	0.682818	1.57908	0.625774	1.73285	0.333747	2.69008	3.16716	1.42193	0.324796	0.0979691	1.27537	6.03002	0.620805	0.706263	0.341566	0.353704	2.51132	2.07461	3.04814	0.467021	5.0546
DDX39A	3.97457	12.26	3.47611	6.12614	5.89087	29.1607	23.545	29.0102	24.5373	42.3822	18.5672	35.2303	9.89229	39.2379	18.9056	16.9808	32.8859	32.7478	8.29715	26.9901	49.6071	23.6496	31.5726	22.946	30.2673	26.0605	11.7423	11.3732	25.2024	27.4516	32.0472	22.6663	19.7227	38.014	37.7972	27.8322	13.8249	16.6704	17.7017	27.01	28.7539	20.1394	18.7636	16.6258	33.202	26.6888	30.1546	16.2952	33.0173
AC104297.1	0	0	0.0644657	0	0.0435164	0.15004	0.0858866	0.12971	0.419981	0.0620349	0.177385	0.168594	0.178007	0.165394	0.101115	0.101489	0.146957	0.206489	0.3958	0.213588	0.22184	0	0.21618	0.174019	0.343293	0.278328	0.136134	0.126606	0.299027	0.0987897	0.126483	0.126478	0.17539	0.142796	0.170333	0.407982	0.312924	0.128711	0.227548	0.203133	0.123577	0.278365	0.124652	0.154898	0.164968	0.215179	0.184121	0.0681743	0.363874
TRAV12-2	0	0	0	0	0	0.0977789	0.335826	0	0.307907	0.363845	0.0433496	0.054935	0.0994323	0.0808385	0	0.297626	0	0	0.0407269	0.208789	0	0.134144	0.158491	0	0.258137	0.0494679	0.0380213	0.536295	0.146154	0.0482848	0	0.20606	0.0571495	0.0697937	0	0	0	0.251638	0.121328	0	0.19328	0.0604688	0	0	0.0358358	0	0.0899916	0	0
AP004245.1	0.0662112	0	0.144363	0.0785027	0.0730875	1.17599	1.154	1.16188	2.99784	1.56285	1.04273	1.41579	0.597938	0.486124	0.764221	2.21591	1.26936	1.38722	0.629773	0.896824	1.11776	1.4597	0.363082	0.751554	0.620924	0.934925	0.84924	0.637916	0.251113	2.07401	0.495675	0.849698	1.0801	1.31907	0.57216	2.09172	0.668904	3.02645	1.45921	1.21305	1.16229	2.38957	0.753686	0.390235	0.923566	0.803115	1.23695	1.22135	1.22228
GINS2	0.388788	0.996532	0.378025	0.579318	0.591552	4.38582	1.71694	8.91415	3.59618	13.3686	5.59096	5.39251	5.8156	9.82539	3.13313	5.59963	8.06912	13.7046	0.477518	8.02723	6.77778	3.59066	7.07303	5.18172	3.09701	8.1538	1.40477	0.45557	4.50327	8.54467	5.5683	4.30952	0.709028	10.7809	9.31373	7.34888	4.05667	1.90977	3.41303	5.17978	2.97767	3.38831	1.12301	2.57013	6.48332	5.99676	4.98125	3.08309	9.83625
IGLV3-21	0.0284862	0	0	0.0337744	0.220112	0	26.1897	0.0624847	12.2907	14.1202	0.0640883	0.121824	0.404253	0	7.59877	0.366676	0	0.149207	0.150527	20.9127	0.240449	0.0330531	0.702943	0.035927	0.61061	25.4871	0.224844	2.16512	1.40448	0.392615	0.0304651	0.15232	0.0844901	0	0	0.279288	0.411121	104.29	0.448429	0.0326183	0.64293	0.0893974	0.216173	0	0.0264899	0	0.066522	0	0
RPSAP15	0.0995859	0.0994156	0.0434264	0.0236146	0.0219857	2.14778	4.07886	3.16741	5.51682	4.32515	2.10606	2.61212	1.36185	1.52499	1.58367	1.89718	3.41534	1.04324	4.23092	3.1294	5.32376	1.68705	1.50177	2.58733	1.01396	3.24702	2.02405	0.660966	3.77691	2.49556	1.66146	1.8531	1.44732	2.63327	2.75381	6.1837	0.948585	2.9913	1.12873	4.44723	2.0978	3.00026	1.6626	1.68256	1.3891	1.20794	2.44184	1.0333	2.48183
AL360271.1	0	0.0419592	0.036657	0	0	0.213292	0.146512	0.184391	0	0	0.189123	0.191734	0.0433798	0.105803	0.258736	0.173129	0.035813	0.352246	0.177681	0.0455446	0.094608	0.195078	0.138291	0.0424079	0.18019	0.0863264	0.0663509	0	0.382579	0.0421309	0.179804	0.107878	0.199463	0.0608984	0	0.18315	0.0970567	0.0731887	0.105865	0	0	0.105524	0	0.0660595	0.0312685	0.0407856	0.0785221	0.193829	0
AC006539.1	0	0	0	0	0	0.0868495	0.149144	0.150163	0.546981	0.107725	0.0770083	0.0975891	0.0441591	0.25131	0	0.352478	0.182282	0.179287	0.180873	0.139088	0.240769	0.278016	0.0469252	0.215849	0.13757	0.263632	0.168857	0.0732846	0.129817	0.0428877	0.10982	0	0.203046	0.185977	0.0845107	0.410168	0.0988002	0.0745035	0.0718441	0.235164	0	0.537098	0.173169	0.134492	0.222811	0.0415183	0.119899	0	0.315939
AL035530.1	0.0518088	0	0.0564805	0	0	0.0657275	0	0.0568214	0.275969	0	0.233119	0.0738552	0.200517	0	0.199329	0.400131	0.11036	0.271367	0.219015	0.0701744	0.0728854	0.360689	0.213077	0.261366	0.138817	0.266021	0.357814	0.33277	0.196491	0.0649147	0.221631	0.166217	0.384162	0	0.191873	1.07234	0.0747718	0.112768	0.489343	0.237296	0.259848	0.16259	1.96581	0.508917	0.048178	0.125684	0.241971	0.119459	0.239102
SLC1A5	0.859494	1.53494	1.91327	1.84894	1.51687	2.97738	13.1637	13.0786	5.60631	3.55537	15.099	7.93837	7.25726	7.76251	9.88082	4.10739	10.1629	4.96019	5.45554	5.8627	8.14546	6.46744	9.0101	7.42572	10.0322	6.48769	3.65607	11.2835	11.3603	21.7447	5.61428	4.62336	8.60947	9.64743	9.40321	7.92777	9.89384	7.79684	7.14045	10.2778	9.95746	7.60742	8.65754	4.62079	21.9629	7.85956	11.9526	4.62816	6.77732
AC011825.1	0.0441977	0.0551526	0.0481831	0	0.0487878	0.224286	0.577742	0.339317	1.05942	0.695495	0.298308	0.252021	0.228079	0.139071	0.170046	0.796481	0.235369	0.231502	0.37368	0.239461	0.497424	0.205134	0.121183	0.334454	0.0592119	0.737557	0.261642	0.189256	0.335249	0.387648	0.283608	0.189065	0.196635	0.160094	0.218247	0.818509	0.191362	0.384807	0.23192	0.202435	0.0554186	0.346761	0.335403	0.347323	0.369903	0.32166	0.051606	0.10191	0.475944
LONRF2	33.0838	6.73477	30.4571	37.4131	21.9105	4.12693	1.01895	1.75484	0.908017	1.75666	4.56755	1.38434	2.04834	8.96424	3.35895	2.94678	5.34319	4.75126	4.40697	2.01052	2.88469	4.76278	3.25485	0.676798	2.00177	1.77269	3.45846	1.51126	3.60832	3.83378	3.73171	4.41602	0.90351	4.87284	2.07247	0.71062	4.92929	1.28055	3.24211	1.36423	1.28246	1.11821	3.41539	4.64261	4.58389	1.99303	4.93932	3.20546	1.06599
DGCR9	5.30438	1.2937	9.21979	3.94015	6.01986	0.477456	0.154702	0.521792	0.0945609	0.681614	0.69494	0.263187	0.67791	2.65144	0.71032	0.164526	0.491595	1.82249	2.25887	0.990665	0.119876	0.634428	0.895601	2.43595	2.72075	1.14852	0.28024	0.440891	0.915654	0.418169	0.774609	1.08593	0.115837	0.694469	1.73567	0.139239	0.840354	0.54096	0.409869	1.09768	0.293822	0.467976	0.79932	0.348761	0.567882	0.921603	0.439431	0.335649	0.92852
LRR1	0.639714	0.798275	0.451724	0.534378	0.57776	5.21992	4.65622	4.94315	4.22073	10.9359	4.82469	3.51302	2.35398	5.37539	2.94602	3.51835	6.47276	3.76958	2.05896	6.14417	4.18277	3.31493	6.44793	4.18992	3.78845	6.76541	2.32383	2.03111	5.5692	4.63619	4.23709	3.30403	1.81115	8.50513	6.54213	6.83422	2.33961	2.97471	4.53929	6.14308	4.36611	5.19009	2.03195	2.74207	4.54274	2.60119	4.01481	3.31046	6.16188
ASPHD1	33.9265	56.9782	40.293	43.0476	46.8492	9.06178	4.49233	4.62876	1.40259	3.66494	4.40546	11.3772	11.1193	10.2847	2.34955	2.69241	4.28176	5.47794	5.76941	1.17545	9.3182	1.45448	8.26698	4.8925	9.35066	6.89342	2.1003	4.57357	15.7251	9.30288	8.64645	4.25961	5.82989	7.75112	7.39849	3.89463	1.93757	8.81493	1.82928	3.29535	5.1617	1.19878	17.5992	12.561	7.22853	5.12819	2.93592	9.24392	24.6465
KCNAB1	11.4099	4.03812	10.6135	11.7151	9.36813	0.61597	0.577967	0.483098	1.07317	0.921561	0.83052	0.406721	1.41098	0.711378	1.65618	0.560546	0.871649	1.95324	1.85414	0.786462	0.316879	0.635969	0.641606	1.61926	1.67311	1.49068	0.916102	1.1199	1.02512	0.451561	0.484463	0.827036	0.57529	0.639114	0.645726	0.678873	2.68733	2.21168	0.887766	0.704978	0.464442	0.918946	1.96889	1.16038	0.388665	1.06857	0.37989	1.02719	1.47459
IL1RAP	1.07866	0.522113	0.915504	2.25171	0.930268	6.31328	3.80136	19.1561	3.9951	3.7006	2.09463	6.77671	3.86083	8.72406	3.15104	21.3482	29.6615	8.1445	0.519023	5.09652	15.995	6.678	17.3464	2.18938	1.07934	1.71032	7.74537	2.76844	17.3541	6.76318	24.5649	5.02991	8.47571	16.2761	13.4918	14.1556	5.05567	2.35106	2.03824	0.880045	5.84722	2.4492	0.987077	2.13079	0.451172	1.77988	27.5418	22.114	2.42856
AF106564.1	4.23176	1.34112	4.46689	3.01041	4.57485	0.110782	0	0	0.0894495	0.20083	0.0302242	0.0478771	0	0.0915885	0	0.293973	0.0500793	0.246282	0.205868	0.0363928	0.0377987	0.0155879	0.110503	1.04201	0.503938	0.293165	0.0132546	0.165386	0.152852	0	0.0143674	0.0933847	0.00996143	0.121654	0.00829218	0.0365869	0.697987	0.584822	0.021148	0.138446	0.0505345	0.02108	0.603192	0.263927	0	0.0488852	0	0.131649	0.278999
CACNG3	37.8515	7.30401	43.1052	25.9288	38.3987	1.05679	0.0725919	0.0182719	0.118324	0.629189	0.0124939	0.150413	0.00716441	1.50859	0.0213659	0.0714829	0.981843	0.116351	1.56115	0.947764	0.101563	0.0966547	0.33498	0.455253	2.27659	2.97977	0.0273955	0.237795	0.947774	0.00695815	0.332591	1.09276	0.0164712	0.83479	0.438755	0.0967941	1.21824	3.14275	0.0233121	0.0127178	0.139264	0.0871393	7.18532	0.414583	0.00516416	1.1047	0	0.825907	0.435695
RPL29P33	0.108536	0.067719	0	0.0643424	0	1.17041	4.25628	1.48796	1.44535	1.11015	1.09883	1.08305	0.42007	0.569195	0.417581	1.39708	1.04039	1.70549	0.917644	1.47011	1.37421	0.692651	0.446383	1.02665	0.727032	1.4629	1.1244	0.697132	2.05818	0.747957	0.696456	0.812502	1.36815	0.884569	1.20588	1.95089	0.861532	0.826847	0.569524	1.67778	0.952639	1.53277	1.23547	1.27938	1.05976	0.592424	0.823736	0.688215	1.58619
AC141557.1	0.428717	0.481482	0.327163	0.559136	0.993807	0.598284	1.49443	2.44502	3.19711	4.85734	2.89359	0.488921	1.10618	7.95906	10.8314	1.65554	1.1872	11.2278	3.39815	17.1304	0.301563	1.9898	6.52389	2.75758	66.74	168.841	1.01517	0.321261	1.78856	0.322301	3.3929	3.43862	0.445052	3.88227	18.9471	1.40109	21.7795	1.30642	2.29461	2.50362	5.16058	0.87453	1.62671	3.20058	0.837213	1.61205	1.00116	1.08738	1.18714
CORO6	8.4414	1.4659	4.98852	2.58799	7.56573	0.745165	0.985678	0.178459	0.3171	0.549571	0.232148	0.311163	0.133121	2.01053	0.615854	0.214558	0.262071	0.519687	4.03489	0.54293	0.178663	0.336161	1.01742	1.02109	0.685876	0.555298	0.250601	0.573549	0.918153	0.119343	0.30984	0.568727	0.129482	0.733149	0.137181	0.0864673	0.4754	0.544215	0.345695	0.21813	0.771321	0.0498192	1.32516	1.02919	0.202981	0.452502	0.301204	1.0066	0.305264
RPL15P3	1.47785	2.01814	1.79351	1.75221	1.84679	14.61	38.2719	16.5448	31.5626	28.126	13.6759	22.4188	13.0224	11.8741	11.8367	14.4288	21.6206	19.7172	17.7698	22.8878	39.0316	11.1299	13.7617	22.5424	8.55462	33.5746	14.4435	8.77593	24.3233	22.7096	11.9583	10.765	12.2816	23.786	20.3438	33.1707	9.61808	27.6153	9.62764	34.068	11.398	27.0399	17.0694	14.9552	14.806	10.5525	19.5348	11.6052	39.9788
SLC40A1	2.67726	2.35243	3.3936	2.07548	2.35637	29.192	76.1881	14.2818	31.4437	32.9431	15.4859	39.2379	9.71297	2.41344	18.8385	17.0678	13.8061	10.9115	21.7565	35.0025	27.6742	41.4319	21.859	9.07079	12.6756	35.3839	16.5365	27.6003	24.7987	3.52323	13.8588	10.1396	25.3258	12.8321	9.00578	28.997	23.8349	58.903	50.2626	16.7157	15.886	32.0728	7.30828	11.5465	7.80036	9.34349	11.1908	8.53832	12.4593
ITPKA	32.7973	2.9562	38.391	21.9067	48.039	2.97426	1.96447	2.01385	1.44092	3.19901	1.34628	3.10834	0.592221	5.33923	1.04076	1.56163	3.24782	18.892	1.70666	3.26432	4.48597	2.37787	1.86548	1.56111	2.2513	3.63029	1.01096	1.23731	1.36792	3.61536	2.50728	4.34814	2.49209	2.98408	3.71385	1.21446	1.57346	3.96101	4.61968	2.38413	2.98074	1.46634	12.8457	2.83437	1.64653	3.64907	2.2014	2.03187	3.7705
RBMS2P1	0.0559501	0.034909	0.106742	0.0497525	0	0.230689	0.426631	0.291476	0.149014	0.154075	0.283222	0.119638	0.180454	0.0440128	0.2332	0.0720193	0.223466	0.439589	0.295652	0.18946	0.137745	0.27591	0.210934	0.264617	0.112435	0.143643	0.345014	0.449212	0.106098	0.192785	0.224388	0.254297	0.331896	0.202664	0.13814	0.228564	0.181684	0.243564	0.264229	0.112116	0.122771	0.241431	0	0.10992	0.156087	0.203596	0.31031	0.258017	0.215178
LINC02453	0.0894093	0.167356	0.0584829	0.0318022	0.0789558	0.147458	0.350621	0.0784479	0.85726	0.801958	0.241384	0.165693	0.299904	0.393867	0.252261	0.322247	0.17141	0.0468314	0.264576	0.702403	0.352191	0.394225	0.429006	0.439778	0.443194	1.0559	0.202893	0.14357	0.203457	0.235257	0.172117	0.325097	0.0397782	0.226702	0.143488	0.253239	0.193557	0.720058	0.356561	0.778078	0.560543	0.547151	0.373175	0.333742	0.241116	0.184365	0.0939563	0.226774	0.797753
UMODL1-AS1	1.8262	0.0599698	2.20044	0.645768	0.981406	0.0711306	0	0	0.127995	0.025208	0	0.0228361	0.0516667	0.134416	0	0.144341	0.0511854	0	0.0677197	0.043396	0.0112681	0.00929378	0.0439225	0.0202037	0.879908	0.133663	0.0158052	0.00857441	0.182265	0	0	0.0171315	0	0.072532	0.00988787	0.287941	0.0462391	0.244076	0.0252176	0	0.0401727	0.0251365	0.496395	0.251773	0.0148967	0.0582924	0.00935223	0.0646398	0.0123218
AC096708.3	0.0310665	0.0775334	0	0	0	0.157651	0	0.136289	0	0	0.139787	0.620009	0.0400792	0.716856	0.119525	0.239934	0.0661763	0.488167	0.0984971	0.0420792	0.262229	0.144188	0.0425897	0.0391812	0.0416199	0.039879	0.214559	0.0332569	0.117823	0.0389253	0.132899	0.0664468	0	0.0562649	0.0767027	0.0338429	0.22418	0	0	0.0711457	0.155815	0	0.0785848	0.0610332	0	0.0753648	0.0362738	0.250713	0.0955829
LINC01993	0.0116896	0.00729353	0	0.00692986	0	0.0519054	0.509348	0.0897445	0.809473	0.00919741	0.604886	0.016664	0.369482	0.852125	0.352301	0.662067	0.267682	0.306144	0.0123541	0.823342	0.0246677	0.0135637	0.152243	0.206403	0.156607	0.697761	1.63774	0.212735	0.0665014	0.908098	0.106264	0.0625062	0.36405	0.243469	0.310262	0.038203	0.447076	0.0254439	0.0122679	0.147238	0.447051	0.0733705	0.251343	0.0344482	0.440252	0.141791	0.668803	1.37464	0.0179829
TSPAN6	2.65833	1.95353	2.5229	2.03098	2.28325	24.1449	13.0824	19.488	37.1124	43.6523	31.3243	19.228	22.5725	14.9326	19.6018	16.3449	23.2386	15.2114	15.326	20.3697	35.2912	25.1588	17.014	21.113	12.67	23.2122	18.1358	8.27012	31.9957	15.5358	19.0558	24.5064	14.7935	30.5309	19.8068	28.7037	13.2343	35.2439	24.9616	1.58475	18.6244	56.9383	16.3663	19.3301	14.2028	15.5948	17.6257	21.4533	18.1496
AC104996.2	0.0342974	0.0427984	0.0373901	0	0.0946483	0.130535	0.373607	0.338542	0.548075	0.188896	0.154325	0.244461	0.110618	0.179866	0.241919	0.176591	0.0913232	0.359291	0.253729	0.139366	0.14475	0.139286	0.047019	0.237908	0.229742	0.220132	0.186114	0.0734312	0.260153	0.171894	0.05502	0.0916966	0.0508631	0.124233	0.14819	0.186813	0.148497	0.0746525	0.197967	0.0785449	0.172019	0.0807258	0.0650682	0.168452	0.159469	0.145605	0.0800925	0.138394	0.158285
PDZK1IP1	0.0834777	0.0892874	0.429024	0.212088	0.526555	0.257196	2.02652	0.209267	12.1329	0.825694	0.120734	0.816002	1.83082	0.0625403	1.95762	5.46475	0.26673	0.124927	0.201652	3.26287	0.0838841	0.193722	0.294278	0.436171	2.22073	0.581713	2.17671	4.58307	0.633197	0.956295	0.204061	0.26782	1.75085	0.151187	0.338601	0.441699	0.585175	3.42633	0.588218	0.150208	2.04856	3.87349	2.5792	0.492001	0.144165	1.08488	1.32281	1.48485	0.238492
LINC00511	1.33766	0.596148	1.27816	1.36413	1.07448	1.47985	2.40253	5.50373	9.80258	4.42601	5.07847	7.25579	6.85154	8.86906	6.17018	8.3991	10.3652	12.3135	4.65131	10.8252	16.4605	13.6156	8.71885	10.7726	9.05367	16.2052	7.05257	2.6679	4.07669	8.35277	7.55101	4.81953	4.67302	7.14537	8.47535	7.50287	6.71668	5.76683	7.7294	18.5148	6.09256	9.02368	4.09367	7.34031	5.37179	3.43096	6.69839	8.7252	9.19273
YBX3P1	0	0.0392646	0	0	0	0.199594	0.274207	0.276079	0.209509	0.297085	0.230071	0.403697	0.223267	0.11551	0.322827	0.648041	0.184322	0.659249	0.199524	0.426197	0.199198	0.292081	0.323526	0.158738	0.210772	0.161565	0.527764	0.353682	0.417678	0.768792	0.269211	0.269201	0.676619	0.341925	0.213642	0.56558	0.158942	0.102733	0.214643	0.126104	0.177543	0.370302	0.0795942	0.401811	0.277974	0.190832	0.422507	0.399038	0.266229
SEC14L5	6.65614	39.6763	6.55207	6.94378	11.1146	0.665068	0.507602	0.130671	0.246805	0.358303	2.9128	0.301943	0.239101	0.363786	0.264848	0.286276	0.211494	1.40066	1.59214	0.412411	0.156439	0.23348	0.802162	0.874872	2.87665	1.16915	0.0731427	1.75727	0.49203	0.116109	0.172725	1.56862	0.102087	0.32607	0.23533	0.562428	0.596096	1.18139	0.222288	0.260725	0.315382	0.0664718	2.31394	4.21324	0.758322	0.417491	0.0772855	0.387658	3.77975
AP003721.1	2.34207	0.396282	2.59653	1.62375	2.5853	0.579147	0.172966	0.413599	0.581484	0.249863	0.133962	0.282941	0.665759	0.18736	0.40727	0.408776	0.380514	0.103961	0.545382	0.188188	0.055845	0.230301	0.163261	0.325422	0.478629	0.356696	1.1358	0.339959	0.0752759	0.273558	0.0636805	0.403295	0.0294346	0.467311	0	0.194597	0.630194	1.68487	0.312447	0.0909084	0.348419	0.21801	0.552277	0.155974	0.350684	0.601871	0.301274	1.16701	0.152667
AP000769.1	0.498239	2.00979	0.21474	0.384663	0.780209	0.926091	2.37291	1.8935	7.22126	13.6385	1.65534	2.31246	5.3067	2.98966	2.70449	2.44603	2.49288	2.48833	4.0288	6.4661	5.33033	1.80157	5.2261	1.9436	1.55231	2.64754	2.19496	3.163	3.47164	1.61151	4.44869	3.20938	1.80426	6.94613	2.8465	2.78957	2.15722	27.4903	5.48421	3.26386	4.2569	4.58174	3.00428	1.66175	5.60297	4.76448	2.06996	1.0286	7.32604
LINC01140	0.694424	0.200707	0.670762	0.423777	0.628452	0.0518226	0.189111	0.0364005	0.108794	0.0763315	0.0488224	0.0800675	0.0658737	0.0883664	0.0720317	0.151169	0.048945	0.0534897	0.0782464	0.0968254	0.0287331	0.0236987	0.0805001	0.0708377	0.0547249	0.13109	0.0856428	0.0901902	0.0484133	0.0991647	0.0791812	0.0873691	0.0340753	0.143338	0.0504271	0.072311	0.110538	0.133367	0.11789	0.131551	0.0768287	0.0961451	0.209887	0.0451411	0.0688493	0.161029	0.0685622	0.120678	0.0589122
DLEU1-AS1	0.0234592	0.0292739	0.0511492	0	0	0.119047	0.204436	0.051458	1.62448	0	0.316672	0.133768	0.0907949	0.0984218	0.0902569	0	0	0	0.0247927	0.190652	0.0330028	0.108881	0.0643216	0.0591739	0.0314284	0.120455	0.0462913	0.527379	0	0	0.0501778	0.050176	0.10437	0	0.0289602	0.230002	0.101571	0.204247	0.0738589	0.0805864	0.147075	0.441728	0.504405	0	0.305413	0.0284551	0.0273914	0.0540918	0
SLC17A6	7.49925	0.370264	8.22422	2.46261	9.05429	0.159855	0.053132	0.0044579	0.0108255	0.191883	0.00457231	0.0347657	0.241216	4.50624	0.0729785	0.0313921	0.164507	0.2129	0.18901	0.699199	0.0914911	0.0141488	0.250753	0.11278	0.511869	1.28354	0.0160412	0.00870244	0.231234	0.00509286	0.078246	0.147793	0.0120557	0.206122	7.27575	0.0354231	0.334373	0.504289	0.36685	0.00465424	0.0203863	0.0446457	0.765992	0.0958246	0.0113394	0.231721	0.0284757	0.15464	4.98979
AC068137.1	0.0293642	0.073285	0.0320121	0	0.0324138	0.111759	0.51179	0.161026	0.703864	0.508283	0.0990955	0.0418597	0.227298	0.246392	0.301268	0.604765	0.218926	0.153806	0.310333	0.11932	0.16524	0.136288	0.161024	0.222206	0.393394	0.188469	0.376632	0.251477	0.222734	0.0735848	0.125616	0.219821	0.174189	0.0531819	0.145	0.383862	0.0847584	0.511318	0.123267	0.235366	0.110458	0.322535	0.222836	0.288445	0.0273064	0.106853	0.240003	0.203122	0.271036
EPHA10	4.9435	1.79289	5.92361	2.28712	5.04357	0.0747255	0.04583	0.156886	0.0448213	0.13572	0.0544263	0.0299878	0.464077	0.653095	0.701432	0.0758181	0.0873799	0.0550924	0.246775	0.361865	0.0917415	0.236764	0.126891	0.737561	1.02584	0.656184	0.049812	0.218438	0.143608	0.0263576	0.123736	0.159727	0.0124787	0.114297	0.350582	0.0504156	0.179124	0.192309	0.088307	0.474526	0.139797	0.0792207	0.572034	0.11985	0.0293429	0.209231	0.0491245	0.20857	1.10352
MYO5A	43.0988	9.57264	39.6572	32.4724	24.4068	6.01015	4.03292	4.67446	2.74291	3.01682	6.58862	3.0567	3.52603	10.5374	4.58885	4.98651	5.32977	13.4928	6.0379	6.13958	3.00727	7.89454	7.60783	9.99806	5.48175	5.73212	3.83645	10.4609	3.3701	4.43367	7.22275	5.85283	5.39842	5.86108	8.04223	3.31971	7.97669	2.9515	3.01797	4.9529	2.57771	2.49653	4.5473	5.02968	3.34949	3.90773	4.43845	3.45391	4.22281
AC140076.1	0.0475033	0	0	0	0.0524367	0	0	0.104199	0.126518	0.373756	0.106873	0	0	0	0.121843	0.122293	0.0505946	0.248816	0.150611	0.128686	0	0.110238	0.130247	0.299557	0.0636404	0.182935	0.0937367	0	0	0	0	0	0.140895	0	0	0.155246	0.068558	0.413587	0.0997061	0.054394	0	0.0745391	0.240326	0.093325	0.0441743	0.0576196	0.110932	0.054766	0
PEBP1P2	0.276592	0.460198	0.402044	0.218626	0.407089	1.20866	1.60691	2.73018	4.41996	1.8377	1.86683	3.32957	1.58593	1.8051	2.04949	2.29442	1.53842	1.28778	3.67017	1.45694	2.07527	1.10544	1.17969	1.27908	2.05862	1.42021	2.48638	1.51337	2.56424	2.15638	1.08462	2.0377	1.00268	1.50282	1.47962	4.21835	2.12899	2.00679	3.19301	0.844569	1.38725	1.92893	2.68202	3.44149	2.11482	1.82658	0.86121	1.16922	2.60027
RPL10AP1	0.0266698	0	0.0290747	0	0.0294396	0.169174	0.464829	0.146251	0.639279	0.755418	0.240007	0.152075	0.068814	0.111892	0.171015	0.137318	0.312459	0.419079	0.169115	0.433488	0.187598	0.340401	0.0731245	0.403634	0.214378	0.342352	0.184193	0.114201	0.708038	0.46783	0.256703	0.199651	0.316411	0.48302	0.296313	0.406746	0.0769812	0.17415	0.0839672	0.183231	0.100322	0.29294	0.168658	0.209582	0.198406	0.194097	0.155701	0.153737	0.492334
ID4	21.392	21.8283	24.9241	16.1426	18.009	62.6778	27.1598	136.718	85.5198	119.637	44.951	94.8954	110.364	112.186	57.0925	117.828	95.2349	123.621	333.119	78.2251	123.085	147.741	26.0571	83.1443	217.804	45.6512	37.0655	36.6294	107.519	48.5194	179.12	163.951	120.626	116.561	98.7057	173.79	156.205	43.9825	139.484	141.399	133.106	53.6565	104.255	142.94	21.2059	122.426	99.0735	50.894	119.457
CHEK2	0.231851	0.346149	0.29338	0.309254	0.333622	1.53898	3.04874	2.66543	2.06201	1.92844	2.43578	1.94176	1.2926	4.06022	1.46016	1.4922	2.50026	3.49142	0.573195	2.55157	2.45794	1.63335	4.05826	2.42806	2.50708	3.55549	1.58084	1.04155	1.77435	1.6652	2.34231	1.39471	1.4613	1.8446	3.2404	1.77702	1.66709	1.36076	2.13774	3.48446	1.96751	1.92297	1.15202	0.642573	2.40628	1.23538	2.00135	1.1217	3.20367
RPL12P11	0.0342289	0	0	0	0	0.0868495	0.298289	0.150163	0	0.107725	0.115513	0	0	0.143605	0.0877948	0.528716	0.0729128	0.358573	0.0723492	0	0.0963076	0.0397165	0.140776	0.215849	0.183427	0.175754	0.2364	0.0366423	0.259634	0.214439	0.146427	0.0732109	0.101523	0.185977	0	0.335592	0.0988002	0	0.0718441	0.117582	0.128757	0.161129	0.303046	0.134492	0.0636603	0.124555	0.0399663	0.118387	0.263282
FTH1P1	0.0967032	0.120672	0.0702821	0.0382184	0.106746	0.28626	3.9327	0.388885	1.45947	0.760861	0.652689	0.643317	0.499031	0.709996	0.537413	1.99163	0.411984	1.35072	0.7154	1.48448	0.317435	0.261816	0.53029	0.569159	0.604584	0.537917	1.14493	0.9662	1.22253	0.484664	0.586052	0.930755	0.764858	0.408661	0.51731	0.596958	0.60478	0.912107	0.439775	0.775114	0.444599	1.36566	0.896931	0.506621	0.869287	0.351891	0.376375	0.55744	0.842998
AC004801.1	0	0	0.0519307	0.0564784	0.105165	0.362597	1.0378	0.574685	2.15678	0.974465	0.696605	0.543246	0.245819	0.499627	0.366543	0.981062	0.608822	0.249507	0.453087	1.16139	0.67014	0.0552722	0.391825	0.360467	0.127634	0.794922	0.516984	0.509939	0.722649	0.954967	0.305667	0.20377	0.353216	0.431364	0.529248	0.674601	0.481239	0.622104	0.499916	0.272725	0.477832	0.448477	0.783229	0.374337	0.664455	0.346678	0.333719	0.219673	1.02592
BTF3P5	0.036721	0.0458227	0	0.0870758	0	0.37269	1.12002	0.362465	1.07581	1.15568	0.578305	0.471123	0.23687	0.269606	0.42384	1.13442	0.391106	0.577019	0.582124	0.447644	0.981533	0.724338	1.00683	0.879942	0.344367	0.329963	0.797063	0.27517	0.696342	0.874194	0.431991	0.510516	0.653487	0.798069	0.725308	1.4401	0.47697	0.159855	0.616598	0.294333	0.0920875	0.633822	0.0928883	0.432852	0.239033	0.222705	0.428761	0.254011	0.564901
CLLU1OS	0	0	0	0	0	0.031714	0.326769	0.0822502	2.06394	0.078674	0.0562408	0.0356357	0.0645006	0	0	0.193066	0.0798746	0	0.211352	0	0.140671	0.0580116	0	0.0315278	0.0669802	0.0320893	0	0.214085	0.0948081	0.250574	0.0267347	0.133668	1.26046	0	1.32698	0	0	0	0.0262346	0.429364	0.0626893	0	0	0.0491113	0	0.0303217	0	0	0.307649
YBX1P1	0.178632	0.26749	0.253162	0.169435	0.236621	5.55226	8.95099	9.48231	9.27731	5.11594	9.16303	7.6394	6.19924	12.4595	5.6356	6.62217	8.12396	11.3214	8.85407	7.42804	11.8112	4.80868	7.44468	7.99787	3.68544	10.5939	5.88657	3.93928	8.06205	8.70661	6.32348	5.42538	5.08631	6.34105	11.3568	21.0164	5.0788	3.38269	7.10505	7.15904	3.31496	4.42871	4.33788	5.19393	9.43526	8.12526	7.73811	2.5331	12.7508
EIF1P5	0	0	0.159787	0.434449	0.161792	0.929735	7.02508	0.884131	2.73257	1.72982	1.23658	2.29835	0.567274	0.768657	0.751883	2.26399	1.71719	1.15157	1.93627	1.48896	1.95887	0.680273	1.40655	1.10913	0.981803	0.658516	1.15689	1.09833	1.66765	1.28553	0.548632	1.09722	1.95627	1.32727	0.904698	1.99586	1.37497	2.71174	1.5382	1.00699	1.56214	2.06989	1.8538	1.58373	0.954089	0.711134	0.427845	0.422447	1.57834
NCAM2	28.9768	13.6669	30.0058	21.3949	21.227	0.726924	3.51315	6.0486	4.24028	1.94178	4.2978	3.72234	7.67201	4.4344	8.61333	9.35112	2.48469	10.4507	10.0609	5.55747	1.19186	0.227948	8.4696	6.44454	3.65997	6.01292	4.60541	9.46807	1.20298	0.77178	4.64409	4.44258	1.13501	0.926557	6.18172	1.82131	9.97657	2.85069	9.80169	4.86922	3.91303	0.812396	3.49153	5.64454	0.787831	6.56785	2.06683	1.0074	6.57004
AC012085.1	0.336249	0.251756	0.439883	0.345515	0.346425	2.78702	4.10235	3.19611	3.821	1.76374	5.27024	1.34214	1.18571	0.799403	1.06369	2.4238	1.62352	1.40898	2.53492	2.52013	2.61749	1.17047	1.38291	2.43139	1.11117	1.43877	3.14061	1.60781	3.74077	4.10074	1.5583	1.67811	1.19678	1.98935	3.2931	2.5641	3.36463	2.48842	2.14081	2.1818	1.29296	1.68838	1.81454	1.32119	4.85703	2.99095	2.17244	1.4731	2.58636
SLAMF8	0.194611	0.314274	0.47424	0.359682	0.322234	0.820562	36.3381	0.922817	8.46077	0.630495	3.155	1.89302	11.3868	0.648381	4.16949	3.24183	1.78013	3.5977	0.151231	5.52783	1.13539	2.48393	1.91466	2.90925	4.67766	3.43865	2.58084	29.0624	4.08118	3.97319	1.24879	0.924312	7.1558	1.47205	1.83011	2.44428	3.08129	5.28249	7.4727	0.832377	1.68661	2.79325	3.04057	0.854628	1.22423	0.826195	5.20628	2.85736	1.12709
RPSAP74	0.0436354	0	0	0	0.0481671	0.110716	0.380261	0	0.348648	0.274659	0.0490855	0.248815	0.168883	0.274604	0.111922	0.337006	0.418274	0.228556	0.230578	0.118207	0.429708	0.202524	0.119641	0	0.116917	0.224053	0.0861042	0.0934239	0	0.218695	0.28	0.139995	0.0647113	0.0790285	0.107735	0.19014	0	0.0949777	0.0457938	0.39972	0.164141	0.205409	0.220757	0.171452	0.16231	0.0529279	0.101899	0.15092	0.201381
JPH4	63.5927	11.8347	73.6705	61.5521	66.063	2.12352	1.07006	2.09095	0.568007	2.15597	0.665193	0.571191	4.31468	23.1348	6.0835	0.657184	3.46226	10.5106	13.8786	5.00269	6.13241	9.20099	7.12329	17.4222	11.4416	11.0958	4.3295	4.73214	4.25256	0.39273	7.39198	3.4937	6.62744	2.13024	13.3673	2.86186	12.0786	6.89976	0.729102	19.5252	1.73818	1.43999	14.2185	3.3138	0.339552	3.32372	1.66388	7.68916	12.1043
NKX2-5	0	0	0	0.00970975	0	1.82857	0.60662	2.52388	0.348981	3.10575	0.211883	2.56835	0.422611	0.343583	1.23931	0.21083	3.65467	0.943696	0.0432748	4.27062	15.9912	4.75119	0.0449084	0.1446	3.32435	2.04994	7.63558	0.499711	4.53467	2.45241	8.89849	5.95546	6.87404	0.266976	6.46017	3.27413	0.15365	3.83245	1.85642	2.55065	3.62481	1.31073	2.58947	6.00119	0.784399	2.3741	4.62808	8.85614	9.14638
RPL7AP6	0.749319	0.774753	0.60683	0.659972	0.708976	13.5261	26.6795	17.7982	28.624	23.9868	15.7504	9.39998	7.31932	10.262	7.79762	12.2908	14.7075	14.3537	20.5445	15.4272	19.9687	8.9926	10.3313	13.4736	6.88365	21.1888	17.3419	7.37979	21.0299	18.536	10.5781	10.2572	10.9219	15.122	16.4126	33.0012	8.74419	12.1159	12.8293	16.8906	7.89228	19.8203	13.0516	15.6044	11.7462	11.9714	11.099	7.18255	27.2042
AC034207.1	0	0	0	0	0	0.298339	0.867019	0.41663	0.770851	0.37005	0.345928	0.489953	0.233372	0.0758927	0.20879	0.931388	0.231198	0.568498	0.267646	0.441033	0.559864	0.335831	0.247991	0.387845	0.290813	0.255428	0.285561	0.174283	0.411635	0.430642	0.367574	0.309524	0.268265	0.589713	0.223311	0.472944	0.287177	0.314989	0.303746	0.24856	0.249501	0.539308	0.205912	0.390921	0.285968	0.175533	0.168972	0.16684	0.695698
RNU4ATAC18P	0.272202	0.67934	0.44512	0.4841	0.150235	2.76264	4.15118	0.746345	0.362484	2.57002	0.7655	1.35811	3.86287	9.42154	5.41087	1.40152	2.89915	8.55454	4.02744	3.68694	0.382937	2.68465	5.03776	4.97788	2.00568	6.11479	2.81991	0.582787	2.06471	0.852649	3.05667	3.92985	2.01837	0.985975	1.68015	0.296528	2.55351	0.29624	0.285666	1.0909	9.38598	2.34917	3.09849	0.267383	1.89844	3.79695	1.58914	1.88291	0.209372
PLEKHS1	0.00317451	0	0.0103823	0.00752766	0.00350419	0.0523557	0.608615	0.0591881	0.186006	0.0149862	0.153553	0.0271522	2.12964	0.0466146	2.69106	0.0980699	0.0676218	0.465575	0.426079	0.644976	0.111649	0.147338	2.48935	0.844783	0.0552878	0.366751	0.338264	0.319443	0.144476	0.449464	0.135801	0.108637	0.819157	0.18398	0.137162	0.0172911	0.380267	1.22302	0.556367	0.687013	0.222906	1.31505	0.00803014	0.068603	3.4716	0.458215	0.096372	0.0658774	0.0341848
RPL7P58	0	0	0	0	0	0.114806	0.0985769	0.124063	0.120509	0.178003	0.152696	0.0322507	0.116748	0.094916	0.029014	0.23297	0.0722875	0.118499	0.358644	0.122574	0	0.131253	0.0310152	0.142665	0.121236	0.0871236	0.245533	0.0484375	0.171605	0.141733	0.0483905	0.0241943	0.167754	0.0819478	0.083786	0.345037	0.130604	0.0984861	0.0712281	0.129526	0.085102	0.212997	0.057228	0	0.168305	0.137208	0.0264157	0.10433	0.139213
RN7SL4P	0.348787	0.580318	0.253492	0.620305	0.834188	1.25372	5.31914	1.02009	0.928941	6.31179	0.653918	8.20393	1.19993	5.06063	0.969165	2.69376	0.866797	127.274	1.96594	1.49602	4.49789	1.21411	0.876626	1.68625	1.32394	8.28294	1.03238	1.12014	9.2597	5.31706	1.18122	0.932508	0.517251	4.31656	1.65054	1.01322	1.09065	0.885707	1.09812	1.39783	4.66493	1.09459	3.97026	4.91079	2.81098	0.91664	2.03625	0.938263	38.5429
GRIN2B	10.0632	1.6835	10.7933	8.02828	8.45268	0.111361	0.0414144	0.00613194	0.0268034	0.0475091	0.185535	0.0135493	0.0504909	1.15172	0.20005	0.109391	0.0732444	0.34849	0.54361	0.090118	0.00550585	0.0246519	0.531172	0.0662831	0.271148	0.322246	0.041372	0.114916	0.0742157	0.0063048	0.0849074	0.14649	0.0497487	0.228846	0.645341	0.0152266	0.291293	0.0571966	0.00645431	0.0332904	0.0574856	0.0131595	0.426406	0.0713964	0.0213166	0.158691	0.00391689	0.0870182	0.415427
ESCO2	0.0172068	0.0429434	0.0328271	0.0229512	0.0189938	0.971411	0.393615	1.72911	0.360892	1.27937	1.76623	0.760394	0.582714	1.79798	0.788898	0.963467	2.45117	2.29823	0.0772856	2.02766	1.31322	0.696292	2.98108	0.577797	0.406292	1.60413	0.176134	0.0713774	0.546541	0.92706	1.10643	0.699254	0.124398	1.23874	2.59944	1.23245	0.869164	0.168537	2.027	1.34964	0.342507	0.431996	0.136018	0.232405	1.09806	0.910502	1.29084	0.545531	1.9224
AL161909.1	0.096341	0.0300551	0.105028	0.171339	0.212693	1.0389	5.24728	0.739636	4.55446	2.50144	1.08374	1.23604	0.71467	1.06101	1.11199	2.72824	1.20567	1.89233	0.94181	0.848204	0.982622	0.614825	1.08963	1.48845	0.90348	2.28789	2.04365	0.799286	2.83173	3.16869	1.5455	0.798482	1.32158	2.66088	1.10012	4.61784	0.903772	1.78243	0.733022	1.15832	0.906001	3.43916	1.49267	1.13563	1.54542	1.0225	0.703059	0.749726	4.00159
AC073367.1	0.836522	0.583336	0.804665	0.55425	0.461699	0.280921	0.107204	0.107936	0	0.116149	0.16606	0.0350733	0.0634826	0.670948	0.157766	0.190019	0.131023	0.12887	0.572047	0.0666506	0	0.0856441	0.742051	0.341332	0.164808	0.0947485	0.121374	0.0526766	0	0.0924825	0.28944	0.0789354	0.0364871	0.267359	0.0607459	0	0.0355085	0.214211	0.103282	0.169035	0	0.0386063	0.0933547	0.193345	0.160156	0.119373	0.0861828	0.0850956	0.227095
PPP1R1A	9.80602	5.49759	10.2161	7.91945	11.3378	0.382447	0.43159	0.236161	1.19286	0.779331	8.95254	0.841063	0.42225	0.966632	0.999663	0.343692	0.279795	0.496258	6.82702	0.781647	0.0545267	1.68398	1.23983	3.8346	3.17323	4.37279	0.339919	0.93587	0.457327	0.642121	0.156595	4.7299	0.721688	0.725367	0.712399	0.412846	3.02065	2.51216	0.375125	6.47966	25.3364	0.85821	4.13962	1.47215	4.68155	9.51231	0.0804546	0.660342	1.82188
FAM72D	0.0500796	0.0267825	0.0233981	0.0424118	0.0552806	0.281364	0.21821	0.2197	0.133379	0.168869	0.434582	0.132582	0.489176	0.952981	0.201851	0.165762	0.114297	0.824405	0.105853	0.387613	0.312005	0.182626	0.55905	0.24362	0.306706	0.422448	0.197641	0.145514	0.379865	0.331669	0.260142	0.114764	0.0742681	0.453499	0.538743	0.124698	0.165203	0.0934324	0.187703	0.139264	0.0986762	0.202067	0.0814371	0.140552	0.226197	0.43389	0.150361	0.148465	0.275145
EEF1DP5	0	0	0.0242164	0.0263371	0	0.0563622	0.0967892	0.170538	0.177485	0.0349549	0.199903	0.126664	0.0286576	0.0232987	0.0569756	0.343118	0.0709766	0.814454	0.11738	0.0300877	0.250001	0.0515492	0.0913583	0.0560312	0.148797	0.0570291	0.0876657	0.0475591	0.673973	0.11133	0.142539	0.0475112	0.0988272	0.0804617	0.191955	0.0725956	0.0961767	0.04835	0.116561	0.0763066	0.139264	0.139423	0.11238	0.0872806	0.0206566	0.0538878	0.129684	0.0256095	0.170861
BNC2-AS1	0.040067	0	0.13104	0.142515	0	0.0508313	1.92041	0.0878873	2.24096	0.189149	1.03664	0	0.310145	0.294173	0.719384	0	0.0426744	1.2592	0	0.379893	0.225468	0.0929812	1.31829	0.859058	0.214712	1.02866	1.58126	0.343137	1.21567	2.86155	0.128551	0.0856978	0.356517	0.0725659	0.544087	0.130943	0	0	0.714832	0.091758	0.150718	0.943059	5.27032	0.157431	0.44711	2.33279	0.093566	0.554314	0.24655
GAPDHP58	0.0852321	0	0.0929177	0.0404219	0.0188168	0.0648781	0.445654	0.243044	0.408605	0.0536485	0.268458	0.243003	0.13195	0.196672	0.131168	0.438845	0.0726229	0.267861	0.324277	0.138535	0.599529	0.0988965	0.0467386	0.0859962	0.0913487	0.0875278	0.487739	0.0729932	0.517204	0.170869	0.127614	0.236989	0.176959	0.401348	0.168349	0.297118	0.147611	0.0742072	0.143117	0.0780764	0.128245	0.106993	0.12936	0.234426	0.221925	0.206766	0.179133	0.0393052	0.262235
RPL37AP8	0.310665	0.155067	0.270943	0.221002	0.342929	1.49768	3.79021	1.49918	2.81319	1.36881	1.1183	1.32859	0.881741	0.912363	0.956199	2.8792	1.32353	0.650889	1.70728	1.59901	3.05934	0.86513	0.936974	2.19415	1.33184	1.27613	1.04214	0.798165	2.82776	1.16776	1.19609	0.863809	1.75072	1.01277	0.920432	3.04586	0.717376	3.11052	0.847683	1.77864	0.545351	2.92485	0.864433	1.34273	0.577787	0.753648	0.725476	0.501427	2.00724
PPP1R1B	44.491	23.4527	44.5906	48.3705	45.1128	1.43796	0.935247	1.18117	49.2834	7.43071	10.484	3.23693	11.5962	6.16931	10.5423	0.911264	0.926468	8.36294	42.1329	2.14222	0.49797	0.262161	7.46998	2.32713	11.361	13.7426	3.05769	5.41382	0.914022	1.56173	3.03653	6.70911	1.0778	1.58906	7.20075	2.24389	17.304	68.4642	11.828	6.30825	38.8404	34.4837	82.0949	31.4265	3.8344	12.4238	0.45727	2.83491	9.61043
CNPY1	0.0762781	0.268247	0.0680369	0.0822168	0.0841998	0.0351893	0.181289	1.80245	4.37707	0.938426	0.0546034	0.691963	0.0447305	1.34554	0.640302	1.4103	0.0369281	0.217928	0.344441	3.40949	0.526791	2.04371	13.5848	0.0437283	1.80226	1.78919	0.779952	0.348895	0.315593	1.1382	0.0964092	0.311464	0.0925531	0.150707	2.73934	3.89036	0.0500393	1.70557	4.23543	0.111163	1.60855	1.07722	0.324508	1.51218	0.0386905	4.65134	0.0242901	1.71883	1.38678
AL513175.2	0	0	0	0	0	0.245551	0.337342	0.254734	0.515496	0.121829	0.609635	0.055183	0.0998812	0	0.148934	0.398626	0.123688	0	0.245465	0.209731	0.32675	0.0898329	0.265345	0.244109	0.103721	0.0993825	0.305544	0.124319	0.146814	0.145509	0.206998	0.248388	0.22963	0.210326	0.238938	0.590379	0.335207	0	0.243751	0.0443256	0.0485382	0.0607418	0	0.152101	0.14399	0.281725	0.0451989	0.178515	0.119101
PNMA8B	30.5537	11.9511	31.584	21.3883	39.6574	1.54495	0.637832	2.13493	1.0203	0.725356	1.14917	1.54508	1.39027	2.23117	1.27817	0.76974	1.31694	3.55636	3.54175	1.19387	0.876319	0.563764	1.16566	2.11331	4.40624	2.8626	1.25068	1.68041	1.72459	0.593169	2.42157	1.19242	1.37181	1.44968	2.28386	0.366432	2.77341	1.38973	1.09825	0.96291	1.93311	0.464279	6.38943	1.51747	1.39601	1.74535	1.19644	1.8205	1.83507
LINC00622	1.45272	0.299862	1.60754	1.4375	2.08588	0.207858	0.237966	0.287509	0.029091	0.240632	0.147444	0.155707	0.479112	0.710298	0.532305	0.0843589	0.151236	1.20145	0.28859	0.384663	0.169029	0.291499	0.269536	0.247965	0.336565	0.392593	0.150874	0.0935429	0.248554	0.082115	0.478943	0.221941	0.129587	0.118694	0.296649	0.0951912	0.535976	0.190197	0.171946	0.0375214	0.205437	0.068557	0.663116	0.150212	0.192988	0.172235	0.0892751	0.100742	0.336062
MIR217HG	0	0	0	0	0	0	0.0830237	0.104488	0	0.119934	0.064302	0.0543246	0	1.09918	0.219926	0.441478	0.0608822	0	0.0201372	1.54852	0.214445	0.0884355	2.7689	0.0240312	0.663699	0.122296	0.0375989	0.0203976	0.14453	0.0238742	0.101889	0	0.0282573	0	0.399877	2.28327	0.412491	0.165894	0.0199966	2.50907	0.334482	0.0597969	0.240993	0	0.14175	0	0.0667438	0.0219673	0.0293121
AC079354.2	0	0	0	0	0	0.423814	0.485203	0.366387	0.296577	0.700914	0.501054	0.317481	0.287321	0	0.142809	0.286674	0.237203	0	0.588424	0.452488	0.313312	0.516831	0.305318	0.421326	0.447549	1.14354	0.3296	0	0	0.139524	0	0.35726	0	0	0.412401	1.21307	0.321422	0	0.116863	0.255016	0.139626	0.698925	0.281681	0.218768	0.310654	0	0.390061	0	0.856522
ASPDH	11.7956	11.5605	14.5783	8.78233	12.929	0.723877	1.3109	0.432365	1.10521	1.5672	0.420122	1.02043	1.03056	1.13164	0.904716	0.373908	0.651914	2.33658	1.30472	1.5176	0.875683	0.553725	0.753784	2.02804	2.14037	3.06294	0.757436	1.62144	1.49514	3.45764	0.643509	1.20931	0.276931	1.55949	0.42263	0.892813	1.27266	8.67107	0.348398	1.3661	2.66667	0.504638	4.40874	1.97699	1.09979	1.73653	0.314943	1.41133	3.63874
PPP1R3F	18.4596	12.9175	19.3402	15.036	19.973	1.94984	1.43247	2.3031	3.42574	1.59726	7.45182	3.09896	4.65483	5.34899	3.57847	2.65543	2.07026	2.92736	6.17145	3.25066	1.85577	2.4652	2.67602	3.2341	4.63558	4.0144	2.6922	2.1688	3.10152	7.17255	3.1116	3.37957	1.83438	2.56027	3.1656	2.17568	3.33907	4.01617	7.57744	2.8045	3.42143	2.74051	9.95852	4.29505	3.97431	5.20391	1.6554	2.44941	3.34423
AL445685.2	0	0.0625708	0	0	0	0.0636134	0	0	0.267093	0.236712	0.0564052	0.0714797	0	0	0	0.129087	0.0534054	0.262639	0.105985	0.203752	0.211623	0.116362	0	0.0632399	0.067176	0.128732	0.197889	0	0	0.18848	0.0536257	0	0.0743612	0	0.185701	0.0546236	0	0.763987	0.0526227	0	0	0	0.190258	0	0	0	0	0.115617	0.0771371
GLI2	0.375113	0.196482	0.333209	0.532602	0.250487	2.70846	0.373304	2.90016	0.690706	0.71052	2.41718	1.78906	1.26063	1.18518	1.23237	2.48577	2.38481	0.642803	0.582418	1.72185	0.76877	2.08491	3.08233	1.06592	0.970959	0.211037	0.99607	1.06835	0.886967	1.07927	0.752816	1.88445	0.422371	5.30497	0.714621	0.396025	0.558083	0.4284	3.30487	0.654894	1.8872	0.886538	1.36767	1.14181	2.19415	6.46545	2.32242	2.47999	0.641177
S100A11P2	0	0	0.05992	0.0651673	0.060672	0.20919	1.43695	0.120563	0.439163	0.259473	0.247315	0.0783528	0.141818	0.115299	0.211467	0.848996	0.117081	0	0.116176	0.521135	0.309296	0.0637756	0.0753511	0.277283	0.14727	0.211666	0.542291	0.235356	0.625369	0.413207	0.411474	0.293899	0.163023	0.0995455	0.203557	0.479007	0.396626	0.239271	0.288413	0.125873	0.275672	0.517473	0.486621	0.647891	0.255559	0	0.0641767	0.126734	0.169108
LINC01608	0.570103	7.51249	0.248604	1.62225	1.03207	0.115722	0.695544	0	0.121471	0.215307	0.359133	0.0325081	0	0	0.116982	0.0587072	0	0.47778	0.120502	0.15444	0	0.0264601	0.125051	0.201325	0.336059	0.995279	0.0224993	0.341768	0.172974	0	0.0243883	0.390198	0	0	0.056303	0.546527	0.065823	0.694903	0	0.026112	0.0285937	0	0.490319	1.07522	0.042412	0.0276605	0	0.0262906	0.771781
IGFBP3	2.47232	1.32955	5.46823	4.73276	2.83262	145.013	57.8677	73.203	83.2424	12.7045	30.4784	248.819	90.8664	86.962	105.816	605.948	144.303	40.5194	4.17105	128.827	149.944	41.3239	172.215	20.3174	4.41792	14.9436	44.7546	44.772	148.602	8.83726	95.1866	40.9114	73.0454	192.478	87.2131	66.7434	54.334	183.61	24.391	13.8841	105.061	35.5387	14.0073	40.7512	7.46236	40.4046	143.697	303.496	15.1267
AC060766.6	0.0435246	0	0	0.0516046	0.0480448	0.110436	0	0.0477357	0.115921	0.410942	0.0979218	0	0.168455	0.182605	0.558187	1.5687	0.139071	0.227976	0.0919973	0.353722	0.0612311	0.151507	0	0.0548935	0.233241	0.0558711	0.128829	0.512528	0	0.0545349	0.325838	0.139639	0.387282	0	0	0.0948288	0	0.189473	0.0456776	0.149514	0.0545747	0.273184	0.110099	0.0855084	0.0404744	0.263968	0.0508201	0.200716	0
AC020911.1	0.118676	0.0740457	0.0646887	0	0	0.338758	0.129276	0.260317	0.158038	0.32681	0.0333747	0.211471	0.114829	0.373424	0.68489	0	0.315997	0.155402	0.219488	0.241118	0.0834777	0.516384	0.650783	0.411606	0.158991	0.304681	0.11709	0.254087	0.33757	0.148697	0.602872	0.28556	0.351994	0.429871	0.146505	0.0646411	0.0856383	0.193735	0.0934098	0.271782	0.372014	0.186219	0.1501	0.174863	0.248308	0.215924	0.311779	0.444666	0
AL390334.1	0	0.0128447	0	0	0	0.0391761	0.0448507	0.0677355	0.0548295	0.129581	0.127369	0.719002	0.0265591	0.0323888	0.0396025	0.0264993	0	0.0539152	0.0326353	0.139422	0.463386	0.561348	0.0705568	0.0649101	0	0	0	0	0.975966	0.0515889	0.0330252	0.05504	0.137385	0.31692	0	0.515809	0	0.694546	0	0.0235729	0	0.0161516	0.0260377	1.92112	0.00957198	0.16231	0.0240374	0	0
AC008481.1	0.0866096	0.0540384	0.141629	0.154032	0.143406	0.439511	2.07559	0.474946	0.80735	1.2266	0.53585	0.370395	0.335207	1.36262	0.388758	0.557422	0.553474	0.45365	1.14416	0.938494	0.913828	0.401979	0.771777	0.764628	0.522141	0.611479	0.555438	0.139074	2.46358	0.596854	0.648384	0.231557	0.64221	0.784298	0.320757	1.36807	0.499989	0.848324	0.409022	0.991729	0.760187	0.543608	0.547712	0.510459	0.36243	0.630324	0.455071	0.44933	0.732802
MFSD4A	32.621	6.37172	39.3855	17.6985	34.6684	1.52929	0.361347	0.883548	1.99573	3.7192	0.826264	0.71776	1.43288	1.26745	1.10153	1.0751	1.08515	0.961831	2.72322	1.39607	1.7375	0.656393	0.962307	0.948795	4.33296	2.95411	0.958479	0.922646	1.38164	0.645716	1.08013	1.72941	0.162516	1.69506	0.844604	0.690465	2.21848	3.88734	0.721122	0.732543	0.471642	1.96586	3.39763	1.93763	1.26694	2.59739	0.287033	2.19217	2.25992
AL356157.2	1.23594	1.73507	2.18951	2.19808	2.04645	0	0	0.16944	0	0	0.173789	0	0	0	0	0	0.329093	0	0	0	0.217343	0.179261	0	0	0.206975	0.198317	0	0	0	0	0	0.330438	0	0	0.38144	0.336599	0.222968	0	0	0	0	0	0	0.303517	0.287332	0.187393	0.180389	0	0.475331
MGAM	0.0477813	0.0278247	0.0243086	0.064205	0.0334042	0.117195	0.249834	0.0419234	0.41571	0.110277	0.0985402	0.0454092	0.0945194	0.0551274	0.841548	0.28292	0.128923	0.17519	0.198623	0.192	0.0246471	0.19959	0.157211	0.321398	0.0768154	0.0633798	3.47441	5.10479	0.259743	0.183596	0.231656	0.13456	0.314144	0.0951909	0.0963432	0.1683	0.160905	0.0242671	0.108647	0.0765971	0.151777	0.0749752	0.0725196	0.197129	0.0992331	0.226031	0.169231	0.179949	0.0490032
KCTD16	7.533	1.36234	7.35952	4.42945	5.67863	0.229825	0.0261373	0.0368421	0.0415383	0.154805	0.130907	0.0393353	0.273954	0.429091	0.156936	0.083391	0.14439	2.1114	0.621275	0.261625	0.052321	0.0737787	0.172695	0.558329	0.438782	0.428129	0.0828574	0.218331	0.204752	0.102218	0.0744172	0.138565	0.0551544	0.271602	0.413209	0.0653466	1.23799	0.37603	0.0705072	1.84905	0.0992837	0.0357677	0.565982	0.148488	0.128298	0.323055	0.0280161	0.18534	0.23439
AC093816.1	0.0187828	0	0.040953	0.0222697	0	0.0953156	0.327366	0.164801	0.150075	0.236453	0.147902	0.0535511	0.0242319	0.0591016	0.0240883	0.290128	0.160041	0	0.0794018	0.0254411	0.13212	0.0435881	0.257498	0.071067	0.0251634	0.0241109	0.296508	0.0201071	0.498651	0.353014	0.140613	0.160695	0.0835647	0.374195	0.115936	0.265998	0.108431	0.0408831	0.335102	0.129044	0	0.117891	0.0475124	0.221404	0.122265	0.0683483	0.219311	0.129927	0.317842
SDHDP6	0	0.222909	0.19474	0.169435	0.0394368	0.407921	1.71236	0.744479	1.33213	1.01195	0.843963	0.356505	0.645274	0.56208	0.595633	0.0919746	0.418565	0.935653	1.28375	0.338738	0.653387	1.24362	0.881607	0.675876	0.382903	0.50447	1.12797	0.611927	0.677483	0.22382	0.382083	0.49669	1.05965	0.452932	0.176416	0.58379	0.876543	0.699867	1.83719	0.654541	1.61268	1.23331	1.17484	0.421129	0.465118	0.866695	0.709153	0.659018	0.494642
MGAT3	30.9066	30.5557	32.2821	42.546	30.7065	2.55951	1.82113	6.35546	1.76599	1.16703	3.30171	6.82716	3.10145	8.43461	2.88963	3.22796	6.29238	8.67446	8.27629	2.57093	3.20076	3.50776	6.91457	7.43526	4.16373	4.02184	8.12334	7.13522	3.42056	2.9216	6.14694	3.94882	2.73563	6.01016	8.23986	1.92393	9.61496	2.4761	0.550759	5.85812	2.36026	0.591723	4.87286	4.75381	1.34425	1.90206	6.97159	5.5214	10.4856
DDX12P	0.0640094	0.130704	0.0570938	0.0965901	0.115621	0.893265	0.481746	0.848812	0.371955	0.466999	0.700405	1.07838	0.457939	6.31086	1.37314	0.629185	1.44407	5.12053	0.479685	2.0808	0.425688	0.708954	3.90895	1.9375	0.647051	1.41925	0.264098	0.149504	0.617942	0.459337	2.15325	1.70511	0.207111	1.78108	1.62348	0.418379	0.78943	0.0886609	0.909924	1.37927	0.569118	0.21914	0.154556	0.525876	0.692638	0.56466	1.29773	0.57024	0.734046
AL023803.2	0.0268788	0.0335411	0	0.0318687	0.0296703	0.1364	0	0.206356	0	0.296076	0.211652	0.268217	0.10403	0.592035	0.137885	0.276789	0.114512	1.68945	0	0.436885	0.302509	0.0935642	0.552732	0.271198	1.15231	0.724573	0.0265196	0	0	0.134713	0.373699	0.201215	0.0398613	0	0.398181	0.117124	0.155169	0.0585051	0.253876	0	0.404434	0.0421765	0.16998	0	0.224957	0.0326029	0.0627684	0.123953	0.578891
AC097358.2	0	0.036927	0	0.0350858	0	0.0938559	0.128941	0.113594	0.236443	0.279398	0.149798	0.126554	0.343595	0.263824	0.20873	0.114274	0.141831	0.387501	0.0469115	0.180371	0.228969	0.120178	0.121706	0.279914	0.0792897	0.2849	0.116787	0.047518	0	0.241008	0.142416	0.0949404	0.109713	0.61634	0.12786	0.193421	0.427083	0.515289	0.093168	0.169424	0.315394	0.0696513	0.33685	0.0581369	0.467813	0.251259	0.155486	0.119408	0.136571
OSTCP5	0	0	0	0	0	0.048026	0.824738	0.166074	0.30247	0.05957	0.298089	0.10793	0.0488382	0.0794109	0.0485488	0.194913	0.0806386	0.198284	0	0.256377	0	0.0878498	0.0518974	0.047744	0	0.145783	0.0373498	0	0.287145	0.0948643	0	0.0404842	0.168421	0.137122	0.0467328	0.206195	0.218538	0	0.119185	0	0.0474667	0.297005	0.0478795	0	0	0.0459176	0.0884024	0.0436436	0.174708
EEF1A1P3	0.0123817	0.0309014	0.0269965	0.0293606	0.0546705	0.84824	2.75147	0.678985	1.7148	1.44181	0.612842	0.776626	0.287528	0.441548	0.476374	1.43441	0.88356	0.907955	0.85056	0.855317	1.49802	0.574671	0.54318	0.843259	0.331757	0.969536	0.708542	0.490425	1.92532	0.744668	0.768029	0.688552	0.789571	1.12123	0.764258	1.48371	0.50035	0.75461	0.80564	0.864845	0.38813	1.43772	0.610749	1.36221	0.379963	0.525649	0.621657	0.485342	1.44762
IGSF9	0.0776193	0.193717	0.0423092	0.0705553	0.108528	0.0393889	0.101462	0.269576	0.206727	0.0651423	0.305599	0.21761	0.971333	1.26731	0.394858	0.119895	0.206676	0.772464	0.396485	0.949716	0.181994	0.915644	0.500127	0.342629	0.675916	0.654286	0.148058	0.0720131	0.127565	0.735892	0.539574	0.412275	0.0920876	0.524822	1.3319	0.183205	0.519037	0.0450528	0.13848	0.24886	0.775359	0.0974361	0.418866	0.132159	0.255035	1.18628	0.262826	0.146161	0.91943
RPL31P63	0.13719	0.171194	0.348974	0.108438	0.302874	0.812216	4.98142	1.80556	6.33331	2.87842	1.64613	1.95568	0.943944	1.15114	1.52482	3.29637	0.925409	2.15574	1.9815	1.48657	3.66701	1.16735	0.940381	2.19164	1.40908	3.34601	2.16569	1.12594	4.33589	1.43245	1.02704	0.489049	1.49198	1.98772	1.24197	3.78607	0.857981	2.09027	1.72771	1.09963	0.974777	3.58781	1.85083	2.15618	0.978077	1.0539	0.480555	1.10715	3.3064
HOXD8	0	0	0	0.0309353	0	0.148956	0.426329	0.894251	0.712282	1.53967	0.132077	0.60441	1.61573	3.96129	0.786346	2.26701	0.152842	8.67819	7.83122	1.89073	0.339531	1.61969	1.94944	11.5256	1.54676	2.31939	2.59359	0.181553	0.890598	0.678357	0.592963	0.572014	0.386938	0.0826959	1.92454	1.18668	9.32929	10.2509	4.99725	14.2585	1.70122	2.31318	8.39856	0.192223	0.0727893	0.308568	0.190406	0.804659	1.24429
AP000781.1	0.110281	0.137616	0	0.130754	0.182601	0.629589	0.720784	0.483804	1.02801	0.173538	0.868387	0.707442	0.640235	1.04102	0.353579	0.567817	0.528559	0.866456	0.291374	0.448124	0.31029	0.95971	0.90712	0.556348	0.295488	0.283128	0.272017	0.295142	0.62738	0.345446	0.825595	0.412782	0.327094	0.599194	0.408423	0.901026	0.557062	0.24004	1.15736	0.505112	0.345698	0.0865229	0.418445	0.541645	0.769144	0.936365	0.321915	0.381425	0.84826
CAPN6	0.019225	0	0.00523964	0	0	0.0487798	0.0418841	0.637823	0.947252	0.0378156	5.59038	0.0274059	0.074407	0.18652	0.0493107	0.259839	0.0409521	0	0.137145	0.0911402	0.040569	0.0724983	0.0593009	0.054555	0.0772675	0.104884	0.11855	0.0360159	0.0546847	0.270993	0.344389	1.02799	0.135426	0.452642	0.0474662	0.104716	0.0554921	0.104614	0.110968	0.0825514	0.0241059	0.105583	0.00607887	0.0566541	0.147491	1.13098	0.0617305	0.0720339	0.0517562
D21S2088E	0.15906	0.074432	0.0975393	0.106081	0.120711	1.3621	0.606434	0.305287	1.29738	0.21901	0.123012	1.07704	0.423236	0.698609	0.446226	0.358301	1.1647	0.260356	0.619875	0.323169	0.685291	1.78794	0.84498	0.927812	0.213094	0.421123	0.617929	0.0851376	2.63924	0.0373683	0.446539	0.520943	0.265373	0.0360095	0.45408	1.84105	0.0860851	0.497683	0.417321	0.432566	0.835167	0.436777	0.515517	0.332021	0.101691	0.66321	0.812533	0.641826	0.290572
FUNDC2P1	0.210598	0.337882	0.524773	0.249694	0.232469	1.25955	2.49071	1.68281	6.08972	3.31397	2.40286	1.58685	1.00915	1.23066	0.578752	1.47159	1.47399	1.26067	1.90773	2.40427	4.82501	1.22181	1.44357	1.44187	1.00764	2.66476	1.30607	0.547513	3.19487	1.99789	0.804386	1.06175	1.0708	1.25323	1.41133	4.26064	1.04208	4.19102	3.22051	1.75693	1.47122	3.02132	4.29983	1.30033	1.17504	1.4597	1.15923	0.693703	3.10091
LINC02014	0.0240515	0	0	0	0.0265493	0.030513	0	0.105514	0.128115	0.113542	0.0811666	0.102859	0.155145	0.176586	0.277606	0.123837	0	0	0.0762558	0.13031	0.067672	0.0558148	0.0659454	0.151669	0.0966656	0.0308741	0.07119	0.0257473	0	0.150678	0.205778	0.180049	0.0713367	0.17424	0.0593827	0.104804	0.0694234	0.157053	0.0504824	0.660967	0.180946	0.07548	0.18252	0.094503	0.0223659	0.204214	0.0280829	0.249558	0
PABPC1L2A	2.29211	0.573962	1.98066	1.63603	2.5217	0.0972543	0.0334025	0	0.0408341	0.0120631	0.0172468	0.0437122	0.00988989	0.104526	0	0.0394706	0.0898127	1.00383	0.259254	0.0103834	0.0215691	0	0.0315282	0.029005	0.133511	0.275534	0.0302539	0.0902708	0.203517	0.00960517	0.016397	0.0491891	0.0113686	0.0694193	0.0378542	0.0751593	0.387229	0.133487	0	0.00877793	0.00961217	0.0120289	0.872618	0.090363	0	0.0836862	0	0.0441899	0.0589649
AQP7P1	0.0164102	0	0.01789	0	0.0181145	0.104095	0	0	0.0437061	0.180762	0.0184599	0.608227	0.084684	0.378665	2.65174	0	0.0174781	0.687638	0.121401	0.244503	0.323206	1.27576	0.0674915	0.848564	0.131909	0.0421306	0.113336	0.0351346	0.0622377	0.452353	0.193053	0.228145	0.0730092	0.267487	0.162067	0.0893841	3.29203	1.143	0.137776	0.507347	0.164612	0.0514997	0	0	0.076301	0.0597149	0.0766436	1.02164	0.126224
HECW2	4.39662	4.55736	4.18621	3.92643	3.83306	0.740506	0.741797	0.963215	0.514594	0.161588	1.69317	0.364033	0.65367	0.993428	1.59244	0.594806	0.53965	1.79051	1.03812	0.982768	0.153965	2.09139	1.23549	1.94093	0.389178	0.558482	0.967818	1.15713	1.25034	0.20146	1.55482	0.973897	0.603127	0.151718	0.630494	0.415074	1.6263	0.564658	0.249564	0.798321	0.628538	0.67844	0.71774	0.597252	0.379449	0.463803	0.872423	1.20256	0.904167
GCSHP5	0.131408	1.47581	0.179071	0.194753	0.217582	1.5004	2.86288	3.02656	3.41235	2.11953	3.76943	2.95039	1.22909	1.92959	0.800497	2.79095	2.16936	2.23696	4.54823	0.800956	2.31083	1.90594	1.8015	1.24299	1.76048	1.72901	2.59302	0.562691	2.86568	1.68766	1.51077	1.37018	0.925669	1.72546	1.50055	4.4377	1.56462	1.28711	1.65489	1.88086	1.81246	2.11351	1.08032	2.8398	1.64968	2.0721	1.18911	1.43924	2.22368
NRM	0.922424	1.82076	0.859332	1.2428	1.12004	14.6386	8.36732	16.4627	5.36015	8.77514	11.3574	15.9587	11.1646	21.9269	10.0983	13.104	17.6216	19.414	7.66592	14.0843	19.0995	11.1896	14.6345	10.6712	8.45945	8.75147	7.7358	7.51368	11.8946	15.004	16.089	11.2637	8.22017	18.0274	15.6005	8.78796	9.0042	3.68699	9.10849	14.3647	12.9856	6.75018	7.62576	7.44647	12.4144	19.2648	16.2633	8.79765	15.5834
HOXA-AS2	0.00649449	0	0	0	0	0.0329571	0.183938	0.812005	4.454	0.909556	0.818234	0.430503	0.0167572	2.00267	0.757934	0.167195	0.0207513	0.510259	0.0446137	0.93685	0.118775	0.180857	0.618789	0.630699	1.60963	2.09253	2.26512	0.0590954	0.357151	0.142404	0.0555652	0.295179	0.317834	0.0176434	1.05028	0.258234	0.0421786	0.749211	1.9493	0.219378	1.9829	1.16684	1.98782	0.0127591	0.144945	2.80441	0.0227492	0.853566	0.0499543
AC126768.2	0.347609	0.144589	0.463166	0.457933	0.490295	0	0	0	0	0.212721	0	0	0	0.0607655	0.0247664	0	0.0822732	0.60691	0.0204093	0.418518	0.326014	0	0	0.0730677	0.0776155	0.0247897	0.0190535	0.103366	0	0	0.0206531	0	0	0	0.0953601	0.0420749	0.55742	0.126102	0.0608005	0	0	0	0.366375	0.0758791	0	0.0702726	0.0225486	0.0222641	0
KCNK9	3.7196	0.793632	3.69783	7.46748	3.1826	0.308073	0.0671803	0.0338195	0.0205318	0.151636	0.0390234	0.0989052	0.0795637	1.35031	0.21256	0.664847	0.385902	0.827766	0.423655	0.219277	0.113874	0.0626145	0.158527	0.209037	0.340817	0.133593	0.0456358	0.0618941	0.233898	0.0193183	0.280315	0.263816	0.0914598	0.230371	0.166543	0.0461888	1.49086	0.87254	0.00809034	0.688526	0.0579971	0.00604824	0.945773	0.166596	0.0573501	0.836889	0.0450059	0.133315	0.106733
EIF4EBP1	2.2215	2.69235	2.29986	3.58135	3.49308	27.3519	48.7464	41.6999	36.1808	45.646	34.1765	48.3681	25.0309	49.417	32.4457	27.7724	40.6827	67.9739	17.3127	54.3135	90.1598	20.2132	55.1039	26.6269	31.71	48.2732	30.0703	21.5401	30.9735	52.5454	25.758	20.9714	43.9897	23.793	63.0955	41.0883	30.2391	23.1332	23.4313	60.6289	28.0153	28.2628	26.5003	20.2833	54.5584	40.9229	40.1396	31.4707	69.4065
RPL30P14	0	0.061492	0	0	0.108791	0.56265	1.2883	0.648548	1.57493	0.930524	0.277164	0.421484	0.317869	0.0516856	0.315985	1.26862	0.314908	0.258111	0.624947	0.533971	0.485274	0.343069	0.202668	0.497196	0.264071	0.759077	0.486192	0.211009	0.373784	0.308718	0.105402	0.421594	0.438475	0.624734	0.425832	0.966273	0.284477	0.643556	0.310292	0.846389	0.308943	0.618589	0.436281	0.484056	0.366596	0.418404	0.0575377	0.340871	0.682264
HLA-DRB1	31.7724	54.9586	40.5442	37.0314	41.503	148.954	882.903	116.165	468.673	216.689	149.413	165.18	905.477	41.8905	329.214	229.88	201.92	220.01	91.757	294.248	87.9158	234.046	128.022	241.093	349.546	329.54	610.684	786.274	414.32	212.627	100.743	249.789	392.024	64.6649	52.2917	145.668	271.143	1173.57	454.948	71.7385	158.877	570.487	133.962	85.1301	119.883	38.6982	460.67	149.871	163.909
METTL11B	0	0	0	0	0.0314446	0	0.0620609	0.0156212	0.113803	0.0672389	0.160221	0	0.588005	1.10549	0.0730651	0.0366676	0	0.373018	0.0602109	0.733101	0.0200374	0	0.370997	0.035927	0.0954078	0.146267	0.0421582	0	0.216074	0.0356923	0.0152325	0	0.0211225	0.0515917	0.439575	0.186192	0.020556	0.0310019	0.328848	0.652366	0.0357183	0.0893974	0.0900723	0.083946	0.0264899	0.13821	0	0.131366	0.63542
AL591846.1	0.514857	0.0988416	0.0431756	1.45565	0.699479	3.01466	97.1549	4.12644	11.9193	6.6684	2.3612	25.6317	1.48172	31.2792	1.57453	5.0979	45.5562	5.18607	3.51587	68.0739	87.3628	1.74624	34.5313	2.59736	2.17539	5.99899	3.08693	25.7772	7.96082	5.06155	2.24485	25.2854	2.34933	46.408	3.27572	52.2472	2.97222	68.8768	53.409	60.4052	2.48296	7.70593	2.95537	40.9263	59.3314	35.2603	35.052	24.5191	142.14
UBA52P6	0.0448919	0.0560189	0.0978798	0.0532257	0.198216	1.196	1.36924	1.32935	3.46732	0.494493	1.41397	1.15191	0.63707	0.941706	0.172717	2.08026	0.765011	0.235138	0.853986	0.912084	1.57886	0.52089	0.800062	0.962504	0.721703	1.21015	1.19588	0.720856	2.04309	2.13743	0.960209	0.480087	1.86409	3.33347	1.33005	1.51602	0.77747	1.17255	1.03647	0.616845	0.844336	0.845297	1.19235	0.529167	2.71348	1.52466	0.419333	0.77633	1.17402
OSTCP2	0	0	0.042106	0	0	0.195998	0.673165	0.12708	0.514335	0.668552	0.130342	0.0550587	0	0.0810206	0.148599	0.099432	0	0.202303	0.0816373	0	0.0543357	0.0896306	0.105899	0.0487118	0.103487	0.198317	0.114321	0.0826928	0.292966	0.193574	0.123919	0.0413048	0.0572782	0.139902	0	0.25245	0.111484	0.420341	0.283736	0.176903	0.0484289	0.181815	0.04885	0.0758791	0	0.0468484	0	0.0890565	0.118833
RELN	11.2087	1.35247	6.29231	3.94678	8.22202	0.182417	0.0827478	0.038681	0.516629	0.230533	0.204472	0.0386744	0.283502	0.182114	0.269645	0.0558745	0.140142	0.0497357	0.563402	0.216807	0.0133583	0.0188875	0.126455	0.128311	0.405256	0.402235	0.0240904	0.103101	0.118326	0.0220952	0.0623809	0.359765	0.0362101	0.18917	0.174155	0.0783189	0.22318	0.528508	1.82076	0.335503	0.35038	0.0957829	0.615923	0.186547	0.170292	0.998735	0.0300933	0.142313	0.179462
NRIP3	26.0911	8.46522	23.5649	34.293	20.858	2.41145	2.08415	0.784612	1.67272	2.95181	1.60014	1.07911	3.09077	2.51716	0.666765	2.06658	2.98135	4.61858	4.25064	1.86475	1.17612	0.579131	1.397	2.86415	2.30132	4.92802	0.586827	1.20218	3.02871	0.453395	1.64584	2.49536	0.943736	2.76458	2.72647	0.946977	3.85979	16.0151	0.205156	1.94791	0.672766	0.600435	7.74885	1.47084	0.769691	2.05837	1.6172	2.45513	1.32448
AC133435.1	0.0893161	0.148606	0.09737	0.070598	0.065728	0.944262	3.11339	1.11019	1.82374	2.34246	0.870756	0.933704	1.03705	1.8736	1.0309	2.45266	1.30009	2.9629	1.91933	1.20978	1.34028	1.13999	0.857118	1.95253	1.27634	2.02552	1.4687	0.669295	1.69371	0.484944	1.05073	1.27356	1.14795	1.50977	1.28637	2.43246	0.945292	1.55526	1.09356	1.26136	1.15725	1.86865	1.092	1.40376	0.968997	0.686133	1.1124	1.16701	1.87781
FAM111B	0.0266353	0.0664744	0.0629137	0.0210533	0.0147007	1.59944	0.947798	3.6272	1.00497	1.21549	3.85013	1.51878	2.42828	7.10989	1.22972	2.74281	2.44916	5.58049	0.136055	5.81445	0.974245	1.57618	4.9782	1.98196	1.92096	1.62976	0.766479	0.223354	1.22904	3.81567	2.36905	2.05564	0.658336	14.6648	3.61692	1.3589	1.70421	0.280212	5.67908	1.79944	1.16335	0.47367	0.415484	0.566884	4.76385	7.6892	1.90746	1.3409	2.30141
OLFML2A	1.37017	0.466304	1.03092	0.648003	1.1112	5.44701	2.00483	8.39189	1.84154	2.08409	6.75714	3.56943	2.71873	3.11952	10.8366	4.97366	3.11902	3.78145	1.51521	4.47614	0.897626	5.90804	4.86152	5.34449	2.80962	1.39337	3.8198	1.64366	9.61211	3.39851	8.34897	6.8888	5.39468	1.20163	3.74067	2.48124	7.62735	1.63779	1.65137	2.58479	5.01065	3.00757	3.01903	2.14248	3.21728	5.40522	5.0043	5.75591	2.74133
AC016304.1	0	0	0.0452664	0.0492305	0	0.158032	0.180923	0.0910793	0.331765	0.130679	0.0467084	0.118383	0	0.043551	0.0532508	0.213791	0.176897	0.217488	0.131648	0.224966	0.292071	0.192717	0	0.314209	0.111255	0.0533008	0.122902	0.0888998	0.472434	0.156078	0.13322	0.0888103	0.0615776	0.150403	0	0.407098	0.179778	0.361513	0.0435762	0.142636	0.208256	0.065154	0	0	0.115837	0	0.0969643	0	0.255505
CDH9	5.24294	0.997917	4.99513	3.35726	4.79209	0.134583	0.0177781	0.0134246	0.0326002	0.0898865	0.00458972	0.00581634	0.0842206	0.128384	0	0.0210078	0.0825668	0.0641132	0.245786	0.0552646	0	0.00946847	0.0391546	0.0617503	0.180383	0.340438	0.0120767	0.0393101	0.0618971	0.00511224	0.0436355	0.157082	0	0.125622	0.0402949	0.0400027	0.0824393	0.346353	0.0171277	0.0140159	0.0306958	0.0320112	0.56249	0.0240473	0	0.0791841	0.00476401	0.13171	1.16746
LINC01515	0.0409725	0.0553887	0.014889	0.0141688	0.0263828	0.277227	0.0520706	0.299578	0.281904	0.30088	0.499308	0.111948	0.193816	0.159363	0.137933	0.24612	0.238195	0.0447101	0.0451057	0.00924947	0.321827	0.0138662	0.0561701	0.019378	0.157812	0.0525951	0.139803	0.104171	0.148918	0.186097	0.0219094	0.0109543	0.270898	0.494705	0.0864079	0.23247	0.017247	0.282409	0.161247	0.0527803	0.087765	0.211626	0.0129553	0.22136	0.204794	0.213287	0.145514	0.265707	0.0472729
SCNN1B	0.0218845	0.0218471	0.00954316	0.0155683	0	0.105503	0.74378	1.06088	1.38721	0.0826499	3.09693	1.0919	0.214574	0.174449	0.437831	6.73823	0.559407	0.710695	0.0185028	1.23312	1.29923	0.025393	0.0660043	0.30913	0.0879563	0.202265	2.05124	0.360784	1.47739	17.5108	4.72309	1.12339	3.23898	15.4498	0.46468	1.3732	0.467448	0.81931	0.0551209	0.050118	0.214036	0.405209	1.48914	0.0687909	4.01725	0.042472	0.991447	0.53993	0.0740658
RPS2P48	0	0	0.0423924	0.0461048	0	0.419329	1.69436	0.511779	0.880317	0.397741	0.568657	0.942365	0.376253	0.448645	0.548568	1.40152	0.890453	0.814718	0.657541	0.4477	1.0394	0.293281	0.319858	0.907299	0.182335	0.673874	0.517943	0.208138	0.737397	0.755204	0.436667	0.415858	0.692014	0.915548	0.624057	0.762501	0.336727	0.67712	0.326475	0.823742	0.268171	0.579664	0.295094	0.534767	0.45201	0.589588	0.703761	0.381065	0.837488
CDC6	0.555993	0.200618	0.774092	0.615526	0.521305	2.49002	0.831858	4.9738	0.954493	2.0397	4.34415	2.35866	1.70681	4.94631	1.84274	1.68141	4.25224	5.19287	0.389371	5.23078	1.96958	2.15302	3.99938	2.37402	1.65576	2.96663	1.05747	0.441018	2.10867	3.50419	3.51397	1.97721	0.750031	7.27927	5.35037	2.55043	1.78853	0.670706	4.67148	3.08734	2.713	1.00907	0.71592	0.763297	4.22656	2.42539	2.72972	1.8419	2.90602
SUMO2P3	0	0	0	0	0.197184	0.377705	1.55669	0.848967	1.26869	0.562192	0.937737	0.594175	0.614547	0.749441	0.152726	1.53291	0.57077	0.623768	0.692216	0.806519	0.67014	0.552722	0.408152	0.750974	0.877487	0.687913	0.587482	0.127485	0.451655	0.746068	0.254722	0.445747	0.529824	0.754887	0.44104	2.14056	0.429678	0.648025	0.749873	0.749995	1.26924	0.280298	0.828415	0.350941	0.276856	0.722246	0.347624	0.137295	1.4656
SHISAL2B	0	0	0.0277375	0.0452497	0.0280855	0.0322786	0.110863	0.0139524	0.16941	0.100094	0.028621	0.0362701	0.0492367	0.133432	0.0489449	0.0982518	0.0135494	0.533072	0.134447	0.172313	0.0536908	0.0590445	0.156963	0	0.0340864	0.408257	0.0251031	0.0272371	0.0964961	0.0318795	0.040816	0.0408145	0.0565984	0.0921608	0.109933	0.027717	0.128521	0.0830703	0.0801052	0.101969	0	0.0598856	0.0160901	0.0249928	0.0473202	0.324046	0.014854	0	1.27208
AL357992.1	0.263826	0.164609	0	0.469205	0.145613	0.836761	9.19647	0.578704	4.91862	3.32125	1.78067	0.752187	3.40365	0.276717	4.90604	2.03759	0.561989	6.21849	0.139411	1.96542	0.185577	0.765307	1.80842	1.16459	1.59052	2.03199	1.5618	1.55335	1.00059	1.48754	0.282154	1.83393	0.978136	0.955637	0.488537	3.01774	6.8537	2.00987	2.21501	0.302096	2.15024	5.58871	4.33788	1.55494	2.20803	0.960031	1.07817	0.912486	0.20293
AC092720.2	3.16195	0.578357	4.40148	2.19808	4.52493	0.274397	0	0.0338881	0.192018	0.0810366	0.0115859	0.102776	0.05315	0.583348	0.0132088	0.132576	0.0329093	0.269738	0.468054	0.167407	0.0144895	0.047803	0.282397	0.220827	1.6696	0.661058	0.0101619	0.23154	0.234373	0	0.0440601	0.198263	0	0.205189	0.356011	0.02244	0.16351	0.470781	0.021618	0.283045	0	0.0161613	1.22451	0.0809377	0.0287332	0.0749574	0.0120259	0.22561	0.396109
AL353678.1	0.0231426	0.0288788	0.0252295	0.0274389	0	0.2936	0.907546	0.228436	0.98619	0.473425	0.338431	0.0989719	0.119426	0.121367	0.178078	0.297893	0.147892	0.121218	0.171207	0.188079	0.423247	0.214823	0.285541	0.437815	0.155022	0.445612	0.114167	0.0743231	1.2288	0.463952	0.222753	0.222745	0.377526	0.544881	0.257125	0.327742	0.501001	0.755592	0.170012	0.344495	0.203127	0.689964	0.117082	0.318262	0.215208	0.0561422	0.135109	0.186766	0.747636
PABPC1L	0.973732	1.29237	0.577656	0.705753	1.12803	18.674	4.52766	3.29817	1.677	5.58221	4.32335	14.548	2.68112	18.8274	6.41156	7.67981	11.9834	10.2546	1.9818	9.69842	3.65458	24.1778	8.91041	8.93068	2.5491	2.1068	3.77158	2.15108	8.71702	3.61274	23.4402	14.082	2.25026	10.2136	2.51457	2.96487	2.21474	0.936152	1.84519	1.66656	24.8762	3.18541	3.71644	5.07653	5.26338	5.59665	12.643	20.0919	2.99061
MYH7B	1.76871	6.54847	1.51804	1.85351	2.71617	0.137157	0.179007	0.0664003	0.0460703	0.1361	0.197017	0.409952	0.139476	0.517077	0.396538	0.239359	0.177327	0.588927	0.888921	0.246013	0.0425862	0.446582	0.204534	0.267248	0.228844	0.155433	0.151467	0.361092	0.278818	0.108369	0.39774	0.469409	0.112231	0.215383	0.14414	0.0777307	0.140427	0.0894211	0.129344	0.220354	0.783533	0.0474998	0.328172	0.624446	0.116621	0.403897	0.219646	0.254267	0.133052
TOMM22P5	0	0	0	0	0	0.0495576	0	0.0856851	0.104039	0.122939	0.175768	0.111372	0.151187	0.0819434	0	0.402258	0.0416051	0.204607	0.0825671	0.158732	0.109909	0.135977	0.160657	0.197066	0.104666	0.100288	0.0770819	0.0836346	0.592605	0.146834	0.0835535	0.167101	0.173792	0.212243	0.144669	0.212771	0.169131	0.255077	0.122986	0.178918	0.097961	0.183886	0	0	0.0363255	0.142146	0.0912216	0	0.180279
TMEM63C	9.31954	2.66019	8.93178	9.76189	7.52962	0.745366	0.775044	0.605943	0.6819	0.4453	0.557829	0.330404	1.72108	2.96525	2.26044	0.228961	0.77215	1.38341	3.54323	1.6354	0.39052	1.09763	0.979102	2.4405	3.79473	2.14147	0.412152	1.89839	1.65586	0.523408	1.3172	0.697488	0.70743	0.453939	2.55849	0.293592	2.37654	1.24949	0.967305	1.82383	1.40241	0.875386	3.65751	1.48252	0.203002	3.71359	0.440553	1.3547	2.22639
AC108161.1	0.0853169	0	0.139515	0.151733	0.0470887	0.48707	1.48699	0.374286	1.47698	0.805528	0.527852	0.5473	0.27517	0.313199	0.601787	1.20802	0.590648	1.1172	1.03692	0.751146	0.900188	0.445477	0.116963	0.753215	0.514348	0.76663	0.673412	0.365329	1.61787	0.587946	0.410597	0.410582	0.695888	0.463555	0.368631	1.4406	0.369395	1.11422	0.31338	0.92808	0.320932	0.803242	0.809306	0.502841	0.357021	0.569173	0.249044	0.196722	0.656241
CDS1	12.3435	1.79406	9.5382	9.58499	9.70882	0.95587	0.586247	0.219236	1.86336	1.48809	1.64755	0.427436	2.96074	0.80236	0.606386	0.860986	0.622333	0.966484	1.3813	1.57247	0.146016	0.450504	0.505921	0.727237	3.37841	1.03133	1.64985	1.43208	1.25382	1.23786	0.45223	1.90341	0.421864	0.654443	0.484047	0.95898	1.00418	4.02464	1.22239	0.272909	1.04114	1.74324	2.21221	3.31541	0.89726	1.46878	0.336636	1.54672	0.64459
AMPH	48.5647	11.5805	48.8406	39.9285	39.7805	2.5863	1.15343	0.327036	1.9287	2.66213	1.3691	2.01693	1.78607	6.21999	3.34806	2.26379	2.2685	4.57401	4.62412	4.71066	0.316759	1.93825	10.5451	3.87969	4.85083	6.36649	0.48633	1.10095	3.36963	1.36866	4.84207	1.07706	0.577579	2.66166	8.15471	0.715961	6.74067	6.70892	2.64717	3.21231	5.73805	1.16973	10.4791	1.45258	0.582872	1.9782	0.856206	3.17816	5.2612
AC107075.1	0.327682	0.272601	0.119077	0.129504	0	1.59358	5.71118	4.31264	7.1273	4.21107	3.07175	3.34771	0.845491	2.34857	1.751	4.07735	3.54823	4.00483	3.57852	1.18358	4.37939	1.71097	2.17126	3.3062	2.26815	3.5754	3.71798	1.87086	4.55683	3.14774	2.04427	1.1097	3.32068	2.37387	2.69681	6.66338	2.12814	2.61521	3.89743	2.25129	0.821749	3.68494	2.69391	5.04282	1.87909	1.92108	2.35941	1.3852	5.46101
FMOD	2.30031	0.433156	2.19709	1.89194	1.058	10.9173	13.5898	107.023	19.3592	10.4843	6.2301	8.44903	8.51528	7.69999	30.2049	20.4867	7.89629	18.453	1.56596	21.9365	32.1424	38.3051	22.7425	0.764496	4.47684	5.50663	31.733	7.50951	115.654	10.0488	19.4703	6.38829	74.6196	49.1208	9.45932	66.7277	1.31598	27.538	10.7873	10.269	37.8404	39.7939	15.0843	4.40722	2.11501	12.3736	14.8691	15.4401	4.76609
PPIAL4C	0.0285812	0	0.0311584	0	0	0.108779	0.249071	0.188079	0.0761215	0.179901	0.0964529	0.203717	0.0368728	0.0899329	0.0733086	0.0735797	0.182646	0	0.151029	0.232277	0.0402084	0.0663266	0.117548	0.0720935	0.153161	0.146755	0.0845974	0.0611927	0.433589	0.143245	0.152833	0.244524	0.0847718	0.155291	0.246983	0.217948	0.0412491	0.186631	0.0899848	0.0981811	0.107512	0.179391	0.072298	0.112301	0.0265782	0.0346678	0.0667438	0.0329509	0.0879363
AL392089.1	0.381082	0.808415	0.45699	0.67774	0.336527	0.821886	0.996284	1.33745	1.01495	4.97727	1.84332	3.0965	0.983275	11.1117	1.22181	0.0981063	0.974114	3.79251	1.4096	1.13558	25.0364	3.75851	2.87339	2.73955	1.68477	1.56539	2.78232	0.203976	5.63666	4.29735	1.54871	0.489049	6.89477	1.24233	1.59951	9.75577	4.78489	1.65894	1.55974	6.28359	1.33793	2.51147	8.67577	1.57221	0.567001	0.73958	0.756429	1.01049	6.09692
LINC02320	0.566587	0.282809	0.617678	1.03005	0.500343	0.0479202	0	0.041427	0.301804	0.0594388	0.0424903	0	0	0.039618	0.145325	0.972419	0	0	0.0798391	0.0511624	0.106278	0.0876563	0.0517831	0.0476389	0.101208	0.0484873	0.782619	0.121307	0	0.473277	0.0403965	0.08079	0.224066	0	0.0466298	0.246889	0.163543	0.164433	0	0	0	0	0.143322	0	0.0351254	0.0916329	0	0.609664	0
HMGN2P25	0.0639877	0	0	0	0	0.48707	1.11524	0.491251	0.852107	0.503455	0.14396	0.27365	0.247653	0.671141	0.492371	0.823653	0.40891	0.335159	0.0676249	0.520024	0.81017	0.296985	0.175444	0.403508	0.171449	0.0821389	0.0631324	0.0684993	1.69876	0.400872	0.547462	0.205291	0.189787	0.115889	1.0269	0.418237	0.277046	0.278554	0.268611	0.439617	0.320932	0.502026	0.161861	0	0.297517	0.155229	0.298853	0.147541	0.787489
CD180	0.127072	0.211425	0.214393	0.243929	0.297237	1.36262	4.91726	0.474511	1.07978	0.937912	2.67509	1.16882	1.37785	0.298295	0.504417	1.62789	1.04406	1.28363	0.399688	0.995826	0.229844	0.947857	0.933247	1.64462	2.9346	1.61177	1.52239	8.30117	1.12452	1.04628	0.556542	2.71142	2.75942	0.520559	0.851578	2.94326	0.663712	1.45538	0.730293	0.381084	0.671477	1.31505	5.59838	0.529012	2.19453	0.543137	1.22583	1.61499	1.0193
PANTR1	7.94448	18.4074	5.33828	5.82985	9.82368	44.9809	15.2276	73.8499	56.8206	134.894	104.658	30.4417	28.074	163.797	19.5692	54.4001	26.0553	27.7769	20.4211	26.9431	149.152	36.1653	98.6063	29.8795	26.3768	41.7834	29.6091	8.41762	49.6264	76.9094	35.5283	31.3116	29.6802	67.0106	84.153	149.76	17.9463	50.7265	50.2593	56.6984	31.4893	45.0815	51.3967	28.7805	148.246	75.8337	14.1158	41.8836	201.482
HOXB9	0	0	0.0144867	0	0	0.00842921	0.318456	0.0728705	0.318525	0.752784	0.112111	0.0568293	0.0514305	0.236941	0.485694	0.290784	0.049536	0.139206	0.0280875	0.413977	0.0747774	0.593624	0.528304	0.0167594	0.0979141	0.119405	0.268771	0.135141	0.176392	0.0915747	0.0497404	0.120794	0.187214	0.0481336	0.287078	0.050666	0.21096	0.188005	0.160376	0.0456479	1.00806	0.500431	0.00840349	0.0522128	0.0926787	0.274011	0.372379	0.957504	0.0511059
NYAP1	28.0185	8.54536	27.3231	25.1176	28.0514	2.30541	0.770967	2.38639	3.59168	1.56523	6.83724	3.30629	6.52729	7.63401	5.05964	3.61948	1.96602	5.53564	6.9037	5.73244	1.49352	1.50372	4.03845	3.088	6.47711	3.70161	3.13761	2.60572	2.70238	7.00447	4.95579	3.37534	2.82257	3.10928	5.76771	2.15152	5.95616	1.7591	7.95962	3.49356	6.4999	1.28315	10.5181	2.67756	3.52646	9.01981	1.84262	2.75663	7.23157
PCED1B-AS1	0.743184	0.851263	0.79206	0.690453	1.01015	2.73706	24.0452	1.95257	16.0269	4.0408	3.76204	3.31271	9.02979	0.767862	5.31322	4.38337	2.85311	2.905	2.26837	6.09991	1.11574	1.35785	1.54348	5.22515	3.21728	6.22949	6.53359	11.5716	8.16135	4.07915	1.80316	3.50535	6.73623	0.703129	1.54735	5.58867	4.33035	10.3697	3.27694	1.48605	4.708	11.6877	5.89234	2.84385	2.24866	1.43963	4.36468	5.39022	2.90087
GABRA1	55.6474	7.09282	49.5347	42.141	41.6666	3.71836	0.176807	0.112971	0.299277	4.87738	0.0421345	0.369316	0.0845645	1.21788	0.0240181	0.297319	3.07846	0.245238	2.50047	0.31286	0.272252	0.148492	0.97992	0.751903	2.56338	2.73663	0.0523537	0.130316	1.97696	0.00391095	0.614226	1.08153	0.0509186	2.36865	0.570286	0.33323	2.81551	7.27637	0.0458605	0.0214447	0.250483	0.509373	6.64026	0.564163	0.014513	2.44959	0.0218673	2.11236	0.792291
OSMR-AS1	0.0780077	0.0324476	0.0850419	0.184978	0.143515	0.659766	0.50985	0.0285184	0.0346269	1.92313	0.745883	0.166804	0.251596	0	0.383495	1.47271	0.332336	0.204297	0.0824419	1.12705	1.1523	0.890054	0.534713	0.213165	0.226433	0.133515	0.974891	0.153098	0.295853	0.374674	0	0.681294	0.559147	1.69537	0.5457	0.665671	0.806844	0.679173	0.313821	0.133985	0.766197	0.79563	0.805748	0.510846	0.858401	0.441561	0.470597	0.704485	0.120004
RBMXP2	0.0734105	0.238176	0.0480181	0.0522231	0.0972414	0.745062	0.51179	0.660208	0.742967	0.646905	0.611089	0.376737	0.24624	0.58518	0.395415	0.869349	0.672414	0.538321	0.620667	0.934678	0.53703	0.851797	0.563585	0.592549	0.196697	0.282704	0.24626	0.298629	0.556836	0.53349	0.455359	0.565253	0.326603	0.824319	0.688748	1.08761	0.444982	0.319574	0.816643	0.672473	0.165686	0.230382	0.222836	0.490356	0.546127	0.819205	0.514293	0.524732	1.08415
MT1XP1	0.737579	0.230099	0.904599	0.874504	0.610634	1.98843	20.0864	3.84247	15.7154	8.55982	1.65941	21.5546	4.40095	6.28563	3.66543	8.54474	2.65132	6.76084	19.0004	8.8665	49.2877	2.4605	4.67663	5.46515	3.08793	2.60372	5.09404	3.25703	20.2808	16.4039	2.76086	3.05655	10.9383	10.6867	6.37374	7.43233	5.1894	9.63258	3.58004	5.91198	4.62418	5.64213	4.08134	18.8376	5.31564	5.70341	3.44484	2.65733	11.9139
PPIAP39	0.103305	0.171881	0	0.122483	0.114034	0.262118	0.300086	0.226601	0.917127	0.975369	0.968403	0.392708	1.33275	1.69753	1.45734	1.4184	0.36676	0.5411	0.0363925	0.792915	0.435995	0.879027	0.755326	0.217149	2.12211	0.530439	0.169874	0.442357	0.914194	0.733484	0.184137	1.25208	0.204269	0.124732	0.552629	0.712739	1.64002	0.524666	0.9396	0.118291	2.41794	1.621	2.43897	0.676513	0.448307	1.00244	0.402071	0.317599	0.317842
HPCA	141.264	32.7168	138.086	123.77	128.125	9.03669	1.12589	2.21047	2.17927	9.47396	1.09485	2.62755	5.27813	15.9901	1.81154	1.70737	9.14608	5.54906	13.026	5.07487	3.71993	2.16869	7.12016	5.24678	20.7241	12.1178	1.34268	6.06702	10.6818	3.17283	3.58325	6.91754	1.0985	11.0287	9.29308	3.36845	15.3394	44.7127	3.52527	0.2367	3.68274	1.70291	62.7043	7.36077	2.16256	9.32948	1.79011	6.0672	14.2306
RPS3AP26	0.371847	0.382129	0.643834	0.389009	0.410464	16.0393	30.4985	13.5541	40.2551	48.9451	11.0724	15.7465	8.09885	6.44672	6.3958	15.6545	17.0299	11.2278	12.8991	24.2054	43.0189	13.8068	18.7117	16.0831	4.86444	28.1062	12.8191	4.6597	24.0576	13.5114	7.5325	7.78953	10.7046	15.8064	13.9603	50.1821	6.78716	24.5191	9.38872	11.396	13.1647	34.4252	13.0303	11.0869	7.26154	7.72066	12.5145	6.35482	26.9866
GPR83	8.1218	1.3843	10.0461	3.97907	7.32076	0.40138	0.0872505	0.0131769	0.0959963	0.207966	0.0495555	0.0342542	0.0930001	0.306637	0.0564966	0.0515505	0.183414	0.482466	0.795706	0.233254	0.0394384	0.041822	0.208632	0.191935	0.72968	0.64775	0.0237078	0.13719	0.197454	0.0200717	0.111359	0.175598	0.0237567	0.420686	0.148318	0.0479902	0.525969	0.810682	0.0168117	0.522777	0.060259	0.0188524	0.921876	0.0786789	0.0260692	0.267174	0.0327328	0.424776	0.0862523
AC060766.5	0	0.0245686	0.0643916	0	0.086933	0.199824	0.943667	0.0647803	0.157312	0.185891	0.110738	0.1684	0.076201	0.103252	0.328248	0.55755	0.209697	0.309378	0.187269	0.426686	0.0553962	0.388365	0.0539828	0.148988	0.211014	0.050547	0.0777014	0.737684	0.224013	0.0246691	0.252675	0.273721	0.554763	0	0.121527	0.150137	0.312565	0.257127	0.185962	0.0225445	0.0987482	0.247151	0.0249017	0.0773601	0.0549262	0.191051	0.068966	0.453973	0.030288
PPP1R2B	0.0560415	0	0.0916424	0.0664451	0.0309308	0.106646	0.244187	0.430246	0.298516	0.308654	0.409767	0.199723	0.216899	0.0293898	0.215614	0.216411	0.328286	0.440307	0.444203	0.341584	0.15768	0	0.230486	0.21204	0.150158	0.323724	0.248816	0.119986	0.743903	0.245764	0.209771	0.0898986	0.249329	0.101497	0.415097	0.915749	0.485283	0.365943	0.176441	0.096256	0	0.219842	0.177201	0.440396	0.234513	0.135952	0.359893	0.129219	0.517272
CDC45	0.066281	0.0902286	0.0985333	0.0714414	0.0598619	4.29612	1.26023	7.124	1.669	4.77883	4.98193	4.43224	3.04725	12.5957	1.76188	2.69913	9.38261	8.83709	0.254722	5.75388	4.32318	2.95044	6.848	4.60527	2.5509	6.31933	1.17711	0.219313	3.6107	5.33017	6.1477	3.62791	0.616576	3.86318	9.71466	7.18763	3.04368	0.445921	7.7717	4.75382	2.72747	1.41823	1.21174	0.603727	6.02912	2.96004	6.5149	1.76448	7.18383
EMP3	4.17659	5.00641	4.30648	6.14723	4.39459	34.0367	69.6114	88.9962	95.1542	69.3327	50.2805	108.211	66.5303	18.5908	67.6665	38.7452	74.4501	39.6039	2.52228	63.3433	115.763	52.3173	43.169	6.26655	57.4286	25.7239	79.0354	62.5068	60.5516	136.976	102.999	100.454	148.562	68.8982	21.1826	84.3739	56.0018	52.5523	36.1559	12.8984	120.372	110.831	118.492	61.3782	75.181	37.8455	115.875	83.0434	19.6076
RPL17P22	0	0	0	0.0367671	0.0684617	0.27539	0.675599	0.51016	0.660729	0.390383	0.209301	0.309444	0.200033	0.0975764	0.198848	0.319333	0.165141	0	0.557141	0.294022	0.436258	0.215891	0	0.273773	0.166179	0.318455	0.336554	0.0663935	0.940881	0.427404	0.198987	0.19898	0.367906	0.336979	0.076564	0.472944	0.134265	0.337489	0.162721	0.284068	0.0388832	0.486593	0.352992	0.182769	0.0865113	0.225685	0.108625	0.286011	0.28623
HOXB4	0.00456447	0	0.00995211	0	0	0.295328	0.477325	2.58815	2.01802	1.41498	0.0872877	0.175684	0.117773	1.43146	1.77369	3.99528	0.32572	0.741151	0.0337674	0.408046	0.667821	0.0794436	9.19231	0.0805943	1.8284	0.117185	3.79191	0.195452	1.2291	0.19445	0.907969	0.146441	0.128613	0.066134	0.800141	0.0447515	0.210802	1.71877	0.340108	0.0313594	2.40379	2.35638	0.814002	0.0896735	0.0339567	0.177168	0.415705	0.578855	0.0140436
GBP1	0.941255	1.28172	1.50175	2.08943	1.38029	27.8833	20.4466	43.1692	20.4577	24.6824	12.6865	89.2683	30.0921	10.7372	22.2701	20.2256	7.57368	13.2071	8.22672	14.08	15.9481	11.0172	11.2885	10.4891	44.9405	6.89677	14.9266	21.6271	16.4159	11.6731	12.6492	22.4135	17.3568	12.2441	4.34679	53.3719	10.9518	12.4047	20.1384	2.94622	7.95573	23.0114	4.97049	14.1051	12.3212	17.7381	16.0321	7.66346	2.07686
LOXL4	0.131444	0.222603	0.122825	0.350651	0.202096	1.00054	2.00457	0.272877	0.625143	0.650068	0.264038	0.347987	0.926615	0.22157	0.674287	1.982	0.51999	0.39342	0.148838	0.616778	0.23775	0.14707	0.637132	0.148016	0.905635	0.144626	1.4914	1.75889	0.267062	1.08228	0.386581	0.647625	1.03731	1.50487	0.330327	0.0920512	0.819788	0.347411	0.502516	0.241892	0.382605	0.456702	0.463119	0.66403	0.379792	2.0385	0.624866	1.78059	0.108326
SEM1P1	0.0820512	0	0.1789	0.0972833	0	0.520474	1.78759	0.899899	2.18531	0.90381	0.738396	0.701801	2.01125	0.430301	0.631366	1.9011	0.262172	0	0.867152	1.55593	0.461724	0.476028	0.337457	0.517417	0.879395	1.05326	1.05241	0.702691	1.86713	0.82246	0.702009	0.701984	0.60841	0.891623	0.911624	1.51953	0.236837	2.14313	1.46387	0.657673	0.925942	1.93124	0.415108	0.644791	1.14451	1.09477	0.287413	0.567575	0.378673
TMEM271	14.8322	5.05873	15.7137	17.7001	17.296	0.448994	0.42057	0.0352868	0.171381	1.51887	0.217155	0.18346	0.124524	5.8043	0.330095	0.248487	3.11835	5.8983	1.29211	1.83033	0.49789	1.79194	1.85253	0.608669	1.55173	2.76714	0.317439	0.585521	1.70833	0.886883	0.722589	0.860193	0.143142	1.74812	3.0186	0.280394	0.696514	1.12049	0.101296	0.147364	1.41198	0	4.51693	1.3906	0.0598383	0.429282	2.66725	0.408022	3.11819
RBBP8	1.12169	1.36609	0.943749	1.48967	1.08573	4.78192	5.10764	11.0756	6.76437	8.44381	30.0745	4.88825	9.5865	9.97017	8.13868	8.53299	9.32067	8.41591	4.86283	15.2205	5.09891	6.01122	7.79495	7.5747	4.37281	9.23163	5.11141	4.47496	3.78145	19.3892	7.06077	5.86095	6.34914	12.7747	9.53084	18.5492	5.84828	4.78767	11.0082	8.30036	6.02288	11.8079	1.94698	4.15587	16.9461	9.66694	7.42952	6.55135	4.67922
AC004453.1	0.882654	1.88817	1.5121	0.897009	1.43828	33.9668	37.3606	20.5135	35.3741	36.1125	18.2031	21.0907	10.3569	14.3716	14.5	18.9359	19.2047	22.896	27.2296	21.8045	37.9615	13.8993	13.9444	25.2327	13.6832	28.4338	18.4953	8.86394	30.2875	26.6478	14.3843	10.4282	16.7674	23.5981	19.7171	44.1391	10.7976	23.8778	10.9834	33.449	10.8566	28.6234	19.7756	28.1578	12.781	11.216	16.7841	11.0482	37.9549
PABPC1P1	0	0.0362085	0	0	0.0640597	0.220871	0.758592	0.190943	0.386404	0.228301	0.261125	0.289547	0.149737	0.334776	0.372125	0.373501	0.370856	0.759921	0.459987	0.275117	0.204104	0.437688	0.437572	0.25617	0.272114	0.14899	0.229028	0.310623	0.440192	0.254496	0.310321	0.372372	0.430314	0.26276	0.214923	0.284486	0.293141	0.252631	0.274065	0.332254	0.181916	0.273184	0.146798	0.684068	0.269829	0.175979	0.0338801	0.301074	0.223189
AC016894.1	0	0	0	0	0	0.209863	0.240261	0.181426	0.293717	0.347077	0.248111	0.235814	0.213412	0.694016	0.0707157	0.141954	0.0587288	0.288819	0.233099	0.522811	0.465435	0.191942	0.302373	0.417261	0.443232	0.353911	0.16321	0.118057	0.418253	0.345446	0.235884	0.235875	0.163547	0	0.136141	0.180205	0.159161	0.12002	0.115736	0.252556	0.207419	0.346091	0.348704	0.433316	0.205105	0.334416	0.386298	0.317854	0.678608
FKBP10	5.51825	6.20993	5.35519	5.98118	6.36157	97.3537	48.1063	71.9744	45.1812	40.942	42.6533	92.3779	49.0056	53.7998	52.6731	63.427	74.4008	43.5134	24.6467	38.1657	94.6822	72.0667	60.13	33.133	22.4849	15.0893	68.5887	24.1964	67.6107	40.3135	78.0212	42.4255	63.7246	79.0229	31.4205	55.0295	27.3848	28.189	34.8399	60.6641	54.7499	22.4312	21.7097	54.6788	43.2578	43.8503	81.6717	79.7299	22.5407
GAPDHP46	0	0.0215284	0.0564237	0	0.0190439	0.0437742	0.0751723	0.13245	0.137846	0.13574	0.0582211	0.122968	0.0667717	0.108571	0.066376	0.177657	0.146999	0.271095	0.145863	0.0467359	0.218436	0.0800724	0.0709543	0.0435172	0.0462258	0.0885844	0.221281	0.0554058	0.458017	0.151315	0.0738028	0.12915	0.10234	0.374948	0.0851909	0.244322	0.0746966	0.150206	0.108634	0.0395095	0.108161	0.0541421	0.0872813	0.0338937	0.128345	0.125557	0.020144	0.0596696	0.159241
DLG3	16.7705	4.64323	17.3627	14.3316	17.3562	2.12455	0.72397	2.15557	1.11795	0.798134	4.48818	1.94471	1.70074	8.84424	2.08599	2.09933	1.72774	4.06515	3.48884	2.0462	1.32559	2.349	3.19794	9.09624	3.96571	4.0468	2.28642	1.90505	2.2387	3.81579	3.16811	2.9833	1.73131	2.64098	3.36819	1.08363	2.38534	1.57033	2.37466	1.67724	2.54937	1.53685	3.14944	2.29355	1.32349	3.35452	1.44481	3.67988	2.45849
RPL15P20	0.0286768	0	0.0312626	0.0680007	0.0949648	0.254667	0.499808	0.251611	1.06927	1.30865	0.451619	0.367917	0.110988	0.210545	0.661984	0.51678	0.458143	0	0.515216	0.582635	0.645486	0.432565	0.629017	1.12119	0.499439	0.736228	0.198054	0.184192	0.652559	0.431172	0.306689	0.153339	0.808025	1.14261	0.424815	0.999667	0.289709	0.873858	0.180571	0.459711	0.179786	0.854956	0.290159	0.225353	0.160002	0.243486	0.401802	0.330611	0.617613
NCF2	1.07179	1.43977	1.14928	1.33326	1.37059	3.9529	28.5819	3.11538	13.5864	3.18883	8.0641	3.40642	5.39492	1.50502	6.37695	12.5598	3.44957	2.8223	2.68014	11.241	1.69732	4.22696	4.88176	7.09116	5.40616	7.78883	5.52426	34.772	5.35323	6.76598	3.326	7.96708	13.5496	3.24584	4.39594	16.6779	5.57032	7.12615	4.14889	2.1125	3.17249	6.71796	14.23	4.45292	6.85151	3.20393	10.4971	8.98047	5.05453
MIR7-3HG	9.27617	3.92192	10.1459	17.1847	11.4521	0.735516	0.132956	0	0.162537	1.77661	0.102975	0.0652475	2.34228	4.24061	0.410894	0.0392774	0.682487	0.639307	0.451474	2.39717	0.343417	0.0531085	0.627479	0.461809	1.10374	4.24988	0.0301058	0.0979954	0.810087	0.0382327	0.310018	0.668961	0.0678778	0.884219	1.48792	0.149583	1.51932	3.22121	0.320231	0.01747	0.114782	0.2394	8.91504	0.359683	0.227002	1.96163	0.0178142	0.914651	3.75529
DLGAP1	29.1681	4.21232	28.163	18.4948	21.2626	2.02534	0.30244	4.16209	0.509321	0.746741	5.47039	1.13285	1.462	2.8898	0.105367	3.40608	3.42934	4.02147	3.88189	0.646601	1.61219	3.93653	2.18278	8.31106	1.13486	2.57664	1.39062	0.26689	2.57338	0.317704	3.07081	0.849856	2.86961	1.32894	1.65254	2.09559	5.39312	1.81297	0.38206	6.76708	0.964465	0.373422	2.96872	0.798705	0.850959	1.4622	1.72676	2.06263	1.69321
YWHAEP5	0.201749	0.251756	0.439883	0.372093	0.272191	2.10448	3.61397	2.48313	4.11952	4.90319	2.72338	2.20494	1.70627	1.41071	1.46617	4.44364	2.33979	1.64381	1.68205	2.88449	3.84739	2.34094	1.90535	1.47014	0.870917	1.7553	2.01264	0.719914	3.57073	2.13463	1.82201	2.01373	1.99463	3.04492	2.32454	4.73747	1.97349	1.70774	3.17593	2.15613	1.32106	1.82908	1.07738	1.8937	1.00059	2.31119	1.85836	1.70569	1.79321
AP000569.1	0	0	0.0316329	0	0.0320299	0.294495	0.885024	0.0318238	0.772808	0.547923	0.424328	0.124092	0.112303	0.0304341	0.074425	0	0.0618093	0.151984	0.429321	0.235815	0.163283	0.269347	0.198896	0.109787	0.233241	0.297979	0.4008	0.0931868	0.220096	0.327209	0.0620643	0	0.0430314	0.420416	0.214923	0.126438	0.125632	0.378947	0.36542	0.43193	0.181916	0.182123	0.0366995	0	0.64759	0.281566	0.0338801	0.100358	0.223189
PALLD	3.94891	2.39509	4.56563	4.68803	3.05637	8.03205	10.2101	24.2397	22.3533	16.0993	20.9023	12.0224	10.305	13.3325	20.5987	18.6168	16.41	14.0675	18.3313	17.0614	6.71704	14.5664	31.3034	18.3135	21.032	12.7957	34.8912	26.7072	8.18606	14.5419	19.2195	26.2488	16.5856	8.60442	16.2092	13.5778	19.0209	11.5957	18.6073	12.0139	19.217	17.3999	12.2558	20.2462	12.5175	21.3765	17.8098	18.7462	7.0869
COL1A2	3.19578	0.755763	5.10444	2.03577	1.46435	25.8257	158.565	25.2092	50.4056	7.10913	94.8431	24.2357	12.8982	23.1572	86.7481	19.8657	15.4765	14.1626	4.52599	19.7486	9.31397	15.6476	16.0306	14.6042	12.0287	11.9459	44.4736	108.825	20.7894	35.5872	19.2886	12.7632	22.0053	5.39259	16.2152	10.0657	22.9392	6.598	3.53938	10.5732	11.8171	5.42466	2.33498	8.72457	8.84113	23.9573	50.494	47.7694	7.25025
AC112247.1	0	0.162855	0.0569103	0.123788	0.0576245	0.529821	0.227462	0.343523	0.834209	0.410734	0.587233	0.297669	0.202043	0.164261	0.167371	0.671961	0.417001	0.957015	0.331022	0.565668	0.51408	0.181717	0.143133	0.592549	0.384652	0.301551	0.257526	0.111767	0.296979	0.228931	0.279148	0.279137	0.27096	0.425455	0.418888	0.625552	0.414374	0.397692	0.52046	0.328765	0.130913	0.327654	0.264102	0.461511	0.364085	0.379921	0.243813	0.180553	0.441689
MTATP8P1	1.49119	0.723645	2.70943	1.76802	0.914476	6.62133	23.8242	4.27039	11.0321	7.16998	6.05743	6.49533	11.329	3.73634	14.5555	24.5266	5.82351	16.4892	14.1836	11.8944	2.91365	7.30554	5.22434	10.1349	10.0998	26.0543	10.3805	15.7859	14.7672	4.04823	10.2775	12.4034	10.0743	10.8028	5.52259	2.52693	21.9995	10.0979	3.65156	6.26082	24.6187	11.4394	13.6214	14.1597	8.32013	14.3696	5.99727	9.26446	5.98986
POLD2P1	0.0172003	0	0.0187513	0	0	0.17457	0.224838	0.188645	0.229052	0.0270664	0.212835	0.147118	0.133142	0.144326	0.286764	0.309965	0.164876	0.180186	0.236314	0.116488	0.169383	0.119747	0.0707408	0.238624	0.0921733	0.0883179	0.203645	0.0920652	0.456639	0.129308	0.110371	0.183945	0.12754	0.18691	0.212336	0.0936874	0.0992957	0.0374386	0.198562	0.137867	0.172537	0.134948	0.0870187	0.0675834	0.223929	0.229496	0.261084	0	0.158762
CENPM	0.192899	0.32496	0.357498	0.205838	0.415217	3.84214	1.9752	6.85462	3.31373	3.79432	10.7302	5.73341	4.06887	16.6715	1.79355	2.88029	8.96796	19.8539	0.733909	7.18518	7.66629	2.2942	7.27235	6.28892	3.54046	9.63234	1.93175	0.423324	3.62137	8.04847	5.41535	1.86694	0.843903	2.463	10.9064	3.82451	4.21771	1.55351	7.92554	8.75789	4.28114	4.10137	2.42755	1.06111	15.5343	4.72636	7.02724	1.34546	9.68882
RBPMS-AS1	0.058578	0.0365486	0.0478951	0.0173631	0.0323307	0.0185788	0.638098	0.160614	6.90359	1.45181	0.0494208	0.104381	0.037786	0.0768001	0.0939052	0.226206	0.0467924	0.153412	0.0773846	0.198358	0.164817	0.237892	0.260994	0	0.0588579	0.169188	0.274526	1.25416	0.222164	0.220189	0.0469855	0.0469837	0.260613	0.397842	0.0180785	0.063813	0.0422706	2.13566	0.0461066	0.0335375	0.220349	0.298729	0.0555664	0.661723	0.0136182	0.230921	0.0512975	0.422087	0.112643
GDAP1	39.4437	11.9143	36.7303	34.5928	33.8463	8.86984	3.20866	9.71957	3.73093	5.6874	5.65102	5.80383	7.9606	13.4944	6.56738	3.73709	8.14967	7.24877	11.6201	4.66618	3.77475	10.4793	7.55995	8.65228	9.19081	11.7183	5.39068	4.84316	5.79439	3.2824	10.6184	9.11988	5.32857	6.9904	11.2903	5.33421	9.16805	4.8362	5.75619	7.11401	6.11323	4.89429	7.9328	8.65539	3.49872	9.11185	6.73532	9.70962	13.0863
GRIP2	2.07179	0.356532	1.56537	1.63992	1.94893	0.319719	0.0319213	0.086776	0.0195117	0.131421	0.0692246	0.0438626	0.671045	0.407249	0.248037	0.0490364	1.29682	0.0460472	0.261694	0.674763	0.164901	2.34954	0.0381648	0.112723	0.217886	0.695907	0.0433685	0.141166	0.177822	0.0734339	0.664402	0.380763	0.143411	1.13045	0.141085	0.0191537	0.150138	0.0797297	0.0691954	0.057043	0.049604	0.00919638	0.190876	0.221647	0.186665	0.106634	0.730509	0.359802	0.19159
AC105021.1	0	0	0.0166326	0.0361783	0	0.154845	0.132956	0.16733	0.325074	0.0720246	0.1373	0.108746	0.059049	0.0480069	0.156531	0.235664	0.211246	0.0799134	0.193489	0.103326	0.193172	0.0885142	0.0836638	0.0384841	0.0408794	0.0587542	0.0752646	0.0816628	0.17359	0.172047	0.0815836	0.163161	0.181007	0.138159	0.113007	0.182824	0.0660573	0.232459	0.176127	0.12229	0.114782	0.0478801	0.0964832	0.179842	0.184439	0.129542	0.285027	0.105537	0.117353
MASP1	1.01894	1.491	0.799735	0.756993	0.901823	6.2039	0.772137	18.4335	10.9523	9.97105	2.49176	4.04741	5.25482	7.50568	2.41466	8.16136	6.20479	4.0813	12.2503	4.52518	1.97605	4.82142	6.01448	7.23728	6.68226	3.28835	2.16106	1.0852	8.36144	0.910995	7.96809	16.2143	3.26179	3.95986	14.6039	3.08303	4.90626	5.43401	16.4613	9.10867	14.5555	6.11327	8.47075	7.93813	1.11475	9.81635	3.78524	1.24833	12.3315
IGHG3	0.0395861	0.0098796	0.103574	0.018774	0.332099	0.0803538	9.03831	0.0607826	10.1636	4.64703	0.142497	0.214439	7.91591	0.0166081	1.8581	0.754141	0.0505946	0.66351	0.0920398	5.52275	0.356418	0.110238	0.162808	0.0998525	0.774292	60.8768	1.24201	2.17819	0.120108	0.277761	0.076205	0.0423345	0.176119	0.114712	0.0488687	0.129372	0.251379	278.947	2.6339	0.172248	0.774326	0.211194	0.430584	0.0155542	0.213509	0.220875	0.360527	0.0730214	0.146154
GNG3	216.614	55.2692	214.633	166.139	237.35	9.64458	3.04985	1.30077	16.4153	11.7487	2.01217	2.54993	5.26755	22.8197	0.523633	2.85309	7.66204	11.2024	14.3837	5.18805	4.13025	3.45169	12.7143	5.93422	25.1101	29.7753	5.96594	6.20252	12.3145	13.6911	3.72206	5.71804	3.08523	7.8878	8.32876	5.33751	12.7676	54.2119	1.63238	31.3467	5.92414	2.07459	90.7168	7.06656	0.849779	16.933	0.476741	8.83174	17.9163
HSPA6	0.332704	0.261736	0.331165	1.00332	1.62072	5.43207	8.91865	5.74311	7.70526	2.62909	6.23222	6.73272	3.26583	4.00545	6.55789	11.7305	1.42512	3.22013	1.03956	5.87796	17.033	3.60866	18.9881	15.3157	1.97669	18.0859	7.17169	8.85758	9.65564	25.7189	6.14943	10.5117	12.8606	5.38377	17.3484	9.56519	5.43841	2.31419	2.83124	1.37478	3.0653	7.43363	20.4362	4.02124	5.71022	5.05322	6.40132	25.2072	1.40194
LINC02473	0.187503	2.11555	0.0681368	0.416833	0.379455	0.0495576	0.0680832	0.128528	0.104039	0.172115	0.0527305	0.133646	0.0604748	0.114721	0.260505	0.0804516	0.0416051	0.572901	0.115594	0.0634927	0.0769364	0.0725211	0.0963944	0.157653	0.115133	0.290835	0.0231246	0.117088	0.207412	0.176201	0.0501321	0.208876	0	0.141495	0.0385785	0.0340433	0.157855	0.119036	0.106588	0.178918	0.0587766	0.0980724	0.187744	0.245579	0.0871813	0.132669	0.0820994	0.0450354	0.252391
AC005070.3	1.88597	2.07037	2.16201	1.36777	2.35369	0.378219	0.225915	0.319862	0.172611	0.20397	0.342652	0.267927	0.543477	1.24397	0.955838	0.31701	0.310623	1.28997	1.50002	0.474035	0.164116	0.849763	1.01288	0.858256	0.92904	0.915138	0.268563	0.360773	0.516178	0.203012	0.408942	0.395065	0.297951	0.234756	0.584053	0.289468	0.589273	0.112853	0.482912	0.430424	0.593226	0.366104	0.565597	0.432907	0.253126	0.518838	0.332962	0.388537	0.488535
ABHD17AP3	0.0452472	0.0941039	0.0164424	0.0715293	0.0665951	0.114806	0.460026	0.248125	0.241018	0.308538	0.186628	0.408509	0.194579	0.189832	0.154741	0.194142	0.36947	0.947996	0.239096	0.163432	0.678981	0.245006	0.165414	0.380441	0.141442	0.329134	0.193451	0.145312	0.514816	0.377955	0.290343	0.354851	0.201305	0.218527	0.242048	0.246455	0.239441	0.361116	0.253255	0.224513	0.397143	0.165664	0.343368	0.385202	0.252458	0.256121	0.281768	0.191272	0.394437
RPSAP76	0.040208	0	0	0.0238361	0	0.10202	0.525589	0.24254	0.481895	0.50617	0.22615	0.315248	0.2853	0.0421725	0.360957	0.465803	0.513894	0.105302	0.361195	0.40846	0.452522	0.116635	0.110244	0.152132	0.1616	0.49033	0.158682	0.107607	0.45748	0.352655	0.215006	0.171998	0.2087	0.400516	0.347455	0.547517	0.145073	0.393829	0.105492	0.368323	0.226872	0.283913	0.17799	0.236978	0.205646	0.170697	0.258211	0.162244	0.21649
ISCA1P6	0.043971	0	0	0	0	0.0557841	0.191593	0.0482253	0.35133	0.207578	0.247315	0.0626822	0.113455	0.0461194	0.112782	0.113199	0.234162	0	0.185882	0.119117	0.185577	0.0510205	0.120562	0.0554565	0.0589082	0.169332	0.173533	0	0	0.275471	0.0940513	0.0940478	0.130418	0.398182	0.217128	0.239504	0.0634602	0.191417	0.184584	0.0503493	0.0551344	0	0.0556139	0	0.0817791	0.21334	0.0513414	0.152081	0.20293
HNRNPA3P11	0	0.0687341	0.0600483	0	0.0202673	0.209638	0.320006	0.161095	0.293402	0.231137	0.0826149	0.130868	0.0473741	0.0962879	0.0941867	0.803547	0.117332	1.15404	0.0776166	0.124345	0.0516596	0.383473	0.0755124	0.0694691	0.122988	0.0707063	0.163036	0.0786201	0.417805	0.0690153	0.235632	0.0589057	0.108914	0.266023	0.203993	0.120008	0.15899	0.0799277	0.115612	0.0840952	0.0920875	0.0576202	0	0.180355	0.0170738	0.0668116	0.128628	0.0846704	0.16947
TK1	0.525242	4.92148	0.823747	1.05977	0.722195	9.27047	9.11431	15.9276	9.6696	8.78723	12.9364	12.1639	9.90276	19.7843	7.68145	10.6752	16.2821	28.332	0.54536	15.5517	14.5191	4.82213	9.82827	10.4596	7.65395	12.1599	5.73681	1.73615	8.98166	12.4002	11.5303	8.57346	3.26606	14.0188	21.4885	5.90252	12.6075	6.61884	12.0109	16.2176	7.29072	7.56217	4.39382	2.64309	15.4756	6.70629	14.8156	6.58664	16.9824
BCL2L10	0.676067	0.0324476	0.779551	0.400786	0.674521	0.0164942	0.05665	0.0285184	0.0692539	0.102294	0.0438755	0.0556014	0.0503192	0.122729	0.0166737	0.0669413	0.110779	0.204297	0.0412209	0.0704404	0.0548712	0.181028	0.124766	0.213165	0.156761	0.116825	0.0128275	0.0278359	0.147927	0.0488706	0.0556179	0.0973277	0.0578427	0.0470936	0.04815	0.113306	0.0750552	0.25469	0.0136444	0.0446616	0.146719	0.0816031	0.230214	0.076627	0.108811	0.0473101	0.0303611	0.0299781	0.0200007
HOXB7	0	0	0.0367049	0.0133064	0.024777	0.185095	1.32034	0.886235	3.16841	20.08	0.403991	0.543957	1.2307	3.94339	8.13208	3.98717	7.14808	3.17436	0.0474436	2.75145	3.37877	14.5068	13.0933	0.169854	5.65334	13.4701	17.2517	0.865027	2.21335	0.717163	1.65636	4.32078	4.85995	0.284565	3.29741	2.06619	0.712681	10.6507	8.93959	0.488335	12.3554	24.1086	0.113557	4.9389	0.605315	4.51952	5.18924	11.1145	1.27761
SCN5A	0.304729	0.0726339	0.278083	2.09269	0.238109	0.019547	0.0447567	0.018776	0.0136786	0.0377152	0.0404415	0.0219641	0.117057	0.172378	0.133927	0.0705166	0.0346439	0.8429	0.0578967	0.0927532	0.0337177	0.0496605	0.0187757	0.0669331	0.0344028	0.158226	0.00844538	0.0898006	0.0389568	0.0321754	0.0677428	0.0329547	0.0228495	0.0775137	0.063402	0.0111897	0.0864761	0.0558943	0.0143731	0.172506	0.0558114	0.00805888	0.0801146	0.0269065	0.0573115	0.0436073	0.0159913	0.0355266	0.047405
NAP1L4P1	0.0444651	0.0184954	0.0323164	0	0.0981659	0.169233	0.516656	0.178813	0.236852	0.116617	0.200075	0.105644	0.095608	0.26428	0.0380166	0.152629	0.12629	0.0776341	0.140978	0.140531	0.166811	0.154781	0.203194	0.112159	0.11914	0.114157	0.190107	0.174534	0.337278	0.0928555	0.142662	0.237761	0.0659417	0.295281	0.128081	0.290633	0.19252	0.0645224	0.357762	0.118802	0.0557539	0.162801	0.0562387	0.203831	0.248094	0.251694	0.0865304	0.0854388	0.20521
C1orf140	0.0118539	0.0788911	0	0.00468484	0	0	0.0688676	0.0260017	0.578804	0.248712	0.00444484	0.0281637	0.606617	0.00828875	0.233101	0.142412	0.00841689	0.186268	0.0167037	0.272953	0.0111175	0.064187	0.0162508	0.00498342	0.0476423	0.0202887	0.0584775	0.0592187	0.074929	0.0643613	0.0295806	0.0507078	0.105476	0.00715627	0.0146336	0.0990021	0.239511	0.602036	0.319301	0.0271469	0.0247724	0.142603	0.174915	0.170781	0.018372	0.0479278	0.00461362	0.0728868	0.0243142
SLIT2	5.13825	0.943046	4.28877	3.50454	3.55321	0.418898	0.47701	0.1801	0.164596	1.19199	1.54531	0.115787	0.241465	0.198163	0.534416	0.227285	0.257646	5.30871	0.505711	0.502247	0.0198724	0.182344	0.341314	0.282821	0.454185	1.62062	3.33442	0.765539	0.890661	2.08186	0.162401	0.462637	0.866746	0.335782	2.23862	0.386628	2.79553	0.411234	0.087094	0.171857	0.538004	0.166239	0.437719	0.502996	0.167482	1.06873	0.156688	0.405101	0.304228
SUMO2P6	0	0.148606	0.19474	0	0	0.982032	1.81614	0.783662	1.11011	0.843287	0.602831	0.509293	0.230455	0.686987	0.458179	1.22633	0.507351	1.24754	0.692216	0.725867	1.08898	0.345451	0.979564	0.600779	0.398858	0.687913	0.528734	0.509939	0.903311	0.522248	0.509444	0.573104	0.883039	0.647046	1.02909	1.03785	1.03123	0.648025	0.624894	0.818176	0.447967	0.654029	0.376552	0.233961	0.498341	0.288898	0.417149	0.480534	1.0992
HIST1H1B	0.0251816	0	0.0274523	0	0.0555937	0.223628	0	0.110472	0.134135	1.94167	0.113307	0.107692	0.129948	0.211296	0.0645891	0.194484	0.0536407	71.0931	0.026613	0.306974	0.495963	0.0292188	0.414265	0.0952777	0.269888	2.23041	0.0496901	0.0269571	0.286513	0.725691	0.0807929	0.08079	0.0373444	0.364854	0.248692	0.329185	0.218057	0.0548109	0.0264272	0.201841	0.126299	0.11854	0.0636987	0.148416	0.0702507	0.274899	0.382233	0.0870949	8.48372
AC083805.1	0.00892464	0.0278418	0.0194588	0.037035	0.0246287	0.0566115	0.116661	0.0293644	0.0356541	0.0702191	0.0501967	0.0254448	0.120895	5.51813	0.16596	0.114878	0.0475271	0.0934922	0.198071	0.0785742	0.0125553	0.0414218	1.33361	0.69786	0.890751	0.819124	0.0924562	0.085985	0.118467	0.078276	0.0190892	0.0381771	0.0661762	0.0404088	0.115683	0.0194445	0.0966021	0.0194256	0.252885	0.183946	0.0223809	0.0560158	0.045151	0.0526	0.0663936	0.0270631	0.0208411	0.102891	1.13267
PSMA6P2	0.0249981	0.124777	0	0.0296388	0	0.15857	0.217846	0.219334	0.732365	0.78674	0.0562408	0.285085	0.129001	0.104878	0.38471	0.450488	0.106499	0.130937	0.317029	0.237018	0.597851	0.203041	0.411245	0	0.301411	0.160446	0.271304	0.160564	1.1377	0.187931	0.0267347	0.133668	0.111217	0.362195	0.18516	0.490179	0.18039	0.326469	0.157408	0.20037	0.219413	0.156901	0.158086	0.294668	0.162724	0.212252	0.145941	0.25938	0.153824
RPL36AP51	0	0	0.0587894	0	0	0.0684145	0.234973	0.118289	0.430877	0	0.0606622	0.153749	0	0.113123	0.0691591	0	0.114872	0	0.227968	0	0.379325	0.187717	0.147859	0	0.144492	0.069224	0.26603	0.0577289	0.409046	0.135137	0.173019	0	0.0799734	0.195335	0	0.411223	0.233485	0.469512	0.0565942	0.0617491	0	0.423091	0.136411	0	0.100295	0.261644	0.0629658	0.124343	0
USP41	0.053859	0.0403251	0.0117431	0.0127715	0.0118905	0.177654	0.0469355	0.05907	0.0860671	0.101703	0.0484688	0.0153556	0.0972776	0.282452	0.110516	0.0831931	0.0229455	0	0.147993	0.0437709	0.0757696	0.0499949	0.147673	0.108684	0.389638	0.276548	0.0425113	0.0115313	0.0408533	0.0404901	0.103681	0.149756	0.0479237	0.0195089	0.0398931	0.0352034	0.139915	0.0703384	0.14696	0.703056	0.0270131	0	0.081744	0.0423245	0.0801353	0.0391973	0.0125773	0.0124187	0.0331418
RPS3AP37	0	0	0	0.0272916	0.0254089	0.175214	0.300891	0.100982	0.551754	0.181109	0.0517868	0.0984405	0.0593925	0.0241431	0.177121	0.118518	0.147098	0.120567	0.0973072	0.218247	0.485739	0.0801261	0.0315564	0.145155	0.0925135	0.236384	0.31795	0.073924	0.436499	0.201889	0.123087	0.147699	0.170681	0.166755	0.028416	0.777342	0.0332208	0.200409	0.024157	0.079072	0.086587	0.252833	0.0582266	0.180888	0.085621	0.111682	0.0537534	0.10615	0.495748
FUT9	9.96372	3.88084	8.78268	6.27944	7.88287	0.307648	0.326793	0.374266	0.609239	0.771062	1.39769	0.0855318	2.64149	1.12752	1.75697	0.801283	0.214346	2.60583	4.08336	2.12654	0.0298947	0.192903	2.22603	2.81879	3.48825	1.67999	1.0039	1.50406	0.412446	0.422875	0.0909046	0.221906	0.111225	0.251291	1.57552	0.469789	2.77099	0.794465	2.73385	1.62454	1.07363	0.0470739	1.45134	1.39977	1.50879	2.76554	0.0306499	0.371806	1.39029
RHBG	0.0101382	0.0506041	0.0221047	0.00601011	0.0223821	0.0707401	0.0883492	0.0111191	0.0810043	0.0239301	0.0228089	0.166201	0.261587	0.420023	0.305543	0.169649	0.0323937	0.318614	0.0642866	0.308971	0.128363	0.0823446	0.111189	0.153436	0.0475375	0.0585631	0.0300079	0.0488384	0.519077	0.101622	0.108424	0.0596312	0.0526221	0.0734454	0.131412	0.0220884	0.160948	0.143435	0.0425586	0.168327	0.146189	0.151127	0.064113	0.258927	0.117846	0.147566	0.023675	0.105193	0.389904
LINC00431	0.0250712	0	0.0273319	0.0297255	0	0	0	1.92478	0.534186	0.039452	0.366634	0.10722	0	0.131481	0	0.451805	0.0534054	0.13132	0.0529926	0.0679174	0	0	0	0	0.033588	0.0965493	0	0.72465	0.570512	0	0.107251	0	0.0371806	0.0454067	1.51656	0.0546236	0.0723668	0.0545705	0.0526227	0.0287079	1.54038	0.0393401	0.761032	0.147765	0.0466284	1.67257	0.0292736	0.0867129	0.0771371
S1PR5	1.67453	52.5142	1.18593	6.4779	6.8001	1.05445	1.41134	1.35395	0.585968	0.990547	2.67428	2.23029	0.212879	0.160251	0.423236	0.550668	0.689969	2.75294	1.07217	0.322837	1.20367	0.737488	0.854587	1.41053	2.05507	1.93773	0.639154	3.46744	1.41388	0.199093	0.516343	2.43784	0.453163	0.653041	0.739363	1.7909	1.0937	1.90223	0.237309	0.587827	0.919562	0.172614	5.53443	5.49899	1.10821	0.459601	0.528051	0.972322	7.0512
BTN3A3	1.77003	1.24432	0.905345	1.32601	1.70628	8.15169	6.99934	6.38231	9.34769	6.51975	12.8536	11.5058	9.70893	3.32837	10.8408	7.64667	3.33464	5.19123	4.07442	5.48056	8.49792	6.68541	6.17447	6.54805	15.7953	4.25247	4.89224	9.04263	5.74747	5.14953	2.62556	5.40326	12.5135	4.95131	1.74732	4.24604	7.58493	4.84885	17.6598	2.7313	3.11249	6.26346	3.11273	3.7394	8.63016	7.72765	4.44133	3.78429	3.68344
RNU4-62P	0	0	0.143808	0	0	0.334705	2.29912	0	0.70266	0.415157	0.741946	0.56414	2.38255	0.553433	3.38347	1.35839	0.140497	0.690944	0.697057	0.893374	0	0	0.361685	0.831848	1.59052	4.23331	4.55525	1.83578	1.00059	0	0.141077	0.705358	0	0	0.325691	0	0.380761	1.72275	0.553753	0	2.31565	4.76075	1.66842	1.03662	0.122669	0	0.462072	1.21665	0.20293
CYP26B1	9.66687	3.04667	14.9038	13.8048	8.91939	0.316684	0.879074	0.157514	0.127502	0.468138	0.234641	0.18036	0.286748	0.559503	0.723585	0.237685	0.244014	1.39704	0.527622	0.759591	0.0577269	0.884796	0.675049	1.41456	1.81869	1.40902	0.323882	1.82297	0.687345	0.128535	0.482728	1.25797	0.613602	0.941345	1.34238	0.245855	2.6156	1.51835	0.226083	0.755691	0.368736	0.150237	1.24557	0.416511	0.171711	2.43884	0.367324	0.567689	0.468175
AKAIN1	1.44715	0	0.867702	0.486143	1.25133	0.183593	0	0.0529054	0	0.379539	0.0271316	0	0	0.0505951	0	0	0	0	0.229411	0.163346	0	0.0839577	0.0661309	0.0912576	0.38775	0.123844	0	0.0258197	0.274424	0.060441	0.0257946	0.0257937	0	0.131047	0.0297749	0	0.0696187	0.682477	0	0.110471	0	0.0756923	0.488088	0.0473844	0	0.292555	0	0.0556133	0
ADARB2	5.99952	8.51043	4.28032	4.90271	6.48754	0.157276	0.305623	0.0536704	0.204188	0.197647	0.627545	0.123242	0.0420883	0.518399	0.213378	0.13018	0.156361	2.12745	0.574062	0.0905866	0.153751	0.789257	0.659689	0.429969	0.97465	0.781027	0.151282	0.660064	0.711444	0.0183944	0.0662912	0.627999	0.0483811	0.106354	0.54571	0.508213	0.303689	0.259185	0.397155	0.425859	0.0368157	0.0563102	1.15121	2.88738	0.109215	0.379885	0.0323783	0.242595	1.16936
WEE1	0.295123	0.173714	0.291383	0.517163	0.278648	5.13106	2.14321	9.87724	4.46892	9.20634	13.4965	2.81266	5.67759	7.60035	3.79675	7.9943	7.30863	5.65827	1.05928	5.35	9.77901	10.327	11.7993	4.41035	2.01916	2.75433	5.1002	1.34122	5.73723	11.0469	10.1893	6.69736	14.6165	13.8668	6.06296	7.12756	2.13233	2.73917	11.4188	6.7714	3.7517	4.71534	2.2443	7.48633	11.0277	9.30278	6.69244	9.60387	4.20883
RPL39P25	0	0	0	0	0	0	0	0.122129	0.889732	0.175229	0.250527	0	0	0	0.285618	1.43337	0.118602	0.583264	0	0.150829	0	0.129208	0.152659	0.421326	0.596732	0.142943	0	0.119207	0	0.279049	0.119091	0	0.16514	0	0	0.121307	0.321422	0.242378	0.116863	0.127508	0	0.524194	0.281681	0	0	0	0	0.25676	0.171304
HMGB1P37	0.0844764	0	0.0613959	0.100159	0.0621663	0.107171	0.981561	0.617664	0.524976	0.576039	0.158379	0.361272	0.326951	0.206742	0.469464	0.579938	0.359895	0.589968	0.714225	0.305126	0.356528	0.424752	0.501845	0.674767	0.33952	0.361465	0.416736	0.120577	0.747568	0.423384	0.361379	0.240911	0.292316	0.509987	0.417142	0.889584	0.568953	0.061291	0.325068	0.386921	0.141231	0.265109	0.284918	0.663849	0.209483	0.444021	0.0986361	0.259711	0.216592
BASP1	218.354	57.6727	209.845	204.633	232.749	12.7571	50.9938	5.01374	23.1558	10.3948	11.0331	7.61941	30.117	100.407	19.8499	13.9991	14.236	82.1247	55.0489	38.9958	4.84242	15.6258	78.206	75.664	40.6116	53.9458	12.2565	44.2591	17.9831	5.30142	7.03984	16.2713	18.6636	11.1372	80.8315	13.9541	53.3615	37.764	18.8655	31.239	11.3865	15.2203	83.402	10.9566	31.5845	14.5802	7.87559	15.2493	79.1783
SMIM30	7.07293	9.9547	7.51351	6.21977	7.61779	23.7294	31.7644	22.7262	54.4654	47.1956	40.1073	26.7798	53.5939	34.3415	36.1091	27.4061	19.7193	22.5504	20.561	29.733	21.682	16.9385	34.1359	20.9892	41.2106	43.9916	39.336	17.6219	25.6929	26.2011	23.9794	15.9502	18.6981	25.2594	17.3513	41.5402	18.6535	28.349	30.4411	40.0285	29.7927	52.5967	30.9326	19.937	38.6645	30.0491	16.4959	29.9478	24.2799
CPNE6	39.1795	14.8503	43.6945	36.3647	45.8593	0.896211	0.149542	0.0345041	4.13616	0.904607	0.102952	0.55448	0.332077	1.3109	0.234744	0.817279	0.810273	0.35953	1.76217	0.313784	0.0643764	0.0929192	0.568526	0.717809	3.19937	3.13531	0.0310398	1.47573	1.03046	0.0322516	0.168229	1.33966	0.0127242	0.57496	0.593154	0.196284	3.94192	3.42385	0.348173	0.058948	3.15221	0.547507	10.6023	1.57326	0.151597	1.50906	0.0467518	1.28265	0.589566
SIGLEC5	0.0615973	0.122984	0.040291	0.0365162	0.135989	0.0468875	1.34198	0.121603	1.37806	0.271403	0.471178	0.439046	0.174828	0.109832	0.963756	0.285438	0.0590452	0.193583	0.221335	0.266985	0.121318	0.614665	0.52356	0.520502	0.866484	0.173955	0.030387	1.56938	0.420507	0.455359	0.428197	0.098811	0.648577	0.267743	0.167291	0.516687	0.275587	0.254741	0.0517154	0.119905	0.21626	0.193309	0.249304	0.25413	0.280675	0.164373	0.158229	0.433191	0.0189518
AL157777.1	0.0564102	0.140784	0.0614968	0.0668823	0	0.0715651	0.245794	0.494944	1.05168	0.266301	0.380735	0.402073	0.218326	0.414165	0.072344	0.145223	0.54073	0	0.89425	0.152814	0.396794	0.261816	0.154668	0.355724	0.226719	0.36206	0.389593	0.362325	0.213942	0.353401	0.301645	0.120653	0.418282	0.102165	0.34819	0.614515	0.244238	0.368351	1.00641	0.193778	0.212195	0.442576	0.285387	0.775764	0.157371	0.273693	0.131731	0.0650347	0.260338
AC024619.4	0.162804	0	0.0591615	0.0643424	0.239616	0.481932	1.65522	1.24989	4.04697	1.79332	1.15988	2.32083	1.33022	1.08147	0.626371	4.19125	1.38719	3.12674	1.54852	3.74878	2.06132	0.944525	0.371986	0.615989	0.872438	1.60223	1.44565	0.522849	3.4989	1.7679	1.10272	0.870537	0.885275	1.27771	0.736928	3.13325	0.626568	2.95302	1.59467	0.994239	0.612411	1.87338	0.823649	2.1323	0.857904	1.11902	0.44355	0.187695	1.33574
MADD	35.638	19.2447	41.8619	35.952	31.5615	7.23804	4.45483	9.4501	3.78922	2.70724	8.57026	6.69611	7.50081	12.5043	5.86083	6.37931	7.09988	9.6565	10.7074	8.36176	4.0839	9.1474	9.71284	6.75795	7.98995	5.22857	5.05377	8.64375	8.52592	5.92924	9.33577	8.79313	9.31952	9.89044	7.25348	4.23812	6.05033	3.36486	9.05342	5.08713	7.95948	2.17447	9.68273	6.70741	9.63726	10.8996	7.19855	7.77756	7.44084
AC018475.1	0.0737578	0.13806	0.0804088	0.0874504	0	2.47969	5.62418	1.98191	4.32174	2.4954	1.90832	1.94517	1.47491	0.928339	1.84454	6.55097	2.16033	1.54534	1.87081	2.14794	2.54221	1.84003	1.87065	2.00001	1.23517	2.55638	1.78291	0.947499	3.49669	2.21799	1.77484	1.65646	2.02358	2.60488	1.82107	4.17818	2.44833	2.32787	0.890172	3.58942	1.6647	3.93502	2.23891	1.81131	1.40607	1.34198	1.72242	1.36055	2.32606
LRRC18	0.0105142	0.0131203	0.0114623	0	0.0116062	0.0933725	0.0916264	0	0.0840091	0.0165452	0.236549	0.0299768	0.93595	0.0441118	0.134841	0.0541359	0.0111984	0.0550721	0.0444475	0.726312	0.251457	0.0731992	0.0288284	0.384557	0.014086	0.0269935	0.0933632	0.0675333	0	0.32935	0.0337339	0.0224884	0.0311852	0.0190424	0.0389392	0.0801771	0.212442	0.434824	0.971019	0.228748	0.237305	0	0.0531929	0.0413125	0.381318	0.102027	0.0245532	0.133339	0
FGF22	1.04843	0.912763	0.770838	0.799798	0.968911	0.0927972	0.0354129	0.0713095	0.151522	0.0767352	0.0457123	0.104272	0.125822	0.102293	0.177192	0.0836925	0.121187	0.12771	0.12884	0.165126	0.0571684	0.443225	0.133704	0.0922523	0.141547	0.0417312	0.0882058	0.0870038	0.0308239	0.254582	0.104303	0.191216	0.132581	0.176634	0.0601989	0	0.0351888	0.0176902	0.0255881	0.0372251	0.27515	0.0127529	0.750392	0.175637	0.13604	0.0394326	0.123365	0.103069	0.0875195
AC093270.2	0	0	0	0	0	0.192286	0.471725	0.0237473	0.230671	0.272578	0.0487136	0	0	0.068131	0.111074	0.222969	0.0922457	0	0.160182	0.0293279	0.0609218	0.0502474	0.148419	0.191157	0.0870235	0.111178	0.0854519	0.0463581	0.0821192	0.0813892	0.0926262	0.0926228	0.064221	0.0392149	0.0534594	0.259462	0.0312493	0.141387	0.0908937	0.148759	0.0271495	0.0339755	0.0273856	0.0850766	0.060405	0.131317	0.0252817	0.0748884	0.233164
RN7SL5P	0.0534227	0.533314	0.2912	0.253361	0.412796	0.677751	4.18998	0.351549	0.42685	3.78297	0.480762	4.18858	0.689212	2.74561	0.274051	2.06298	0.455194	66.3177	1.01627	0.795966	2.5553	0.371925	0.43943	0.673771	1.07356	5.21185	0.527087	0.514705	5.67313	3.01216	0.685607	0.342791	0.237678	3.09614	0.2638	0.465577	0.848112	0.581406	0.504588	1.40696	2.41149	0.33531	1.89191	3.46349	1.49037	0.583197	1.06042	0.369543	12.1631
GBP5	0.0947675	0.0131396	0.0918337	0.0749068	0.0860122	0.959147	1.29384	1.12713	0.897417	1.07702	0.459582	0.93065	0.836804	0.134739	0.704908	0.916245	0.192897	0.551533	0.0712208	1.49185	0.429588	0.713522	0.456159	2.26294	1.37681	0.386576	0.286736	2.99162	1.24598	0.725637	0.333332	0.770238	0.568407	0.343269	0.181984	0.91766	0.56228	0.701328	0.875205	0.0699313	0.401372	0.654293	0.18645	0.322712	0.479798	0.286096	0.494246	0.259787	0.129588
PRIM2	0.455633	0.761146	0.412597	0.38338	0.458335	2.54059	1.8252	3.31264	2.12364	3.82777	3.00912	2.35189	3.3278	4.12762	2.73317	2.95139	3.59657	4.40741	1.46013	4.26033	3.08089	2.40464	4.16593	2.74811	2.62379	3.99512	1.19274	1.31773	2.13218	2.72095	2.72722	2.30273	1.17703	6.54838	4.21403	3.45445	1.86668	1.1597	3.03484	3.96764	1.86136	2.30052	1.52435	0.93123	3.03425	3.44524	2.8488	1.72415	3.21635
FTH1P16	1.02519	2.326	0.982167	1.03134	1.23454	2.75889	24.6364	5.04269	20.106	4.93751	8.21248	7.39582	7.01385	4.98541	7.88865	10.877	2.7794	6.34617	9.35723	13.8861	5.5068	2.27097	5.15336	5.0152	5.57707	6.18125	8.09193	10.2764	8.95456	5.02136	4.48532	5.71443	10.0897	4.55745	5.13908	8.59609	6.94958	12.0364	5.57515	4.48218	6.66108	10.2857	10.0982	6.77468	7.54012	4.37116	5.76753	4.79937	8.60246
RPL7P16	0.0232367	0.0579925	0	0	0.0512999	0.0589588	0.60749	0.254849	0.433212	0.255957	0.209112	0.0331248	0.0599558	0.0731162	0.208602	0.478567	0.0742465	0.243422	0.221018	0.125896	0.163449	0.107848	0.159279	0.175838	0.0311304	0.119313	0.275114	0.174125	0.0881279	0.116459	0.0497019	0.0745501	0.0689201	0.126253	0.0573711	0.278447	0.0670717	0.0505776	0.170703	0.239466	0.116544	0.109385	0.0293895	0.182603	0.0864331	0.140926	0.0542632	0.0535787	0.214479
AL358216.1	1.85251	18.0673	1.70365	2.89584	4.36399	0.485796	0.631321	0.0113506	0.3032	0.55371	2.0024	0.36883	0.0667583	0.564455	0.185815	0.293075	0.231477	2.7104	0.350001	0.0560718	0.0436784	0.132093	0.837092	0.509049	0.970545	1.38164	0.132742	1.82803	1.02052	0.0518691	0.055341	0.940762	0.230219	0.149949	0.459938	1.77004	0.388344	2.99601	0.0868894	0.319963	0.0778603	0.0649574	4.29338	5.10336	0.596686	0.175745	0.0241679	0.298288	5.33349
CLVS2	7.90169	1.22973	7.49592	4.85601	4.78145	0.255728	0.26024	0.0262017	0.174977	0.251408	0.0655057	0.0510845	0.76282	2.12049	0.400213	0.51509	0.580461	0.0625669	0.78585	0.997063	0.0252068	0.0259878	1.22614	1.67036	0.666122	1.14618	0.03241	0.218983	0.203864	0.0430296	0.662699	0.116567	0.0354292	0.281241	1.44697	0.788891	0.34048	0.52975	1.70019	1.68237	0.2359	0.17572	1.11044	0.290409	0.306858	1.51772	0.20921	0.223785	0.562762
AC025211.1	0	0	0	0	0	0.116653	0.200325	0	0.122448	0.289386	0.620609	0	1.72007	1.01265	0.530652	0.473435	0.391735	0.481623	0.534472	0.934091	0.0646784	0.160037	0.0630282	0.753792	0.677523	0.767217	0.362884	0	0.174366	0.345631	0.147507	0	0	0	0.340535	0.300503	0.464467	0.10007	1.78522	1.26346	0.172942	1.08212	0.581486	0	1.15433	0.390361	0	0.583045	0.353631
AC013470.2	0.0138073	0	0	0	0	0	0.120324	0.0151432	1.50772	0.0434544	0.170851	0.177145	0.659079	0.014482	0.424978	0.0710915	0.0147058	0	0.0145922	0.542354	0.0388487	0	0.0567863	0	1.36883	0.141792	0.0136228	0.0295617	0.104732	0.0692005	0.029533	0.014766	0.0409525	0.0500132	0.017045	0.315867	0.13949	2.73485	0.767986	0.0158102	0.50207	0.541639	0.349266	0.0271259	0.154077	0.552675	0.048365	0.0159183	0.0212406
HMGN2P28	0	0.0816764	0	0.155208	0	0.166075	0.285196	0.574287	0.348648	0.102997	0.368141	0.373222	0.0844416	0.205953	0.335765	0.505509	0.418274	0.342835	0.207521	0.531933	0.368321	0.151893	0.628117	0.247649	0.0876878	0.16804	0.129156	0.35034	0.744714	0.328042	0.14	0.0699974	0.194134	0.355628	0.0808013	0.356513	0.283391	0.142467	0.343453	0.524632	0	0.410818	0.165568	0.128589	0.426063	0.158784	0.458545	0.0754601	0.402761
AC110491.1	6.18548	0.447148	7.40361	2.46819	7.86381	0.129885	0.0371748	0.00935716	0	0.201382	0.00959731	0.0364867	0	0.205817	0.0109416	0.10982	0.0636082	0	0.477883	0.0115561	0	0.00989949	0.152052	0.0645613	0.491488	0.492833	0.025253	0.109599	0.0970722	0.0213799	0.0638706	0.118612	0	0.0927111	0.0421292	0.00929417	0.135445	0.297124	0.00895371	0.0293078	0.0427909	0.0267747	0.625864	0.0335227	0	0.124183	0	0.255738	0.0393744
ATP6V0E1P2	0.0699947	0	0.0763063	0	0	0.177598	0.914955	0	0	0	0.157474	0.0997799	0.180602	0	0.179531	0	0.0745496	0.366623	0.66576	0.189614	0.196939	0.162433	0.191914	0.176556	0.187545	0.3594	0.414355	0.14986	0.265463	0	0.149714	0.224563	0.207604	0	0.172816	0.0762501	0.202036	0.304704	0.146914	0	0.70212	0.98848	0.354113	0	0.130179	0	0.326908	0.242088	0
RANP1	0.395131	0.394456	0.229739	0.187394	0.232622	2.47301	5.05029	4.42029	8.13834	5.3473	4.44484	3.79271	2.24295	1.96167	1.68914	3.86548	3.03008	4.00132	2.56123	3.96049	5.63288	2.75087	2.41957	2.72427	2.11744	3.92248	4.02845	1.57917	4.79546	4.71983	2.02839	1.88746	2.14859	1.90834	2.86168	11.3063	2.69925	3.15352	4.42322	4.82611	1.84967	4.38143	2.89859	2.79459	4.45828	2.71591	2.27605	2.24734	4.37655
AC009945.1	0.057546	0	0	0	0	0	0.250743	0.126227	0.919589	0.181109	0.0647335	0.164068	0	0.0603576	0.147601	0.148147	0.122581	0.602837	0.182451	0.389727	0.0809566	0	0.078891	0	0	0	0.17033	0	0.436499	0.144206	0.123087	0.123083	0	0.104222	0.07104	0.188066	0.166104	0.125256	0.181177	0	0.288623	0.270892	0.145566	0.339164	0.160539	0.349005	0.0671917	0.132688	0.177053
ALX3	0.0922469	0	0.080452	0.0218744	0.0305481	0.269168	0.200972	0.050586	0.712488	0.188708	0.0933918	0.946808	0	0.183833	0.899105	0.0474963	0.0884249	0.773084	0.0487452	0.549769	0.50612	0.192665	0.303512	0.197782	0.0988669	0.0710486	0.0819125	0.266628	0.524785	0.242723	0.157848	0.394606	0.0957615	0.0167069	0.136654	0.321571	0.0532533	0.30118	0.019362	0.0633767	0.740267	0.0723739	0.0583362	0.199351	0.0943604	0.81681	0.0753964	0.350956	0.0567636
HMGN2P22	0	0	0	0	0	0.248638	0.853958	0.537368	0.260988	0.616804	0.110232	0.139692	0.379263	0.411122	0.251344	1.26137	0.208739	1.02655	0.103563	0.13273	0.413572	0.341108	0.26868	0.370766	0.262562	0.12579	0.193365	0	0	0.122782	0	0.104796	0.290646	0.177475	0.483884	0.32025	0	0.426586	0.205679	0.561035	0.245742	0.153763	0.123939	0.192516	0.0911252	0.356583	0.228836	0.112975	0.301496
LBX1-AS1	0.00497352	0	0.010844	0	0.0219602	0.0315484	0.0216709	0.0436378	0	0.156527	0.0223789	0.163068	0	2.25875	0.223243	0.0512156	0.143024	0.494962	0.00525623	0.390722	0.636711	0.438587	0.572738	0.00627263	0.0599674	0.300064	0.0637916	0.0532419	0.245214	0	0.0425522	0.117014	0.00737573	0.0090076	0.884127	0.021672	0.222515	0	0.0887321	0.0113899	0.18085	0.0234124	0.00629043	0.439694	0.0184999	0.00603268	0.133565	0.166284	1.73679
AP002812.1	0.180894	0.045146	0.039441	0	0.039936	0.413085	0.63056	0.0396791	0.385426	0.284654	0.203487	0.309444	0.653442	1.13839	0.695968	0.558833	0.231198	0.947496	0.420587	0.245018	0.101793	0.671662	0.79357	1.14072	0.678563	0.789504	0.285561	0.309836	0	0.0906614	0.232152	0.270834	0.053653	0.262095	0.267974	0.039412	0.156642	0.236242	0	0.12428	1.40628	0.340615	0.594857	0.355383	0.403719	0.2633	0.211214	0.45881	0.333935
RPL24P8	0.108536	0.270876	0.157764	0.34316	0.239616	5.92088	14.0299	7.38031	18.5004	15.2005	5.49416	7.63295	3.59393	6.48883	3.94382	9.22075	6.97447	11.9384	9.06174	7.74258	17.4067	4.91153	4.81102	6.57055	6.39788	12.5392	9.06656	2.71107	14.4072	8.38618	4.06266	3.17263	5.31165	6.48684	5.94009	20.0213	3.23727	10.3947	4.55619	8.07819	4.44565	9.70754	7.7789	8.5292	5.04649	3.77396	5.87176	3.83732	14.5262
PCP4L1	28.9384	5.21456	20.5724	22.1598	25.8555	4.00282	0.419783	0.198117	0.513179	5.11658	0.162561	0.841192	0.652525	5.02715	0.386106	0.558048	5.06639	2.52311	7.22903	0.538283	0.999563	0.433172	1.65095	2.3238	5.16274	4.06565	0.261396	3.48076	6.53124	0.0754451	1.00458	2.27954	0.321466	6.32505	2.17051	0.774013	6.63925	22.2542	0.505533	0.27579	0.951301	1.17158	12.9009	1.51417	0.134384	6.71932	0.126551	3.90135	4.5759
GPR61	3.41143	0.909795	3.08688	2.32391	3.12562	0.16348	0.0738791	0.0371918	0.0812846	0.0960517	1.0681	0.091848	0.201244	0.263201	0.191353	0.104761	0.0433411	0.0888102	0.315378	0.110236	0.038165	0.125912	0.139467	0.128306	0.20898	0.23071	0.0401491	0.0871242	0.154333	0.101974	0.163199	0.123302	0.0352028	0.251807	0.10047	0.0812711	0.176188	0.361674	0.0747353	0.120372	0.0765362	0.0744949	0.398876	0.139904	0.362645	0.551175	0.0712708	0.152472	0.213885
CASKIN1	28.4326	5.33436	26.9267	24.2992	23.192	2.66729	0.241077	1.17849	0.263692	0.701093	0.786168	2.46578	1.1909	3.89419	1.54983	1.04953	2.22377	4.57578	4.52087	1.71181	0.942225	2.71659	2.43519	3.05562	2.23929	1.66342	0.620582	0.754387	1.68974	0.966886	2.36685	2.98026	0.53981	1.31848	2.00951	0.834297	3.13939	1.72402	1.65331	2.18403	1.65768	0.219326	3.39944	2.47715	1.44874	2.66322	1.16283	1.98075	1.52309
MPP7	2.98093	0.555193	3.00721	3.29034	2.83009	0.239889	0.121163	0.0213483	0.0740602	0.315053	0.0375364	0.0356761	0.0358743	0.163329	0.0427941	0.050111	0.281359	0.0291301	0.379103	0.0866285	0.0312957	0.0451714	0.0953037	0.129761	0.134112	0.189185	0.0823066	0.404842	0.242562	0.0418098	0.0683995	0.166532	0.0577333	0.171231	0.0823866	0.0817892	0.305004	0.526574	0.0291827	0.0191045	0.0418403	0.113446	0.344667	0.10926	0.0620603	0.637478	0.0616896	0.275704	0.0812772
NTM-AS1	1.75634	15.2199	1.24988	4.7143	5.81622	0.557047	1.80692	0.0535075	0.45478	1.22835	0.658569	0.382513	0.503526	2.04684	0.750814	0	0.155886	1.14993	0.773406	1.51988	0.240221	0.0566088	0.668834	0.615307	3.49678	7.13943	0.120338	2.3241	0.647608	0.0305644	0.104353	0.730442	0.0361757	0.176718	0.361364	1.9133	1.2674	3.87598	0.307203	1.08935	0.36704	0.114831	6.94185	2.92334	0.317577	0.710123	0.0569648	0.168739	5.0285
CHRM4	8.67082	0.963036	6.6441	4.69619	5.57491	0.806303	0.0989031	0.224051	0.272043	0.285747	1.53201	0.744222	0.424611	0.66661	0.334765	0.233741	0.979111	0.594458	0.971543	0.814739	0.159663	0.342388	0.700151	0.529608	0.669004	0.349648	0.123173	0.716817	0.430433	1.10918	0.279166	0.849604	0.353449	1.76771	1.03678	0.135999	0.917253	1.11163	1.46501	0.324888	0.170767	0.106851	1.52156	0.401341	2.75456	1.06	0.50356	0.628051	0.785665
HMGA1P4	0	0.0640695	0.0559732	0	0.226702	0.390823	2.46088	0.112622	0.546981	0.242382	0.46205	0.292767	0.927341	0.376964	0.32923	0.793075	0.109369	0.26893	0.271309	0.278176	0.144461	0.297874	0.492715	0.388528	0.55028	1.51588	1.01314	0.659562	0.389451	0.321658	0.10982	0.219633	0.152285	0.278966	0.063383	0.055932	0.0741002	0.111755	0.107766	0.176373	0.9013	0.402824	0.974075	0.706085	0.381962	0.373665	0.239798	0.473546	0
AC022960.2	1.39044	0.771143	1.34739	1.70962	1.3643	0.0979991	0.112194	0.0282401	0	0.445701	0.202754	0	0.166094	0.486124	0.0660438	0.066288	0.0548488	0.539475	0.244912	0.174382	0.108671	0.0896306	0.0705992	0.0649491	0.241471	0.429688	0	0.0275643	0.0976552	0.0322624	0	0.055073	0.114556	0.0466339	0.158933	0.02805	0.260129	0.0560454	0	0.0589676	0.0322859	0.0404033	0.227967	0.101172	0.0478886	0.0312322	0.180389	0.118742	0.514942
NXF3	0.0243175	0.012138	0.0371144	0	0.0214744	0.0802114	0.445022	0.0213362	0.375642	0.0076532	0.0820643	0.103996	0.106666	0.142832	0.193355	0.137727	0.0466199	0.382116	0.0205598	0.118576	0.0547364	0.231372	0.140017	0.0429371	0.0781879	0.0749174	0.148753	0.197844	0.110672	0.170627	0.109229	0.140432	0.165889	0.0704667	0.0180119	0.100665	0.154421	0.05293	0.00510407	0.122518	0.0548843	0.0534204	0.0861179	0.0668838	0.140203	0.112085	0.119253	0.117749	0.0374091
AKR1B10	0.0196659	0.0122702	0.128636	0.0349751	0.0108542	0.0498986	0.171379	0.032353	0.235698	0.185678	0.0774278	0.0981207	0.773822	0.051567	0.794457	0.101256	0.0418914	0.154511	2.11995	0.532746	0.0276663	0.0798658	0.0134802	0.0744084	0.184426	0.126223	0.727615	0.589471	0.0372926	0.566738	0.0630963	0.0210313	0.0291646	0.0534258	0.0849711	0.0856939	0.425736	7.49093	0.247665	0.48415	0.0369881	0.293156	0.0497464	0.0772714	0.420618	0.11927	0.0803681	0.589489	0
LSP1	2.03599	1.14547	1.07689	1.43105	2.14225	2.31299	15.8328	5.21841	9.44928	2.4691	8.97536	3.01557	3.33556	2.04552	5.29549	10.6792	4.19826	9.71595	1.38301	6.3716	2.34146	3.64495	11.6829	3.88576	2.91911	3.13951	5.11126	17.1133	4.71013	5.99751	3.65509	9.48386	9.95311	3.68165	6.84229	9.61918	10.4334	8.95304	6.29344	2.09856	7.1927	6.93773	15.3019	8.41166	6.57489	4.61552	9.11592	5.39762	5.57033
NKAIN2	14.3059	38.3602	14.1806	14.2791	12.6351	0.603739	1.56427	0.0412052	0.91168	1.19555	4.57377	0.386805	1.3033	0.534168	1.49365	0.612567	0.431273	2.36145	1.52647	1.41922	0.0763451	0.125937	0.749695	1.62684	4.25034	5.48723	0.341849	2.82875	0.96576	0.172605	0.191972	2.59375	0.179531	0.287296	1.06674	2.61029	1.25314	2.85308	0.836762	0.49712	0.240777	0.0982544	5.52267	7.8157	0.95107	0.815216	0.0243709	0.505333	6.42825
C1orf226	0.740122	1.16636	0.54068	0.931799	0.661169	9.86392	4.53813	16.197	2.78407	6.11745	8.35139	9.74579	8.51971	9.33541	11.1798	10.4403	6.04623	8.33282	15.027	7.69435	4.13802	10.0796	6.07221	9.83968	5.48416	3.30566	5.9924	3.75324	6.32297	10.4494	27.3203	11.0158	11.2985	4.91956	8.70817	5.97219	11.1441	9.71562	5.46515	5.58726	10.9115	8.9855	7.7831	4.08481	5.91402	5.74737	7.84889	3.699	5.01794
AP001999.1	0.51204	0.116174	0.842393	2.63259	0.534388	0.0295274	0.0405653	0.0102106	1.66128	1.72137	0.146617	0.00663574	0.108096	0.0683529	0	0.0599183	0.11403	0.0731455	0.191861	0.0189151	1.55202	0.0162036	0.0319076	0	0.473952	0.316694	0.0137781	0.667738	0.0529628	0	0.00995657	0.139387	0.0138065	1.34046	0.0114929	0.0101418	0.288878	0.121584	1.48998	0.0479712	0.0700405	0.0292167	0.211949	0.0182901	0	0.050816	0.032611	0.0912321	0.0644484
AC131238.1	0.0522826	0	0	0.0619884	0	0.331643	0	0.114682	0.139247	0	0.235251	0.372653	0.134901	0.219349	0.201152	0.134597	0	0.547699	0.276272	0.0708163	0.147104	0.121329	0.286702	0.131878	0.0700433	0.201341	0.154751	0.0559689	0.198288	0.393051	0.0559146	0.111825	0	0.0946896	0	0.22782	0	0.113799	0.164606	0	0.196669	0.0820384	0.727389	0.102714	0.291712	0.19025	0	0.060276	0.321718
AC026798.1	0	0	0	0	0	0.361092	0.620094	0.156082	0.379028	0.503873	0.0800439	0.304308	0.137699	0.11195	0.0912556	0.091593	0.151574	0.186354	0.112802	0.144571	0.400416	0.0825643	0.1951	0.0897429	0.0953286	0.182682	0.140411	0.11426	0.539738	0.401205	0	0.0380484	0	0.128872	0.219605	0.581367	0	0.0774403	0.112014	0.325912	0.0892217	0.111654	0.224994	0.139794	0.165424	0.129465	0.124625	0.0410177	0.164196
AC104339.1	0.0492779	0	0.0537214	0.0584259	0.0543956	0.3751	1.07358	0.486411	0.918708	0.930524	0.332596	0.351237	0.445017	0.103371	0.189591	0.634308	0.524846	0.774333	0.885342	0.867703	0.623924	0.114356	0.202668	0.310748	0.528142	0.379539	0.777907	0.0527523	0.934459	0.370461	0.579712	0.316195	0.730791	0.446238	0.790831	1.181	0.284477	1.60889	0.568869	0.28213	0.741463	1.70112	0.560933	0.387245	0.274947	0.179316	0.402764	0.568119	0.379036
GPX3	9.79693	2.55059	6.22971	5.93317	7.42703	14.1554	229.149	7.7836	240.364	133.066	8.06265	14.19	23.5366	76.1828	80.5931	158.628	149.455	73.579	338.92	117.997	287.281	33.7001	61.4013	22.8657	19.0156	21.5121	41.9537	152.504	605.435	47.7219	14.6929	17.5566	176.589	17.0069	14.4836	33.9133	25.4772	139.003	28.3183	409.294	11.7607	61.9502	48.0143	23.0602	26.5849	11.732	225.237	25.5336	49.9677
AC241584.1	0.0276369	0.0172435	0.0150645	0.0163837	0.0152535	0.0876543	0	0.242487	0.147213	0.0434894	0.124355	0.059096	0.106964	0.0724681	0.0886083	0.177872	0.0588707	0	0.116831	0.0374339	0.0972	0.0801692	0.037888	0.174279	0.0740506	0.0709532	0.122704	0.0295855	0.314448	0.121199	0.147784	0.0738893	0.122957	0.150161	0.0852939	0.180641	0.0797726	0.0902326	0.232032	0.0949374	0.0173267	0.151781	0.0524321	0.0271477	0.1028	0.0335224	0.112943	0.0477934	0.0637733
ADGRA1-AS1	1.68354	0.406739	1.50761	1.34698	1.5929	0.216795	0	0.149241	0.0337132	0.094615	0.0569569	0.162402	0.0367435	1.23141	0.243505	0.0896154	0.306714	0.348086	0.806008	0.162881	0.0534233	0.143204	0.659429	0.598673	0.784319	0.467157	0.012489	0.010163	0.0960153	0.0158603	0.128607	0.351963	0.0187721	0.097433	0.500046	0.0241316	0.347104	0.110209	0.0199265	0.33337	0.579324	0	0.368228	0.36059	0.173624	0.568094	0.166274	0.211606	0.155783
C4orf50	3.39654	0.525818	3.02072	2.27469	2.39263	0.0445484	0.0417282	0.0105033	0.0425102	0.0200932	0.0143638	0	0.0453017	0.177455	0.0532211	0.0328725	0.0407997	0.234087	0.1923	0.0216193	0	0.00740804	0.0656446	0.060391	0.427666	0.0983465	0.00944871	0.136692	0.0605346	0.00399977	0.040968	0.0512081	0	0.0173445	0.0315263	0.0104326	0.0829282	0.0555864	0.023451	0.0109659	0.108073	0.0350634	0.298774	0.0689861	0.0148426	0.197475	0	0.0515241	0.0638405
KIRREL1	0.973764	0.421351	0.800334	2.82822	0.961873	8.52599	4.72703	12.8635	2.47163	2.31047	6.24641	4.38489	4.41237	5.66879	10.3984	8.88901	6.88405	4.13056	2.80647	4.84501	1.94606	8.93286	8.89073	5.91804	1.3425	1.79249	7.10137	6.38745	8.08849	6.65183	9.1234	3.5621	7.78259	8.67199	5.15264	3.31052	9.54514	1.3324	3.9917	3.75164	2.91452	1.95183	0.917502	2.20836	1.61252	5.16846	9.74703	12.4219	4.01142
ABCC6P2	0.047768	0.0596078	0.0173584	0.0566357	0.0878814	0.909017	0.485654	0.506433	0.254445	0.651453	0.394051	0.612854	0.924388	0.634624	0.183782	0.778838	0.407012	0.417004	0.757248	0.754847	1.34401	0.147803	0.196458	0.46188	0.277312	0.245273	0.377036	0.0852266	0.362331	0.738171	0.493835	0.255422	0.28336	0.317215	0.21622	0.988702	0.1149	0.86644	0.267364	0.218788	0.479163	0.199878	0.362497	0.218972	1.16974	0.251076	0.390423	0.715925	0.171463
YBX1P10	0.844244	1.40467	0.536883	0.854995	0.563036	7.49738	5.9777	7.38812	9.27512	5.03724	6.56869	7.47172	5.85427	11.2716	6.99252	10.8672	7.11853	9.85746	6.41292	5.33642	11.6048	6.65307	10.4165	10.204	5.1368	6.47979	4.11274	2.59834	6.00354	8.55063	4.51446	4.10048	6.28615	7.80437	9.1845	17.2059	4.21375	4.90027	5.8144	10.9157	2.53618	4.80215	2.82518	4.63026	9.56815	5.80286	5.70916	3.44717	10.3088
GRASP	16.7123	5.14368	18.4505	36.6756	19.4114	3.40679	4.72786	2.55957	2.85758	2.6327	3.10259	4.19964	1.8847	7.31797	8.10049	3.35517	2.93112	2.69881	5.22115	3.7276	2.95061	2.67979	2.91688	4.36536	8.11284	6.03049	4.19847	3.40031	9.72472	2.09627	2.00969	4.77769	3.15534	1.35036	3.71166	2.17915	6.47388	4.38046	2.85	3.0263	3.11629	2.6823	13.6546	6.47845	1.49943	3.79397	2.68249	5.23441	4.97964
AC004000.1	0	0	0	0.0469566	0.131152	0	0.690266	0	0.10548	0.0623215	0.089102	0.451659	0.204376	0.415394	0.355538	0	0	1.4521	0.0837112	0.375506	0.0557161	0.183815	0.217178	0.0499493	0.58364	0.864261	0.273525	0.0423968	0.150204	0.049623	0.338845	0.381187	0	0.286912	0.0488913	0	0	0.172408	0.0415634	0	0.64557	0.80788	0.250455	0.23342	0.294631	0.096077	0	0.684892	0.182778
CDCP1	0.292532	0.0690615	0.344768	0.306217	0.194911	0.782366	6.04017	0.858451	2.11975	0.393975	14.6599	0.649941	3.60738	0.760152	1.139	3.01239	0.665241	1.33899	0.325872	2.96281	0.407831	0.669688	3.13244	1.74832	1.01684	0.825454	5.19779	5.72147	1.0395	7.67078	1.10767	1.41202	3.94351	1.06439	0.907701	1.40102	1.84851	0.854712	1.0427	0.549223	0.50559	0.918044	1.00664	0.538465	5.19555	1.55358	1.92631	1.49791	0.689219
B3GNT5	0.594095	0.454799	0.546612	0.794305	0.948808	3.55202	2.83647	3.66684	3.14212	3.87208	3.4979	2.51668	3.15548	1.09157	2.24519	5.07103	3.1189	2.20695	0.950703	3.68391	2.39176	7.94942	3.01523	0.98575	0.79309	1.11959	1.96216	3.14608	2.61272	4.48741	6.29283	2.67204	2.41193	4.78846	1.56824	4.34443	1.32261	1.43069	1.85497	0.371496	2.98762	3.06771	0.988547	2.45434	3.53222	2.06474	2.77962	4.48116	0.913932
AC069271.1	0	0	0	0.260669	0	0.976221	0	0.36169	1.46388	2.76771	0.989261	0.626822	0.709093	0.576493	0.422934	1.41499	0.819567	2.30315	0.580881	1.63785	0.773239	0.892858	0.452106	0.554565	0.736352	0.987773	1.40996	0.353035	2.50148	0.964149	0.470256	0.23512	0	1.39364	0	2.27528	0.15865	1.43562	0.807556	0.881113	0.68918	1.03495	1.11228	0.863854	0.511119	0.266675	0.513414	1.52081	0.507325
GIMAP2	1.01404	1.24497	1.68496	0.620535	0.884648	5.75797	26.083	4.25128	19.711	9.09801	3.78084	8.40516	11.4891	3.67966	5.77869	6.44217	4.09365	4.32622	3.24096	8.04165	7.24787	4.56411	3.27362	4.77529	7.47182	7.39023	5.08311	14.1382	8.96332	4.29325	3.90938	5.50092	7.43421	3.52496	2.25126	9.45199	5.35825	12.6735	13.7487	1.69488	5.77295	14.205	7.32289	4.70733	4.74529	3.63045	5.03204	6.40162	4.47858
XRCC6P2	0.0658841	0.0352347	0.0923465	0.0892742	0.135063	1.0866	1.47638	2.05421	1.90513	0.844213	1.43991	1.11362	0.388561	0.868726	0.62767	1.1146	1.36333	0.93668	0.954914	0.739412	1.21817	0.91736	0.954833	0.937769	0.693513	1.23235	0.984339	0.564235	1.42785	1.03778	0.775071	0.603929	0.683943	0.98868	0.964382	2.21468	1.00519	0.635079	1.88662	0.883738	0.873315	0.959967	0.94043	0.813597	1.09405	0.627902	1.21985	0.43404	1.34655
REPS2	16.8106	10.8519	15.1944	11.3228	11.2028	0.490472	0.944669	0.164617	0.411868	0.58928	0.6856	0.133998	1.42393	0.464334	0.814684	0.234185	0.303577	1.93765	3.19176	0.788564	0.0639865	0.19175	0.455184	2.73051	1.30196	1.68345	0.311135	1.78693	0.592251	0.336235	0.371308	0.604771	0.33501	0.461301	0.692501	0.378217	2.47254	1.1748	1.06445	1.11627	0.180597	0.242656	1.6721	1.00675	0.389121	1.21005	0.182334	0.548842	1.23846
NUPR1	2.17306	3.42825	2.07576	2.0712	1.88496	3.98	16.3428	6.53005	27.0625	18.0631	12.4535	7.66471	12.0015	5.43338	10.1164	16.7519	4.06883	10.9864	19.679	9.84948	2.01113	11.8602	10.259	6.00355	19.8524	7.60803	9.26486	14.0968	13.6404	9.62246	3.34542	7.4049	16.7586	2.45772	4.06684	13.1171	6.28987	33.4712	23.0941	13.8499	19.8274	24.9927	13.5664	13.4726	13.4231	7.74985	7.70365	5.27888	6.16515
AC023886.2	0	0.208265	0.0454867	0.19788	0.0921151	1.74682	2.72706	1.23555	2.00027	2.56064	0.938715	1.60595	2.0455	1.48794	1.81934	2.25573	1.51094	2.62256	1.41107	1.80848	2.40664	1.21034	1.65882	1.3682	1.28566	3.69565	1.89366	0.982656	2.21542	1.56838	1.24944	1.82947	1.11379	0.906809	2.26637	3.18173	1.80653	0.908181	1.88289	2.29328	1.09866	1.70225	1.63594	1.1476	1.78481	1.61952	0.876926	0.577242	2.05399
MYADML2	2.93719	0.417885	2.22089	1.40621	1.70197	0.141616	0.0303992	0.122427	0.390208	0.153699	0.0470885	0.109401	0.144011	0.32929	0.0357894	0.125726	0.312089	0.109629	0.147465	0.311845	0.225743	0.226665	0.133903	0.149584	0.280401	0.232849	0.0826012	0.0672173	0.264599	0.11364	0.238763	0.164144	0.0517322	0.189533	0.12919	0.0912023	0.251723	0.531497	0.248941	0.215695	0.393657	0.0875789	1.0677	0.219302	0.0778531	0.41466	0.138484	0.0804334	0.214653
PGF	0.460213	0.678372	0.272806	1.2925	0.419107	4.51756	6.42939	3.94013	2.50504	0.968607	2.89262	5.10489	2.34893	3.27632	3.67404	3.82832	2.73265	5.13746	21.2332	5.32968	4.93265	3.94155	4.09701	11.8334	18.9011	2.89104	11.1103	2.68193	11.2034	0.681147	3.70061	3.8635	2.27357	1.64095	5.79492	3.18666	12.3955	4.70178	0.371289	7.38746	5.33774	1.72861	3.74344	1.37315	1.8857	3.93196	6.92178	4.51652	15.1462
AC016739.1	0.894715	2.04688	0.975394	1.35548	1.53632	28.1879	68.2238	38.7061	70.9585	44.9753	35.7854	52.2225	14.3644	27.6316	22.3751	39.669	37.3764	39.8344	49.1172	41.002	66.6411	16.0914	16.4226	35.1064	28.3681	41.1552	36.3892	17.9853	60.7025	48.7033	21.9017	24.5056	26.7584	28.2675	31.1106	59.7801	17.8626	45.7652	29.5776	59.0794	30.9136	53.1933	44.6362	30.6631	23.2964	19.5948	30.1798	24.2404	58.8791
AC093734.1	0	0	0.0772522	0	0	0.1798	0.308766	0	0.188731	0.223018	0.0797132	0.505084	0.639942	0.891896	0.181757	0.182429	0	0	0.224671	0.0959824	0	0.328892	0.29144	0.178744	0.474674	0	0.279661	0.303435	0.268754	0.266365	0.0757851	0.0757823	0	0.513359	0	0.0771953	0	0.308481	0	0	0.977383	0	0.806631	0	0.329482	0.601672	0	0.245089	0.436048
AL391219.1	0.0355046	0	0.0387061	0	0	0.0900861	0.928215	0.155759	0.851048	0.50283	0.159756	0.202452	0	0.148957	0.182133	0.731227	0.189075	0	0.337705	0.432815	0.149845	0.12359	0.146022	0.268671	0.142697	0.273456	0.28024	0.0760157	0.53862	0.22243	0.151884	0.113909	0.263266	0.257211	0.17532	0.193388	0.102482	0.30912	0.149043	0.284583	0.222592	0.222846	0.449056	0.279009	0.132066	0.172262	0.29019	0.0818656	0.382332
RPL13AP25	1.37302	2.86721	1.40518	1.16279	2.59819	14.1839	28.4478	16.8103	23.4335	52.7358	11.0322	12.5825	6.18162	5.84858	9.77448	12.0469	14.6833	9.98029	16.8205	19.5462	26.5691	15.7688	13.445	18.8009	15.9543	23.5239	12.9937	8.60897	15.7282	10.1816	11.4775	13.6946	16.705	31.0582	18.368	30.8912	7.7241	19.517	9.64543	13.4437	12.9998	39.2197	14.0343	7.43169	6.33186	6.76362	15.1482	7.72085	20.8202
COL6A1	15.6723	9.58018	16.5222	23.4146	15.4718	67.625	130.927	125.234	46.0149	36.753	36.0178	72.0525	34.5044	70.4988	157.846	148.333	93.6751	64.0173	24.7345	75.7912	91.4476	107.553	129.274	34.7028	25.2875	21.8319	94.0594	72.1084	61.2162	59.6104	208.708	164.508	309.595	36.8943	62.2498	36.5933	123.886	21.2305	18.5056	35.7443	53.2108	21.4342	26.1263	186.284	21.7341	44.7898	194.104	76.6918	28.0843
NBPF14	0.172676	0.121867	0.197505	0.142641	0.20467	0.615899	0.684555	0.87706	0.836859	0.697125	0.657561	0.918039	0.204511	0.678431	0.954779	0.961953	0.41908	0.615325	0.951348	0.65757	0.874125	1.24321	0.73152	0.640844	0.540413	0.347023	1.23586	0.837889	0.50459	0.489464	1.46829	0.8764	0.537345	1.59187	0.386147	0.572033	0.371773	0.406658	0.398084	0.931894	1.33813	0.3398	0.656984	0.761897	1.19905	1.1142	0.647827	0.690239	0.213381
CDH12	2.22587	0.353051	2.19997	0.804389	1.63165	0.0952274	0	0.00633262	0.00768905	0.104488	0.00974272	0.0205775	0.137807	0.0817572	0.0185123	0.0148646	0.021524	0.226825	0.131197	0.0625663	0.479252	0.020099	0.0158313	0.0364109	0.119899	0.144531	0.0199388	0.0309054	0.0328477	0.0036173	0.0123502	0.0771857	0.0085628	0.0575152	0.0249477	0.015725	0.108331	0.169665	0.00908937	0.00330576	0.0289595	0.0181203	0.186222	0.0623895	0.0187927	0.161083	0	0.0931945	0.0488535
PIGCP1	11.9945	6.74255	12.0734	11.0634	10.5541	3.01421	1.50277	1.95434	1.47991	1.62816	2.608	1.39302	1.21124	2.21064	2.92415	1.72645	3.32641	3.91406	1.84272	5.06079	1.18604	3.75727	3.91388	2.94818	0.718746	1.86928	1.32331	3.81514	3.05208	2.30472	3.56554	3.83179	3.15408	4.44184	3.38246	1.69071	2.82061	1.96015	3.45863	2.83025	2.13823	0.992161	1.93872	2.82321	2.17377	3.27698	1.96876	2.71707	2.5644
LINC00621	1.22387	0.218174	1.17539	0.587337	0.723734	0.0369682	0.0634845	0.0159795	0.0388045	0.16049	0.278624	0	0.131577	0.244507	0.0186853	0	0.0310359	0.0763149	0.246368	0.0986735	0	0.0845284	0.299612	0.367511	0.117116	0.0935142	0.230001	0.0155971	0	0	0.015582	0.0934885	0.0432141	0.0263876	0.233823	0.0793597	0.189248	0.158565	0.137615	0.383715	0.0182688	0	0.0921385	0	0.10839	0.212071	0	0.0671896	0.112068
RPL23AP77	0	0	0	0	0	0.0469888	0.161385	0.44684	0.295937	0.116567	0.0833287	0	0.238917	0.271935	0.237501	0.0953516	0.157794	0.194001	0.156574	0	0.416848	0.214881	0.0507765	0.0467128	0.0496203	0	0.0365432	0.0396497	0.280943	0.324854	0.158445	0.0792195	0.109855	0.134161	0	0.24209	0	0.241855	0.0777406	0.127233	0.0464415	0.464944	0.0936908	0.436592	0.0344426	0.0449259	0.216232	0.170804	0.170934
AC067931.1	0.0255569	0.0956746	0.0278615	0.0909041	0.112844	0.162115	0.334074	0.308326	0.068067	0.402164	0.402486	0.619349	0.296741	0.536113	0.0983275	0.460558	0.16332	0.803183	0.135048	0.761565	0.287631	0.296542	1.40146	0.322325	0	0.328066	0.252153	0.0273589	0.0969276	0.352242	0.081997	0.109325	0.113703	0.416578	0.567897	1.16932	0.0737689	0.111256	0.0804633	0.409698	0.128181	0.120307	0.355564	0.100418	0.451552	0.402994	0.208885	0.265179	0.353842
RPL21P7	0.0355046	0.0443048	0.0387061	0.0841913	0.0391918	0.180172	0.154702	0.194699	0.945609	0.44696	0.279574	0	0.0458047	0.0372393	0	0.365613	0.37815	0	0.187614	0.432815	0.249742	0.164787	0.194696	0.31345	0.285394	0.319032	0.14012	0.152032	0.673275	0.177944	0.227826	0.0379696	0.263266	0.321514	0.21915	0.502808	0.102482	0.23184	0.223565	0.365892	0.133555	0.557114	0.359245	0.279009	0.231115	0.172262	0.373102	0.122798	0.327713
TXLNB	0.611337	0.247064	0.522567	0.387123	0.498451	1.54675	1.30161	0.457149	1.61895	2.38314	2.22328	0.891289	5.93311	2.03656	2.44115	5.33851	1.33553	0.81872	1.08293	2.07012	0.747647	1.69679	2.24286	0.968158	1.79624	0.374542	3.39281	0.743683	2.02874	0.805155	1.00671	3.20205	2.35926	0.452945	0.317313	2.28928	7.4093	1.65575	1.06079	0.739789	1.90329	2.6925	3.08845	4.21726	2.81663	2.00971	1.37084	2.43478	0.523663
DCN	5.26061	1.68069	5.51232	4.36493	4.04025	13.2987	70.1439	5.59976	68.0526	35.8724	7.8727	48.8959	4.12441	5.21523	4.75733	4.39519	11.8556	1.63606	4.84863	6.4872	32.4008	9.68956	5.28676	8.57916	2.56441	9.08322	10.3885	33.0603	30.8359	3.20119	18.8268	3.22476	4.27191	1.24504	4.09161	85.8114	1.61824	21.1168	4.93386	5.49026	5.13166	5.20913	4.52798	10.0806	1.55162	5.80936	7.61524	10.874	6.67171
IGLC3	0.0371184	0	0.283258	0	1.96672	0.188362	60.4887	0.122129	62.2813	30.2561	0.501054	1.79906	11.2534	0	5.52195	1.05114	0.355805	6.4159	0.274598	37.104	1.46212	0.172277	0.457978	0.187256	2.43666	12.0072	4.02845	10.2518	4.22327	0.558098	0.238182	0.079391	0.275233	0.336128	0.229112	0.363921	0.749984	100.91	2.10354	0.212513	2.18748	0.524194	0.657255	0.145846	1.58779	0.180092	0.476741	0.12838	0.0571015
AC021188.1	0.278087	0.289179	0.328426	0.13738	0.486032	1.08779	0.403899	0.83873	1.60472	3.93838	0.391026	2.74192	2.60103	3.57301	1.30767	1.6108	1.08601	2.91317	2.93894	0.941665	4.499	3.84515	2.35095	1.92899	0.993479	0.535457	0.960295	0.57058	2.37302	1.65506	2.50316	0.570006	2.13075	2.35035	2.43168	1.48945	1.60537	2.16896	2.74818	3.39654	1.54004	4.18174	1.20171	1.18371	2.62909	2.72657	0.94704	2.16407	2.88764
HTR1E	2.31491	0.375425	3.20695	1.64481	2.29702	0.0954201	0	0.00916564	0	0.039452	0	0.0119133	0	0.0876539	0	0.0215145	0.0623063	0	0.123649	0.0226391	0	0.00969687	0.0458275	0.0421599	0.145548	0.214554	0.00824536	0.0357852	0.0633902	0	0.0357505	0.0446865	0	0.0302712	0.0309502	0	0.10855	0.472944	0	0	0.0104788	0.0131134	0.486215	0.114928	0.0077714	0.0506839	0.00975786	0.0289043	0.0642809
UBA52P3	0	0.168057	0.19576	0.0532257	0.0495541	0.512571	2.54287	0.689294	1.07606	0.565135	0.302994	0.895929	0.347493	0.188341	0.345433	0.693421	0.669385	0	0.569324	0.54725	0.694701	0.260445	0.307716	0.452943	0.841986	0.403384	0.575794	0.384457	0.510773	0.899969	0.480105	0.672122	0.865471	0.162608	0.443349	1.2715	0.518313	0.195425	0.848024	0.462633	0.450313	0.633973	0.681343	0.705557	0.584442	0.490068	0.786249	0.207021	0.897779
TINCR	7.86874	1.25397	5.63471	3.84887	5.67648	0.266058	0.171336	0.273134	0.197819	0.268133	0.403014	0.193077	0.33256	0.994417	1.00297	0.528649	0.358313	0.297502	1.38985	0.461596	0.239714	0.314312	0.77267	0.754915	1.48089	0.611323	0.193981	0.271274	0.463968	0.268242	0.261666	0.5934	0.278613	0.767553	0.64184	0.133268	0.636865	0.73226	0.247602	0.42024	0.252003	0.102835	3.67477	1.15878	0.357536	0.678341	0.224463	0.418078	0.645239
CSMD3	1.47999	0.263237	1.36984	1.08151	0.999543	0.0412542	0.0254315	0.00548681	0.0155448	0.0564187	0.0412693	0.0178291	0.470076	0.195021	0.14008	0.0171723	0.0337461	1.33203	1.06889	0.287989	0.00938398	0.00483736	0.140598	0.913831	0.160854	0.432408	0.0394873	0.0303479	0.0569208	0.0052236	0.0196178	0.0624181	0.0210209	0.0483232	0.318059	0.0217995	0.606492	0.0798539	0.532025	0.0525109	0.00522741	0.0130834	0.109676	0.0966465	0.00930437	0.12642	0.00292067	0.0403735	0.247557
AL163973.1	0	0	0	0	0	0.15082	0.517999	0.130384	0.474935	0.561217	0.100298	0.593145	0.0383426	0.12469	0.0762308	0.459076	0.316545	0.311344	0.188459	0.241536	0.585357	0.172426	0.244467	0.0749672	0.159267	0.267058	0.322555	0	0.789027	0.0372388	0.0635702	0.0953518	0.0881509	0.053827	0.146759	0.485648	0.214467	0.388141	0.0623811	0.0680632	0.18633	0.419718	0.18795	0.175166	0.11055	0.0360497	0.0694043	0.0685287	0.274325
APOBEC3B	0.0452234	0.045146	0.0690218	0.0536187	0.04992	1.59497	1.1823	2.59898	2.09575	2.81807	3.82556	2.61738	0.291715	2.40959	1.31074	1.83949	1.76289	1.89499	0.152941	2.43793	3.09198	0.860567	1.27715	0.615989	0.460453	1.61384	1.41888	0.64872	2.05818	3.21848	2.93092	1.16072	0.335331	2.4899	1.64134	0.581326	0.783211	0.80716	3.17035	3.3452	1.45164	2.0295	1.02956	0.621921	5.76141	1.82116	1.85869	1.27215	3.82634
ACTG1P21	0.0171487	0	0	0	0	0.0870232	0.298885	0.319734	0.137019	0.134926	0.192906	0.171122	0.176989	0.197852	0.0659778	0.309035	0.23744	0.0898227	0.181235	0.116139	0.265376	0.159184	0.164567	0.10814	0.137845	0.132079	0.287631	0.220294	0.130077	0.365275	0.16506	0.128375	0.228884	0.0621164	0.275209	0.224175	0.123747	0.0746525	0.143976	0.137454	0.150517	0.242177	0.130136	0.269523	0.239204	0.228807	0.140162	0.217476	0.316571
GPNMB	6.49842	0.829956	5.91989	2.34865	10.7552	15.0238	73.9937	7.06717	35.7654	15.6085	73.0846	7.66299	15.1775	28.822	47.4118	39.1297	6.82624	24.0542	0.721166	15.6892	3.49562	15.8122	35.7814	11.5947	32.6985	26.4225	10.9141	90.9876	12.525	21.6708	8.11689	18.0406	31.6058	12.6923	14.9817	50.0718	15.6533	12.0953	13.8513	18.6537	7.09768	9.18941	65.9968	13.0327	216.044	8.29093	22.5109	15.276	17.7393
RN7SKP180	0	0	0	0	0	0.0659267	0.226428	0	0	0.572413	0	0.074079	0.268166	0.10901	0	0.133781	0.0553474	8.43789	0.219678	0.0703871	0.0731062	0.120594	0	0.131079	0.0696188	0.333534	0	0.0556297	0.394172	0.260446	0	0	0	0.0941158	0	0.11322	0	0.339329	0	0.0595037	0.195477	0.163082	0.0657255	0.102092	0.096648	0.126065	0.121352	0	1.35902
RPS10	22.4437	28.9971	25.1848	24.4928	30.1122	133.701	206.325	99.1251	208.532	358.367	61.9132	126.861	107.196	60.1816	69.0851	72.0561	133.448	60.5017	104.811	202.613	282.654	103.574	106.795	146.338	75.7365	249.76	117.911	56.6386	158.12	153.783	75.1471	62.3224	90.5747	201.424	133.634	218.68	64.7827	221.116	74.2128	239.581	129.119	246.176	159.368	82.5023	99.1972	91.7535	126.76	68.1614	250.65
HMGA1P7	0.273286	5.66951	0.521376	1.21507	0.754169	0	0	0.0374659	0	0	0	0	0.176284	0.10749	0.394289	0.0879439	0	0.715718	0.722051	0.185082	0	0.15855	0	1.20635	0.137296	0.613915	0	0.146277	0	0	0	0	0.101321	0	0.337369	0.0372137	0.197207	0	0	0.625856	0	0	0.043206	0.134224	0	0	0	0	0.157655
DBNDD2	5.48461	111.169	4.59936	14.3002	15.2108	2.39282	5.05531	1.49701	2.42906	3.33898	6.89548	3.36089	2.93755	1.80256	2.1006	1.22988	2.30621	5.55704	4.30137	1.81519	1.80676	1.87893	3.84454	4.60887	7.73841	6.45106	1.67114	7.75092	3.03544	3.69255	2.65412	6.5289	1.79419	1.73045	3.63044	6.83313	2.56091	7.3194	0.735766	3.67291	2.43497	1.92761	13.6226	14.834	4.10212	1.9717	2.36163	2.91837	25.436
FADS6	3.31466	0.613329	3.00584	2.3452	2.35546	0.0608341	0.0783516	0.00657388	0	0.0754567	0.0134852	0.00854459	0	0.0817286	0.00768703	0	0.038304	0.0627911	0.09502	0.0243562	0.0168648	0.0139098	0.0246517	0.0302384	0.120452	0.100025	0	0.0641657	0.0227327	0.0150204	0.0128207	0.0897415	0	0.0542786	0.014799	0.0195889	0.27682	0.143512	0	0.0137268	0.00751571	0	0.14404	0.0471029	0.00557389	0.101786	0.0139973	0.0829243	0.10143
SMPX	2.2755	0.164609	1.83355	1.44671	1.32872	0.146433	0.0718474	0	0	0.467052	0.0370973	0	0	0.155653	0	0.0424498	0.0175622	0	0.0348528	0.0670031	0	0.0191327	0.0226053	0.103981	0.265087	0.169332	0.0162687	0	0.187611	0.0206604	0.0352692	0.017634	0	0	0	0	0.19038	0.897265	0	0	0.0206754	0	0.959339	0.0647891	0.122669	0.0200006	0.019253	0.0950507	0.126831
AC092809.3	0.371184	0.185275	0.404655	0.264055	0.409733	2.16616	3.88163	1.79123	5.53611	3.73821	4.09194	2.53985	1.34083	2.56951	2.28494	3.24897	1.50229	3.88843	3.29518	2.41327	3.13312	2.67029	1.83191	1.49805	1.88965	2.0012	4.24818	1.58942	1.97086	2.69747	1.90545	2.46112	2.42205	1.88231	1.6496	2.99224	2.57137	2.42378	4.3629	2.12513	3.16486	1.8638	2.53513	2.62522	2.96847	3.60185	1.21352	2.22526	2.51247
AL357060.1	0.0587284	0.0157039	0.0503047	0.0198945	0.0416749	0.596049	0.584902	0.11962	0.346346	0.363059	0.320881	0.173419	0.357183	0.224392	0.537979	0.410376	0.361897	0.615224	0.0753667	0.477282	0.182944	2.97886	0.26454	0.264531	0.202317	0.145391	0.252468	0.363743	0.429559	0.157682	0.60565	0.520392	0.223957	0.341883	0.295178	0.132524	0.369304	0.365227	0.299362	0.129691	0.47339	0.302788	0.153863	0.304927	0.167739	0.335823	0.352658	0.299847	0.161331
AC023512.1	0.0687323	0	0.112395	0	0.151741	0.915574	2.54562	2.52531	6.3155	3.19063	1.62366	1.86162	0.931057	0.360452	1.27813	4.5121	1.06147	0.720021	1.63438	1.6292	2.41734	0.996893	1.0836	1.12691	0.874769	1.8087	1.93269	0.772573	3.91012	1.76544	0.918837	1.10256	1.47799	1.18258	0.80607	3.81862	1.53754	2.61807	2.77709	1.10183	0.991094	2.10308	0.869315	2.09299	0.894817	0.79201	0.682151	1.06975	1.74463
SRCIN1	15.56	50.216	14.2049	20.7735	16.8285	1.36977	0.929369	0.801811	0.368267	0.52776	3.58741	0.941524	1.82751	4.2305	1.95251	0.469577	1.21576	3.70601	1.33384	1.69755	0.531836	2.67969	2.21221	3.43585	4.93064	4.56579	0.240919	2.45653	1.23851	0.610063	1.26011	2.71204	0.641351	0.737959	3.49382	0.713087	3.65149	1.30632	0.600516	1.1521	0.756219	0.249282	5.42514	6.80569	1.42671	1.38457	0.661255	2.05201	8.13286
KIF3C	93.5398	19.8819	93.9103	77.3723	75.1628	8.72542	4.8196	11.3852	4.64362	3.53593	12.4637	5.51306	10.8839	17.8602	12.6879	8.11525	15.0499	12.2326	18.6046	11.9567	5.43313	8.84735	12.3	12.0114	11.9661	10.3379	10.723	11.1328	8.01426	11.3894	13.465	11.6486	11.975	11.0059	17.4636	5.23706	20.1034	7.63664	17.7777	6.27451	5.55779	4.84548	15.3381	8.22395	11.4067	16.3111	12.052	15.4416	18.6351
GOT1	126.84	47.5832	115.595	111.148	118.115	28.9718	10.9431	10.4514	12.6806	18.7249	19.2269	15.1073	10.569	17.1629	9.24523	9.41601	14.015	13.4512	18.8637	13.1854	15.9838	10.0311	13.7818	17.0687	24.2442	21.5138	8.85062	9.82264	17.3865	13.5001	8.82196	11.0611	7.12377	15.0294	14.2705	14.7739	22.299	34.8779	15.5469	15.359	12.4189	10.4793	35.8895	12.0918	21.8678	16.4758	9.02032	15.4559	16.6622
CDC42P4	0.0304595	0.0760185	0.0332061	0	0	0.0386426	0	0.10022	0.0811242	0.43138	0.102792	0	0.0785922	0.127791	0.156253	0	0.129767	0.159543	0.0965727	0.206285	0.0857018	0.141371	0.125273	0.0768314	0	0.0390999	0.180314	0.0978213	0	0.0381648	0.293179	0.162871	0.0903429	0.0551656	0.112806	0.0663633	0.04396	0	0.0639324	0.0348778	0.114578	0	0.0385247	0.0598407	0.0283249	0.110838	0.177825	0.105349	0.0468577
SYP	232.805	61.4196	244.355	200.686	242.837	15.1018	1.86266	9.14968	5.00081	11.0632	6.35498	9.28153	12.2433	16.9898	4.07801	3.43701	16.1773	10.2654	23.6457	7.37141	11.7364	8.97794	12.5099	15.3366	19.6525	19.3075	2.86479	3.50259	15.3274	7.50286	9.54453	11.0106	2.21398	13.799	15.5395	9.2278	16.8809	25.4949	7.02623	13.3368	7.77221	5.15985	71.8267	8.44358	2.22615	18.3437	6.94954	12.4613	24.3068
LRRC17	1.53274	0.992335	0.831978	0.844007	0.934448	17.0206	11.5687	15.5654	6.20018	19.9008	11.3262	2.83406	2.94541	13.2646	8.67696	4.24308	8.09409	0.974143	6.81155	2.39748	2.21041	16.6982	5.47735	6.8265	12.9391	10.9737	3.67622	1.22202	6.29953	2.96508	15.4937	5.73361	1.81654	4.5298	11.2975	32.6818	4.60003	3.33619	8.65523	8.34209	12.4801	3.10948	5.09385	5.22868	7.84226	18.607	3.53437	3.03878	7.21183
FTH1P4	0.155052	0.425662	0.338066	0.25737	0.239616	1.06222	12.0257	1.66652	9.16762	2.1959	3.83719	3.5365	2.4004	2.30931	2.90318	6.30683	1.32113	4.38555	3.80167	7.47656	1.91953	1.11544	2.16815	2.54217	2.65886	2.50784	3.39614	4.28238	4.46918	2.48671	1.85722	2.81888	5.19668	2.24653	2.02895	3.04035	3.22235	4.85984	2.08283	2.20153	2.44964	3.60079	5.09878	3.10706	3.54696	3.12198	3.22253	1.93058	3.8164
PCDHB17P	0.195761	0.14657	0.115853	0.0729466	0.135829	0.106437	0.243709	0.14109	0.223449	1.10018	0.0629178	0.143519	0.0865898	4.42331	2.15909	4.07496	6.6184	3.2226	0.2128	0.227277	2.455	0.343964	0.966145	0.261004	0.269756	2.18983	0.110368	1.28732	0.403043	2.12345	6.06548	2.2012	4.85239	3.6974	5.78617	3.55834	0.121083	0.438273	0.152616	0.0896631	1.94967	0.131647	0.367857	3.3954	1.02464	2.68658	7.06622	0.167656	0.146274
RPS3AP4	0	0	0	0.0266128	0	0.0284762	0.195605	0.147706	0.717376	0.529814	0.0757484	0.0959924	0.115831	0.0941706	0.0863583	0.462281	0.14344	0.235138	0.0237218	0.182417	0.221041	0.052089	0.123087	0.169854	0	0.230505	0.132876	0	0.255386	0.0562481	0.0720157	0.0240044	0	0.121956	0.0554187	0.391231	0.0971837	0.293138	0.0471125	0.0514037	0.140723	0.246545	0.0851679	0.132292	0.0417459	0.054452	0.131041	0.155266	0.10359
STXBP5-AS1	1.41788	0.352441	1.20984	1.02828	1.13685	0.123057	0.410215	0.0500626	0.281134	0.197529	1.28369	0.0854046	0.121458	0.128668	0.215865	0.168924	0.0972332	0.134487	0.198993	0.243445	0.0561888	0.25489	0.168177	0.212287	0.252254	0.307621	0.180144	0.21989	0.292137	0.0679169	0.125094	0.247128	0.122694	0.103338	0.0845248	0.121206	0.135873	0.0869352	0.116766	0.0816679	0.157396	0.071625	0.198456	0.431568	0.212236	0.304518	0.0999325	0.217078	0.0702203
FHDC1	0.208084	0.136321	0.292066	0.403992	0.212467	0.544472	0.600672	3.46889	0.214752	0.397022	1.06796	1.30147	1.06374	1.33678	1.25424	0.991032	2.27719	2.5068	2.93032	0.86668	1.33926	0.781674	3.28413	1.7452	1.81201	0.974953	0.554316	0.409312	0.572156	0.694173	3.28245	0.856744	0.547744	0.989265	2.00043	1.88994	1.76433	0.260429	0.158323	3.69612	0.626189	0.420383	0.14146	0.546772	0.505522	0.378596	1.85866	1.30744	1.62055
OLFM3	13.7174	1.14562	13.4448	6.37678	10.5183	0.383383	0.0333354	0.0125861	0.0713162	0.493595	0.133395	0.0381714	0.162856	0.381157	0.0981155	0.059087	0.301491	0.100181	0.840884	0.207252	0.0322887	0.0621396	0.36709	0.274994	0.835332	1.26688	0.0566121	0.167894	0.362694	0.0575153	0.114548	0.200452	0.00567288	0.367184	0.783897	0.112513	0.463742	1.89004	0.104377	0.0394214	0.0959288	0.108043	1.18051	0.157818	0.017786	0.524309	0.00446646	0.3925	1.71243
IFITM4P	0	0	0.089024	0.04841	0.0450706	0.207198	1.06745	0.626929	2.06616	0.257002	0.32151	0.698459	0.210702	0.856504	0.680723	0.315341	0.173949	0	0	1.21669	0.689287	0.142128	0.503776	0.102991	0.437604	0.366887	0.483414	0.305963	0.46456	0.204636	0.262	0.17466	0.48441	0.517637	0.0504046	0.533751	0.294636	0.533232	0.257099	0	0.153589	0	0.103283	0.401075	0.949221	2.47627	0.286045	0.188291	0.314058
RPS19P3	0.311088	0.533767	0.381532	0.0461048	0.300471	4.19329	4.40534	2.77214	4.45337	3.05955	1.8372	3.71403	1.00334	2.81423	1.79531	4.00434	5.50838	1.62944	3.00003	2.42285	5.96288	2.79745	2.13238	3.08972	2.55269	2.59566	2.68563	1.87325	5.0143	2.48486	2.2873	2.6199	2.59505	1.76067	3.69634	5.63403	1.29079	3.21632	1.91804	2.0037	3.46184	4.02714	1.81975	2.97942	2.02501	1.41501	4.17716	1.83808	5.44367
GPX1	59.2924	47.1984	81.3792	67.4173	96.0165	224.917	1231.72	130.494	665.158	336.567	160.132	378.991	230.071	114.546	186.991	157.786	263.101	180.591	93.5934	300.461	388.066	143.894	165.787	230.805	238.786	468.967	268.978	390.267	426.241	257.66	119.693	162.969	234.97	83.4757	189.192	497.04	157.441	657.492	205.809	228.952	228.831	420.36	585.325	178.263	226.099	127.782	251.631	213.425	419.188
AP003119.2	0.145328	0.120899	0.0528108	0.459485	0.267368	1.7208	1.26646	0.478166	1.41921	0.686064	1.68929	0.483397	1.18743	1.27024	0.807637	0.748268	1.0319	0.507473	0.563159	0.656151	3.74824	1.18039	1.32822	0.672058	0.194697	1.36805	1.05149	0.466724	0.918621	0.971153	0.673503	0.310836	0.359202	4.03581	0.717625	1.84702	0.699137	1.47618	1.06762	1.88596	0.242965	0.228039	0.551426	0.475852	1.53162	0.411313	0.509063	0.893584	1.19236
BSN	38.5928	6.43229	40.4885	34.7884	26.5249	1.65196	0.262503	1.14064	0.273052	0.464029	0.863172	0.613223	0.995396	2.86455	0.749578	0.329238	2.30771	1.87673	2.90311	1.46166	0.261696	1.72429	1.5475	2.11415	2.63655	1.8506	0.216903	0.713946	1.32682	0.523098	1.77353	1.89892	0.479633	1.65389	2.58345	0.314329	3.05536	1.20548	0.405971	1.10616	1.12118	0.172481	4.11063	1.19811	0.68702	2.0602	1.33776	1.5329	2.02104
C1QL1	12.3153	14.9051	12.4874	19.3745	17.6433	5.12395	43.7942	23.2521	16.3999	10.2315	31.0735	14.309	128.198	175.727	196.116	13.0228	30.3094	469.436	252.707	157.303	66.7863	8.78892	58.7829	199.162	31.2946	140.715	34.6751	29.3867	21.0935	35.6066	92.1532	46.3935	40.3566	18.3231	328.567	5.33751	413.039	76.4395	42.8175	382.05	28.2935	42.9914	119.568	33.8724	32.5711	26.567	33.9697	10.7936	147.244
RPL5P32	0	0	0	0	0.0215354	0.0742519	0.680057	0.106984	0.519601	0.153499	0.0877842	0.22249	0.100677	0.102313	0.10008	0.351575	0.0207789	0	0.185565	0.0792755	0.13723	0.0226371	0.0534915	0.147632	0.0784102	0.050087	0.230983	0.0626546	0.147983	0.146667	0.125188	0.0625915	0.202526	0.0353336	0.144505	0.29754	0.0844691	0.127393	0.163795	0.0446785	0.122312	0.153064	0.0740253	0.19164	0.0362842	0.047328	0.0683383	0.0674762	0.180074
FTLP5	0.0642273	0.0400734	0	0.0761506	0.0354488	0.0407412	4.89746	0.316987	2.05272	0.909613	0.288998	0.457792	0.580022	0.134731	0.288292	1.9015	0.171017	0.504622	0.339391	0.869953	0.67767	0.186311	0.528304	0.324016	0.60232	0.783242	0.411898	0.996959	0.730768	0.442611	0.103034	0.549493	1.14299	0.465291	0.396441	0.76964	0.463473	1.25819	0.134809	0.294176	0.644268	1.0582	0.609253	0.567814	0.447947	0.233715	0.449958	0.185117	0.494024
ST13P4	0.125517	0.0587353	0.136835	0.093011	0.190509	0.577235	0.478544	1.27336	1.08646	0.222202	1.0766	0.536785	0.32386	0.460772	0.342062	0.525088	0.718554	0.657439	1.06121	0.276268	0.927038	0.546148	0.623766	0.613421	0.420388	0.463224	0.665634	0.554261	0.654549	0.884633	0.469826	0.570482	0.674762	0.625142	0.639166	0.871679	0.724595	0.341503	0.955008	0.449136	0.393457	0.615476	0.55563	0.708946	0.817042	0.456739	0.732777	0.32559	0.627541
ATP23	2.78526	1.27803	2.79132	1.93993	2.85392	1.44193	2.55783	13.1367	7.81729	2.51574	3.80754	1.8339	4.88236	1.59823	4.88546	3.50482	1.4766	4.71029	2.37598	6.19181	3.16279	2.69557	21.2493	32.0246	69.7592	56.7406	3.3765	2.32648	3.07902	4.63225	2.13722	2.48442	2.61169	3.05379	57.8511	4.93904	1.1176	7.66642	13.5403	5.77788	2.74066	9.62282	3.20681	2.15932	5.59826	4.92368	1.38543	4.39185	4.43844
SF3A3P2	0.0341381	0	0.0248109	0.0134918	0.0125612	0.216547	0.148748	0.174725	0.424301	0.0895328	0.166408	0.0973301	0.102764	0.131289	0.145936	0.351542	0.096959	0.417225	0.0721572	0.0770661	0.144078	0.0792222	0.140402	0.100462	0.0914699	0.0876439	0.101045	0.0609084	0.302103	0.185354	0.121699	0.0973554	0.135005	0.412186	0.112382	0.23553	0.114961	0.0990743	0.203018	0.18242	0.114147	0.142846	0.0431773	0.0894236	0.179892	0.15183	0.106294	0.0262383	0.140044
ACKR4	0.0528117	0.0282436	0.0246745	0.0268353	0.0416402	0.0861426	0.0986203	0.0661958	1.24581	0.118721	0.0763816	0.15057	0.223865	0.134523	0.183836	0.0388454	0.0241064	0.237103	0.0877071	0.408759	0.042455	0.0437703	0.113772	0.0761216	0.373975	0.058108	0.0297747	0.0726882	0	0.113436	0.0403432	0.19364	0.111885	0.13664	0.0372546	0.115063	0.293988	0.755392	0.213778	0.328278	0.406777	0.0591918	0.639327	0.177864	0.0420948	0.219629	0.0528547	0.121772	0.058031
XG	0.0185458	0.0231426	0.0404363	0.0293183	0.0341198	0.031371	0.296299	0.0745806	0.724444	0.311293	0.097357	0.0528754	0.319015	0.0713238	0.340909	0.111404	0.0197527	0	0.0261333	0.209334	0.00869685	0.0358651	0.0169499	0.0467802	0.356125	0.119033	0.115887	0.172063	0.0468914	0.0232373	0.165285	0.152056	0.0458391	0.0223924	0.0610524	0.0740786	0.0446097	0.982269	0.110291	0.042472	0.341062	0.271608	0.117282	0.0728702	0.0172461	0.262445	0.0866177	0.0427625	0.0190201
AL357084.1	0	0	0	0	0	0.0958405	1.31668	0.289989	0.905411	0.237755	0.0424903	0.323076	0	0.118854	0.193767	1.36139	0.281614	0	0.239517	0.255812	0.106278	0	0.155349	0.190555	0.25302	0.387898	0.14907	0.121307	1.00279	0.378621	0.121189	0.040395	0.16805	0.342051	0.373038	0.658371	0.163543	0.411082	0.237845	0.389264	0.189449	0.17781	0.23887	0.742078	0.175627	0.366532	0.220519	0.17419	0.348646
RNU4-29P	0	0	0	0	0	0.250067	0	0	0	0.155087	0.110866	0	0.254295	0.413484	0	0.253723	0.104969	0	0	0	0	0.571781	0	0.124299	0	0	0	0	0	0	0.210805	0.737789	0.292316	0	0	0.214727	0.142238	0	0.413723	0	0.247154	0.309294	0	0.193623	0.366596	0	0.460302	0.227248	0
AC022400.1	6.2429	0.961762	3.99108	5.61991	4.76432	1.07557	0.671652	0.507179	0.410543	1.15218	1.34384	1.04377	0.696026	1.33384	0.790745	0.69446	0.738795	0.403697	1.87344	0.626366	0.379495	1.69915	0.581134	1.45807	1.1358	0.939891	0.646362	0.288774	0.876922	0.579418	1.07155	0.618179	0.0571495	0.55835	0.570875	0.209902	1.16795	1.09043	0.93018	0.794274	2.31936	0.362813	1.12103	1.43846	0.680879	1.16858	0.404962	0.755279	0.592829
AC110588.1	0	0	0	0	0	0.158801	0.545411	0	0	0.787889	0.281614	0	0	0.393867	0.16053	0.644494	0.133319	0	0.132288	0.169545	0	0	1.02961	0	0.33539	0.482042	0.247	0	0	0.156838	0.133869	0	0	0.453404	0	0.681798	0.180653	0.272454	0.262729	0.859981	0.156952	0.196413	0	0	0.116401	0.455489	0.146154	0.144311	0
AL355601.1	0	0	0	0	0	0	0	0.0880931	0.213925	0.0631972	0.316239	0	3.0569	0.0421231	0.154515	0	0.0427744	0	0	0.0543975	0.0564989	0	0	0.0506511	0.161411	0.15466	0.158496	0.0429925	0	0.553523	0.0429508	0	0	0	0	0	0.115922	0.262245	0.674359	0.0919729	0.050357	0.315089	0.10159	0.0789001	0.149386	0.389708	0.0468926	0	0.0617819
IGLV1-44	0	0	0	0.0435379	0.0810692	0	4.32008	0.0402738	9.09547	4.10267	0	0	0.663237	0	1.45989	0.0945349	0.0391106	0.19234	0.0776166	10.4948	0	0.383473	0.151025	0	0.147586	4.61948	1.99266	1.88688	0.139268	0.276061	0.157088	0.157082	0.0544572	0	0.0906635	0.0400027	1.74889	21.1808	0.539523	0	0.828788	0.288101	0.325109	0.072142	0.170738	0.0890821	0.643141	0.0423352	0
SLC4A10	31.5627	4.18064	30.4172	19.9229	20.3011	3.81519	0.247421	0.792173	1.11309	1.98725	4.39468	1.11707	0.820481	1.31743	0.696189	1.43261	0.849125	0.535367	2.87335	0.612228	0.26202	0.527099	1.46351	1.54404	1.54277	1.97682	0.92777	1.21575	1.74871	0.480962	0.682588	0.548965	1.58652	0.933803	1.12719	2.07102	1.5997	3.50521	1.36348	0.223671	0.811681	2.34871	2.46771	0.999554	2.0826	3.07189	0.299684	1.34335	1.89733
HOXA5	0	0	0.021904	0.0119111	0	0.790193	1.13811	8.42884	24.5087	2.41871	5.40182	4.39657	0.116645	9.04071	7.83333	3.5432	0.438694	4.9463	0.530857	6.70842	4.21164	1.51537	0.633532	6.32243	5.07397	16.2359	6.89863	0.914126	4.72452	2.73147	3.51329	4.43711	5.09525	1.29182	12.2778	0.930233	0.695943	4.30771	16.0043	1.7255	12.1305	10.9085	9.41526	0.493414	1.22381	10.6989	0.598231	5.39723	1.46818
ANGPT2	0.255649	0.448515	0.212475	1.31447	0.15926	6.5444	5.92256	13.0753	6.74139	2.31415	11.6598	12.8779	7.01754	12.6742	8.79379	10.1589	4.8553	6.05889	2.20157	3.78844	4.48316	9.72138	14.7789	7.84994	2.0041	3.76256	20.5157	9.01768	18.0379	5.27734	11.2909	8.31563	23.0592	3.56195	9.57725	12.4827	8.97191	1.56467	1.30428	3.63451	7.3505	4.04721	0.726715	9.43329	5.54317	10.3159	12.9064	14.3165	4.57918
RPL21P123	0	0.0525779	0.0459338	0.0499563	0.0465102	0.106908	0.917952	0.184844	0.448874	0.132605	0.0947941	0	0.108716	0.309351	0.324215	0.325414	0.0897526	0.882778	0.133588	0.342424	0.118551	0.0977788	0.173289	0.212561	0.395134	0.216346	0.249427	0.180421	0.479398	0.105586	0.0450614	0.135179	0.124971	0.0763101	0.208058	0.1836	0	0.183421	0.0884372	0.144739	0.211326	0.132229	0.159873	0.0827772	0.0391816	0.204429	0.0491969	0.0485763	0.129636
ELSPBP1	0	0	0	0	0	0	0	0	0.812686	0.0960327	0	0.108746	0.059049	0.0960137	0.469593	0.0392774	0	0	0.693336	0.0619957	0.0214636	0.0885142	0.0418319	0.153936	0.817587	0.528788	0.0301058	0	0.0578633	0.114698	0.212117	0.0978967	0.181007	0	0.131841	0	0.0220191	2.72309	0.240173	0.524099	0	0.861842	0	0	0.0425629	0.518166	0	0	0.187764
RPL35P2	0.472416	0.294755	0.309009	0.504104	0.834365	2.57713	6.17531	3.3678	9.18491	7.43394	2.12568	4.04067	2.74261	2.03154	1.75698	2.67563	4.52843	4.70146	3.19532	6.91073	5.1839	2.08298	1.94294	3.21739	3.16449	7.45903	4.52118	2.52862	5.1959	6.21518	1.91989	2.98077	3.7832	2.56679	5.19043	6.48441	2.18177	3.18764	2.62765	2.27196	5.15348	3.63229	5.67629	2.13465	3.07516	4.87068	4.41281	3.59464	5.23257
ADTRP	0.685948	0.360951	0.79285	0.837785	0.693327	0.0262118	1.87253	0.0226601	0.253127	0.0780295	0.0511317	0.0235625	0.357178	0.0216706	0.158983	0.191485	0.0132034	0.064932	0.0174684	0.610078	0.0232531	0.0431523	0.0396546	0.036481	0.0885752	0.185654	0.0733857	0.44678	0.0313438	0.0569529	0.0265157	0.0486103	0.324788	0.0374195	0.0918214	0.0630212	0.0775284	0.116926	0.0303563	0.0141949	0.0777196	0.201004	0.162017	0.0649452	0.0268984	0.0551343	0.101322	0.123864	0.0190705
FCN3	0.11079	0.0691253	0.0517629	0.14074	0.0960896	0.100396	2.44818	0.121509	1.30675	0.4483	2.05636	0.157935	0.183769	0.36521	0.751016	0.162982	0.0505712	0.331602	0.125451	1.27554	0.300589	0.0826405	0.412257	0.419187	0.106018	0.832988	0.335735	0.618422	3.24141	0.703996	0.169266	0.143871	0.7863	0.114659	0.459154	0.396557	0.456843	0.53397	0.157795	0.498381	0.287757	0.794717	0.200179	0.450863	0.912514	0.403151	0.14784	0.392309	0.718261
AL139246.1	1.50758	2.16344	0.780672	0.893724	1.95537	0	0.328445	0.041336	0	0.0593081	0.211984	0	0	0.276717	0.0483354	0	0	0.197412	0.477982	0.05105	0	1.53061	0.103339	0.332739	0.201971	0.241904	0	0.201734	0.142941	0	0	0.0806124	0	0.0682598	0.0465273	0	0.217578	0	0	0.12947	0.0472581	0	0.0953381	0.0740447	0.0700963	0.0457158	0.0440069	0.0869035	0.05798
AC100832.1	0	0	0.0488121	0	0.0494247	0.170411	0	0	0	0.140915	0.100734	0.127656	0.462114	0.516586	0.0574219	0.115268	0.0476884	0.938096	0.189279	0.242587	0	0.051953	0.552443	0.564701	0.299924	0.862137	0.0883524	0.0479316	0	0	0.143655	0.0478833	0.0664009	0	0.165822	0	0	0	0.234947	0.205078	0.336853	0.0702575	0.113261	0.0879643	0.124911	0.0543099	0.0522797	0.154861	0.137759
AL132655.2	0	0.108077	0.0314731	0.0342293	0.0637362	0.219755	0.125793	0.221642	0	0.0908593	0.324757	0.57617	0.148981	1.63514	0.555368	0.222969	0.184491	0.302433	0.610218	0.586559	0.324916	1.07194	0.554097	0.691806	0.502802	0.444712	0.199388	0.0618108	0.547461	0.144692	1.17327	1.29672	0	1.30716	0.106919	0.15725	0.29166	0.0628388	0.0605958	0.231403	1.30318	0.0453007	0.547712	0.170153	0.349006	0.455234	0.202254	0.499256	0.266473
AC016734.1	0.262213	0.196323	0.0571714	0.155445	0.173667	1.69655	2.39931	2.76079	3.42198	2.39318	2.06474	2.54179	1.72524	1.65014	1.34511	2.49766	2.37385	2.33484	1.93982	2.41512	3.91018	1.52125	1.47384	1.71966	1.15925	1.78395	2.19902	0.870171	3.48065	2.36551	1.3741	1.65447	1.01104	1.56716	1.90983	3.42776	1.24883	3.2532	2.5592	1.77146	1.47952	2.18067	1.79087	1.54543	2.48713	1.59027	2.02068	1.6022	2.4606
AC107890.1	0.032915	0	0	0.0390254	0	0.208789	0	0.252697	0.262992	0.155385	0.111078	0.140764	0	0.103569	0.0844245	0.25421	0.175285	0.862022	0.0695719	0.089166	0.370442	0.0381919	0.180495	0.124538	0.0440963	0.169008	0.162375	0.140943	0.374501	0.28869	0.140806	0.0352002	0.146439	0.0596127	0.2438	0.609562	0.0475038	0.143287	0.103629	0.226137	0	0.464832	0.166521	0.193994	0.153041	0.0399245	0.115296	0.0758946	0.30381
RPS15AP5	0	0	0	0	0	0.168215	1.15548	0.339317	1.29485	0.486846	0.348026	0.693059	0.0570198	0.139071	0.28341	0.568915	0.188295	0.463003	0.32697	0.239461	0.746136	0.256417	0.121183	0.278712	0.177636	0.567351	0.348855	0.283884	1.00575	0.719917	0.047268	0.141799	0.196635	0.800469	0.272808	0.866657	0.127575	0.673412	0.185536	0.607306	0.110837	0.277408	0.335403	0.694646	0.493204	0.16083	0	0.254775	0.951887
NEDD4	0.405295	0.416364	0.427456	0.375488	0.274674	1.97541	1.6592	2.17913	1.50118	1.56032	2.85001	1.22002	1.32786	2.2283	1.45054	2.4168	1.64034	2.52771	1.59778	1.77457	1.43472	3.61125	2.54814	3.46876	0.762692	0.629157	1.59765	1.82024	1.54428	2.22733	2.09064	1.3124	1.63542	2.92931	1.91058	1.44365	3.24842	0.865762	2.13265	2.08515	1.46785	1.64167	0.79872	1.4999	1.37434	1.75378	1.81588	3.2317	0.971485
AC104390.1	0.0329783	0.0823047	0.035952	0	0	0.20919	0.28739	0.36169	0.614828	0.0518946	0.40807	0.56414	0.127637	0.484254	0.211467	0.424498	0.0702486	0.518208	0.383381	0.268012	0.278366	0.114796	0.180842	0.499109	0.353449	0.423331	0.488062	0.141214	0.250148	0.413207	0.282154	0.141072	0.586881	0.238909	0.366403	0.215553	0.285571	0.215344	0.519143	0.18881	0.372157	0.206989	0.250262	0.323945	0.153336	0.160005	0.269542	0.266142	0.558057
CASC6	0	0	0	0	0.0258249	0.0890414	0	0.282247	0	0.0368147	0.0526346	0.233455	1.26766	0.490766	0.240028	0.120458	0.224259	0	0.0741752	0.475329	0.0658255	0	0.256584	0.61963	1.44176	0.240254	0	0.0250448	0	0.0586269	0.0250205	0.0500391	0	0.0423714	0.23105	0.101944	0.0337646	0	0.270077	0.214311	0.146674	0.110131	0.11836	0	0.478625	0.0851324	0.191217	0.0539442	0.179951
NCAPH	0.245878	0.456969	0.153986	0.167471	0.219441	4.83167	1.16253	7.98675	1.92278	3.43283	6.66755	4.00474	2.96287	12.3075	3.60952	4.01344	6.4411	10.4674	0.370431	6.94423	5.46825	3.21111	10.6718	5.25196	2.71934	5.16418	1.25941	0.431223	2.22218	4.10988	5.54452	3.65332	0.868923	5.07846	9.47416	4.13176	3.60898	0.523797	7.23063	8.72189	2.3549	1.54326	0.899866	1.59305	5.72591	5.48889	5.18598	2.02048	5.17477
MDK	3.03773	2.85518	4.36728	3.96274	6.06852	107.303	62.7441	77.6639	46.3801	94.1533	41.8929	107.258	51.8033	77.2538	42.7734	101.986	95.2407	65.8945	3.7881	161.452	113.034	66.236	88.9851	29.6154	48.9823	73.1168	64.5807	41.3469	69.5105	96.6904	32.6211	44.1029	34.7425	33.901	76.553	71.3223	33.9009	42.2725	39.9031	18.9209	101.716	21.1985	49.937	33.0767	86.3719	57.9975	82.9191	91.2452	84.6567
BCO1	0.216554	0.321353	0.185036	0.242876	0.239043	0.720243	0.153013	1.55984	1.83939	2.42222	0.559625	0.884397	0.890988	0.577044	0.645516	1.2506	0.941284	0.735749	1.63297	0.642132	0.247014	0.977921	0.288854	0.797211	3.0972	0.631096	1.18379	1.0338	0.443948	0.528002	1.8027	2.59129	1.97029	0.551204	0.917605	1.10302	1.12344	7.33785	0.651085	0.56295	2.17226	2.01126	1.08077	0.781891	0.446296	1.27076	0.649214	0.492577	0.31513
AL391422.1	0.314655	0.0981615	0.257271	0.186534	0.0434166	0.898175	0.514137	0.776472	1.36181	0.433249	0.752156	0.224276	1.82673	0.618804	1.31149	3.03769	1.29863	2.6782	0.374108	1.11877	0.331996	0.502013	0.862735	0.248028	2.16042	0.201956	2.01792	0.547366	0.745853	2.56264	1.1778	0.883316	0.816609	0.569875	1.45665	0.42847	1.93	0.599275	1.94004	0.225186	0.147952	0.432019	0.54721	1.23634	1.13384	1.7652	1.42366	3.17417	0.36304
CCL18	0	0.030636	0.240881	0	0.0406507	0.0778661	500.745	0.430818	3.33474	2.31798	0.372832	0.17499	0.855175	0	0.409311	0.50563	0.692932	0.450078	0.41514	12.6198	0.120884	0.0284867	0.0841429	0.0464453	0.0164454	24.3611	1.30802	106.927	0.186223	0.107664	0.196922	0.183787	0.74638	0.200089	0.287923	0.267448	0.354323	0.507658	0.244769	0.21084	0.169311	0.134832	0.621028	0.771718	1.23283	0.297791	0.372657	0.0849128	0.018884
PARM1	35.7997	3.00116	30.5568	22.7192	25.9126	2.60171	1.49918	0.754706	4.04651	1.74219	10.5267	0.597311	7.22074	1.28271	4.13289	0.771754	2.23138	4.03256	4.39226	3.04997	0.512789	2.22143	1.27495	1.68848	6.31174	2.41385	3.7274	3.78534	2.04133	13.8593	1.42086	1.49731	3.88495	4.26325	0.988267	1.99282	3.24978	6.02084	0.550562	0.655321	2.52869	0.865951	3.24867	1.11096	0.48468	5.99145	1.03417	23.3052	1.00094
LINC02154	0	0	0.0240142	0.0783515	0	0.0419187	0.143972	0.0724774	0.234671	1.28253	6.95056	0.0157007	0.142092	0.0115521	0.25425	0.45367	0.0117307	0.461516	0.1164	0.417711	0.0929674	0.0766782	0.150993	0.430616	0.0147554	0.141382	0.0978005	0.495201	0.0417716	3.24302	0.12957	0.671382	1.47003	0.339107	0.258336	0.095986	0.413286	0.335624	0.0115587	0.832364	0.082861	0.656729	0.0139303	1.68776	1.43389	0.841646	0.180041	0.952338	0.0508302
S100A4	2.34226	0.751582	2.0063	2.28118	3.2873	15.3033	121.449	16.7528	114.828	60.3942	16.7122	18.3882	65.184	6.68574	26.2624	29.4606	15.5027	16.9129	2.22786	57.4688	16.3815	20.8298	15.8259	8.75672	17.6621	37.0467	15.2358	51.9033	31.0281	53.8741	16.2465	20.9158	40.9882	14.2716	7.66248	129.767	17.5299	82.8096	8.779	8.86983	29.1594	66.4183	78.1454	16.6973	49.3188	7.95499	27.6222	40.274	6.2542
ARHGAP11A	0.354819	0.399487	0.378089	0.192947	0.176693	2.56548	1.05782	5.67045	1.37132	1.67923	5.47087	1.95857	1.23904	10.6862	1.73464	3.79116	3.73078	7.97896	0.690767	5.3444	2.49207	2.30307	7.98402	3.33101	1.32241	1.72941	1.32397	0.902468	1.72006	3.41622	4.01722	2.79312	0.909964	5.7304	5.01255	2.11283	2.07914	0.458739	4.60843	2.19945	1.94352	1.42329	0.708584	1.13734	3.68655	3.40098	3.32057	2.58358	4.31747
POLR2F	1.49034	3.98994	1.44952	1.72659	2.02952	0.139024	0.106108	0.117516	0.116744	0.118793	0.287633	0.100672	0.106817	1.55039	0.546535	0.112846	0.103747	1.36481	1.08864	0.240787	0.150739	0.254305	0.444017	1.62164	1.5464	1.75681	0.105717	0.255476	0.203187	0.0762807	0.179702	0.369807	0.126399	0.127902	0.691435	0.106113	0.685337	0.148415	0.189119	1.3022	0.192368	0.0573174	0.717642	0.464067	0.0905817	0.0767989	0.0597111	0.0870331	0.734259
FCGR3B	0.0781262	0.0208909	0.0547528	0.152177	0.2464	0.927435	9.53165	0.201972	6.76251	0.772762	0.86001	0.103416	0.619147	0.105356	1.76055	2.09749	0.528979	0.0584593	0.141544	2.59262	0.0314026	0.498583	0.749734	2.52667	0.127094	0.587402	0.715761	13.4174	4.71967	0.244724	0.608747	1.03245	0.496548	0.353738	1.10224	1.69001	0.434908	0.668058	0.521227	0.121409	0.363855	0.726787	0.465832	0.274083	1.06382	0.866413	1.79185	0.58546	0.360559
AC008747.1	0.0775959	0	0.0422965	0.0460005	0.0856545	0.295328	0.845264	0.127655	0.826659	0.366315	0.305507	0.221231	0.450482	0.122081	0.199028	0.0998819	0.123968	0	0.24602	0.420411	0.382071	0.360144	0.159567	0.146797	0	0.298822	0.306235	0	0.147146	0.583351	0.12448	0.0829833	0	0.351337	0.0957916	0.253592	0.0559943	0.844485	0.28502	0.444259	0.437832	0.365275	0.147213	0.30489	0.72158	0.423543	0.181205	0.0447297	0.417797
PGDP1	0.0119005	0	0	0.0282196	0	0.181172	0.362976	0.234935	0.316953	0.224721	0.3079	0.203576	0.168883	0.274604	0.167882	0.245095	0.27885	0.124667	0.238963	0.225668	0.150677	0.138085	0.146833	0.225136	0.127546	0.152764	0.152639	0.293011	0.631879	0.253487	0.229091	0.229082	0.229431	0.0862129	0.249749	0.337067	0.154577	0.310836	0.187338	0.218029	0.0596875	0.112041	0.105361	0.210418	0.309864	0.173219	0.180639	0.10976	0.27461
MIR600HG	7.65158	1.89532	6.66698	5.64368	7.11444	0.60352	0.374605	0.631749	0.358728	0.347236	0.815595	0.400353	1.90772	3.2252	2.18309	1.02549	0.63792	2.19153	2.62887	1.38575	0.104821	1.10397	1.57542	1.85776	1.30151	0.985887	0.62204	0.512325	0.728204	0.506289	1.68566	1.92465	0.475991	0.726629	1.32666	0.23414	2.14655	0.205843	1.32631	0.439715	1.23251	0.202354	1.60206	1.1429	0.858106	1.51903	0.772952	0.85571	0.9258
AC025035.1	0	0	0.0209117	0	0.0211741	0.146012	0.0835809	0.0420758	0.204353	0.271663	0.366823	0.109378	0.0742406	0.0402384	0.0492004	0.0987647	0.0204303	0	0.202723	0.181873	0.323826	0.0222572	0	0.19354	0.102793	0.0246233	0.0378512	0.0410689	0	0	0.123087	0.0410276	0.113788	0	0.0947201	0.0626888	0.0830519	2.1711	0.563663	0.505182	0.0721558	0	0	0.0753699	0.891886	0	0.0671917	0	0.0590176
AC116347.1	0.142906	0.297211	0.129827	0.141196	0.0788736	2.41731	3.52851	1.82854	1.96647	2.88592	1.01811	4.71945	0.553092	0.999254	0.855267	1.28764	1.0147	1.24754	0.981688	0.645215	1.50782	1.51998	0.62039	1.20156	2.64841	1.37583	1.36296	0.994381	1.80662	1.16387	0.560389	1.12074	1.51883	0.819591	0.588054	2.69841	0.859356	1.45158	0.874852	0.872721	0.59729	2.39188	0.93385	0.982634	1.06313	1.04003	1.22364	1.01599	0.806083
TNNI2	0.142642	0.0593324	0.103669	0.0375826	0.297416	0.281498	3.38387	0.330268	1.85731	0.573623	0.677488	0.338901	0.592964	0.349092	0.731731	0.816041	0.472653	0.996185	0.11725	0.880164	0.13378	0.38619	0.478013	0.75958	0.467128	0.793453	0.469117	1.37429	1.20219	0.417026	0.169501	0.830524	0.658117	0.0861133	0.489139	1.48483	0.365981	1.62138	1.31401	0.308517	0.953897	0.994773	1.4032	0.373645	0.471628	0.384486	0.462642	0.365444	0.633921
FBXL2	8.29689	2.04108	7.10821	4.93183	6.96771	0.562063	0.750723	0.132519	2.47316	2.65134	2.12438	0.175435	1.47511	0.704067	1.86237	0.27074	0.347943	2.14477	1.51344	2.97317	0.491063	1.71615	0.932528	1.92745	0.611526	1.53668	2.28051	1.34378	1.22202	0.0841079	2.31882	1.77794	0.809668	2.19644	0.5635	0.143815	2.7546	3.85243	1.40895	1.37843	0.96514	0.969047	2.66024	0.78687	1.6438	0.455965	0.156757	1.33885	0.547307
RPL5P4	0.0193552	0.0483052	0.042201	0.114742	0.106827	2.03807	4.80713	2.71717	4.43326	3.62442	1.93777	1.82104	1.17361	2.00979	1.81203	3.18901	1.93778	3.5483	3.51833	2.8838	1.7699	1.39241	1.539	3.05136	1.52988	3.03117	2.21519	1.07743	3.52352	3.3467	1.49038	1.24194	1.34908	2.80435	2.74779	6.85261	1.50843	3.4967	1.88907	1.50707	1.94153	6.56011	2.88866	2.81386	1.65589	2.11293	1.51416	1.78515	3.51348
NME2P1	0.082844	0.206756	0.451571	0.29467	0.320067	4.78207	11.1901	6.04215	11.2528	5.80117	3.07531	6.49533	2.29787	3.38877	2.60299	6.2916	4.63234	5.42407	2.40771	7.12542	6.00213	2.93183	2.66896	2.45536	2.77466	5.42355	4.53638	1.99541	6.91229	3.26972	3.67686	4.164	3.25573	3.97605	4.44875	8.39303	2.21191	5.13912	4.08627	3.98416	5.19382	6.88964	4.03402	4.23163	3.46672	2.41167	4.40122	2.33999	4.14193
TMSB4XP2	0.0816605	0.407604	0.623168	0.09682	0.270424	8.90952	38.0723	10.7474	38.7132	17.4761	10.472	9.66202	4.95149	5.39597	6.49305	24.8069	9.13232	4.705	4.83293	9.06988	8.61609	6.72741	7.94846	5.97346	6.01705	13.9417	12.2465	7.51796	18.5824	11.8689	6.026	5.23981	9.32489	7.24691	6.14936	19.3929	9.19266	20.4406	9.51268	3.36621	7.37226	19.0923	8.98561	8.82366	10.2516	5.05159	6.19764	6.2136	11.5573
AL590135.1	0	0	0	0	0	1.67352	7.18474	1.08507	5.26995	2.42175	2.10218	0.940233	0.567274	0.691791	1.2688	4.24498	1.40497	1.72736	1.27794	2.23344	2.47436	0.765307	1.65772	1.24777	1.32543	2.6811	1.08458	0.235356	2.91839	0.964149	0.822948	1.05804	0.978136	2.38909	0.678524	4.43081	0.15865	1.43562	1.49975	1.51048	1.24053	4.82975	1.66842	1.72771	1.02224	0.800026	0.513414	1.01387	3.88949
FBXO5	0.599511	0.848599	0.775505	0.742632	0.572878	5.85187	1.91043	4.06286	2.60954	6.06164	5.3297	2.07278	4.36356	8.24952	3.97622	5.20606	7.20484	7.33485	1.05913	8.16879	6.04857	4.48003	9.64792	5.45638	2.82307	5.04817	1.80098	1.25483	3.46147	5.27499	4.99051	3.72241	2.80656	6.32832	6.98116	4.90792	2.98311	0.847217	3.51675	7.69465	3.07418	3.21527	1.78812	1.95128	4.12714	7.33152	5.66269	3.81691	2.80809
C11orf87	22.1383	2.4876	21.4275	9.99333	20.2358	0.839321	0.177787	0.0926969	0.0931467	0.88055	0.304899	0.128795	3.68478	1.14327	1.43154	0.225091	0.332141	0.228984	0.699189	0.678989	0.0574016	0.0608708	0.871019	0.433737	1.85465	1.10366	0.816644	0.131038	1.10534	0.0109552	0.654555	0.841539	0.293906	0.93428	0.759153	0.352417	4.51749	1.92848	0.339508	0.113466	0.0877054	0.109756	1.80991	0.131692	1.03801	0.487847	0.0204179	0.594729	0.878765
SMIM32	1.25503	1.06547	2.25417	2.64672	2.91837	0.0522035	0	0.0338474	0	0.210443	0.150437	0.0439941	0.0530863	0.0215796	0.0527717	0	0.0986094	0.323297	0.119591	0.125405	0.173666	0.059682	0.0141029	0.142716	0.110254	0.22449	0.131946	0.022025	0	0.0128895	0.132022	0.418053	0.106791	0.167681	0.0126994	0.0336196	0.222701	0.156739	0	0.247367	0.709438	0.0484258	0.0390331	0.323362	0.0669636	0.311948	0.24023	0.260919	0.0791268
PPIAP33	0	0	0.0336848	0.0366346	0.0341075	0.274397	0.134633	0.16944	0.329174	0.388976	0.139031	0.396423	0.0398625	0.162041	0.198131	0.477274	0.164546	0.323685	0.0653098	0.251111	0.260811	0.0358522	0	0.0779389	0.206975	0.198317	0.0914567	0.0661542	0.820304	0.116145	0.0991351	0.363482	0.137468	0.111921	0.152576	0.437579	0.222968	0.134509	0.0972809	0.141522	0.193716	0.145452	0.27356	0.121407	0.201132	0.112436	0.252544	0.106868	0.285199
MAPT-IT1	1.19404	0.390238	1.15914	2.93927	1.28666	0.0432808	0	0.0249441	0	0.0715788	0.0383765	0.0810546	0.16138	0.202766	0.0510438	0.0585515	0.0605592	0.238256	0.150228	0.177135	0.015998	0.0263899	0.740519	0.172106	0.137114	0.109482	0.0112198	0.0669548	0.0431289	0	0.115537	0.158098	0.0084322	0.0308934	0.280768	0.0433584	0.262594	0.40841	0.00596716	0.57294	0.0855534	0.0178439	0.222935	0.0781937	0.41242	0.0827613	0.00663897	0.0458865	0.253662
IQUB	0.0960304	0.0472068	0.0793104	0.0517535	0.0610323	0.125521	0.076078	0.156387	0.480523	0.270172	0.579405	0.0912631	0.942312	0.0366263	0.257507	0.28468	0.154969	0.0914536	0.0830364	0.484814	0.184223	0.202593	0.19947	0.0734025	0.187131	0.119536	0.157911	0.0872253	0.110366	0.226061	0.242749	0.217844	0.172622	0.115948	0.100587	0.317008	0.197391	0.323034	0.983374	0.129953	0.496238	0.410958	0.217152	0.308718	0.692756	0.885961	0.101933	0.258329	0.0537198
AC104248.1	0	0	0	0	0.0212693	0.0733341	0.167913	0.0845298	0.307907	0.545768	0.0866993	0.192272	0.0248581	0.0202096	0.0494216	0	0	0	0.0814538	0.208789	0.325282	0.0894291	0.105661	0.0972047	0.154882	0.0989359	0.171096	0.12376	0.146154	0.0241424	0.0618202	0.494544	0.142874	0.174484	0.0713593	0.356833	0	0.712973	0.323541	0.110316	0.483201	0.453516	0.584883	0.416397	0.0179179	0.397316	0.0449958	0.133285	0.0592829
ATP6V0D2	0	0	0.012422	0.0337744	0	0.00722784	0.223419	0.0187454	0.257953	0.197234	0.102541	0.0974594	0.124951	0.0119512	0.31418	0.513347	0.018204	0.41778	0.0240844	0.300957	0.176329	0.337142	0.124968	0.222747	0.0305305	0.0658203	0.185496	0.23176	0.0432149	0.471138	0.0670232	0.15232	0.735064	0.165093	0.0984648	0.111715	1.5047	0.0248015	0.00597906	0.163092	0.0500056	0.0357589	0.0504405	0.425326	0.100662	0.386989	0.339262	0.68967	0
AC090686.1	0	0.0571408	0	0.0271458	0.101093	0.203325	1.79571	0.40177	0.975657	0.864679	0.489347	0.554851	0.383989	0.168099	0.381714	0.943078	0.390166	0.719541	0.459741	0.37214	0.515355	0.239095	0.219715	0.721897	0.306732	0.793534	0.677683	0.269607	1.042	0.688494	0.269346	0.391761	0.645126	0.870791	0.452228	0.997665	0.49565	0.647852	0.432504	0.419465	0.229665	1.54482	0.694988	0.404824	0.340655	0.277713	0.454464	0.211167	0.986201
PLAC8	0.0623104	0.0444313	0.121302	0.116094	0.112998	0.909079	1.29933	0.698035	0.284493	2.0871	1.01635	0.831153	0.522517	0.144714	0.131282	1.8562	2.75889	0.256436	0.460966	0.681218	0.45708	0.273707	1.33625	2.00956	1.35353	1.26263	1.89263	1.47225	1.3504	0.256525	0.63783	0.442657	1.30689	0.233763	0.401091	2.86546	0.745117	0.329378	0.322292	0.132505	0.435294	4.71407	0.472855	0.585843	0.17797	0.626234	1.31998	1.67277	0.527207
NNMT	0.657984	0.205268	1.03755	1.38613	0.888442	11.2692	133.981	20.9921	112.312	99.2416	42.0375	159.088	59.6332	12.0958	57.3133	18.9054	12.5143	17.4168	4.15368	184.501	127.832	31.5478	16.4462	2.07463	2.19589	23.25	44.6085	46.9479	24.9325	123.724	25.2324	45.7698	53.6597	3.2984	20.0966	18.8605	4.90919	468.528	31.5055	10.0031	62.1648	334.758	6.78398	5.82858	2.23989	26.2307	58.5809	11.223	2.11481
RPS27AP6	0.191392	0.143298	0.04173	0.0453844	0.0422537	0.24281	1.00073	0.125946	0.203897	0.240939	0.129178	0.163701	1.03705	0.682526	0.343634	0.591265	0.0815386	0.200497	0.364088	0.311086	0.376954	0.755058	0.31486	0.193107	0.153845	0.196547	0.490967	0.122932	0.145175	1.58273	0.368437	0.122808	0.681202	0.277305	0.33078	0.792286	0.276222	1.33308	0.160687	0.569801	0.239982	0.78083	0.435725	0.526411	0.106787	0.0928602	0.0446945	1.10327	0.29443
B4GALT6	13.2154	1.70193	12.7053	6.3725	8.84763	0.664237	0.718203	2.04171	1.42029	2.74124	0.43991	1.94887	1.85546	3.80342	2.13874	1.74727	1.42854	5.41712	2.66763	2.11002	2.37795	2.92882	0.363321	2.24596	1.06514	2.83359	1.15114	2.04129	2.02249	0.59528	2.53013	1.72471	0.786048	1.8087	2.66519	0.605575	3.51232	4.36856	2.5676	1.65054	1.56425	2.12997	1.06281	0.60955	0.0540981	0.344979	0.758509	2.09033	1.22806
AC010857.1	2.16524	0.252179	2.26607	1.1638	2.42198	0.9889	0	0	0	0.136289	0.129903	0	0.0372453	0.302804	0	0	0.307486	0	0.305109	0.117312	0.0406146	0	0.0791567	0.0364109	0.27074	0.0741186	0	0	0	0	0.123502	0.123497	0	0.313719	0.0356396	0.22015	0.124997	0.125678	0.121192	0	0	0.0453007	0.401656	0.113435	0.0268467	0.0700359	0.202254	0.299554	0.0444123
GSC	0.013567	0	0	0.0160856	0.029952	0.154907	1.00495	1.45821	2.49322	3.69339	0.0915693	5.95679	0.997667	1.18108	3.58424	1.57172	1.15599	1.49231	1.4625	2.11328	5.49685	2.92803	2.54811	3.83282	0.563449	1.61964	1.28502	0.653561	1.8009	1.7339	3.87403	2.78572	1.73031	0.786284	2.42851	1.0789	1.64474	2.68725	1.95062	0.21749	2.63677	2.38431	2.26503	1.14611	0.214476	0.246843	2.13855	5.08341	0.772225
GABRA5	42.1204	12.9766	41.2965	46.0583	39.0077	0.581342	0.107927	0.0407489	0.197909	0.474222	0.032507	0.0470796	0.0266294	1.09547	0.0952977	0.0425111	1.06404	1.44875	1.10818	0.156566	0.0929227	0.273035	0.486716	0.926767	1.29417	3.37034	0.166995	1.45395	0.641929	0.0206902	0.644593	0.794674	0.636706	0.70281	1.28936	0.220362	0.941361	4.16034	0.121308	0.0567248	0.0776448	0.0906886	10.6411	0.559613	0.0115168	0.53579	0.0192808	2.44633	0.647773
EIF5P1	0	0.0173836	0.0303738	0	0	0.229752	0.182099	0.183342	0.148409	0.153449	0.141036	0.15887	0.0718885	0.0438341	0.0893281	0.143454	0.16321	0	0.0883354	0.056607	0.215577	0.0808204	0.0572937	0.193264	0.018663	0.0536472	0.137445	0.0894775	0.105668	0.0698189	0.0595938	0.104285	0.0413185	0.0756902	0.051592	0.21246	0.100526	0.0909656	0.146198	0.11166	0.0174674	0.0874366	0.0704774	0.16421	0.0906811	0.185871	0.130126	0.144545	0.150013
CALM2P4	0.0402552	0.0502329	0	0.0954564	0.0444358	0.35749	1.22782	0.22075	1.39377	0.506764	0.679246	0.516466	0.155801	0.253332	0.154877	1.76177	0.300123	0.421703	0.553064	0.272626	0.566316	0.140127	0.33112	0.25385	0.37751	0.72344	0.397171	0.215467	0.610689	0.353069	0.25831	0.1722	0.656683	0.583253	0.248473	0.701644	0.63907	0.963823	0.718189	0.460944	0.151426	0.884321	0.407313	0.553597	0.598945	0.195311	0.141008	0.371278	0.681196
AL591926.3	0.0425526	0	0	0	0.0469718	0	0.185413	0	0.453329	0.133922	0	0.12132	0.109795	1.11579	0.163716	0.109548	0.0906434	0.222885	0.0449714	0.749282	0	0	0.175009	0.21467	0	0.218494	0	0.0911057	0.322771	0.479853	0.0455087	0.045507	0	0.231203	0.0525309	0.324489	0.061413	0	0.267945	0	0.106712	0.0667708	0.538199	0	0.079141	0.154844	0.0496852	0.0981168	0.0654612
ACTBP1	0.0154076	0.0576798	0.117579	0	0.0510233	0.293205	1.74551	0.709731	0.615538	0.145473	0.658618	0.614995	0.437306	0.549455	0.454474	1.11064	0.55795	0.968438	0.586204	0.563476	0.411838	0.357556	0.274595	0.34978	0.309625	0.356009	0.623269	0.49482	0.876528	0.714295	0.461384	0.510799	0.662636	0.306954	0.893969	0.755308	0.622628	0.301829	0.420414	0.229354	0.444345	0.50771	0.409234	0.726476	0.845344	0.541976	0.575688	0.373029	0.355538
ANKRD24	10.4947	3.42942	10.5927	7.44393	12.9258	0.972543	0.751555	0.5507	0.857516	0.500619	0.685562	0.764964	1.63678	1.7086	1.42554	0.631529	0.526629	1.18452	1.55957	0.69569	0.625504	1.06295	0.809224	1.20854	1.66376	0.733118	1.48244	1.32534	1.19203	0.850057	1.49212	1.8159	1.09138	4.79688	1.0126	0.212951	0.553184	0.533947	0.756242	0.272116	2.10507	0.306737	2.10883	3.51662	1.15841	3.41719	0.648939	1.06498	0.801922
SLC13A5	2.41518	0.340691	2.00438	1.78829	2.32037	0.0993084	0.074871	0.0188456	0.147463	0.174253	0.0665785	0.0190517	0.0394098	0.224281	0.0685585	1.11082	0.0203347	0.170005	0.336965	0.144818	0.0295453	0.0465217	0.0706699	0.144476	0.184162	0.176459	0.346603	0.0817537	0.217229	0.0143532	0.014293	0.0326686	0.00849416	0.0933613	0.0707079	0.0561561	0.27279	0.531926	0.438804	0.037165	0.725366	0.0149792	0.635083	0.0562631	0.00177543	0.0856853	0.0044585	0.226716	0.0881125
CERCAM	16.1779	207.843	8.4049	43.7181	31.6046	11.0772	21.9268	6.99669	9.30947	13.1207	10.3632	8.76734	4.35609	9.51427	14.813	12.6782	8.16619	17.078	4.86663	10.8031	6.38663	10.5615	8.60606	9.47722	10.0671	13.0139	15.9896	12.6526	9.93985	9.277	13.5696	33.8819	9.98121	7.45315	5.47155	6.22195	3.7212	10.6083	8.18611	9.99798	10.4691	5.4892	28.3727	27.7741	4.86119	10.0656	9.5803	17.94	10.467
AL136968.2	0	0.0604498	0	0	0	0.614571	2.95508	0.637555	2.06431	1.2959	0.490439	0.62151	0.312482	0.558905	0.683385	1.49654	0.257975	1.01494	0.870336	0.39369	1.15855	0.281045	0.464878	1.03863	0.519191	0.994948	0.716927	0.363007	3.30704	0.728365	0.621695	0.362642	0.933926	1.22829	0.29901	2.32197	0.349569	0.948972	0.610066	0.665635	0.242965	1.21621	0.551426	0.761363	0.270287	0.235036	0.339375	0.279245	1.04331
PPP1R16B	40.0074	64.6423	41.8535	29.2657	32.0917	2.63789	1.82133	0.390851	1.1561	1.44202	3.88223	1.05042	0.988653	1.49513	3.37449	1.02092	1.34702	10.3156	4.17123	1.35011	0.365645	1.07574	1.9028	15.5587	13.0881	13.6448	0.877698	7.60128	3.04867	0.503596	1.06028	4.3298	0.73513	1.21321	4.99147	2.01991	4.04886	3.76762	0.649578	1.97589	0.755945	0.231246	6.88639	8.75948	1.37293	1.5568	0.663266	2.16549	6.91261
HAVCR2	2.17289	4.66912	3.13058	2.82214	3.74214	9.52245	74.2106	5.06784	35.0591	11.102	16.2073	8.2001	16.145	3.6881	12.222	15.5632	9.52124	8.35889	6.12692	13.6899	2.28313	6.63266	9.77092	18.0973	19.5015	22.6556	11.333	51.3092	19.2858	11.2404	5.1539	16.8978	17.8569	2.99641	8.37003	26.033	9.27129	21.6363	13.862	4.21219	7.55185	25.3948	23.8219	7.72291	10.1282	4.90489	11.9276	14.4849	12.1294
RPL13AP2	0	0.0403759	0.0705473	0.0767253	0.107149	0.574681	0.986885	1.02911	1.37881	1.83296	0.509563	0.461247	0.0834856	0.644802	0.580936	1.08287	1.03385	0.847383	0.923271	1.05182	1.72972	0.262804	0.487934	1.061	1.08369	1.91058	0.510777	0.346374	2.57699	0.527034	0.449849	0.657447	0.911696	1.52361	0.958639	1.86813	0.513668	0.633842	0.475391	0.407544	0.405706	1.16773	0.695698	1.01707	0.60177	0.431712	0.75559	0.373029	1.04528
AC139495.1	0.015982	0.0398867	0	0.0378979	0.0352836	0.202757	0.557102	0.0525849	0	0.176045	0.161804	0.0911316	0.185567	0.100577	0.163971	0.164577	0.017022	0.0837117	0.202686	0.129885	0.0674512	0.12981	0.153371	0.403132	0.0856447	0.246187	0.189221	0.513266	0.0606136	0.0800998	0.068369	0.10255	0.071104	0.0578904	0.138108	0.0522309	0.184525	0.0695736	0.117408	0.0732012	0.0601186	0.300935	0.0606414	0	0.0594479	0.0581566	0.0373218	0.221106	0.196689
AF064860.2	0.0288052	0.0359449	0.0418702	0.0569211	0.0317967	0	0.125512	0.168492	0.997337	0.0604372	0.518448	0.123189	0.433555	0.201417	0.394044	0.741565	0.317024	0.502926	0.0811802	0.897376	0.0135079	0.256245	0.0526529	0.302744	0.501676	0.197207	0.236835	0.31864	0.0728313	0.240613	0.523706	0.44154	0.0711969	0.0173898	0.225212	0.167357	0.207862	0.229893	0.423221	0.12094	0.192631	0.271195	0.327891	0.113181	0.348225	0.710437	0.325124	0.154976	0.0886256
HSPA8P5	0.0580188	0.0827423	0.0542147	0.0196541	0.118939	0.893786	1.69739	0.854491	1.56732	0.939069	0.885745	0.708924	0.160394	0.199947	0.48896	1.85638	1.08581	0.347309	0.586889	0.841991	1.11938	0.740524	0.465873	0.365868	0.499681	0.649013	0.662387	0.346039	0.848737	0.623106	0.700271	0.868658	0.614585	0.585437	0.859485	0.93903	0.729684	0.631425	0.887235	0.41759	0.73788	0.559241	0.765262	0.732752	0.570358	0.412193	0.600016	0.353557	0.777783
AC100861.1	0.0280551	0.0350089	0.00764623	0.049895	0.0154844	0.0978788	0.488974	0.0153848	0.317562	0.0220738	0.118347	0.189969	0.108582	0.0588518	0.0179899	0.541691	0.141934	0.0367373	0.0741246	0.114001	0.286146	0.122074	0.0288461	0.194608	0.122153	0.13505	0.435962	0.615681	0.212805	0.0439402	0.0825112	0.0900089	0.124817	0.0381082	0.0519508	0.229218	0.0708573	0.366393	0.0294429	0.0722806	0.096739	0.0660334	0.257257	0.124013	0.0847893	0.0510446	0.122841	0.153636	0.0647384
PKD2L1	1.91349	0.0767998	2.6228	1.45277	2.42102	0.205846	6.241	0.0429544	0.253325	0.475432	0.169933	0.13559	0.0938362	0.0704205	0.373121	0.158442	0.107264	0.234447	0.0650435	0.0757838	0.0472269	0.142824	0.276131	0.134073	1.40918	1.09887	0.099364	1.34165	0.169758	0.0280414	0.0179511	0.191471	0.141056	0.0810654	0.151954	0.438842	0.113048	0.146139	0.135051	0.064066	0.0771702	0.149248	0.587348	0.142895	0.244537	0.0882247	0.078394	0.109657	0.206571
TNFRSF11B	0.752189	0.287644	1.07131	1.22986	0.709778	9.27334	3.27748	1.74972	14.6535	16.2465	3.75303	0.933914	1.6043	0.407195	2.70726	10.0102	1.27277	3.27263	0.198736	2.97433	2.66255	8.23511	7.61752	0.749752	0.398209	2.08686	2.18451	3.60403	6.25767	5.67761	1.25208	2.3808	3.43645	2.06542	1.40783	3.99133	2.17116	26.0637	5.2011	1.62535	2.2514	24.1768	0.782568	2.96742	1.29177	3.42141	1.57239	4.66464	0.410597
MMP1	0.0261148	0.0325876	0.256227	0.0825673	0.0288269	0.121479	2.88265	0.143207	2.89803	0.369848	0.274181	0.0248183	0.39306	0.0182605	0.569351	1.86004	0.101985	0.364762	0.0275992	19.5844	0.183693	0.222211	0.19094	1.52604	0.011662	0.491666	1.34841	3.53178	0.0330144	0.119977	0.102406	0.121021	3.38226	0.220718	0.891931	0.464661	1.52014	1.00421	0.0274065	1.02667	1.59358	1.39324	0.0330296	0.615661	0.153803	2.05895	5.5089	1.54551	0.0669566
ELAVL2	18.5099	3.91348	16.7855	13.1368	13.7148	0.689921	0.247133	0.431776	0.0888578	1.13926	0.409081	0.161706	5.21671	4.62262	0.389363	0.103069	0.501034	1.34559	1.68189	2.06519	0.0891782	0.0270984	3.58589	2.58779	2.15886	4.84805	0.0658346	0.128576	1.05023	0.00836061	0.160564	0.613689	0.128642	1.31121	7.57834	0.501559	1.65157	2.22215	1.01189	0.542479	0.0794837	0.355989	1.64991	0.301509	0.248201	2.43214	0.0311644	0.538497	8.05797
AC112236.1	0	0.0389785	0	0	0	0.019814	0.0680522	0.0171292	0.0415965	0.22119	0.386514	0.0222642	0.201491	0.524199	0	0	0.0499034	0.163611	0	0.27501	0.0219718	0.0906101	0.0428224	0	0.0209237	0.160388	0.0154094	0.0501579	0	0.078276	0.0167031	0	0	0	0.212085	0.0680556	0.0676215	0.0679895	0.311423	0.107302	0.0195833	0.0735208	0.0592607	0.0306834	0.116189	0.0568324	0	0.0540179	0.840921
MSNP1	0.0099011	0	0.0107939	0.0234783	0.0109294	0.401955	0.862833	1.21621	1.02843	0.264866	1.86	0.635146	0.562034	0.249237	0.558703	1.40192	0.632725	0.311164	0.156959	0.643725	0.390012	0.494003	0.488651	0.224772	0.344878	0.127097	1.10387	0.985725	1.46449	1.58794	0.931824	1.24945	1.21872	0.430368	0.598919	1.00309	0.843082	0.409468	1.14299	0.0566866	0.161392	0.621446	0.150273	0.700261	0.635298	0.996799	0.797688	0.639232	0.472175
FAM124A	2.78135	24.7933	2.59979	4.42321	4.36664	0.977096	2.26327	0.726834	0.940445	0.591887	2.82652	1.03226	1.06294	0.974206	1.01726	1.51507	1.1119	2.2382	3.13145	1.64278	0.140387	0.697706	0.659474	2.05566	2.0225	2.09227	0.615988	3.7499	0.78605	0.868832	1.03166	1.50228	1.73414	0.245611	1.51936	0.936572	1.67655	1.0749	1.46887	1.50011	0.805298	1.95531	3.07445	3.38311	0.875629	0.996272	1.24883	0.905633	3.09784
KNCN	0.836075	0.60923	0.778406	1.06364	1.16542	0.0154845	0	0.0066932	0.0325074	0	0.0205949	0	1.11012	0.0320046	0.0547858	0.0314219	0	0	0.0128993	0.495966	0	0	0.00836638	0.0307872	0.0817587	0.14101	0.0120423	0.0261321	0	0.0611723	0	0.0130529	0.0181007	0.0110527	0.00753379	0.00664814	0.0352305	0.225817	0.409895	0	0.0765211	0	0.347339	0	0.0454005	0.0962309	0	0.063322	0.0281646
SLPI	2.15797	0.430857	9.97487	0.989319	0.508179	2.4457	143.299	2.49299	53.5661	81.5895	2.71881	37.7355	23.3115	5.43219	42.6199	51.8515	8.15167	9.49468	3.10167	174.247	50.3954	4.30678	6.5874	5.37072	9.32845	25.1896	40.056	132.817	85.3356	12.8344	64.3438	17.6931	233.577	2.70978	18.719	55.9498	8.92808	48.1609	2.17413	14.4306	14.828	573.84	4.18504	57.771	1.49837	8.44591	131.461	15.3255	2.83285
NKX6-2	3.32076	101.428	2.65574	12.0397	15.7523	1.30128	8.91069	0.0492169	1.33177	2.0075	5.6105	1.80033	0.239846	0.302578	0.838596	0.775681	0.696446	7.95812	1.4702	0.147616	0.441917	0.304978	1.97744	5.35243	7.97011	7.32403	0.543953	10.4039	1.72625	0.353427	0.109697	5.01846	1.09332	0.545696	1.88353	4.79777	1.12876	6.92105	0.255658	2.70136	0.385838	0.120711	24.9246	14.5845	2.80785	0.349918	0.187132	0.901684	23.5603
IGFBP7-AS1	0.305523	0.258266	0.311584	0.268759	0.271978	1.77547	2.79131	0.259419	4.72479	4.03227	1.8958	0.53388	17.7498	1.54023	2.59108	3.39989	0.598325	1.08407	0.437463	7.52899	0.596194	0.343069	0.851207	0.559346	4.58164	2.37844	5.8343	3.84037	0.934459	3.96394	0.537552	3.41491	0.950028	1.9099	0.656998	4.16571	3.27148	2.53132	4.53027	0.654541	4.22634	4.5157	1.72019	2.67199	4.69243	2.94078	0.494825	2.23839	0.682264
LIPM	0.0113492	0.0141623	0.123726	0.0269123	0.0626395	0.129584	0.593419	0.149368	0.362723	0.160733	0.370236	0.161787	1.18598	0.0357113	0.5822	0.233741	0.205492	0.178338	0.0959548	0.199842	0.0159663	0.0921813	0.124471	0.372157	1.01871	0.568177	0.0111975	0.255138	1.11912	0.0426607	0.194203	0.169921	0.218802	0.0411095	0.140105	0.284361	0.34397	0.148218	0.297766	0.0779731	0.24192	0.730148	0.043063	0.20067	0.0316616	0.0688308	0.119264	0.248604	0.104755
SPCS2P4	0.956902	1.28835	0.878475	0.955405	0.778312	3.80167	6.80282	7.15307	10.8649	6.30051	6.1186	4.98972	5.91265	3.19585	3.29404	5.76968	5.71273	4.61644	5.61535	7.60614	7.15604	5.69766	4.97118	4.70037	2.09163	4.6871	5.61498	3.42355	7.35383	3.94397	4.49747	5.54758	3.95851	8.0724	5.44015	8.44909	5.41508	4.11082	7.32035	4.03681	4.95724	6.2036	3.79007	4.10616	4.30871	5.40634	5.88051	4.61603	5.61707
FSTL1	4.06562	3.96745	4.36368	4.92521	3.21025	30.6132	37.2108	51.1587	46.683	24.3909	72.5248	37.4212	33.8789	18.7038	43.7836	39.1447	26.7743	14.358	6.23637	34.3665	15.4006	31.8318	42.1862	18.7582	28.0313	15.2935	45.5219	37.0038	42.2187	22.4396	43.0539	35.8969	17.2691	30.6667	28.1295	26.2634	53.3275	38.7462	11.0803	15.0664	43.165	31.8821	11.4151	23.0161	33.0414	41.0222	37.0429	37.2688	15.8461
CA9	0.338867	0.0384417	0.268671	0.389599	0.283378	0.40385	8.59071	4.6175	3.09044	9.75992	49.9823	3.36682	8.38581	14.7662	13.7487	3.62171	0.634341	6.66947	0.368981	12.5736	14.8073	2.85959	22.5241	18.0924	0.481495	2.75495	22.0764	13.488	14.877	143.408	4.72227	6.41327	65.7108	64.999	23.6546	8.12132	10.0628	2.36921	0.237086	15.0976	2.78115	8.10481	0.363655	4.43825	32.0562	44.4288	7.64956	4.09617	34.1056
ARF4-AS1	0.0574496	0.215067	0.031315	0.0681146	0.0634159	0.218651	0.750968	0.252032	0.38252	0.361611	0.226188	0.204741	0.259407	0.271154	0.147354	0.295798	0.367129	0.45137	0.364291	0.466889	0.323284	0.19998	0.433174	0.181139	0.153931	0.47935	0.198386	0.123	0.435768	0.323921	0.0921608	0.122876	0.212994	0.41619	0.390066	0.219043	0.207282	1.00037	0.271311	0.559155	0.612297	0.315511	0.326976	0.338596	0.293829	0.278736	0.368935	0.132466	0.220945
AC111200.2	0.101874	0	0	0.0402618	0.0749689	0.473889	0.739815	0.67038	1.44706	1.06872	0.993179	0.435672	0.481902	0.320553	0.609695	0.61195	0.506347	0.711467	1.07664	0.551946	0.81213	0.669833	0.325875	0.38545	0.181974	0.741039	0.703582	0.581633	0.901522	0.468028	0.726336	0.835256	0.553954	0.86102	0.503048	1.18376	0.637115	1.70001	0.890939	0.855439	0.809002	0.745981	0.773088	0.400281	0.947341	0.7826	0.317198	0.313197	0.83583
LINC02147	0.0260026	0.0324476	0.0566946	0.0154149	0.0430545	0.445342	0.50985	0.285184	0.415523	0.225047	0.160877	0.722818	0.0167731	0.163638	0.0166737	0.167353	0.124626	0.204297	0.0687016	0.193711	1.5181	0.256456	4.06381	0.409933	0.104507	0.133515	0.076965	0.0974258	0.986177	0.0325804	0.111236	0.194655	0.0192809	0	0.11235	0.424896	0.0187638	0.0848967	0.068222	0.193534	0.668385	0.102004	0.0493315	0.076627	0.0362705	0.14193	0.182167	0.134901	0.120004
NEFM	95.0557	9.13411	85.2052	67.1645	80.5925	3.04412	0.187613	0.0858611	0.375308	0.991695	0.127694	0.407341	0.0201997	2.19649	0.0552199	0.786014	0.762938	0.615083	6.11838	0.281002	0.192736	0.0953795	1.24497	0.834316	3.20412	3.82883	0.0772403	1.10624	1.64786	0.0245227	0.347459	0.678149	0.0986843	2.34656	0.430067	0.32834	4.03358	1.94257	0.102699	0.0403392	0.250314	0.141269	10.6937	0.815151	0.0509602	3.41376	0.0182818	1.75548	0.879162
PRPH2	3.34215	1.45969	2.42483	5.60229	2.14358	0.146208	0.351511	0.0947978	0.214859	0.0725409	0.103713	0.123216	0.0446042	0.169229	0.10346	0.148346	0.116609	0.181094	0.158337	0.335616	0.0324262	0.0802338	0.0315988	0.188955	0.208435	0.340258	0.187615	0.209733	0.480795	0.00722001	0.147903	0.129411	0.111092	0.0521811	0.234747	0.0627731	0.332654	0.313561	0.0786157	0.0659819	0.12283	0.0452094	0.255084	0.135848	0.0750191	0.482274	0.0874666	0.212586	0.0709164
AC127496.5	1.2105	0.823927	2.19942	5.41467	1.66014	0.302487	0.319663	0.0804615	1.17235	0.375195	0.309475	0.209164	0.686189	0.769479	0.399865	0.519386	0.351619	0.096067	0.620269	0.422322	0.438637	0.106406	0.32687	0.370105	0.515998	0.706307	0.12667	0.29451	0.208679	0.045961	0.215765	0.392285	0.163197	0.431825	0.158492	0.23976	0.21176	0.838343	0.481202	0.567035	0.597929	0.259013	1.48462	0.28826	0.34111	0.222467	0.299812	0.0634349	0.197504
RN7SL477P	0.0599605	0.149645	0.0653673	0.0710916	0.0661876	0.456415	0	0.328809	0	0	0.269798	0.59833	0.232067	2.26404	0.461383	0.154363	0.25545	0.62813	0.887163	0.162432	0	2.22635	0.73981	1.43683	0.401647	0.307877	0.059159	0.256752	0	0.0751285	0.641259	0.961852	0	0.542976	0.370104	0.0653191	0.0865366	0	0	0.0686581	3.08252	0	1.66842	0.70679	0.390309	0.436378	0.210033	0.345639	0.276722
SAMSN1	1.16886	1.256	1.55153	1.53342	1.8398	5.23814	25.583	3.12179	20.0477	5.56905	9.50833	3.64878	8.53811	1.27138	5.85729	10.1001	3.16418	4.33666	3.75738	7.58621	1.61392	3.59784	4.41406	7.52784	8.57636	10.4057	5.49389	22.0016	6.32118	5.08522	2.95153	4.92482	9.28504	1.76411	3.14643	14.0773	3.91274	7.76207	7.44526	2.26786	2.6666	12.9151	8.32945	3.04053	4.09618	2.01509	5.68659	5.11576	4.40375
PDP1	30.5451	6.55764	35.1312	28.2503	23.6967	4.33718	4.84095	2.82639	5.918	5.17742	5.00943	4.25396	6.66119	4.75426	5.9623	6.02768	2.75127	4.28032	5.46001	4.82547	1.43812	3.51935	5.47563	3.59374	3.43198	4.32957	3.48174	7.05086	4.00468	5.97472	3.12595	4.32052	4.01694	3.34251	4.15993	2.4406	4.94724	5.74916	11.862	3.05951	2.73625	5.18674	4.49427	3.79414	4.57374	6.00669	3.09835	5.24697	4.3411
TNFSF13B	0.756808	0.538653	1.56454	0.498501	0.643571	4.33836	22.8146	2.01667	19.0665	13.1	7.27733	12.8504	11.6296	5.20958	7.40515	15.9475	5.00352	5.72586	5.11889	10.8204	2.19247	3.30441	4.50362	6.54003	14.9757	8.97368	9.32535	18.0337	7.35642	2.86584	2.59002	8.09952	4.34805	1.3199	3.61944	7.66427	7.34636	12.0069	6.53633	1.74601	4.74473	18.5607	3.24738	9.07513	2.87764	5.34466	5.13833	5.57117	3.35474
EHD3	56.7653	19.2944	60.4484	54.5058	50.6968	4.51447	4.46458	4.9819	3.3102	2.71249	4.29003	3.85463	6.34219	4.60528	7.85111	3.69486	5.03105	13.9306	17.3377	4.26376	2.9766	6.58402	3.37227	8.52339	22.3399	6.02088	5.20796	6.70004	5.96232	3.09602	7.27508	6.27002	5.546	3.21569	5.50254	5.06119	16.448	7.62467	4.49148	11.4573	3.23742	3.11689	17.7922	6.28605	3.07174	6.79746	3.93034	6.85316	3.272
SEC11B	0	0.0428842	0	0	0	0.34879	1.19794	0.489985	0.457645	0.594864	0.425243	0.293941	0.177344	0.180226	0.39666	0.796253	0.256217	0	0.290557	0.279291	0.338428	0.319006	0.188453	0.693484	0.552486	0.264688	0.10172	0.183946	0.52135	0.430596	0.441042	0.110256	0.50965	0.248964	0.169699	0.861061	0.148794	0.149604	0.396727	0.432863	0.0861821	0.754951	0.0869315	0.607641	0.159789	0.125054	0.280886	0.594305	0.317205
NUAK2	0.39787	1.58373	0.296485	0.376191	0.667124	1.42483	2.30418	0.955584	1.83765	0.919319	2.60607	1.8164	3.65155	3.16944	1.96997	2.76167	1.105	1.02881	0.819681	2.13518	0.906904	1.33822	1.91252	1.11157	1.92295	0.620637	3.65222	6.55058	1.75728	7.28846	1.36271	2.53142	3.87635	2.71816	1.7595	1.33869	1.45371	0.723504	3.65753	0.645891	1.73661	1.83342	1.05103	3.21567	5.40931	2.70012	1.84648	2.27608	2.24683
RPL37AP1	0.12293	0.383499	0.134015	0.291501	0.339241	5.45844	16.3369	6.876	15.2243	12.7672	5.25478	6.83438	4.3613	4.25489	3.8625	14.7159	5.89182	8.69252	10.978	7.24306	10.8952	4.06518	5.3086	7.67447	7.32869	10.336	10.0061	4.7375	10.0238	7.47031	5.45598	3.74674	6.65413	8.79426	8.80184	14.396	5.67729	9.23122	5.74097	8.86797	4.70125	15.335	7.6185	8.57352	4.62975	5.96435	5.31079	4.03914	11.4412
RPS5P3	0	0	0	0	0.0307299	0.211907	0.606504	0.427452	0.741444	0.569493	0.281843	0.277796	0.0718302	0.116796	0.178511	0.645017	0.355805	0	0.205949	0.188537	1.17492	0.0969058	0.114494	0.105331	0.0745916	0.393093	0.219733	0.0596033	0.422327	0.209287	0.208409	0.297716	0.24771	0.403353	0.240567	0.515555	0.200888	0.424162	0.233727	0.223139	0.0698131	0.262097	0.14084	0.109384	0.284766	0.202604	0.325051	0.19257	0.77087
RNF122	0.670158	1.20285	0.670539	4.04903	2.38141	8.11766	6.76012	16.0088	4.57218	9.37548	3.42852	14.5656	11.7843	22.7913	14.128	11.0369	7.58746	10.9634	5.31674	13.3423	14.5809	9.11813	21.735	13.9864	12.84	36.7908	5.41641	3.46911	6.44117	6.54495	5.39007	8.61987	8.64509	4.05685	29.0577	7.75053	7.44604	2.45778	7.72675	18.4379	15.7124	5.51713	5.65457	5.80743	4.30259	6.71457	9.31483	8.27653	37.0575
AL592295.1	0.0581969	0.0242073	0.084593	0.0460005	0.0428273	0.39377	0.92979	0.680828	0.774993	0.48842	0.480083	0.719002	0.400429	0.671445	0.373177	0.948878	0.805793	0.609656	0.656053	0.420411	0.68227	0.292617	0.505295	0.636119	0.337856	0.747055	0.63161	0.249201	1.03002	0.65627	0.373439	0.560138	0.517837	0.456738	0.622645	0.95097	0.223977	0.168897	0.346095	0.488684	0.267564	0.700111	0.44164	0.495446	0.432948	0.447073	0.679518	0.424932	0.865436
HMGN3P1	0.0888534	0	0.0968655	0	0.0980811	0	0.387157	0.1949	0.709942	0.13982	0.199903	0.126664	0.229261	0.745558	0.341854	0.45749	0.473177	0.930805	0.281712	0.120351	0.125	0.103098	0.365433	0.784437	0.238075	0.456233	0.525994	0.190236	0.673973	0.222661	0.285078	0.760179	0.13177	0.48277	0.219378	1.06474	0.384707	0.580201	0.559491	0.610452	0.334235	0.418269	0.449522	0.174561	0.743638	0.323327	0.207494	0.307314	0.136688
TSKU	1.72276	1.2536	1.4165	3.98179	1.68172	11.9812	6.25843	13.2944	3.53797	6.34293	14.859	6.77578	3.90418	6.18275	4.50393	8.31445	14.953	6.26215	4.88294	6.28065	16.2878	6.43999	6.40807	7.28788	2.70285	4.54013	10.4892	5.72376	6.97458	12.5716	10.2111	5.33177	7.41214	9.24754	7.95858	10.3333	5.83538	5.70149	5.64175	11.4319	2.51929	1.47864	3.43901	7.16868	6.25369	2.95066	14.0225	10.0647	6.76924
RPL7P47	0.0925289	0.115463	0.100873	0.0365687	0.0680923	0.586937	0.806345	1.2516	1.72506	1.01923	1.07555	0.615548	0.835607	0.452899	1.2262	1.98506	0.295651	1.93862	1.49942	0.919083	0.737637	0.715755	0.295983	0.855786	0.578487	1.0294	0.85206	0.297159	1.16976	0.502388	0.626726	0.593719	0.640362	0.782041	0.685358	1.37758	0.445134	0.671335	0.744479	0.776973	0.348061	1.30671	0.507127	1.27248	0.37286	0.29929	0.612218	0.320027	1.42343
AC048334.1	0	0	0	0	0.119054	0	0	0.236577	0.574502	0.678873	0.121325	0	0	0.113123	0.414955	0.555318	0.229744	0.564922	0.911873	0.292173	0	0.250289	0.443576	0.408076	0.577967	0.138448	0.425647	0.230916	0	0.270274	0.346038	0.115342	0.159947	0.390669	0.133144	0	0.311314	0.234756	0.339565	0.123498	0.405706	0.676946	0.272823	0.211889	0.20059	0	0.125932	0	0.165917
GGTLC4P	0.129132	0	0	0.0612416	0	0.0655295	0.450128	0.226601	0.206354	0.121921	0.0871563	0.147265	0.133275	0.29797	0.662427	0.199463	0.192549	0.135275	0.163766	0.559704	0.108999	0.389569	1.09758	0.195434	0.207598	0	2.52263	0.414709	0.195899	0.129438	0.359066	0.49715	0.727709	0	0.0318824	0.0281344	0.186366	0.0562142	0.216831	0.0591453	0	0.202625	0.163324	0.608861	0.0720493	0	0.392019	0.595498	0.158921
LINC01385	0	0	0	0	0	0.13946	0	0	0	0.242175	0.0741946	0.376093	0	0.0461194	0.169174	0.169799	0.140497	0.115157	0.0929409	0.238233	0.0618591	0	0.0301404	0.110913	0.0294541	0.0282221	0.303683	0.188285	0.166765	1.90075	0.188103	0.282143	0.35865	0.0796364	0.135705	1.43702	0	0.478542	0	0	0.248105	1.41443	0.111228	0.604698	0	0.666688	0.205366	0.836446	0.0676433
AC104966.1	0.0117136	0.0438508	0.0255397	0.0416644	0.0129301	0.0891631	0.510391	0.115622	1.52867	0.202758	0.15812	0.0333963	0.408019	0.0491436	0.540801	1.59825	0.374275	0.0613543	0.0371383	0.809163	0.0494366	0.285422	0.144526	0.0443198	0.219699	0.0751818	0.0462281	1.06586	0.133275	0.249505	0.150328	0.250537	1.04228	0.0636439	0.043381	0.0638022	0.355013	0.254961	0.184395	0.0536509	0.0293749	1.08443	0.088891	0.115063	0.0108927	0.0852487	0.642819	0.0810268	0.0720789
MTND4LP5	0	0.073285	0.0640241	0	0	0	0.51179	0.0644106	0.156414	0	0.0660637	0.334878	0.681895	0.0615979	0	0.604765	0	0	0.620667	0.556829	0	0.0681438	0	0.148137	0.157358	0	0.17383	0.125738	0.668203	0.14717	0.0628082	0.0628059	0.174189	0.212727	0	0	0.254275	0.12783	0	0.0672473	0.368192	0.184306	0.0742788	0.115378	0.109225	0.213706	0.137145	0.0677073	0.180691
RPL7P26	0.0909745	0.0283809	0	0	0.0753169	0.3751	1.4865	0.399106	1.15091	0.679998	0.17909	0.194531	0.176051	0.262404	0.583358	1.17103	0.169566	0.714769	0.480729	0.246448	0.223973	0.475018	0.498876	0.831848	0.243758	0.233562	0.403913	0.219125	0.948836	0.199479	0.26756	0.218904	0.876949	0.494295	0.308845	0.495524	0.196945	0.445539	0.381898	0.260427	0.171107	0.892195	0.230126	0.491503	0.274947	0.386219	0.239003	0.340871	0.209927
CAMK1D	41.5311	7.39765	44.286	70.7474	30.4058	3.59286	2.56689	4.59357	2.01207	2.01727	5.95538	2.04787	3.3784	6.7968	4.55564	2.73594	4.28579	5.27946	5.58059	2.7411	1.13164	2.40266	9.34532	5.27989	7.30759	3.20325	1.83639	4.34117	4.75058	3.19285	8.30554	6.62869	3.6281	5.0015	4.36832	2.91242	11.1517	4.94162	3.34388	2.23434	2.85161	1.75972	6.24542	4.0027	3.46166	4.68383	3.05763	4.96858	3.4474
INSYN2B	1.51531	5.18747	1.39013	3.57288	1.12985	0.0797979	0.0498308	0.00627138	0.0609175	0.170963	0.122215	0.105968	0.228688	0.119951	0.168666	0.0588834	0.0669927	0.239607	0.622447	0.22461	0.0321775	0.145967	0.148943	0.620211	0.176194	0.0880823	0.163609	0.550918	0.759034	0.114634	0.165115	0.293527	0.5512	1.20132	0.232947	0.137042	0.313598	0.174247	0.0240039	0.242261	0	0.0717802	0.108483	0.337016	0.0478567	0.478575	0.0133532	0.751531	0.475014
SPHKAP	6.80908	1.98452	5.87871	5.47975	3.96472	0.173823	0.13859	0.0107336	0.0521306	0.142453	0.0660542	0.0313903	0.738614	0.472183	0.891125	0.0377924	0.101629	0.871443	0.266331	0.487156	0.0516302	0.0255503	0.459524	0.521492	1.49468	0.57789	0.0168978	0.0497643	0.213423	0.0030656	0.0444828	0.102045	0.0108852	0.177248	0.972567	0.282525	0.946334	0.399411	1.41223	0.753623	0.0337462	0.0460698	0.674603	0.144202	0.125136	0.922958	0.00571355	0.0648769	0.158082
PKMP5	0	0.0267323	0.0467084	0.0253994	0.0118236	0.203833	0.653403	0.364175	0.513499	0.38767	0.289178	0.183231	0.124368	0.0449384	0.192315	0.992705	0.239574	0.224416	0.181121	0.174099	0.376719	0.16157	0.0881057	0.202636	0.157849	0.206245	0.433291	0.171997	0.771848	0.442888	0.217651	0.206188	0.33358	0.349187	0.304128	0.256707	0.24734	0.256458	0.179857	0.17171	0.0940144	0.268918	0.121927	0.273563	0.16933	0.272838	0.287653	0.284024	0.2966
GZMA	0.28773	0.119682	0.167293	0.136458	0.402308	1.87382	12.8714	0.568023	5.00665	6.42936	0.280512	1.01175	3.36557	0.362146	3.14883	1.43209	0.490326	1.50709	0.222996	4.0012	0.566696	1.31318	0.552237	0.653196	4.85696	3.47188	0.984131	5.38003	6.47474	0.889273	0.143602	0.861579	1.08098	0.208444	0.26048	1.31646	0.27684	10.104	2.01308	0.131787	2.5495	3.4915	0.800616	0.113055	1.15945	0.139602	0.425548	0.420179	0.413123
AC090409.1	0.11442	0.107085	0.0467766	0.0508729	0.126303	0.598783	1.49567	0.392158	0.380925	0.337596	0.643556	0.265053	0.369036	0.540047	0.458561	0.220923	0.56363	1.19863	0.332541	0.368079	0.503024	0.348505	0.41176	0.685459	0.153289	0.403913	0.790234	0.33684	2.60371	0.663061	0.244737	0.260024	0.466634	0.0518068	0.476721	0.545325	0.288984	0.435836	0.315209	0.262035	0.717345	0.538621	0.307523	0.42148	0.332504	0.294922	0.350697	1.71488	0.440048
ESM1	0.3627	0.0397017	0.298288	1.71258	0.618111	2.95459	6.87602	21.3412	3.1183	1.49195	13.1348	1.24271	2.83216	0.654057	6.84667	10.8281	1.369	11.6653	0.22192	3.663	0.581866	7.54573	4.16978	4.26141	0.0596732	1.24973	16.1787	3.99853	16.1691	2.30415	9.63615	12.174	4.0011	2.01677	7.80028	1.94784	15.217	2.50688	0.25376	6.1641	2.23402	9.82489	0.152912	0.912577	4.30182	0.602023	9.27974	8.16498	2.77024
AC100854.1	0.100579	0	0.0548242	0.11925	0.166537	0.638	0.657372	0.386086	0.133938	0.633084	0.339424	0	0.648789	2.42634	1.03191	0.776794	0.214248	1.31705	0.584628	0.817398	0.070748	0.641871	0.896258	0.126851	0.269492	0.38733	0.396938	0.430682	0.381457	0.315055	0.484047	0.107562	0.149158	0.455399	0.186246	0.109568	0.145158	0	0.369439	0.115168	0.567513	0.315644	0.508842	0.592792	0.374121	0.121998	0.0587189	0.695737	0.928359
EEF1A1	162.388	228.847	167.287	170.373	183.877	1209.53	1513.42	580.012	1105.34	2285.68	701.418	858.234	707.222	485.502	856.757	687.698	1348.17	604.4	759.184	1161.5	2062.45	1121.68	923.255	1310.15	511.867	1610.01	746.309	691.273	1376.51	991.711	1032.57	890.33	1119.76	1387.52	1329.62	1538.72	683.41	1181.87	683.022	1926.04	700.228	1616.13	785.527	1595.48	715.268	748.524	1161.14	758.839	1993.36
TFAP2A	0.0270386	0.109007	0.0249418	0.118368	0.043622	0.094992	0.226566	0.0798394	0.0997105	0.981875	0.0865678	0.0563342	1.20748	11.1846	2.82743	0.337333	0.487353	4.15069	0.435227	0.724018	0.983143	3.24353	4.76178	3.11895	1.59384	2.55241	1.43236	0.178123	0.173541	0.0521207	0.0778532	0.402598	0.308448	0.0263684	4.74494	0.69106	2.71359	0.140341	1.09357	2.86982	0.260794	0.169709	0.0578735	0.952074	0.0406168	0.592863	0.318136	1.29246	3.20602
PPIAP16	0	0.131823	0.115165	0	0.0388699	0.312712	0.920591	0.617918	1.7819	1.21904	0.475333	0.501973	0	0.443201	0.270956	0.725221	0.112513	0	0.40936	0.476955	0.247691	0.24515	0.241371	0.133232	0.28305	0.27121	0.382165	0	1.06839	0.529448	0.225955	0.414235	0.469987	0.510196	0.304291	0.767198	0.203281	0.459871	0.332593	0.161283	0.176611	0.607792	0.534441	0.138359	0.130981	0.341695	0.493383	0.365369	0.270851
HOXA9	0	0.00706478	0	0	0	0	0.296024	0.211115	0.72377	0.0801805	0.127373	0.274403	0.0219119	1.29451	0.10891	0.218626	0.0120599	1.18617	0.0777831	1.22695	0.25487	0.0788299	0.116422	1.00679	0.978432	4.90556	0.111717	0.0242427	0.150303	0.0354684	0.217973	0.115037	0.0755641	0.0717753	5.48643	0.0493398	0.155246	0.87493	0.594155	1.30303	1.38428	0.195441	5.23439	0.122348	0.0684417	1.17429	0.0330524	0.411206	0.00870944
RPL5P11	0.0768139	0.0479266	0.0628053	0.0227684	0.0423956	0.194901	0.502047	0.189553	0.664891	0.42306	0.172816	0.164251	0.148647	0.140992	0.320161	0.444939	0.163625	0.201171	0.385606	0.364153	0.108063	0.20054	0.342244	0.50861	0.308724	0.320461	0.303149	0.267247	0.582651	0.288736	0.184838	0.143757	0.22783	0.173898	0.260772	0.794948	0.11086	0.459786	0.221687	0.131934	0.264868	0.512258	0.170018	0.603634	0.0892884	0.163051	0.201801	0.177116	0.32496
AC087650.1	0.0366425	0.0914496	0	0.0434449	0	0.27892	0.957965	0.321502	1.36628	0.345964	0.247315	0.156705	0.189091	0.230597	0.328949	0.565998	0.507351	0.767715	0.735782	0.645215	1.03099	0.510205	0.100468	0.600779	0.196361	0.470368	0.578444	0.19613	0.694855	0.367295	0.235128	0.11756	0.326045	0.398182	0.361879	0.678593	0.370184	0.638055	0.269185	0.797197	0.0459454	0.747462	0.556139	0.503915	0.340746	0.133338	0.641767	0.253468	0.95828
LRP11	26.95	22.2828	26.6996	26.6343	25.4394	5.9127	3.2754	2.62757	2.29915	4.29657	8.46146	2.50268	7.17018	7.51814	6.92244	6.44238	6.07444	7.84932	9.25138	6.58864	4.12091	5.89174	5.85744	3.85341	4.9314	5.36635	4.84234	6.03274	4.30401	5.28054	5.93353	6.89799	4.9626	7.81725	4.57405	4.30578	5.50843	4.13798	5.9447	6.46396	4.68237	5.00732	9.00454	6.96483	7.45482	9.41207	4.95482	8.61606	3.28269
GPR150	1.50311	0.880839	1.73823	1.84122	1.65004	0.0948194	0.398031	0	0.132706	0.0914752	0.0653918	0.0355149	0.11785	0.209045	0.0958515	0.23517	0.0972935	0.130493	0.157977	0.269959	0.350485	0.202352	0.250465	0.209473	0.333766	0.756871	0.122902	0.12446	0.314956	0.0936469	0.0976949	0.133215	0.0862086	0.150403	0.17428	0.0542797	0.203749	0.307286	0.0174305	0.0190181	0.156192	0.0130308	0.955805	0.195779	0.200784	0.0906567	0.0872679	0.191482	0.191629
HOXC10	0	0.0183605	0	0.00872253	0	0.0186665	0.35261	2.99345	0.626999	2.73209	0.115859	0.555831	0.0664375	15.9649	4.78346	0.359849	3.27526	11.7529	0.101075	7.42371	18.1119	13.6751	8.78455	0.0649491	2.5724	4.31576	5.72693	0.267767	4.54794	11.9463	0.11015	2.81659	6.07695	0.13324	11.3615	12.9671	4.50183	7.7823	5.18059	1.63425	9.17843	7.57274	10.4213	6.99533	0.38995	3.29277	3.08379	3.62163	3.07834
RPL31P61	0.0456082	0.170738	0	0.162225	0.10069	0.347167	1.58981	0.300126	0.850294	0.358846	0.256524	0.715177	0.176519	0.813223	0.233964	0.821901	0.194305	0.47778	0.482007	0.308879	0.641624	0.582122	0.375152	0.287607	0.0611016	0.819642	0.539983	0.146472	0.518923	0.228582	0.682872	0.292649	0.405822	0.330406	0.225212	0.447158	0.592407	0.694903	0.430778	0.208896	1.25812	0.572524	0.634531	0.806417	0.339296	0.221284	0.159759	0.315487	0.420971
PSMC1P9	0.0256909	0.0160294	0.0420113	0.0304602	0.028359	0.179261	0.223884	0.225413	0.410543	0.141495	0.101149	0.054935	0.0497162	0.0808385	0.0494216	0.231487	0.123132	0.0672829	0.135756	0.0695962	0.0542136	0.104334	0.158491	0.0810039	0.137673	0.115425	0.10139	0.0687558	0.146154	0.0643798	0.0824269	0.164848	0.0571495	0.209381	0.174434	0.125941	0.129772	0.111839	0.0674043	0.11767	0.0644268	0.16125	0.129974	0.126181	0.0836168	0.0934862	0.0599944	0.0888564	0.0790438
MIR25	1.42906	1.78327	0.66768	0.4841	1.35212	8.54692	2.66862	3.13465	3.26235	8.99507	4.82265	13.0961	4.47741	22.9115	5.23633	3.15341	6.08821	4.27727	6.47267	12.9965	5.16965	10.6596	10.9151	15.1911	7.65807	6.28949	3.6256	1.74836	6.9684	5.88328	12.6633	6.98641	2.72481	6.28559	6.80462	2.22396	2.94636	1.33308	3.64224	5.14282	13.823	3.84409	3.3567	2.40645	7.02424	8.41932	8.81971	7.06091	4.08275
AC113383.1	1.12656	0.827853	1.11897	0.623323	1.14683	0.0794007	0.709034	0.0274568	0.133352	0.256064	0.239372	0	0.177636	0.105031	0.385272	0.0322247	0.0799911	0.721204	0.10583	0.135636	0.0176095	0	0.0343205	0.0315738	0.150925	0.321361	0.18525	0.294797	0.0474733	0.0470513	0.0267737	0.160636	0.111379	0.0680107	0.0463575	0.0818158	0.433567	0.190718	0	0.057332	0.0313904	0	0.221644	0.147549	0.0698405	0.106281	0.0292308	0.144311	0.192561
CATIP	0.0628322	0.0616046	0.0440344	0.0212847	0.0495411	0.119569	0.938661	0	0.502032	0.0494364	0.393788	0.0575804	2.75605	0.080024	0.195694	0.207972	0.0334605	0.235076	0.0711468	0.571423	0.0568242	0.109358	0.0738326	0.164149	0.198416	0.178595	0.557931	0.365138	0.306383	0.10122	0.148793	0.0911927	0.119803	0.0325132	0.0332425	0.0977821	0.226703	0.351673	0.390931	0.0411122	0.377038	0.274649	0.403022	0.141074	0.417349	0.119763	0.0681237	0.238012	0.0552335
HOXD4	0	0	0	0.0138881	0	0.029721	0	0.822202	0.343171	0.0184325	0.0263533	0.233774	0.241789	3.07148	0.781157	0.75389	0	1.10438	0.581833	0.729833	0	0.937815	0.770804	3.38307	0.721867	0.811963	0.369825	0.0376184	0.666377	0.205475	0.425929	0.250537	0.295312	0.0212146	0.694096	0.089323	1.06504	0.178472	0.319618	1.62294	0.939997	0.220562	0.607422	0.161088	0.0435708	0.29837	0	0.24308	0.558612
C21orf62	0.399388	0.747571	0.42633	0.670835	0.183694	7.29943	3.73425	8.91572	6.85869	4.05891	14.4001	9.47122	28.5751	7.82386	8.50999	20.2425	11.9815	6.7988	0.479248	8.85832	7.73149	10.4221	6.69582	1.18582	8.14297	2.27502	43.5588	12.7507	8.50453	22.0497	12.2979	25.2666	27.5848	4.21192	5.32073	12.0961	8.43595	11.2196	19.2588	1.1433	6.68234	7.37017	2.44677	6.50594	16.7748	16.7132	12.2024	36.5434	2.25921
HOXA-AS3	0	0	0	0	0	0.0218761	0.0500897	0.41291	0.574069	0.140195	0.210137	0.167972	0.00370767	0.274305	0.265371	0.118379	0.0336704	0.240852	0.021261	0.358128	0.2628	0.0666934	0.051219	0.340713	0.138607	0.206593	0.119091	0.0492249	0.174395	0.15484	0.162899	0.199775	0.225888	0.0780749	0.447027	0.0657461	0.0373295	0.231452	1.15817	0.111887	0.234231	0.329199	0.174475	0.0338767	0.0507778	0.397398	0.0335565	0.241872	0.0840015
TMEM72-AS1	0.696341	0.272354	0.713811	0.271096	0.481846	0.059334	0.113214	0.0569936	0.138403	0.0572413	0.116913	0.0888948	0.0737456	0.207118	0.246584	0.173916	0.0553474	0.163314	0.856746	0.126697	0.0731062	0.174861	0.178102	0.209727	0.146199	0.133413	0.0717796	0.255897	0.27592	0.0586002	0.144497	0.138934	0.0847718	0.00941158	0.0705665	0.0566099	0.164996	0.0678659	0.0545362	0.0654541	0.201992	0.0489248	0.111733	0.25523	0.072486	0.100852	0.121352	0.083875	0.111919
ROGDI	28.4167	75.9925	27.7355	32.4885	40.0591	10.68	8.62247	5.888	7.16779	8.46997	11.2664	9.43858	10.5362	13.9429	6.45506	5.96948	7.64705	11.6333	11.4557	8.96188	7.41503	5.65658	7.28329	11.4629	14.9522	14.2133	6.56933	7.39197	7.96424	7.53758	8.44048	12.6876	3.05897	4.62964	8.30588	7.86206	8.89045	14.7663	7.9601	8.60518	10.5089	4.42754	24.6575	14.6909	8.27438	12.6679	6.16515	8.60499	26.825
CACNA1I	5.48212	1.17981	6.20512	6.63924	5.9427	0.161273	0.0484664	0.0313697	0.0550174	0.10502	0.0214499	0.0520996	0.0492002	0.546664	0.0713251	0.0327263	0.116777	0.0998769	0.634792	0.0796355	0.0223546	0.0553131	0.119813	0.10822	0.500272	0.159102	0.0595756	0.312994	0.180796	0.0358378	0.0934674	0.137647	0.0424173	0.10936	0.274628	0.0363516	0.231625	0.13143	0.0383553	0.0436684	0.0478186	0.0872685	0.403963	0.109262	0.0280756	0.33537	0.0315413	0.194188	0.726012
NCAPG	0.0383328	0.0608797	0.0835787	0.0619758	0.0153868	4.39006	1.06289	5.93933	1.58709	3.91535	4.90007	2.93094	1.79381	8.73195	2.61891	4.24343	6.26884	8.14081	0.180461	7.25483	4.67205	2.55548	8.36998	4.01708	1.98883	4.27203	1.25151	0.2201	2.35254	5.85963	4.94557	2.63108	0.568476	11.3289	6.22493	3.79244	2.228	0.470276	8.83939	4.68061	1.88763	1.95212	0.440752	0.712009	3.73639	3.91836	4.5165	2.49492	3.58643
NEUROD2	10.2997	2.98944	11.0876	16.0521	10.3291	0.44613	0.0359122	0.0783411	0.0658533	0.42367	0.0247236	0.109659	0.0425319	2.94782	0.320622	0.0565816	0.447692	0.330971	0.952339	0.148848	0.0579743	0.0414409	0.440662	0.346492	2.39974	1.81269	0.0243953	0.0382332	0.60433	0	0.226238	0.343752	0.0407426	0.462738	1.74664	0.104749	0.685943	1.41722	0.106679	0.034604	0.137792	0.0517307	4.22877	0.442584	0.0485408	0.379891	0.0962342	0.40542	7.69196
RPS4XP17	0.0454873	0.0283809	0.099178	0.215726	0.0251056	0.461661	0.594599	0.773268	1.02976	0.858945	0.614024	0.291797	0.264076	0.238549	0.612526	0.936824	0.508697	1.07215	0.408619	0.431284	0.831898	0.501408	0.623595	0.71711	0.304698	0.671491	0.426353	0.267819	0.77632	0.854911	0.583766	0.243227	0.775763	1.27693	0.449229	0.743287	0.328242	0.495043	0.262555	0.494812	0.199625	1.24907	0.287658	0.491503	0.211498	0.19311	0.45145	0.31465	0.874698
AC021224.1	0.0400203	0.174789	0.109073	0.118624	0.0883531	0.456948	0.261568	0.899794	0.53294	0.346368	0.472698	0.199676	0.516306	0.314818	0.384935	0.566658	0.660682	0.524053	0.465247	0.487864	0.365958	0.394709	0.301756	0.630923	0.294885	0.410982	0.29614	0.192789	0.227672	0.376081	0.535006	0.577785	0.267076	0.61609	0.666964	0.893736	0.202154	0.0871091	0.587999	0.549906	0.275994	0.408182	0.227777	0.314495	0.297725	0.339801	0.44392	0.230695	0.461742
RPL35AP33	0	0	0	0	0	0	0	0.112622	0.136745	0.080794	0.0577563	0	0	0	0.0658461	0.132179	0	0.26893	0	0.0695441	0.144461	0.238299	0	0.259018	0.068785	0.131816	0.0506571	0.109927	0.389451	0.128663	0.0549102	0.164724	0	0.0929886	0.063383	0.111864	0	0.111755	0.0538831	0.0587911	0.128757	0.241694	0.129877	0	0.0477453	0.124555	0.0599495	0.0591932	0.0789847
SPCS2P1	0.0252558	0.0315158	0	0	0	0.0961228	0.330138	0.138497	0.470855	0.0794851	0.170462	0.0720061	0.0325828	0.0264898	0.0647793	0.325094	0.188295	0	0.240223	0.342087	0.177651	0.117219	0.0692475	0.191117	0.0676707	0.12968	0.174428	0.135183	0.383142	0.126579	0.189072	0.162056	0.0374544	0.0914822	0.0935343	0.110052	0.145799	0.0549724	0.212041	0.115677	0	0.158519	0.0638863	0.0992351	0.0469718	0.0919028	0.0884675	0.0582343	0.15541
TREM1	0.0594203	0	0.0561413	0.258321	0.306093	0.42215	24.1304	0.942784	35.7766	2.03215	2.88757	1.11811	5.1208	0.664785	7.97606	6.49622	0.548488	1.30719	0.171648	16.3919	0.785778	0.629712	2.77509	4.24167	0.41395	2.37472	5.07702	18.4172	1.83291	3.80696	0.982878	1.6183	11.532	3.25003	1.39861	3.1416	3.08153	4.11287	0.856404	2.73973	1.66893	14.9368	4.10841	2.54487	1.12722	1.85952	12.0999	11.9701	1.20661
LINC01952	0.0473721	0.0591139	0.0516438	0	0.313751	0.240396	0.412825	0.259777	0.75701	0.596358	0.426311	0.270122	1.16119	0.794987	0.789789	0	0.201819	0.248129	0.200259	0.51332	0.199931	0.0549668	0.584491	0.059746	0.634646	0.72972	0.186956	0.202849	0	0.890335	0.050663	0.405289	0	1.02955	0.409363	0.206423	0.136737	0.928	0.198861	0.542437	1.06918	1.18933	1.19831	0	0.969149	0.632065	0.0553125	0.163844	0.437252
AL365258.2	0.036332	0.0906746	0	0.12923	0	0.553113	1.26646	0.757097	1.45147	1.0291	0.367829	0.82868	0.328106	0.457286	0.698917	1.403	0.503052	0.951511	0.691149	0.492113	1.48226	0.505881	0.846741	0.87062	0.389393	0.792849	0.645235	0.0777873	1.51572	0.546273	0.271991	0.505108	0.915966	0.921218	0.403664	1.66232	0.629224	0.79081	0.381292	0.748839	0.364448	0.456078	0.459521	1.14204	0.304073	0.352554	0.509063	0.209434	1.11783
NPM1P24	0.019182	0.047873	0.0836467	0.022743	0	0.486707	1.17013	0.778402	1.02177	0.362217	0.582602	0.601581	0.197975	0.563338	0.516604	0.64197	0.388175	0.602837	0.405447	0.389727	0.404783	0.400631	0.499643	0.435464	0.28268	0.837192	0.435289	0.102672	0.800249	0.504722	0.348747	0.328221	0.45515	0.833777	0.26048	1.27467	0.166104	0.20876	0.825364	0.39536	0.168364	0.722379	0.339655	0.263794	0.428105	0.395539	0.268767	0.33172	0.678703
RPS2P28	0	0	0	0	0.0255461	0.11744	0.100838	0.15229	0.246548	0.0364173	0.104133	0.263925	0.119426	0.339827	0.178078	0.417051	0.123243	0.121218	0.269039	0.0626929	0.423247	0.0537058	0.0634535	0.379439	0.0930129	0.297075	0.182667	0.0495487	0.438856	0.405958	0.148502	0.173246	0.411847	0.251483	0.228555	0.201687	0.167	0.100746	0.194299	0.158998	0.0870544	0.290511	0.117082	0.272796	0.129125	0.168427	0.0810653	0.160085	0.249212
CNTN3	7.73017	1.07226	7.08428	6.61822	6.38028	0.174591	0.175505	0.0220879	0.134096	0.248249	0.0339822	0.0287094	0.199195	0.665387	0.606959	0.095053	0.13585	0.861482	2.51508	2.64148	0.0377766	0.0233682	0.179462	3.34856	0.476662	1.34432	0.0298053	0.140136	0.216413	0.00841134	0.0646154	0.136405	0.00995558	0.261402	0.0787295	0.0255958	1.63737	0.547948	0.070452	2.20999	0.13468	0.0316014	0.840576	0.145075	0.037456	0.162855	0.0274343	0.197357	0.0619633
AC124312.2	25.3014	2.65611	21.716	18.4276	12.1912	1.27376	0.174991	1.2333	0.213925	1.01116	1.08425	0.400755	0.414495	1.39006	0.978593	0.413563	0.727164	4.83822	4.66881	0.65277	0.282495	6.29093	1.26632	1.82344	0.161411	0.515532	0.554737	1.28977	0.609259	0.452883	1.54623	2.10451	0.893379	1.16377	1.43777	1.05	2.20253	0.437075	1.09583	0.965716	0.251785	0.252071	0.20318	3.7083	0.448157	1.60755	1.07853	1.62054	0.988511
ADAMTS8	6.61607	6.11271	7.27466	4.83244	7.76773	0.437713	0.396487	1.2059	0.434211	0.310243	0.77623	0.318885	0.200546	1.04985	1.50734	0.458755	1.62335	0.893659	2.48031	0.364618	1.70684	0.24636	0.535371	0.502088	1.73208	0.963657	0.452633	1.56668	0.747733	0.907356	1.37459	1.84893	0.26989	0.247202	0.791006	0.888011	2.14499	1.3039	0.306382	8.36591	0.713103	0.154681	2.23943	6.20474	0.222121	2.50178	2.46139	1.39001	3.95451
DPPA4	0.00343249	0.0342662	0	0	0.0341007	0.156767	0.284168	0.0451751	0.0365676	0.129633	0.0695017	0.137008	0.0619959	0.0756041	0.0484224	0.0618564	0.0329027	0.0179789	0.0145104	0.148777	0.00965775	0.055759	0.070585	0.0779233	0.0137956	0.0176247	0.0541857	0.044094	0.221307	0.0430079	0.0660768	0.0697452	0.0661749	0.38543	0.0466111	0.0373925	0.0198154	4.22124	0.0144091	0.00786078	0.0688629	0.0538603	0.060779	0.0337173	0.0319194	0.0832693	0.0200392	0.514446	0.0211216
AC097638.1	0	0.0415519	0	0.11844	0	0.337954	1.59599	0.219121	0.975538	0.471586	0.187287	0.379745	0.214793	0.139702	0.21352	0.771515	0.390119	0.523239	0.563059	0.631433	1.07743	0.425005	0.273897	0.461958	0.802982	0.598418	0.262827	0.213877	0.252576	0.333775	0.21367	0.213662	0.493816	0.361843	0.6166	0.834309	0.240286	0.652303	0.244619	0.571929	0.417523	0.626997	0.379038	0.130836	0.0619298	0.161559	0.233279	0.268726	0.51225
CCT5P1	0.0105987	0.0132257	0.0115544	0.0251325	0	0.147907	0.277088	0.13949	0.197596	0.0667125	0.202682	0.120871	0.136735	0.111166	0.0951472	0.190998	0.112884	0.222058	0.112012	0.143558	0.0894625	0.0491916	0.15983	0.133671	0.0993939	0.122447	0.167313	0.0794219	0.12059	0.146078	0.147355	0.102011	0.0785894	0.172759	0.170092	0.184734	0.198852	0.0461387	0.0889837	0.0849528	0.0797371	0.0332616	0.0536203	0.0832888	0.128127	0.0899906	0.123752	0.109972	0.130437
RPL3P2	0.142549	0.160094	0.279726	0.169013	0.236031	1.69995	3.9752	2.70471	4.5559	2.01884	2.66188	1.91017	0.956303	1.22602	1.38939	2.93585	1.85227	2.61329	3.1637	1.42881	2.64714	1.65403	1.25072	3.20016	0.954871	2.19583	2.89727	1.46496	3.24381	2.01829	1.76845	1.25006	2.55795	2.11702	1.90054	4.16175	1.3784	2.94762	1.82513	2.80751	1.12606	3.53413	1.49644	2.29643	1.7763	1.57345	1.89745	0.953193	4.16656
BPIFB4	0	0	0.00763686	0.00830564	0.0077327	0	0.0610468	0.0691466	0.0186572	0.209444	0.133962	0.0299584	0.0451873	0	0.152726	0.0360685	0.0596884	0.403615	0	0.0474423	0.00985501	0.0162565	0.00960356	0.132525	0.168928	0.854272	0.0345578	0.0974883	0.026568	0.140436	0.239738	0.0149831	0.197385	0.253744	0.12107	0.0381562	0.242642	0.167724	0	0.0641707	0.140539	0.450675	0.0177201	0.0688119	0.00651426	0.110461	0.687068	0.0161524	0.021553
CA11	295.809	88.536	293.445	263.623	224.647	24.7964	5.65361	16.0524	13.6028	29.4951	12.9131	16.7647	7.05826	19.6942	7.48278	5.63816	16.9091	10.9086	31.8012	7.7575	27.8688	26.6585	13.6865	25.4533	51.6283	35.9744	20.0343	10.6166	28.9617	17.1583	25.676	21.1499	20.3085	20.94	13.2835	17.5919	15.8277	89.8888	8.812	7.63683	20.9739	15.1596	75.5732	35.3464	16.0468	16.0291	9.7655	36.0443	32.4072
AL590617.1	0	0	0.0499868	0	0	0.232682	0.399579	0.100577	0.24424	0.180382	0.0773687	0.130728	0	0.216416	0.0882056	0.472169	0.146508	0.480335	0.436126	0.279478	0.161264	0.106406	0.0942895	0.0867435	0.153571	0.147147	0.158337	0.122713	0.260849	0.143628	0.0980748	0.0735534	0.101998	0.0830433	0.198114	0.1998	0.231613	0.199606	0.192481	0.0262516	0.143733	0.107922	0.0579931	0.225203	0.298472	0.0834252	0.0803067	0.158587	0.141074
SMC4	0.66713	1.05516	0.499596	0.668364	0.44543	2.63683	1.2458	7.91946	2.24125	3.15896	7.56386	2.16797	1.76581	8.10108	3.97099	5.76318	6.99529	6.70191	0.908638	6.57803	3.00386	7.30087	9.19309	4.64682	1.40991	2.34527	1.97864	1.68231	2.39174	7.10636	4.86855	3.22245	2.4779	12.189	5.39699	3.88558	3.47961	0.781216	3.93903	3.59196	1.91963	2.28454	0.674508	1.97592	5.23456	4.5699	5.11884	3.96954	2.9884
LINC02521	0.020562	0	0	0.0243791	0	0.391291	0.179188	0.248066	0	0	0.231302	0.205183	0.132636	0.107833	0.18459	0.158805	0.1095	0.107701	0	0.167106	0.0289269	0.357877	0.225511	0.337128	0.110188	0.158369	0.121723	0.0660353	0.779837	0.051527	0.285875	0.131938	0.0609869	0.03724	0.329987	0.268795	0.26708	0	0.0647373	0.235446	0.103129	0.193587	0	0.0403961	0.133847	0.224468	0.0720256	0.260763	0.0316318
PNMA5	9.50933	1.91653	11.3399	6.36158	11.4106	0.0253048	0.0869105	0.021876	0.0265617	0.0156936	0.0336562	0.00710848	0.302359	0.387033	0.140691	0.0513496	0.0584214	0.208951	0.258229	0.094559	0.00701514	0.00578598	0.0957061	0.125781	0.420871	0.659309	0.0245994	0.106762	0.09456	0.0687276	0.0639953	0.0586602	0.00739504	0.108374	0.135429	0.0108644	0.187114	0.108538	0.0627984	0.159876	0.0187576	0.0312982	1.24876	0.0783724	0.0139112	0.0967755	0	0.0632381	0.21479
C1orf115	74.5187	9.86884	75.191	48.3374	72.413	5.27162	1.5982	1.6532	2.03407	0.940884	3.46473	2.51408	2.70307	3.75752	2.15866	5.19995	3.37679	0.657945	5.20393	0.56487	0.59376	3.08993	2.10091	2.48409	7.51222	3.76024	2.32005	2.77008	4.84024	0.214049	1.94523	2.52549	0.916519	1.68349	1.99728	2.44668	2.13195	3.41219	1.04407	0.983825	2.23026	0.441513	12.1951	3.68195	1.2522	2.88881	2.69869	4.73844	1.53818
AC083864.2	0.0355782	0.0443967	0.116359	0.042183	0.196366	0.541638	0	0	0.0947571	0.223944	9.16503	0.304308	2.01959	1.19413	1.73386	0.549558	0.303148	0.372708	2.78244	1.87942	0.25026	0.990771	1.07305	0.538458	1.76358	1.18744	0.0702053	0.0380867	0.539738	0.0445783	0.190249	0.114145	0.0527625	0.773233	0.307447	1.20149	2.20794	1.70369	0.373381	4.64425	0.490719	0.167481	0.764979	0.0698969	1.42265	2.02828	0.166167	0.0820354	1.03991
AL645939.3	0.127027	0.158513	0.138482	0.150609	0.280439	0.80577	1.10698	0.975224	2.02991	0.19989	0.714466	1.08649	1.80267	0	0.162908	0.327021	0.405881	0.665353	0.134248	2.58086	0.536112	0.294785	0.174145	0.160208	1.36143	0.652244	0.12533	1.22385	0.481766	1.43245	0.135852	0.40754	0.376763	0.690182	0.784072	0	0	0.829472	0.933176	0.145454	1.59277	0.199323	0.963974	0.998232	1.18125	1.38671	0.741598	0.146448	0
FIBIN	10.76	10.1365	9.73338	7.05018	9.95321	37.9099	13.6488	73.475	31.3677	30.5916	86.5588	59.8159	36.5303	49.5884	48.5131	40.4802	69.581	42.8257	33.4602	34.3502	30.7476	58.6364	50.8039	47.5192	59.8064	97.6511	31.2897	15.5823	51.2454	11.5527	67.0195	41.9874	36.835	21.5869	43.9456	46.4911	23.4979	26.8294	69.0069	97.5327	31.0332	38.9467	20.9955	64.5644	72.7815	35.1293	68.7172	28.4724	18.2543
AC012354.2	0	0.0464191	0.0405532	0.0441046	0	0.943852	2.43128	1.22394	2.27869	0.995116	0.669521	1.06057	0.431916	0.507214	0.715594	2.2026	0.673534	0.779372	0.668328	0.755783	1.20364	0.517952	0.356978	0.656817	0.946876	0.764017	0.770736	0.517682	1.26973	1.07201	0.716095	0.835414	0.82749	0.606342	0.551061	1.37779	0.75161	0.971616	1.48348	0.851897	0.93286	0.933921	1.03507	1.09621	0.69184	1.0829	0.694946	0.471748	0.743929
FCF1P6	0	0	0	0	0	0.475337	0.376746	0.442538	0.153522	0.0453533	0	0.0821716	0	0.0906886	0.0739247	0.296792	0.214878	0	0.0609192	0.0780764	0	0.066884	0.118535	0.0363496	0.0386121	0.036997	0.113744	0.0308535	0.218616	0.577795	0.431529	0.184934	0.128226	0.208795	0.142319	0.439559	0	0	0.090741	0.132008	0.216831	0.135674	0	0.0566224	0.107206	0.279673	0.168262	0.29905	0.0443376
AC103923.1	0.377048	0.121982	0.30448	0.1159	0.18498	0.531493	0.486784	1.37843	1.63649	1.67009	0.89541	0.85601	2.16192	1.59653	1.14619	1.94135	1.27912	0.731455	1.01834	1.26731	0.491145	2.49535	1.30183	1.23287	1.04768	0.950082	0.606236	0.538177	0.635554	1.45228	1.50842	2.31482	0.931937	3.035	1.56878	1.46043	1.51157	1.76297	2.52075	0.703578	0.980567	1.33667	0.211949	1.0974	0.831109	2.48998	1.38597	0.837189	0.880795
MYD88	1.66371	1.80786	3.04163	3.14489	1.92191	17.5126	18.02	14.8379	15.7434	9.27468	11.4805	12.698	16.572	12.0842	14.8749	10.1377	18.2646	11.6866	4.139	16.4848	8.95088	13.7874	10.968	15.0729	18.7526	14.1328	12.2877	26.3977	11.9512	11.01	13.5125	14.7717	15.1862	14.0147	11.6225	9.92369	12.2848	12.1551	9.62786	7.45773	11.1043	10.3884	9.29236	9.24816	25.9852	12.4575	22.3121	12.7624	7.36072
CBLN2	5.92064	1.6146	6.38432	3.71527	7.11427	0.377313	0	0.0807061	0.089827	0.554854	0.0206944	0.078675	0.0988901	0.263705	0.0275251	0.0473604	0.215531	0.192718	0.865183	0.361311	0.0431344	0.0426919	0.172339	0.293891	0.521674	0.763556	0.0181507	0.022976	0.500027	0	0.0426283	0.180344	0	0.249887	0.117337	0.0367413	0.588535	1.05445	0.0160888	0.291401	0.0422898	0.0721669	1.46975	0.265041	0.00855368	0.252896	0.0465404	0.487812	0.457527
TRAV36DV7	0	0	0.157543	0	0	0.550006	0.209891	1.16229	0.898063	1.13702	0.541871	1.64805	0.186436	1.01048	1.42087	0	0.461747	0	0.0509086	0.391479	2.16854	0.335359	0.132076	0.121506	0.645343	0.803854	0.0950533	0.257834	0.730768	0.120712	0.360618	0.30909	0.0714369	1.30863	1.01092	0.997034	0.278084	0	0.101107	0.496421	0.422801	0.453516	0.121851	0.189272	2.28453	0.759575	0.787427	0.222141	0.741036
HPSE	0.733751	0.525802	0.372238	0.79675	0.621499	1.78802	5.77701	0.597581	2.40893	2.65794	5.0055	1.54309	3.34597	0.83437	1.9845	3.53482	2.06208	1.33183	0.495219	4.06399	0.444584	1.10427	1.40928	3.23436	5.31409	3.82818	0.763366	7.1588	2.53486	1.0468	1.23924	5.39963	2.95202	0.749976	1.01343	4.16678	1.98163	1.11481	7.68902	1.04815	0.765179	1.57314	3.41352	1.01335	2.20913	1.89898	1.87041	2.20278	1.95579
RPS2P32	0.80745	0.839655	0.607799	0.387497	0.53054	4.78042	5.61247	1.79223	7.83403	5.74797	3.84947	2.27469	6.10138	2.8835	3.45175	2.07871	1.94523	2.61815	0.568898	5.20801	3.35371	3.413	2.08212	0.824387	2.36954	4.14599	2.88314	1.7905	1.677	2.86651	3.45417	1.66534	1.19745	2.78549	2.51571	2.576	1.49829	1.25537	5.7905	0.59437	1.30172	3.04683	1.53188	1.62409	5.98903	0.326468	1.43664	1.79531	2.54345
SUMO2P8	0	0	0	0	0.0661876	0	1.30632	0.263047	0.958173	0.188708	0.202349	0	0	0.251561	0.230691	0.308726	0.0638624	0.62813	0.253475	0.0812159	0	0.139147	0.246603	0.151245	0.0803294	0.0769693	0.059159	0.192564	0.454814	0.0751285	0	0.256494	0.177843	0.108595	0.222062	0.130638	0.173073	0.391534	0.125853	0.0686581	0.0751833	0.0940861	0	0.353395	0.111517	0.0727296	0.070011	0.138256	0.184482
AC025048.6	0.428717	0.133745	0.272636	0.254153	0.197184	0.679869	2.49071	1.41059	2.66425	1.79901	9.04246	0.814869	0.691365	0.749441	0.824722	1.01172	1.71231	0.748522	0.604116	1.45173	1.50782	1.61671	0.930585	0.85611	0.33504	0.687913	8.17775	1.10912	2.30344	1.56674	0.68775	1.41366	0.635788	1.4235	1.67595	1.63461	0.979666	1.01092	1.23729	0.654541	0.492764	1.12119	0.451863	0.912446	4.41862	1.21337	1.46002	0.947338	1.0992
SCN2A	29.0199	4.0908	27.923	19.8022	19.385	1.36357	0.456901	1.67363	0.565905	1.09209	0.923477	1.24109	1.02884	3.60918	1.38018	0.7992	0.890528	2.24755	2.16828	1.06523	1.32766	0.470674	1.85935	2.41878	2.2976	1.70736	1.50967	0.951197	1.56984	0.508255	2.13812	0.720057	1.54689	1.24943	1.6692	1.31967	2.30987	1.69979	0.773222	0.61457	0.84944	1.76013	2.21798	0.688498	0.316911	1.0694	0.459135	1.35367	1.93362
SYN1	268.266	66.3316	263.997	268.716	253.795	10.5559	3.19003	1.86965	3.2166	5.77714	2.54282	2.38442	8.23865	22.4818	2.8236	4.03095	9.81817	7.75347	21.4839	6.6882	2.15765	2.09583	9.6192	8.66065	37.6722	26.3006	2.31463	3.07203	12.2821	4.63348	5.71518	10.9727	2.63905	12.2142	17.8054	2.08411	19.4278	27.858	1.40207	5.43377	3.47094	1.98733	89.0827	8.61943	0.954131	13.9039	1.89686	14.6816	17.1159
RPL22P3	0.180039	0.168498	0.0490683	0.0533654	0.0496841	0.513916	0.784476	0.740468	1.07889	0.283309	0.556946	0.128326	0.464539	0.519297	0.51951	0.347621	0.191755	0.47151	0.808659	0.426756	0.379922	0.417805	0.555343	0.283833	0.301499	0.577775	0.71053	0.337282	0.341409	1.18431	0.240682	0.144404	0.467246	0.32607	0.444513	0.539354	0.389755	0.0979691	0.330653	0.515386	0.169311	0.56501	0.626204	0.530556	0.54412	0.10919	0.420433	0.259456	0.62317
KCNJ9	50.8046	31.3958	50.7501	32.2439	48.2275	1.65386	0.752589	0.644971	0.690023	0.582414	1.30454	0.896942	2.11157	3.65339	1.93029	0.836373	1.04244	6.07434	15.7374	2.32834	0.381835	1.05932	2.19873	3.81732	3.8676	3.32046	0.413858	6.17209	1.35692	0.340078	0.77846	1.82074	0.51229	1.02782	2.01038	1.19166	19.9361	1.26211	3.8756	1.71876	1.1963	0.109699	6.22075	3.42559	0.998116	1.25203	0.53299	1.81111	4.61191
LOX	0.451612	0.313083	0.547039	0.528013	0.515823	1.16179	35.5842	10.7798	9.4971	6.38604	8.91502	3.13847	6.20661	1.9605	6.79325	21.3473	1.9741	6.66935	0.73581	31.3116	13.0773	5.2365	13.6508	1.92627	0.659647	1.71098	17.1051	67.4183	5.76877	10.4998	14.4057	3.49145	91.5963	34.1538	10.101	5.08371	4.04193	3.03088	9.87068	0.797228	5.8121	9.02039	0.987685	19.7102	11.1436	26.1834	9.03018	44.6247	4.40968
FAM133DP	0.0496344	0.0309685	0.0541101	0.0294243	0	0.188907	0.21627	0.653241	0.528775	0.468629	0.697923	0.212267	0.160085	0.208238	0.413753	0.383339	0.422915	0.259979	0.262279	0.235303	0.174566	0.345551	0.340225	0.281697	0.332477	0.509713	0.48971	0.185969	0.188244	0.373142	0.42466	0.318483	0.441647	0.314627	0.398277	0.513667	0.214901	0.162053	1.11993	0.284171	0.217825	2.18073	0.251107	0.390047	0.323092	0.331125	0.231816	0.314726	0.267245
BTF3P8	0	0.0406829	0.0355419	0.0386544	0	0.124082	0.142056	0.178782	0.520984	0.102605	0.110022	0.139426	0	0.13678	0.125433	0.167862	0.208342	0.170765	0.172276	0.0883184	0.229326	0.0756577	0.223475	0.123354	0.174709	0	0.128665	0.0698015	0.247294	0.122548	0.104601	0.139462	0.0966978	0	0.201235	0.355157	0.0941044	0.141925	0.273718	0.111994	0.122637	0.204628	0.206173	0.06405	0.212221	0.07909	0.0761336	0.11276	0.300923
RPL34P34	0.145328	0.0604498	0.211243	0.287178	0.320842	0.245828	3.16616	1.06259	3.35451	1.60082	0.926384	0.690567	0.312482	0.508095	1.55315	2.74365	0.51595	0.761209	1.79187	0.787381	0.681499	0.730717	0.796933	1.03863	0.973483	1.9899	1.57724	0.466724	2.57214	0.424879	0.466271	0.673478	1.65233	0.52641	1.07644	2.69137	0.489396	0.948972	1.11845	1.38674	0.425189	1.90033	0.735234	0.951704	0.360382	0.763867	0.22625	0.781886	1.56497
PHACTR3	16.2343	31.8162	17.051	17.8169	16.6655	0.638931	1.14013	0.52767	3.3421	1.45663	1.6363	1.85301	5.80407	6.61623	3.27634	0.543246	0.623305	11.097	7.81733	3.01446	0.166243	0.440727	2.06359	13.2465	7.88548	9.15924	1.02711	2.98183	0.928358	0.102234	0.418254	1.67596	0.521565	0.800023	5.77267	1.62139	4.34486	5.83624	14.4743	13.6084	2.20845	0.128031	7.7541	6.99233	1.09627	4.80856	0.0788442	0.966632	10.2148
AL161937.2	0.080586	0	0.0351411	0	0.017791	0.0204472	0.21068	0.0353532	0.386331	0.405792	0.398866	0.0459512	0.665374	0.185951	0.248037	0.124477	0.0514981	0.253259	0.0681334	0.436611	0.0680218	0.0374022	0.24305	0.101636	0.367069	0.144824	0.190821	0.24155	0.183379	0.403886	0.0344737	0.0172362	0.0478036	0.20433	0.119379	0.0526728	0.162825	0.771783	0.0845722	0.184551	0.141463	0.328771	0.163078	0.0949915	0.374692	0.195495	0.169369	0.055744	0.198352
IQGAP3	0.569758	0.0793504	0.241244	0.322686	0.148809	2.7106	1.23021	3.40338	0.670664	0.788502	4.39203	2.26258	1.45369	11.7518	3.01737	2.3377	2.71179	9.11283	0.182794	4.06881	1.5852	2.53521	6.7718	3.72444	1.65951	1.86437	1.65882	0.776027	1.88112	4.42356	4.65709	2.53519	0.697839	6.46777	3.17769	1.06956	1.99699	0.293428	2.6854	2.42322	1.62656	0.766309	0.659497	1.11435	3.28068	4.46125	3.65002	2.10256	1.58473
TMEM183B	0.258447	0.645012	0.430914	0.25235	0.201379	1.25366	1.85478	1.50063	2.14598	1.91384	1.55624	1.56039	0.823754	1.14808	0.682394	1.36983	1.6354	1.67223	0.867613	2.07979	2.78037	1.09368	1.18798	1.41886	0.855422	2.40038	1.18496	0.764908	2.65227	1.80961	0.943014	1.21937	0.879282	1.21149	1.67032	4.15691	1.14093	1.22435	1.97839	1.04448	0.953122	1.88456	1.13446	0.955754	1.08858	1.29082	1.08281	0.701083	1.94115
TRIP10	1.35657	1.56383	1.35213	2.80832	1.69236	8.24994	7.16814	10.4005	6.49193	8.21348	6.35592	12.7264	6.92268	8.41963	7.79848	8.47035	10.1231	5.50395	4.78347	6.91815	9.85116	12.8173	7.40946	6.19186	6.61763	3.22293	8.56597	7.11353	10.6492	8.9681	11.6525	13.4574	18.2083	10.8103	8.2617	8.49149	4.53098	4.44315	7.03698	5.9175	12.2524	6.72377	6.40551	10.7281	7.14447	7.42807	13.0638	9.36891	5.06815
CDCA7L	0.959721	2.24813	0.40382	0.738627	0.929291	16.5972	2.53106	27.2977	6.50228	7.7233	20.5596	5.70648	8.22715	13.8586	6.97997	6.05759	27.7287	10.1199	1.11659	9.59555	5.69076	10.1639	10.5949	6.56167	5.28395	7.79162	5.91393	2.97402	6.19413	12.5313	10.9122	5.04624	3.38962	22.4818	16.197	5.51634	5.6072	3.93052	9.85548	5.3308	4.85573	4.45835	3.0346	3.08456	40.0004	7.13779	20.3426	6.68724	6.66969
RN7SL546P	0	0	0	0.0701111	0	0.07502	0.25766	0	0	0.0930524	0	0.674374	0.0762886	0.372136	0	0	0.125963	3.7168	0.0624947	0	0.249569	0.137228	0.162135	0	0.158443	0.379539	0.233372	0	0.448541	0.222277	0.0632414	0.063239	0	0.749681	0	0	0.085343	0	0	0	0.148293	0.0927883	0	0.348521	0.384925	0.143453	0	0.0681743	0.454843
CELF3	37.0982	7.30823	39.7486	52.4863	34.0683	1.41641	0.437656	0.338957	0.52474	0.899709	0.356348	0.53419	5.70661	28.0962	3.44331	0.606672	3.02834	5.90859	4.48698	11.2502	0.940219	2.31747	7.47284	7.50818	5.39808	11.8323	0.285867	0.715454	2.16843	1.02134	2.22691	2.18552	0.761972	1.17544	13.878	1.72125	6.22221	3.80914	2.28661	1.02184	2.62059	0.236413	7.94969	1.82151	0.969963	3.63157	0.757803	2.06658	17.5496
AL050331.1	0.055052	0.171743	0.0900243	0.130544	0.091154	0.838104	0.959503	0.875487	1.61285	0.822984	0.712173	0.863264	0.284092	0.808385	0.494215	0.850359	1.23132	0.288355	0.552722	0.671106	2.36216	0.702658	0.679248	0.659603	0.33189	1.06003	0.516003	0.353601	1.04395	0.758762	0.794831	0.765365	0.285747	1.29617	0.883497	1.46931	0.63562	1.19827	0.635527	0.945565	0.586744	0.907032	0.62666	0.703008	0.511939	0.767922	0.771357	0.634688	1.82083
RPL22L1	1.82104	2.9624	1.99328	3.16434	2.51473	4.8076	21.0736	7.07519	42.7276	26.5907	5.99617	45.3713	5.32643	7.52405	5.75816	29.8937	10.0432	6.52624	5.36848	7.94896	9.68736	7.45961	6.41812	11.1023	7.17079	18.7008	9.1435	7.38732	10.6813	5.12689	6.70206	10.3681	7.20524	15.2487	3.63147	75.2311	14.7582	37.6472	9.64068	28.99	16.9727	9.83333	19.3209	6.77862	4.60034	12.1978	9.57254	26.6639	6.45345
SLA2	0.0559805	0.0620942	0.0542475	0.0589981	0.116723	0.252516	0.704662	0.0409312	0.34789	0.313212	0.0979573	0.195072	0.4574	0.156575	0.63816	0.240195	0.112622	0.260639	0.111752	0.497075	0.201261	0.267039	0.119381	0.305946	0.416652	0.183643	0.147286	1.18523	0.731298	0.187045	0.119739	0.299336	0.304403	0.0337957	0.0537503	0.169399	0.0987465	0.690474	0.561385	0.121079	0.343165	0.195202	0.196676	0.122199	0.225582	0.0829914	0.268718	0.150592	0.153099
UBE2NL	0.0578859	0.0180584	0	0	0.0159744	0.110156	0.252224	0.174588	0.539596	0.29604	0.0976739	0.0825184	0.0560093	0.0910713	0.259828	0.260789	0.107892	0.151599	0.107059	0.0980073	0.0610761	0.235082	0.0595178	0.182515	0.038775	0.130036	0.128502	0.0774591	0.109769	0.0725292	0.0154768	0.0619049	0.128767	0.104838	0.107189	0.409884	0.0835425	0.0944968	0.16706	0.0994239	0.072582	0.181662	0.0366066	0.085292	0.134573	0.0175533	0.135177	0.050052	0.133574
IGLV10-54	0	0	0	0	0	0	0.818863	0	3.62881	0.665388	0	0.0669755	2.66697	0	0	0	0.0500401	0.246089	0	0	0.198288	0.054515	0	0.23702	0.062943	0.241241	0.231774	0.804726	0	0.412075	0	0.0502447	0	0	0	0.153545	0.0678067	193.892	0.542374	0.0537979	1.6495	0.147445	0.178269	0	0.174761	0.0569882	0	0	0
TRIM54	1.12298	0.301943	1.33246	1.24318	1.2533	0.220391	0.243304	0.0476321	0.0660969	0.12692	0.0348962	0.097289	0.0640339	0.527103	0.238704	0.0159724	0.231282	0.129989	0.406532	0.0840367	0.10474	0.0287959	0.21264	0.125198	0.282606	0.222999	0.293826	0.0398505	0.211775	0.0544165	0.0597178	0.099526	0.294432	0.258444	0.045955	0.00675878	0.447711	0.351115	0.0520896	0.0710428	0.163369	0.0389415	1.0829	0.499748	0.282706	0.331125	0.0144885	0.343338	0.0190889
MIR708	0	0	0	0	0.21511	0.247225	0.849106	0	0	0.91995	0	0.555592	1.25703	1.43075	0.749747	0	0	4.08285	1.02974	0.791855	0	0.452227	0.267154	0.73732	0.26107	0.500301	0.576801	0.625834	0	0.488335	0.208409	1.04201	0.577989	2.11761	0	0	0	0.424162	0	0	0.733037	0	0.246471	0	0.181215	1.41823	0	0.673996	0.599565
MS4A4E	0	0.0412052	0.0599969	0	0.0242999	0.167567	2.49391	0.108646	0.938083	0.190525	0.297159	0.251051	0.937204	0.230893	1.18574	0.368371	0.386864	1.15305	0.221018	0.939247	0.123877	0.715204	0.784657	0.263757	0.516108	0.3391	1.39005	4.51286	1.04362	0.11033	0.294287	0.435529	0.277494	0.059804	0.149467	0.0719433	0.873697	0.263536	0.577566	0.100828	1.20071	0.293611	0.167056	0.47573	0.153532	0.280369	0.629739	0.304553	0.0338651
HOXA1	0.00675411	0.00842821	0	0.00800796	0	0.239922	0.52973	0.629645	2.5184	0.807749	1.68669	1.18427	0.174271	1.19722	0.796896	0.347757	0.107905	0.424526	0.0356902	0.704425	0.180534	0.28213	0.175928	0.553692	1.14916	1.17912	1.48604	0.318134	0.691625	0.431597	0.195029	0.642851	0.610998	0.0611623	0.892156	0.235447	0.107225	0.426334	2.60846	0.0928061	1.26186	1.43074	1.15324	0.132691	0.810221	1.75319	0.141952	1.1135	0.114293
AL513283.1	0.0422903	0	0	0	0.0700234	0.0804777	0.552809	0.0463819	0.0563168	0.199644	0.0713585	0.150716	0.0818386	0.177426	0.406768	0.163309	0.0900846	0.110755	0.53633	0.315049	0.148736	0.171746	0.0579766	0.266684	0	0.08143	0.458975	0.022636	0	0.158965	0.0226141	0.226132	0.156791	0.0765924	0	0	0.396724	0.782424	0.0443822	0.169487	0.106054	0.132718	0	0.0830834	0.0393265	0.0256482	0.0740683	0.0975119	0.0975865
AKAP5	10.5102	1.16511	14.7156	6.62854	9.23803	0.666112	0.318302	0.393083	0.1824	0.815447	0.680512	0.227799	0.24739	1.34085	0.322043	0.282095	0.632163	0.789177	0.646578	0.655522	0.301884	0.307264	1.27687	0.86374	0.599433	1.44762	0.173429	0.444771	0.346317	0.546322	0.480961	0.554183	0.132033	1.45534	0.712992	0.283502	0.517261	0.809928	0.325824	0.26924	0.291966	0.17194	0.762248	0.296001	0.621998	0.897154	0.266549	0.529004	0.582964
LINC01812	0	0	0	0	0	0.030008	0	0.103768	0	0.0744419	0.159646	0	0.0305154	0.5458	0.0303346	0.121787	0.0503852	0	0	0.0320382	0.199656	0.247009	0.0648539	0	0.0316886	0	0.0933489	0	0.538249	0.148184	0	0	0.17539	0.471228	0	0.231905	0.0341372	0	0	0.108338	0	0.371153	0.0897493	0.0464694	0.0659872	0.0860718	0.0276181	0.245427	0
CD248	1.38101	1.19628	1.22782	1.67713	1.52444	23.2527	27.0492	31.5352	13.3198	4.16699	20.6028	19.6773	8.83045	14.4357	15.063	18.9156	14.9302	13.9755	2.19636	12.4947	5.44181	10.8591	11.5526	20.3513	1.89506	8.67449	52.2996	17.6617	19.9336	6.40067	21.7599	23.6518	13.3521	1.20202	23.1313	8.85863	34.7344	5.95352	3.03233	13.2878	12.3904	5.18606	2.35718	6.42724	12.1129	12.8317	28.3674	35.8467	11.7982
AL354809.1	0.171643	2.6676	0.18712	0.943533	0.671753	0.09898	0.203971	0.0342273	0.166235	0.343761	0.157976	0.177951	0	0.278227	0.14008	0.0401709	0.166193	0.490388	0.230872	0.126812	0.0219518	0.344005	0.192526	0.196797	0.355379	0.400605	0.0615814	0.250561	0.0591796	0.0586536	0.133503	0.266997	0.0231406	0	0.13484	0.186983	0.1126	0.101891	0.065503	0.142939	0.0782618	0.0979385	0.138149	0.429176	0.0580415	0.113561	0.0728776	0.251854	0.456084
AC025271.1	0.0399737	0	0	0	0	0.101426	1.74175	0.175365	0.85171	0.314513	0.0449664	0.170952	0.103141	0.167707	0.102529	1.85236	0.127725	0.209377	0.0422459	0.162432	0.224942	0.278294	0.0548008	0.20166	0.214212	0	0	0.0855842	0.758023	0.3506	0.0855011	0.085498	0.237124	0.289587	0	0.0870922	0.288455	0.0870076	0.209755	0.366177	0.0501222	0.250896	0.25279	0	0.148689	0.145459	0.0933479	0.0921703	0.30747
AC008105.1	3.3729	0.354632	2.82097	0.993113	1.50248	0.0759033	0.29328	0.131237	0.139429	0.164759	0.235559	0.170579	0.434176	0.721659	0.345283	0.17328	0.159308	0.548416	0.276634	0.607791	0.0105212	0.269009	0.143538	0.132051	0.28054	0.326406	0.29515	0.416313	0.283639	0.103077	0.159965	0.639837	0.0887275	0.243806	0.212346	0.0325884	0.280631	0.244175	0.196216	0.154144	0.421984	0.140821	0.359441	0.22039	0.139092	0.244927	0.130984	0.215553	0.598258
AC104849.1	0	0	0	0.050203	0.0467399	0.322308	0.737988	0.510831	1.46605	0.732931	0.762097	0.241443	0.546264	0.310879	0.434422	0.545035	0.315685	0.665353	0.850237	0.745582	0.536112	0.245654	0.290241	0.747636	0.510538	0.271768	0.167106	0.498607	1.12412	0.42443	0.316988	0.633952	0.439557	0.99693	0.522714	0.645772	0.427768	0.737308	0.311059	0.484845	0.690202	0.398646	0.267771	0.499116	0.905627	0.770395	0.197759	0.341713	1.04221
FAM19A2	8.73463	0.596542	8.93645	3.8841	7.54323	0.456037	0.129178	0.0589334	0.157918	1.09632	0.156326	0.105656	0.855784	0.316781	0.225748	0.114484	0.282209	0.291159	0.569847	0.484382	0.19811	0.300996	0.195595	0.275755	0.637965	0.846754	0.268737	0.202323	0.393533	0.14162	0.126824	0.176359	0.0879318	0.255043	0.240177	0.220017	0.446587	1.38738	0.103062	0.140031	0.11152	0.441935	0.717122	0.203853	0.0827068	0.247226	0.0605778	0.363154	0.809527
TAC3	12.3876	1.60426	12.3763	9.71399	13.8304	0.691099	0.142417	0.203135	1.21872	1.13153	6.18917	0.186374	7.33708	8.73046	0.824373	0.196337	3.95695	0.1712	1.49686	0.959214	0.0919633	0.0632083	0.477957	0.480928	3.44467	14.0834	0.354729	0.653137	0.867729	0.600646	0.396162	0.652479	0.0161573	0.710353	1.72157	0.249242	0.455994	2.44257	9.99323	0.299409	0.450813	0.290627	3.67921	0.920384	8.49016	12.7791	0.915925	0.489867	6.90529
RPL36AP40	0	0	0	0	0	0.13555	0.232777	0.0585915	0.284567	0.168132	0.120191	0.076156	0	0.168099	0.137025	0.137532	0.113798	0.279821	0.112919	0.0723605	0.150312	0.123975	0	0.0673771	0	0.137154	0.105417	0.114379	0.202612	0	0	0.0571318	0.079226	0.193509	0.1319	0	0.0771011	0	0.112131	0.061172	0	0.167655	0.135136	0.104954	0	0.129599	0	0.123181	0.410917
RPL12P15	0.0343661	0.0857684	0.07493	0.0407459	0.0379352	0.174395	0.299484	0.226147	0.274587	0.162236	0.309268	0.0979802	0.0443361	0.288362	0.440733	0.35389	0.0366025	0.540016	0.145278	0.0465486	0.0966936	0.319006	0.188453	0.520113	0.138121	0.264688	0.169534	0.183946	0.782025	0.172239	0.147014	0.110256	0.30579	0.248964	0.212124	0.262062	0.0991962	0.299208	0.18033	0.314809	0.129273	0.323551	0.347726	0.405094	0.191746	0.208424	0.12038	0.198102	0.42294
RPS3P7	0	0	0.0257507	0	0	0.149833	0.102922	0.155437	0.0629104	0.408867	0.0265711	0	0.0609468	0	0.121171	0.182429	0.0754737	1.23723	0.0998538	0.127976	0.232611	0.164446	0.0323823	0.148953	0.0949347	0.303212	0.0932203	0	0.179169	0.177576	0.101047	0	0.175148	0.299459	0.0583194	0.180122	0.170451	0.154241	0.0247892	0.135236	0.177706	0.222385	0.0597504	0.232027	0.0878618	0.0573021	0.0551601	0.0544643	0.0726746
BLM	1.11777	0.48345	0.776225	0.81006	0.846647	7.82093	1.47139	8.59001	2.69813	2.07198	5.88052	4.50037	1.78989	8.08311	3.03821	6.22692	7.30753	5.44338	0.467542	2.08486	4.80586	17.7232	8.49085	2.69071	2.4654	2.16738	2.35287	1.47681	2.59121	2.74529	7.09132	3.10461	3.2066	3.87813	3.31235	2.95147	2.82592	0.598268	10.8103	2.64974	7.86114	2.30023	2.90693	2.87995	2.69961	2.64176	5.01266	6.28637	1.69939
EEF1A1P11	0.333344	0.508405	0.41724	0.365951	0.354335	7.78447	21.6256	6.13389	18.381	18.5924	6.41631	7.86709	4.33236	12.1076	7.42586	21.5813	8.78386	7.63072	7.50252	8.74594	16.4481	8.0652	6.75328	9.38928	4.74701	10.2855	21.865	4.16322	20.1343	7.33242	7.11682	7.56546	11.1869	13.2372	8.56552	14.754	6.75309	22.7343	6.15447	13.4018	4.31906	14.5489	5.35599	22.3389	5.38452	5.10657	8.0006	4.51207	15.0992
C8orf89	0.0781856	0	0	0.0309	0.0287685	0.264508	0.113558	0.142917	0.138823	0.164044	0.263853	0.371521	0.168113	0.410028	0.534774	0	0.111031	0	0.385606	0.141202	0.0733284	0.332641	0.0357288	0.131477	0.244406	0.267638	0	0.0836982	0.197685	0	0.222979	0.139356	0.0772995	0.0944018	0.0321731	0.028391	0.0752263	0.113454	0.054702	0.179054	0.359463	0	0.164813	0.307207	0.0242354	0.0632239	0.121721	0.0600928	0.16037
FNTAP2	0	0.0337527	0	0	0.059715	0.171576	0.589285	0.237323	0.144079	0.12769	0.212988	0.115675	0.0348954	0.11348	0.0346886	0.208901	0.0864258	0.141676	0.14293	0.0732736	0.304417	0.219694	0.148325	0.102341	0.108711	0.173606	0.293556	0.144778	0.102584	0.203345	0.144637	0.0578528	0.0802256	0.0979754	0.133564	0.117863	0.078074	0.0588742	0.0851591	0.0619439	0.067831	0.0848852	0.171052	0.212557	0.0503057	0.0984259	0.126329	0.124735	0.166441
GPR179	1.59918	0.630312	1.3618	0.765378	0.902293	0.0265898	0.0091324	0.0413764	0.0390749	0.0197887	0.0872344	0.0687191	0.240651	0.270392	0.290296	0.0431658	0.037949	0.307386	0.414213	0.264016	0.026537	0.109437	0.178146	0.306631	0.151626	0.0914752	0.0641046	0.148083	0.111285	0.0761569	0.0582791	0.136727	0.0839222	0.220163	0.16818	0.0136993	0.381133	0.041058	0.512502	0.227993	0.136657	0.00328876	0.0689226	0.0576466	0.196851	0.185584	0.0538388	0.0410779	0.119298
PFN1P1	0.0810813	0.252946	0.176785	0.240333	0.223755	4.26887	10.9521	7.11409	11.6612	4.21046	6.15657	6.29934	4.02724	3.01902	3.43147	7.09705	3.58384	7.43213	2.48502	4.50278	5.13299	2.30497	2.72333	4.2438	2.33544	7.75407	9.07972	2.82094	7.534	6.19713	6.06998	4.68238	3.66743	2.93695	3.5033	10.4668	3.45205	3.52967	3.7015	3.34234	3.91415	4.58019	6.46068	3.74337	5.91883	3.09797	4.92295	3.69237	4.98929
TNFSF14	0.0287128	0.0806165	0.0156509	0.119151	0.0633894	0.100173	1.61078	0.153518	1.7015	0.355812	0.177645	0.486056	2.03271	0.158107	4.2991	1.96808	0.198778	0.902362	0.034138	1.51675	0.0302952	0.170744	0.551081	0.190117	0.60585	0.202717	2.88956	4.36853	0.381137	0.116922	0.249498	0.333931	0.990009	0.221009	0.0797528	0.0938364	0.103598	0.156242	0.222231	0.0205486	1.79112	0.377329	0.413088	1.07177	0.143515	0.113189	1.67209	0.653777	0.0496919
AL158152.2	0.510812	0.455302	0.0795534	0.25956	0.563862	0.648045	1.90778	1.28054	1.94353	2.52627	1.88801	1.87246	0.753147	2.83193	1.3102	1.5029	1.24355	3.44002	1.31106	1.77915	1.12926	1.43943	2.00081	1.28848	1.17315	1.77979	2.51992	1.17178	2.21407	2.37726	2.65345	1.56079	1.62329	1.32163	1.26119	1.98737	1.15848	0.476505	0.382914	0.250675	3.93449	0.114505	1.01525	2.43717	1.28933	1.50473	0.937253	3.78585	0.336777
RPL23AP15	0.074722	0	0	0	0	0.426584	0	0.204879	0.0995053	0.293956	0.210137	0	0.0963995	0.0391864	0.0479141	0.288548	0.0397923	0.195692	0.197423	0.0506051	0	0.0433507	0.051219	0.14136	0	0.0959182	0.0737232	0.0399952	0	0.0468121	0.0799128	0	0.0554064	0.0676649	0.184487	0.1628	0.107841	0.0813208	0.0392091	0	0.140539	0.0586244	0.0472536	0	0.243199	0.317222	0	0	0.114949
AC023794.5	0.0397513	0	0.0260014	0.0188523	0.00877592	0.0100861	0.0346413	0.0871946	0.105871	0.0375316	0.035773	0.0113334	0.0615402	0.333548	0.244702	0.0409345	0.0762085	0.541351	0.184848	0.247676	0.100661	0.461242	0.479564	0.180484	0.244973	0.11226	0.15688	0.0510648	0.180913	0.0996141	0.0595178	0.0765201	0.212224	0.0143988	0.196291	0.199198	0.321273	0.155742	0.225275	0.100138	0.189405	0.336825	0.160886	0.234286	0.0295724	0.414663	0.0464143	0.229144	0.0244607
SAMD12	6.73448	2.70375	7.25311	3.73148	4.91016	0.380261	0.131992	0.101418	0.101911	0.132969	0.42864	0.129549	0.699336	0.364548	0.374177	0.151866	0.269996	0.342388	0.433036	0.282896	0.0448588	0.418087	0.273214	0.303629	0.397285	0.476858	0.190336	0.534213	0.489783	0.0799061	0.247239	0.226769	0.1395	0.170364	0.246025	0.206682	0.363557	0.26027	0.0836601	0.142397	0.137939	0.0875606	0.421447	0.485496	0.137882	0.406112	0.113556	0.327181	0.269793
AC015849.6	0	0.045146	0	0.042895	0.039936	0.229491	0.15764	0.277753	0.867208	0.967823	0.284882	0.154722	0	0.189732	0.139194	0.372555	0.115599	0.189499	0.114706	0.245018	0.661658	0.461768	0.247991	0.273773	0.0969375	0.32509	0.107085	0.154918	0.411635	0.498638	0.309536	0.116072	0	0.327618	0.0446623	0.591179	0	0.314989	0.151873	0.289986	0.181455	0.340615	0.0915165	0.142153	0.0672866	0.0438833	0.126729	0.04171	0.389591
HMGN2P3	0.565342	0.470312	0.20544	0.446862	0.485376	7.96915	5.20038	11.2296	6.692	17.6936	6.99549	6.17868	6.80729	9.158	4.43074	8.73254	6.75725	14.8059	3.25293	12.4222	7.6882	6.34112	7.40593	6.89245	3.61865	9.1117	3.78054	2.01734	7.86178	10.7827	4.36667	4.56804	2.70152	7.05351	8.29737	13.1385	3.98892	7.51994	9.29513	7.48047	5.11963	9.56094	3.25738	3.94905	5.72453	5.56208	6.08762	3.40372	10.3398
CFAP45	0.143722	0.130433	0.142438	0.100693	0.115381	0.207198	0.142326	0.222112	0.104395	0.226162	2.7411	0.316635	2.22501	0.513902	0.251344	0.605456	0.257445	0.54749	0.0345209	2.70769	0.441144	0.8035	0.680657	0.0823925	0.25381	0.117404	0.296494	0.398627	0.346871	1.18689	0.524	0.419185	0.319711	0.366783	0.225813	0.512401	0.754269	0.838952	0.315375	0.16457	0.663504	0.0922581	0.999779	0.744396	2.2113	0.4279	0.289859	0.45943	0.211047
ADCY1	30.7206	3.65194	29.8126	17.4109	20.221	2.97635	0.336881	0.615809	0.3747	0.52654	1.43432	1.49965	0.500359	5.37869	1.36214	1.47812	2.49198	1.49372	1.92219	1.43349	0.495696	2.44129	11.9025	1.59213	1.14616	1.45616	0.619005	0.369056	1.09599	1.51503	3.58667	0.912222	0.838319	2.82347	3.21069	0.220917	2.32129	0.852462	1.05614	0.902715	0.581662	0.161094	2.0439	0.913847	2.69318	4.77355	1.76109	2.26784	3.69683
SERPINH1P1	0.0137299	0	0	0	0.0151559	0.12193	0.0598249	0.165642	0.0731352	0.108027	0.0772241	0.137008	0.123992	0.0288016	0.0352163	0.212079	0.131611	0.215747	0.0145104	0.185971	0.077262	0.111518	0.0941134	0.121214	0	0.052874	0.0812785	0.088188	0.156217	0.120422	0.102786	0.073416	0.040723	0.174065	0.169495	0.104699	0.138708	0.11954	0.0288182	0.0786078	0.103294	0.107721	0.0173654	0.0809215	0.0893742	0.0999232	0.176345	0.158291	0.0844864
RPL5P1	0.038364	0.215428	0	0.0682289	0.0635223	1.60613	6.35215	2.01964	4.13815	2.32423	1.85569	1.7774	1.08886	1.36811	1.32841	3.40738	1.0828	1.90898	2.83813	1.97462	1.61913	0.957062	1.55152	2.95148	1.07933	3.22565	1.85471	1.08833	2.90999	2.49958	1.68219	1.41545	1.84905	2.22341	2.53376	6.93756	1.52262	2.54687	1.65073	1.49358	1.03423	3.79249	1.79532	2.44952	1.19513	1.25642	1.16466	1.30477	3.03941
FN1	7.64684	2.91296	8.40224	9.28483	5.66304	94.1298	246.552	137.25	82.6307	24.7721	123.755	72.8497	28.281	31.6123	183.631	92.4491	70.104	62.9614	33.9568	136.961	25.4933	86.4663	90.9737	85.4167	20.3364	25.8476	171.267	400.804	87.568	25.8449	113.588	124.57	213.449	69.485	76.4758	55.5529	67.6047	48.1501	25.862	36.4146	48.5795	44.3374	15.8972	110.436	46.5025	83.3649	172.885	100.71	35.8073
AC092115.1	0.061158	0.152634	0.133346	0.130521	0.0540076	1.61384	1.3857	2.46837	2.1175	0.789153	2.9445	1.34261	1.13617	1.34707	1.17649	2.17275	1.5112	2.17829	1.42196	1.55735	1.44544	1.26314	1.62655	1.35754	0.917657	1.05199	1.14647	0.641606	1.53086	2.11496	1.64824	1.6351	0.997671	2.59188	2.52167	2.18526	1.35928	0.638966	2.4518	1.6667	0.674827	0.806107	0.804458	1.44181	1.78578	2.22546	1.44247	1.01532	1.84403
AL132711.1	0.0237517	0.0296388	0.0517868	0.168966	0.104873	2.19969	0.206984	2.05793	0.506071	1.56978	0	0.5756	0.0306422	0.523155	1.15751	0.550319	1.11308	0.248816	0.0502035	0	0.534627	2.09452	0.618672	0	0.477303	0.0914677	1.8513	0.406821	1.44129	0.446401	0.45723	0.127004	1.51462	2.2799	0.117285	0.0258743	0.445627	0.0516984	0.348971	0.054394	0.804107	2.12436	0.270367	1.72651	0.0662614	0.316908	0.859719	0.931023	0
AL158201.1	0.0137409	0.102881	0.10486	0.0651673	0.197184	0.488111	2.33504	1.91394	3.03754	2.3785	3.7561	1.42994	0.514092	0.461194	1.02209	2.29936	0.804932	1.36749	0.566358	1.95426	3.03496	0.57398	1.71424	0.918499	0.31295	0.705552	1.69466	1.16207	2.76205	4.92405	0.690689	0.837613	1.48758	3.45921	1.54364	1.931	1.28903	2.27307	0.721032	1.03845	0.413508	1.29368	0.556139	0.944841	1.95503	1.80006	0.946606	1.29903	2.79028
VEGFA	2.65471	2.99094	2.93814	5.97244	2.79006	15.035	16.5225	44.1635	13.1755	27.8117	56.8197	35.1996	12.6325	41.9134	39.401	84.3676	7.7825	70.2597	4.43071	67.5505	60.0243	35.4871	115.894	36.96	2.20492	7.13893	46.6772	27.2689	52.7572	55.1098	109.317	41.1418	79.2429	155.196	77.2612	24.728	23.4906	7.5656	3.05665	14.0832	15.6288	14.4006	2.81357	26.6842	31.37	55.4978	50.5428	74.1255	36.2159
DBH	1.26568	0.131616	1.54214	1.38294	1.2807	0.275489	0.135169	0.190528	0.0660969	0.0585786	0.0628131	0.150356	0.0480254	0.377432	0.230747	0.111807	0.330402	0.129989	0.0852406	0.050422	0	0.338352	0.119079	0.226922	0.290918	0.65307	0.189763	0.132835	0.258836	0.0855117	0.318495	0.165877	0.230025	0.303391	0.0689325	0.0270351	0.143267	0.202566	0.0716232	0.134981	0.295619	0.00973539	0.306037	0.219401	0.0750036	1.07616	0.297015	0.665217	0.133622
SLC22A15	3.94368	13.6232	3.12644	4.27622	3.2229	0.324775	1.41197	0.270106	1.30322	0.841375	2.09601	0.314122	0.480768	0.350079	0.731424	0.91766	0.234693	1.68036	0.462334	1.50989	0.104852	0.879843	1.0884	0.976777	0.820507	0.869381	0.594676	1.93569	0.589917	0.678059	0.942645	1.76393	0.528622	0.269969	0.352032	1.20729	0.818434	1.60111	2.04387	0.363634	0.796386	1.74916	1.6722	2.16453	0.370648	3.85198	0.177832	1.05353	1.27119
ZMAT4	5.37552	0.666732	4.48256	2.95261	5.28758	4.17315	0.0202442	0.62676	0.0494965	1.03086	1.46339	0.278172	0.293704	0.618883	0.119169	0.107648	4.34967	0.243356	0.608862	0.226551	0.385635	0.560658	0.121019	0.152351	0.541521	0.518871	0.0412558	0.119368	0.933902	0.0116428	0.626074	0.193778	0.0895719	2.23828	0.72268	1.46778	0.509607	1.49669	1.74557	0.0478802	0.116513	0.597807	0.84031	0.200809	0.0129615	0.197243	2.97282	1.11414	0.357368
PCDHB16	0.857263	1.365	0.474759	0.626107	0.681331	3.45413	1.13554	2.7454	1.80829	0.81479	3.70305	0.826112	6.89236	3.32326	8.15762	3.8754	1.73479	3.08928	4.10233	2.61492	0.612654	3.29843	2.39749	1.3104	3.98293	1.69908	1.33976	1.48301	4.94193	0.335126	1.09651	10.2093	6.87531	14.2777	2.40019	4.53491	4.35008	0.850868	1.92889	3.85186	6.08827	1.59805	1.50494	8.67016	3.80098	4.84559	1.5655	1.3125	0.780718
AC026700.1	0	0	0.0343659	0	0.0347971	0.439915	0.137355	0.484026	0.587703	0.0496051	0.638292	0.314563	0.244011	0.297572	0.282993	1.13616	0.302173	0.165115	0.366467	0.256188	0.088695	0.292617	0.21608	0.15903	0.042232	0.364189	0.715346	0.236222	0.836891	0.434475	0.202279	0.16856	0.280495	0.399646	0.350238	0.343406	0.363963	0.205843	0.562405	0.144384	0.513845	0.197857	0.159481	0.185792	0.527655	0.344129	0.368072	0.2544	0.145483
AF201337.1	0.137556	0.20026	0.22494	0.271821	0.0759211	1.39609	2.49737	4.80255	3.54148	1.58736	1.96001	1.92823	0.443657	1.08208	0.970261	1.88868	1.39183	0.600419	0.993399	1.18002	1.48363	1.6759	1.94865	1.64813	0.245713	0.470871	2.62388	2.40517	3.04324	1.78099	2.03505	1.47107	2.00596	1.95152	1.92454	2.44755	1.42276	1.24754	0.842104	1.02381	0.661171	0.863378	0.347959	1.48634	1.3218	1.02891	2.43597	1.45372	1.30494
AC083805.2	0.0281126	0.105242	0.0612952	0.0999945	0	0.285322	0.367482	1.04831	0.149747	0.44238	0.347863	0.280529	0.145073	18.4584	0.180267	0.361867	0.239536	1.4725	0.237685	0.495017	0.118648	0.489295	6.47476	2.411	3.31431	2.05697	0.110947	0.180568	0.319861	0.457915	0.330721	0.0601289	0.0833821	0.0509151	5.51806	0.581876	0.202864	0.428334	0.177019	0.160953	0.10575	0.0441125	0.106669	0.27615	0.182997	0.136398	0.262599	0.291697	7.91426
H3F3AP5	0	0.149645	0	0.0473944	0.0441251	0.507128	0.696702	0.263047	0.532319	0.566123	0.449664	0.113968	0.154711	0.377341	0.410118	0.823269	0.510899	0.62813	0.126738	0.920446	0.337413	0.41744	0.274004	0.40332	0.160659	0.71838	0.394394	0.171168	0.606418	0.550943	0.342005	0.299243	0.533529	0.289587	0.394777	0.78383	0.173073	0.261023	0.41951	0.320405	0.400978	0.564516	0.25279	0.70679	0.260206	0.339405	0.326718	0.184341	0.553445
MSANTD1	0.651619	0.212491	0.638597	0.831809	0.879691	0.0748909	0.0890364	0.0473123	0.024188	0.150057	0.122593	0.113281	0.070299	0.283384	0.136853	0.116901	0.0604549	0.107031	0.182363	0.0799578	0.0383292	0.115916	0.152518	0.128858	0.130794	0.075777	0.0515223	0.0947907	0.120553	0.0768096	0.208823	0.208815	0.0808098	0.0945768	0.0476485	0.0222602	0.0950264	0.153199	0.0262103	0.0675946	0.128109	0.0748154	0.28142	0.147197	0.120346	0.393817	0.10339	0.109938	0.0349277
RBM8B	0.130657	0.244562	0.284877	0.077456	0.180282	1.53327	2.56187	3.97652	3.47984	1.28501	2.20464	1.62974	1.85418	2.02135	2.13642	2.8591	2.29613	2.56636	1.96769	1.59276	1.88405	1.25073	1.20906	1.77144	1.48785	1.50948	2.38484	1.22385	3.71648	2.45563	2.4104	1.95619	1.64699	2.66213	2.50007	3.73625	2.07424	0.853171	1.43976	1.68311	0.81914	1.33262	1.19808	1.47596	1.701	3.01114	1.71627	1.09209	1.85922
AL020997.1	0	0	0.160702	0	0.0542397	0.124675	0.214101	0.485017	0.785208	0.463929	0.221096	0.210138	0.316958	0.309225	0.189048	0.252996	0.157003	0.514743	0.311578	0.732106	0	0.228057	0.202088	0.247886	0.131657	0.189225	0.581759	0	0.745426	0.3694	0.315301	0.0525482	0.0728697	0.44496	0.121318	0.374696	0.141831	0.213904	0.360971	0.112529	0.246446	0.616816	0.435031	0.289602	0.365545	0.238403	0.0573729	0.396544	0
SLC6A13	4.20735	0.625384	3.14154	1.44237	2.01654	0.246118	0.070442	0.101952	0.322929	0.546954	0.577399	0.46092	0.145997	0.466303	0.342095	0.072834	0.146358	0.127018	1.76408	0.180654	0.0398009	0.215722	0.205009	0.34662	0.774289	0.316476	0.271158	0.233637	0.398538	0.0202562	0.26799	0.311202	0.0599376	0.0658788	0.0748407	0.0968626	0.209988	0.263914	0.212078	0.282303	0.876719	0.164889	0.526517	0.341429	0.157853	0.426505	0.141573	0.186383	0.0994801
IQSEC2	29.0089	5.73555	33.3863	20.2242	24.4954	1.66871	2.99443	1.64522	3.7197	1.70935	5.36989	2.12788	3.02207	3.54978	3.7781	2.92332	2.09354	2.83841	4.42544	3.50651	0.966804	2.27789	2.14429	2.14665	5.11821	3.15875	4.20435	5.32118	3.42848	4.64487	2.55527	5.03396	3.38259	1.33387	1.27713	1.36849	5.19376	4.67516	7.19672	3.33381	2.98971	3.28531	7.66388	3.35355	3.91458	3.46578	1.8867	5.06049	4.04315
TAGLN	5.92346	8.009	5.53644	6.71165	10.5498	14.2243	86.6057	85.531	214.851	80.6249	50.3072	37.6271	14.0356	18.6203	23.5872	31.0962	14.2825	17.8407	15.9673	21.3835	23.3428	18.4604	80.3417	20.717	5.35498	21.1702	159.424	93.3403	88.1181	35.2005	70.6162	45.0407	25.3536	12.6707	60.7967	34.0288	16.4659	160.311	5.41241	14.0266	15.2663	21.351	7.05446	61.7556	11.9734	55.4773	53.3064	79.3143	22.2321
TP53	2.31786	4.20808	1.93315	5.23286	3.09242	32.8879	13.4217	36.3399	24.1477	20.6777	27.2793	20.2537	10.3255	11.8448	25.2613	30.9461	39.4017	20.3105	8.74863	3.75326	14.8636	32.4859	32.5765	30.7331	15.106	24.0546	23.505	15.1862	17.1023	25.2917	32.9524	26.8194	21.4708	32.2024	21.7992	16.1515	23.1586	12.6318	18.4085	16.5631	25.1353	14.0422	13.5614	16.7681	18.544	37.6431	37.9809	30.6654	15.6703
SLAMF6	0.0124899	0.0233786	0.0816972	0.0592344	0.0620418	0.332754	1.4966	0.0547935	0.898157	0.363602	0.1686	0.222561	0.692876	0.117902	0.808904	0.401928	0.19289	0.261683	0.0461997	0.718994	0.105426	0.137677	0.179789	0.141772	0.761344	0.569169	0.197168	5.55548	1.63425	0.156495	0.0868244	0.213714	0.574201	0.0678621	0.0693843	0.170077	0.234336	0.92432	0.838897	0.0143017	0.289727	0.235181	0.458116	0.134958	0.389091	0.0681741	0.357295	0.115196	0.019214
C17orf53	0.291043	0.320454	0.32973	0.358605	0.333867	1.23078	0.870298	2.1906	0.74475	0.94291	2.2404	1.35043	1.56081	3.86068	1.47837	1.70421	2.19419	2.54074	0.645328	2.75177	1.1641	1.42365	2.94163	1.3531	1.10093	1.34057	0.653131	0.452072	1.12546	1.63028	2.18493	1.70272	0.609341	3.19367	2.74751	0.957376	0.980095	0.434748	1.85659	2.14986	1.66724	0.474594	0.793955	0.852068	2.12272	1.59207	1.7591	1.15794	1.36074
AC092451.1	0	0	0	0	0	0.28439	2.44187	0.245855	0.597032	1.23462	0.630411	0.479335	0	0	0.431227	0.577096	0.238754	1.17415	0.473816	0.151815	0.94608	0	0.307314	0.28272	0	0.431632	0.331755	0.119986	0.850175	0.561745	0	0.23973	0	0.40599	0.276731	0.976799	0.323522	0.243962	0.352882	0.641707	0	0.879366	0.283522	0.440396	0.104228	0.407856	0.39261	0	1.20697
AC002504.1	0	0	0	0.0294243	0.0273946	0.314845	0	0.0544367	0.0660969	0.117157	0.139585	0.141511	0.0960508	0.0520596	0.0954816	0.255559	0.290754	0.129989	0.0786837	0.235303	0.139653	0.460735	0.27218	0	0.0664955	0.0318571	0.048971	0.106268	0.0941221	0.217666	0.0796237	0.345023	0	0.224734	0.0612733	0.0270351	0.143267	0.432142	0.65112	0.0568342	0	0.545182	0.0627769	0.0975118	0.046156	0.481637	0.231816	0.057223	0.0381778
RNU5B-4P	0	0	0	0	0	0.783993	0.673165	0.16944	0	0.24311	0.347578	0.220235	0	0.324082	0.594394	1.19318	0.493639	0	0	0	0	1.25483	0	0.194847	0	0.396635	0.762139	0.165386	1.17186	0	0.33045	0.165219	0	0.279804	0.38144	0.336599	0.222968	0.672545	0	0.353806	0.193716	0.72726	0	0	0	0.187393	0.360777	0.712452	0.712997
EMILIN3	1.00742	2.11963	1.37898	0.782008	0.663236	1.24941	0.807053	3.65654	2.44247	7.61358	7.55159	7.32223	0.856739	9.55715	2.35221	0.848996	41.8653	8.70778	0.195749	1.65213	79.525	8.95829	14.7771	6.31293	0.780735	2.94012	0.793379	0.125738	3.42668	13.7887	9.97201	8.28555	1.72849	14.6209	4.31653	12.6527	0.958422	1.87811	28.4936	15.9273	19.2819	0.737222	12.7645	13.6235	3.07932	36.4286	22.708	3.42703	46.0414
AL591686.2	1.22749	0.180204	0.039358	0	1.19556	1.96947	1.25846	0.395955	2.21153	7.83991	4.67035	0.66905	1.76989	1.02239	0.370401	2.41651	3.84519	0.945502	0.763094	1.12471	1.62527	5.86467	0.593925	3.27836	4.54647	0.741498	2.1372	0.541072	1.36923	6.69482	0.656379	3.20456	5.35401	1.63464	0.0891366	3.6576	0.208417	0.785816	3.82672	0.330715	1.35805	3.22903	1.50684	4.61026	6.9495	0.131373	2.57139	5.57737	0.44431
AC021074.2	1.49553	0.373242	2.17384	1.0639	1.10056	0	0.434426	0	0	0	0.112155	0	0	0.209146	0	0	0	1.56667	0	0.675225	0.140262	0.347058	0.956783	0.377233	0	0.127984	0	0	0.37813	0	0.213256	0.106624	0	0.361142	0.369243	0.217224	0	0.217013	0	0	0.125014	0	0	0.195874	0	0.120934	0.232827	0.344835	0.153377
FABP3	105.851	31.9528	85.8769	81.1703	69.7962	11.1536	26.0723	31.0532	24.2164	16.149	10.4914	26.5428	9.61712	20.1078	5.70178	13.6832	28.8567	11.5561	15.9861	12.9948	9.92278	8.45567	41.3823	12.7112	10.2555	18.0654	4.15566	10.0198	14.3262	6.6387	11.5295	10.0991	12.5422	7.99158	10.0279	22.3046	12.5677	62.0649	5.06932	6.60282	9.93387	14.2149	122.801	12.2152	14.8434	20.01	19.262	9.51915	15.7103
TMEM176B	7.55617	13.9706	12.0729	9.0411	7.71917	25.2077	220.841	32.6358	159.982	37.7438	7.94433	67.9277	89.2214	19.0954	66.6779	41.7608	64.0416	34.7217	10.4675	108.709	44.4345	42.4805	104.088	32.4475	51.1376	71.1565	61.5052	190.118	93.5646	20.6725	16.8572	41.8403	51.6598	21.2181	38.7563	12.2906	54.9766	168.109	141.166	15.0422	199.813	71.2351	77.2665	24.191	12.6673	75.4984	105.316	66.2448	33.0461
AC005912.1	3.63149	6.29389	3.88564	4.86378	8.01726	34.3827	53.9166	38.7959	81.4948	67.8334	29.4276	35.279	28.4571	19.0446	23.7175	31.5094	21.3446	30.6454	52.3093	32.7921	52.4129	24.0336	24.8924	32.3997	21.6228	52.3138	38.1518	26.2768	51.0105	36.8224	17.8365	22.2949	32.7119	65.1613	24.7398	100.659	17.3731	44.9379	35.0059	45.4328	28.2483	82.9418	32.1514	33.6903	25.2649	19.6587	23.7922	17.5221	55.9689
ADAMTS15	0.471567	0.199922	0.273522	0.372739	0.33368	0.410342	3.2665	16.6728	1.32035	0.675462	5.05983	1.01697	2.1293	2.25744	4.2954	2.0856	2.28268	2.4225	3.68028	1.19148	0.259409	0.747095	0.849542	6.0008	2.31645	1.60647	6.03351	5.64034	0.699337	7.77205	4.44194	4.37713	8.42338	5.62803	2.55248	1.7453	9.29686	0.289504	0.380687	20.2835	1.51991	0.891736	0.772301	1.38372	0.885471	1.20998	4.00604	3.88929	2.36233
AC104958.2	0.105207	0.112529	0.0327696	0.124738	0.0995424	0.686423	0.327438	0.659347	0.560404	0.283806	0.710083	1.09268	0.911318	0.662083	0.963742	0.928613	0.496235	0.86595	0.270025	0.753222	0.0634313	0.453416	0.556317	1.11837	0.342297	0.443737	0.682118	0.241338	1.08302	0.640271	0.948343	0.980455	0.289755	0.381082	0.352523	0.261964	0.824259	0.0981409	0.441643	2.08237	1.01764	0.49525	0.304146	0.413378	0.279525	1.80479	0.544011	0.554476	0.5549
AC002454.1	0.231392	0.128331	0.280286	0.0914492	0.0851409	0.717582	0.448104	3.7503	0.342376	6.51367	0.173529	1.13617	0.165845	1.21349	0.428641	1.98566	5.69572	0	0.217373	1.25367	0.904237	2.4164	1.40987	0.0972776	0.482217	0.627064	1.54736	0.110092	1.56014	0.676495	0.384947	0.604895	4.68977	0.139692	2.06304	3.86509	0.185528	0.447691	0.83644	1.44254	2.12768	9.92432	0.130071	0.505102	1.19542	0.0935563	3.9626	1.36349	0.197758
KIAA1324	5.1778	1.83849	5.47785	5.41099	4.75073	0.395347	0.35352	0.196168	0.422352	0.356901	0.226094	0.136688	1.24416	0.702057	0.948283	0.84498	0.506697	0.907885	0.530063	1.55601	0.11414	0.566986	0.293237	0.393026	0.699107	3.24281	0.49303	1.00869	0.468556	0.794779	0.427933	0.512712	0.2215	0.417449	0.371043	0.353538	0.819659	1.46094	0.222543	0.149911	0.293635	0.173604	1.31303	0.289809	0.468119	0.380227	0.39831	1.48811	0.734693
GDF15	0.271158	0.246086	0.438935	0.915778	0.226757	14.688	6.05074	5.55134	2.40729	5.4048	4.4922	21.1311	0.455831	4.51604	3.84633	20.3499	1.39151	5.07862	0.234467	2.86034	33.026	5.42499	7.6375	1.65812	1.50813	1.12861	22.6755	11.8486	2.52425	12.5091	5.7999	3.10195	6.08066	5.19373	5.09215	9.99855	2.32434	4.66801	3.03542	2.19226	5.18243	3.82935	0.706699	6.97375	24.6577	6.59801	2.19708	19.2116	0.834278
AP002770.2	0.0322344	0.160896	0.105423	0	0	0.204472	0.561814	0.141413	0.772662	0.608689	0.362605	0.229756	0.249515	0.54095	0.206697	0.580892	0.240324	0	0.272533	0.305628	0.0906957	0.224413	0.441908	0.243925	0	0.24827	0.222625	0.172536	0.244505	0.28272	0.206842	0.551558	0.143411	0.17514	0.119379	0.456497	0.279129	0.210486	0.270631	0.332192	0.0808362	0.20232	0.244617	0.126655	0.299754	0.351891	0.225825	0.185813	0.148764
RPL21P17	0.0361025	0.045051	0.039358	0	0.0398519	0.27481	0.943848	0.673124	1.34615	0.738542	0.121835	0.154396	0.326033	0.0378665	0.138901	0.836485	0.153808	0.378201	0.610475	0.146702	0.152369	0.167562	0.0989875	0.364262	0.0967335	0.463436	0.24934	0.154592	0.410769	0.452353	0.193053	0	0.32124	0	0.0891366	0.589935	0.260521	0.628652	0.0757767	0.124018	0.135805	0.339898	0.22831	0.425562	0.13429	0.306536	0.126462	0.0832444	0.555387
RNA5-8SP6	0	0.140784	0	0	0	0.429391	5.89905	0	0.30048	2.13041	0.126912	1.28663	0.582202	1.41999	0.144688	0	0.961297	712.081	0.596167	0.76407	1.11102	0.261816	0.618672	0.14229	0.453438	10.717	0.333937	0.9662	1.71154	5.08897	0.120658	0.36196	0.167313	0.408661	0.974931	0.614515	0.162825	0.736702	0.236802	0.387557	1.83902	0.885152	0.856161	0.443294	0.209828	0.273693	2.76635	0.390208	10.4135
RCN3	2.51536	1.44161	2.40275	2.50631	3.12932	4.189	31.7021	12.931	12.9621	4.12578	4.76504	10.5119	4.06958	9.37571	7.33437	5.06234	6.16094	10.5573	5.1002	10.8648	19.9179	6.81646	7.87395	8.34948	5.19197	4.39634	12.4653	11.5778	9.88161	5.98508	7.72856	7.24635	12.8433	18.2521	11.9757	3.43635	4.87185	4.93997	2.22705	3.5651	12.9138	3.48411	5.65811	6.47086	3.74863	8.66612	13.556	10.2584	11.6464
ELOBP1	0	0.239767	0	0.056953	0.0530242	0.426584	0.837213	0.210733	0.895548	0.831477	0.216141	0.547811	0.309856	0.151148	0.246416	1.3603	0.306969	1.25802	0.355362	1.30127	0.810926	0.278683	0.460971	0.302914	0.321767	1.10991	0.379148	0.154267	0.546541	0.421309	0.41098	0.102741	0.142474	0.434989	0.237198	0.627942	0.138652	0.940998	0.655351	0.495031	0.421616	0.226123	1.03283	0.471853	0.223346	0.407856	0.224349	0	1.10844
AL139396.1	5.64778	2.05022	3.1345	0.973998	1.24686	0	0.447433	0.900976	0	0	0.115513	0.731918	0	0.107704	0.131692	0	0	1.07572	0.759667	0.139088	0	0.11915	0.140776	0	0	0.131816	0	0.879416	0.389451	0.257327	0	0.109816	0.304569	0	0.126766	0.111864	1.3338	0	0.107766	0.587911	0.128757	0.161129	0	0	0.190981	0	0	0.118387	0
CD93	0.792501	0.322201	1.52726	3.29474	1.10338	13.6444	21.1866	14.633	14.7205	2.89644	15.4629	9.55904	19.6039	4.36526	19.8681	19.7639	12.0022	6.33365	3.97701	17.7082	2.49235	16.4007	13.7349	17.0013	2.52072	3.86249	34.6814	45.8069	31.2685	9.99384	17.0495	10.851	16.8065	3.85218	13.0087	7.46081	18.4071	5.8204	2.80632	7.51727	9.79598	8.07098	1.77188	4.37452	5.88143	11.1073	28.6915	21.4505	3.34677
HOXC-AS3	0	0	0	0	0	0.00699768	0	0.072594	0.0146906	0.0347188	0.00620476	0.015726	0.0213481	0.295052	0.09196	0.0142	0.0704972	0.0577823	0.0116587	0.0971247	0.0853572	0.204804	0.151235	0.0139132	0.125623	0.155771	0.157821	0.0236189	0.104597	0.545981	0.005899	0.0353927	0.0981597	0	0.0817109	0.126184	0.0398029	0.120059	0.0810413	0.0505274	0.401139	0.121171	0.334864	0.0758547	0.0153878	0.167262	0.0901653	0.0254365	0.0593973
KIAA0040	0.602338	0.483194	0.762185	2.61432	0.775708	5.75394	5.85835	12.5399	9.31029	6.39791	3.52901	12.0876	12.4749	7.63386	13.3574	12.5807	25.4972	3.24886	10.6437	7.72153	5.972	12.9505	8.16911	12.001	6.88313	4.69904	17.5562	12.9307	18.0851	14.7483	12.4082	29.3743	12.5004	37.214	8.36086	9.66286	7.56506	20.4307	6.29875	9.6929	8.92376	8.1069	3.81367	17.067	3.96422	20.8703	32.1174	14.7401	3.89398
EEF1DP1	0.191392	0.358246	0.312975	0.181538	0.295776	1.38402	2.08486	2.39297	3.31333	2.40939	1.52861	2.53737	1.1852	1.4855	1.15363	2.70997	2.44616	2.90721	2.32612	1.39989	3.85032	1.86544	1.28568	2.14832	1.43589	2.30942	1.98275	1.65958	2.25021	1.39088	1.39187	2.12867	1.81654	1.35186	2.40997	3.37764	1.65733	2.04128	1.76756	3.52838	2.11185	2.1623	2.05759	2.25605	1.44163	1.55541	2.68167	0.772287	3.62148
RAB20	1.29914	2.36829	2.04439	2.91991	4.06526	9.73135	42.0861	8.73489	28.5832	12.1416	10.2299	20.259	12.7816	9.4317	8.82311	18.235	9.84221	9.58582	3.77274	14.2916	29.5921	8.83481	20.6909	11.1132	15.2707	9.29544	14.5231	31.5154	15.9383	8.93159	5.75088	8.45687	24.9792	15.2222	8.89751	13.2787	13.9888	11.606	12.0217	22.094	7.2808	12.8871	16.4457	7.32398	19.2351	8.04348	18.2952	13.2845	26.1028
AC005746.2	0.0364866	0.0910605	0	0.04326	0.0402759	0.185156	0.158981	0.0800335	1.26329	0.114831	0.656701	0.104026	0.0941434	0.344424	0.374342	1.03325	0.272027	0	0.578409	0.593048	0.20532	0.254017	0.250101	0.0460171	0.0488813	0.42153	0.32399	0.156237	0.276759	0.411449	0.31217	0.0780397	0.162329	0.396488	0.0900848	0.675706	0.315951	0.95301	0.612662	0.208896	0.320249	0.286262	0.507625	0.215045	0.84824	0.0885135	0.340819	0.33652	0.224518
CBX3P9	0.0310665	0.1163	0	0.110501	0.0685857	1.69474	1.89511	3.16872	4.13704	2.54208	3.35488	1.06287	0.9619	1.30337	1.47414	2.8792	1.125	0.976333	1.60879	2.65099	1.48596	1.11746	1.27769	1.21462	0.707539	1.95407	1.22605	0.698395	2.94558	2.60799	1.66123	0.996702	1.29001	1.57542	1.4957	5.51639	1.21057	3.31338	3.0973	1.03161	0.623259	1.36493	0.864433	1.0986	2.39782	1.35657	1.48723	1.3252	1.19479
GABRA2	12.1967	2.2888	12.502	10.0945	7.65913	0.539792	0.175373	0.0520252	0.137823	0.784901	0.168166	0.317614	0.346784	0.31812	0.0682084	0.884436	2.07908	1.89734	0.53626	0.473121	1.39331	0.582095	0.894663	0.291879	1.11308	1.74925	2.63649	0.826332	1.35201	0.0342203	0.13067	0.424279	0.0255807	0.411332	0.305216	0.377384	0.479222	1.43298	0.437478	0.0543165	0.605601	0.117288	1.30536	0.384064	0.0507949	2.92569	0.637786	0.447447	3.10689
GNAI2P1	0	0.067934	0.118699	0	0.0600941	0.069066	0.474421	0.23883	0.289987	0	0.24496	0.155213	0.210702	0.228401	0.488724	0	0.057983	0.285151	0.632883	0.147478	0.229762	0.189505	0.298534	0	0.583472	0	0.214851	0.0582787	0	0.136424	0.0582222	0.2911	0.16147	0.0985975	0.134412	0.652362	0.314279	0.355488	0	0.124674	0.204785	0.341697	0.275421	0.32086	0.354376	0.198102	0.254262	0.0627636	0.418744
RPL5P6	0.0193552	0	0.0211005	0	0.0213653	0.343771	0.674684	0.424557	0.824793	0.609147	0.174181	0.137958	0.0749109	0.101504	0.198579	0.348798	0.144303	0.20276	0.429563	0.104866	0.272292	0.157208	0.159207	0.0976435	0.0777907	0.322993	0.210061	0.124319	0.367034	0.315269	0.206998	0.186291	0.22963	0.175272	0.334514	0.780143	0.167603	0.294903	0.203126	0.221628	0.0728073	0.546676	0.195841	0.494328	0.14399	0.140862	0.158196	0.0892575	0.297753
NPS	0	0	0	0	0	0.241731	0.276746	0.557271	0	2.99836	0	0	0	0.0666169	0.162908	0.654042	0	0	0	0.0860286	0.0893521	0.442177	0.174145	0.0801039	0.0850896	0.163061	0	0.0679919	0	0.0795806	0.135852	0.0679234	0	0	0	0.20757	0	1.24421	0	0	0.0796386	0.199323	0.160662	0	0.118125	0.0770395	0	0.0732242	0.097707
CDK2	0.537273	1.04963	0.542512	0.924191	0.758353	9.09006	4.8164	15.2772	7.43622	10.1247	15.0054	9.81233	9.13582	6.32348	8.46043	11.4848	13.138	9.61891	3.49996	15.7715	6.98846	7.74151	16.9469	9.60321	5.6993	8.99411	4.95331	3.71493	7.31557	16.7193	12.6129	8.80231	5.68846	20.7294	12.0963	14.7905	6.47655	3.54666	11.7623	9.90888	7.61475	11.8304	3.48122	4.19615	14.1041	14.225	11.765	7.75793	8.40069
CLIC5	0.590874	0.247362	0.835324	1.39887	0.765854	0.396571	0.116272	0.0857089	0.0964528	0.13797	0.0814763	0.0950997	0.317212	0.0659728	0.241999	0.0883251	0.176617	0.0599017	0.608346	0.175557	0.0214516	0.278665	0.112361	0.197121	0.472405	3.07554	0.0789839	0.306065	0.0506023	0.126575	0.0428076	0.275182	0.121547	0.0310686	0.035295	0.213868	0.145795	0.149355	0.440072	0.139682	0.143397	0.0717802	0.241074	0.348249	0.0531741	0.215012	0.0756682	0.131848	0.0586437
RN7SL68P	0	0.0690297	0	0	0	0.07018	0.241036	0.182012	0	0.261147	0.186683	0	0	0.46417	0.709438	0.142412	0	2.60775	0.584628	0.224784	0	0.898619	0.682535	0.348839	0.0741103	0.426063	0	0.0592187	0	0	0.236645	0.473273	0.164074	0.701314	0.614611	0	0.239511	0	0.0580547	0.126685	0.346813	0	0.0699658	0.217357	0.154325	0.201297	0.387545	0.446431	0.0850996
LEFTY2	0.0931995	0.0447308	0.101603	0.195502	0.150361	2.60124	4.81065	1.06934	1.48934	1.81631	7.29849	0.378137	0.28672	0.812103	2.33533	17.8289	3.76441	1.01388	23.0711	5.60301	1.86586	1.49734	3.82325	5.79581	2.40115	3.38665	14.7833	2.58636	2.03925	0.395241	0.981404	4.63083	1.20141	3.38888	3.28346	1.03091	6.17702	2.23146	1.46714	6.88746	4.87221	0.731212	1.75002	0.661976	2.1267	3.87839	2.74565	24.2255	1.48889
LINC01579	0.131234	0.0472389	0.0797875	0.0987436	0.10029	2.17078	0.47285	1.51681	3.34061	3.38755	3.1427	1.48583	3.58798	4.39937	2.48246	3.1446	2.22563	2.45872	0.149362	3.30897	1.31365	3.92396	1.71261	0.757539	3.93215	5.72441	1.21263	0.364725	2.56516	0.793698	1.63292	3.19825	1.75906	1.23867	2.93793	2.93072	5.32869	3.58156	5.58316	5.09762	5.01882	6.08265	8.4236	2.79637	0.443557	2.8775	1.70616	2.93867	1.1686
SERPINI1	119.19	78.7558	130.834	112.214	125.822	6.77507	3.61555	2.15458	3.32442	17.2982	6.7174	3.64972	4.61139	4.15075	1.90093	6.48159	2.86282	6.50081	10.4409	2.52642	1.86575	2.21363	3.84047	4.79431	11.9337	14.7756	3.03683	4.91212	10.9204	1.43956	3.62552	4.70997	6.279	4.80387	3.00301	34.9057	8.7923	36.1222	1.2653	2.50122	2.61444	5.08571	28.677	10.5613	2.37423	3.65603	0.96058	6.4103	24.9189
PLEKHG5	12.7996	2.48627	12.8083	7.58638	11.0213	2.62516	2.64548	1.55192	1.37943	0.596638	3.51524	1.27529	1.70723	3.21783	2.86666	2.13721	1.16925	5.19206	1.99306	2.20194	0.50551	4.99462	2.86055	2.20656	1.09227	1.56192	3.0416	2.8757	4.0414	1.73881	2.14673	1.30919	1.77506	0.785431	1.99768	0.488629	2.83617	1.15431	0.959665	1.2372	1.64686	1.1199	2.05924	1.39727	2.68931	2.22736	1.90104	2.51132	2.38267
CYP2E1	0.891212	0.380341	0.889962	0.431116	1.12936	0.241957	0.0698983	0.0430073	0.0379777	0.120607	0.0822071	0.0990954	0.057488	0.295383	0.185157	0.0825965	0.0740382	0.0653527	0.858986	0.219699	0.032598	0.0641137	0.0684198	0.23604	0.138499	0.10525	0.0457236	0.0801401	0.182521	0.0937994	0.487999	0.358361	0.0502234	0.106529	0.0990175	0.0543681	0.138912	0.11639	0.0224471	0.681686	0.105042	0.139843	0.247982	0.196098	0.0795605	0.270251	0.116547	0.0616481	0.0575822
PACRG-AS3	0.145914	1.64351	0.0879077	0.933297	0.462009	0.0487143	0.133849	0	0.0306804	0.12689	0.207333	0.0875811	0.178337	0.294004	0.792836	0.0395413	0.0327177	0.221238	0.0608715	0.312061	0.00540194	0.0311881	0.336903	0.203399	0.288078	0.556985	0.0113655	0.14387	0.043689	0.0144336	0	0.29977	0.00569448	0.0208631	0.602011	0.12549	0.182878	0.1588	0.0402977	0.268206	0.0192588	0	0.398238	0.279118	0.0607025	0.0279454	0.0134504	0.0398421	0.147676
LINC00618	0.0382784	0.143298	0	0	0	0.437058	0.166789	0.209909	0	0.0602348	0.0861187	0.0545671	0.0987665	0.56208	0.294544	0	0.244616	0.200497	0.121362	0.103695	0	0.488567	0.15743	0.193107	0.205127	0	0	0	0.435525	0.0479615	0.573125	0.368424	0.113534	0.277305	0.0945086	0	0.0552443	0	0.0803436	0.131493	0.191986	0.180192	0.0484139	0.150403	0	0.278581	0.134083	0.132392	0
LINC01605	1.03658	0.857656	1.14234	14.3742	0.945239	0.0714711	0.981883	0.0865014	2.1306	0.390062	0.13942	0.112433	0.348862	0.141813	0.158948	1.04423	0.216008	0.177049	0.178615	0.900418	0.110956	0.091515	0.139018	0.326836	0.196232	0.361584	1.74531	0.241233	0.299125	4.31994	0.144599	0.253039	0.534697	1.06112	0.097365	0.14729	0.308962	1.44694	0.0945964	0.064508	0.169533	0.229837	1.65307	0.177085	0.0942984	0.615	0.171025	0.376705	0.138664
MZB1	0.015089	0.0376581	0.0164497	0.0089451	0.133249	0.105285	2.53125	0.0165489	1.30609	0.842916	0.0254605	0.247364	0.253065	0.0791314	0.290267	0.0582681	0.0241064	0.0790345	0.0398669	0.592701	0.0955238	0.166327	0.0930866	0.104667	0.161719	0.755403	0.200979	0.145376	0.200294	0.0567182	0.0806863	0.153298	0.0335656	0.013664	0	0.0328751	0.0653307	7.09412	0.205861	0.0172778	0.368937	0	0.0763376	0.133398	0.0561264	0.128117	0.123328	0.026094	0.0696372
SHOX2	0.0067983	0	0.00741131	0.0201509	0	2.95827	0.814603	3.68702	1.57524	4.3861	0.126182	6.21691	3.21002	1.58296	2.42812	4.01662	5.78893	2.31456	0.079032	3.84443	4.97325	3.8455	2.10164	1.39757	1.33428	1.94607	0.932332	0.705929	2.99086	0.574968	10.4587	6.00526	2.99936	4.53099	4.27175	4.77678	0.848693	2.27879	1.85499	1.87216	12.7523	1.50411	1.03611	3.01176	0.502589	2.62637	4.80238	3.75033	4.23558
PRKCE	23.4349	5.38004	21.5801	18.8034	15.8575	2.14967	0.633487	1.9514	0.571603	1.2937	1.37261	1.54453	1.45586	2.73211	2.6281	1.38129	2.05173	1.61369	2.89559	1.28001	1.12736	1.68695	2.64565	3.16082	2.61555	2.54392	0.736001	1.50264	1.53603	0.93251	2.04354	1.32899	1.23975	1.78989	2.51057	0.967248	2.1707	1.8422	1.04443	2.38814	0.700978	0.985853	2.18689	1.0473	1.31496	2.06579	1.28327	1.71007	2.0848
TCTEX1D1	0.81318	0.165671	0.675434	0.524702	0.580102	0.238612	1.78367	0.643108	11.4624	2.49831	5.88674	1.73488	20.6535	0.127647	2.24892	2.62039	0.206214	2.52083	0.268929	14.2439	0.256815	2.00264	0.417104	0.439538	0.452073	0.923135	1.26623	1.3265	1.42665	5.31624	1.26605	0.887386	1.69817	0.781464	0.409741	3.28429	3.50484	8.58503	2.62407	0.0886797	6.8461	9.53954	3.13447	1.45629	2.81386	2.10691	0.400463	1.00766	0.212749
MT-TM	6.30467	1.25878	5.77347	2.39202	7.51619	0.319938	0	0	0	0.793682	0	0.359501	0	0	0	0	0	0	0	0	0	0	0.345728	0	0.675712	0	0	0	0	0	0	0	0.373993	0.456738	0	0	0	0	0	0	0.316212	0.79143	0	0.990892	0.234513	0	0	0	0.387954
AC105384.2	0	0.100309	0	0	0	0.0679869	0.233504	0	0	0.126493	0.0904246	0.114591	0.0691365	0.337248	2.57726	0.275924	0.142692	0.561392	0.0566359	0.21776	0.0753908	0.248725	0.844874	0.168969	4.02048	0.515935	0.185057	0.14342	0.101623	0.0335731	0.171937	0	0	0.436756	4.3663	0	0.077342	0.0583222	0	0.122726	0.571158	0.0420447	0.0677794	0.368488	0.174419	0.0650021	0.250289	0.0926744	0
ACTG1P9	0.0322586	0.0322035	0.014067	0.00764944	0	0.18007	0.787132	0.396253	0.670145	0.223354	0.312075	0.404675	0.208086	0.331581	0.28132	0.548111	0.309221	0.40552	0.272738	0.314597	0.245063	0.254526	0.274189	0.292931	0.164225	0.314711	0.789321	0.262452	0.90535	0.40419	0.303597	0.386381	0.516668	0.31549	0.382301	0.379529	0.456254	0.365117	0.182813	0.199465	0.27505	0.374574	0.350882	0.545028	0.509965	0.336504	0.384191	0.23802	0.307678
BRINP1	36.783	11.749	37.6869	44.2518	36.0754	2.06137	0.918469	0.168573	0.842113	1.79671	0.740996	0.732443	1.21808	2.07272	1.67831	0.361775	1.5622	4.23236	8.09407	0.755422	0.352146	0.331209	1.42683	3.86037	9.24263	5.76121	12.5867	4.78102	1.6322	0.715308	0.986274	1.15061	1.77141	3.15752	7.80658	0.822837	7.97307	5.62044	0.313391	2.48407	1.24444	0.372104	8.70909	7.48003	4.47984	5.73683	0.184592	1.68088	4.3574
C10orf90	1.08016	14.1386	0.942757	2.52653	2.53956	1.09296	0.753612	0.128846	0.269431	0.611082	1.53444	0.618711	0.513623	0.177983	0.753314	1.10895	0.305859	1.21359	1.47609	0.163545	0.123954	1.15867	0.456322	0.839604	1.07548	0.787533	0.94015	3.01131	0.433177	1.45971	0.889952	1.86011	1.26795	2.14541	0.237683	0.700326	0.442711	0.696094	0.770564	1.2331	0.143213	0.337958	1.54777	3.09015	3.79934	0.538324	0.12574	1.39203	1.79721
IRX3	0.094256	0.00735116	0.0192666	0.0628615	0.104045	1.02389	1.43744	0.613792	1.44346	0.936278	0.3711	1.87271	0.334401	1.09365	0.58929	0.272985	0.564692	0.617126	1.57514	0.845805	1.45861	1.47646	0.411881	0.438356	3.18056	0.741084	0.406858	0.498202	0.692611	1.99293	2.29329	2.3436	1.67738	0.0533463	0.247261	0.0449223	1.80243	2.11571	0.513139	0.822954	1.28527	1.31262	1.7435	4.08543	0.213648	1.15043	0.79102	0.760667	0.380624
HMGB1P1	0.188744	0.403759	0.352737	0.255751	0.3274	1.19725	1.29235	2.12919	2.29801	2.37606	3.09377	1.69124	7.23542	1.18779	1.93645	2.3601	1.4359	1.41231	1.59578	2.30086	0.720717	1.28273	1.55252	1.5983	1.30043	2.80357	1.11732	3.17509	1.94297	1.38515	0.807421	1.67245	1.1996	2.97885	1.06515	1.968	1.43983	2.1715	5.17837	1.60548	1.85949	2.36931	0.750263	3.70805	2.50738	3.63031	1.07042	1.05692	1.28586
FABP5P2	0.0840623	0.0524491	0.137463	0	0.139189	0.106646	1.8314	1.61342	4.70162	0.925963	0.614651	1.438	0.379573	1.1462	0.539034	0.541027	0.223831	0.220154	0.0888406	0.455446	0.76869	0.0975391	1.09481	0.265049	0.506784	0.701402	0.456163	0.269968	2.0723	0.157991	0.629314	0.584341	0.373993	0.076123	0.466984	0.503662	0.242642	1.18932	0.485212	0.048128	0.579722	0.52762	0.531603	0.412872	2.54056	0.764731	0.245382	0.290743	0.452613
AL359837.1	0	0	0	0	0	0.303217	0.260353	0.262131	0	0.282075	0.134429	0	0	0	0.0766292	0.153825	0.19092	0	0.063148	0.161866	0.0840594	0.138662	0.0819147	0.075359	0.0800495	0.0767011	0.176859	0.0639645	0	0.0748668	0.127805	0.1278	0	0	0.0737628	0.130183	0	0	0.0627072	0	0.224764	0.187517	0.226719	0.117388	0	0.0724762	0.139534	0	0.0919194
HADHAP2	0.0150098	0.0280952	0	0	0.0165686	0.161859	0.228906	0.214006	0.399763	0.129907	0.236384	0.203271	0.116186	0.110202	0.18287	0.309131	0.159866	0.117929	0.261739	0.101653	0.200602	0.148037	0.133752	0.2177	0.140761	0.105972	0.207328	0.136579	0.398485	0.235085	0.144473	0.120389	0.255985	0.176699	0.268678	0.228917	0.194963	0.24503	0.299293	0.0945289	0.150564	0.153091	0.18035	0.265394	0.230305	0.209372	0.219072	0.103828	0.184724
HMCN1	0.0784563	0.0276431	0.0674185	0.0470577	0.0366795	0.435608	0.120654	0.458581	0.152415	0.0740753	0.319797	0.359211	0.276263	0.237188	0.420225	0.294651	0.343095	0.149874	0.333615	0.170029	0.053239	0.418758	0.378349	0.395798	0.0655381	0.107821	0.33604	0.249988	0.486589	0.07286	0.357343	0.270465	0.258709	0.031762	0.288282	0.265453	0.310384	0.0462083	0.121084	0.161706	0.224526	0.0796584	0.0548685	0.219416	0.0944163	0.34595	0.336251	0.446936	0.0681566
AC073115.1	0.0322344	0	0	0	0	0.0408944	0.702268	0.0707063	0	0.0507241	0.108782	0.0459512	0.0415859	0	0.124018	0	0	0	0	0.218306	0	0	0	0.0813084	0	0.124135	0.0318035	0.0690143	0	0.201943	0.0344737	0.0689448	0.0956073	0.0583801	0	0	0.0930431	0.350811	0	0	0.0808362	0.404641	0.0407696	0	0	0.078198	0.15055	0.445952	0
MRPL3P1	0.0166009	0.0207156	0	0.0196827	0.0183249	0.189547	0.940345	0.546211	1.01692	0.391847	0.261441	0.473302	0.235586	0.26118	0.19161	1.0257	0.282899	0.695626	0.35089	0.404743	0.490441	0.25041	0.409653	0.314057	0.333604	0.36227	0.524127	0.177713	0.503685	0.707212	0.319574	0.337316	0.221572	0.511122	0.389379	0.705295	0.311465	0.216803	0.296175	0.380179	0.124893	0.364686	0.209965	0.391369	0.478562	0.161089	0.542737	0.172251	0.383072
AC006445.1	0	0	0	0.050203	0	0.053718	0.553491	0.185757	0.112773	0.333151	0	0.0603607	0.163879	0.0444113	0	0.327021	0.0450979	0.443569	0.402744	0.172057	0.536112	0.147393	0.0580482	0.106805	0.113453	0.0543537	0.0417765	0.0906558	0	0.106107	0.0905679	0.0452823	0	0.153374	0.209086	0.184506	0.0611098	0.0921635	0	0	0.0530924	0.332205	0.0535541	0.083186	0.118125	0.0513597	0.0494398	0.0976323	0.065138
TCAF2	0.201562	0.145618	0.193716	0.628896	0.178582	0.676294	1.07471	1.42237	0.826436	0.659397	1.84075	1.28922	1.60128	1.73301	2.47952	2.0961	0.381337	0.791817	0.257866	1.52313	0.91411	0.424671	2.28333	0.89643	0.653766	0.408535	2.18493	2.22871	1.84071	3.75835	0.629675	0.876407	3.40608	7.26741	1.7156	0.288915	0.688974	0.386771	0.225449	0.270279	0.605234	0.823988	0.124112	0.880555	2.29363	1.70176	1.23558	2.53171	0.983265
CTNNAL1	2.7714	1.7565	2.41226	3.96124	2.37603	11.0412	10.0472	13.6839	10.1965	20.5039	11.1024	4.48946	10.698	7.45084	9.92511	12.4364	13.452	10.4712	5.25587	14.1622	10.1478	11.2423	13.4254	9.7606	6.90473	11.3335	6.29009	5.22415	8.76595	16.0379	11.2758	10.8654	8.98348	31.088	11.3524	12.5238	9.3591	5.03088	15.0137	8.5983	6.59976	9.74588	5.43101	8.04866	15.1065	10.7159	8.89562	13.0962	7.59999
SPATA3-AS1	0.06501	0.0463563	0.0556852	0.0550561	0.0512582	0.182624	0.0606997	0.234271	0.0742046	0.146142	0.0365649	0.185348	0.281563	0.126632	0.279895	0.0717268	0.326419	0.267547	0.137411	0.251587	0.189447	0.150865	0.222809	0.322107	0.404366	0.22055	0.187841	0.134216	0.246558	0.0989101	0.173815	0.481699	0.0964098	0.386861	0.343947	0.101171	0.167543	0.909656	0.263156	0.319029	0.186319	0.276883	0.152701	0.127719	0.138181	0.191504	0.195189	0.235555	0.14287
KLHL2	30.3645	31.2919	29.8966	37.8498	28.7367	5.77046	6.69636	4.1968	9.47194	6.45359	7.95139	4.27427	7.02793	5.41177	5.95822	4.93698	6.50961	6.54184	7.75115	7.13269	5.97519	6.92216	7.06743	7.01012	7.12604	10.2164	8.74814	15.3709	5.64383	7.90215	4.44764	7.65401	7.27741	4.46783	5.41277	8.13928	12.3939	12.0597	7.50183	3.85929	5.42003	5.62218	10.1445	8.14415	5.45292	5.99524	5.51257	7.05142	7.18116
LRRC37A7P	0.0745866	0.0775615	0.0880883	0.0294777	0.0480274	0.0473124	0.135414	0.163606	0.463516	0.469478	0.153821	0.124047	0.433012	0.0912693	0.39059	0.304026	0.0662002	0.195337	0.624041	0.740863	0.306044	0.288481	0.0255631	0.227333	0.283118	0.0957444	0.484465	0.552264	0.306451	0.233636	0.265893	0.445355	0.451665	0.484053	0.230191	0.0677103	1.08542	1.33936	0.463133	0.469732	0.576723	0.22432	0.0314453	0.427387	0	0.143245	0.0798313	0.422784	0.16255
VENTX	0.329896	0.0514581	0.134866	0.202554	0.253609	0.328841	4.80003	0.174446	1.41208	0.444964	0.245191	0.613041	1.74801	0.259511	3.37708	0.773459	0.583515	0.586269	0.261486	1.92301	0.182326	0.266582	0.856067	0.386348	0.655053	0.552032	3.12118	3.43066	1.40756	0.767648	0.680426	0.882001	0.672699	0.330747	0.196355	0.192524	1.60689	0.871929	0.395674	0.249584	2.98419	1.1832	0.588617	0.902729	0.399905	0.407296	1.74712	1.12062	0.0996873
RPL39P39	0	0	0	0	0	0.432234	2.47422	0.622778	0.30247	0.71484	0.127752	0.161894	0.439544	0.119116	0.728231	0.29237	0.362874	1.1897	0.240046	0.307652	1.11838	0	0.311385	0.143232	0.304294	0.291566	0	0.121575	0.430718	0.284593	0.242914	0.121453	0.168421	0.411367	0	1.4846	0	0.741581	0.23837	0.520165	0.1424	1.78203	0.574554	0.669344	0.316826	0.137753	0.265207	0.130931	0.524123
PNMA6F	7.38444	3.50467	10.6733	6.39012	12.3139	0.0554995	0.0381231	0.0191917	0.0233025	0.0413039	0	0	0.0338628	0.238597	0.0224414	0	0.0465935	0.0458279	0.157193	0.0948071	0.0369261	0.010152	0.0239893	0.110347	0.351646	0.336937	0.00863239	0.084296	0.132731	0	0.00935714	0.0654976	0	0.126768	0.0648059	0.038125	0.202036	0.171396	0.0183642	0.0100185	0.0219413	0.0137289	0.940612	0.103134	0	0.169801	0	0.0806961	0.0807578
TMEM270	0	0	0	0	0	0	0.0764804	0.0192507	0.0934963	0.0276205	0.157958	0.0500431	0.430246	0.03682	0	0	0.0373892	0	0	0.52304	0.049386	0.0407328	0	0	0.0470301	0	0.0519534	0.0375799	0.0665695	3.43084	0.11263	0.0563132	0	0.222525	0.0216683	0.0573632	0	0.725894	0	0.040197	0.0880345	0.908889	0.0222	0	0.832439	0.0425807	0.040989	0.20236	0.0270019
RPS27P15	0.0680504	0	0	0	0	0.34533	0	0.447807	0.362484	0.214168	0.68895	0.0970082	0.175585	0.214126	0.0872722	0.35038	0.0724787	0	0.287674	0	0.478672	0.315841	0.186584	0.343302	0.182335	0.0873541	0.268563	0	0.774266	0.0852649	0.145556	0.2911	0.100919	0	0.168015	0.889584	0.0982121	0.44436	0.21425	0.155843	0	0.320341	0.258207	0.267383	0	0.412712	0.158914	0.0784545	0.418744
AC026726.1	0	0.035606	0.0622131	0	0.0314969	0.0361993	0.248657	0.0312943	0.15199	0.134702	0.0320975	0.0813513	0.220869	0.0598555	0.10978	0.0734573	0	0.448366	0.0603111	0.077297	0.120425	0.0662163	0.0782347	0.0719735	0.152907	0.183138	0.0563044	0	0.108217	0.178758	0.0915474	0.0610294	0.0423154	0.20671	0	0.0932509	0.0823609	0.310534	0.149725	0.261381	0.286222	0	0.541333	0.112114	0.0796019	0.0692202	0.0999491	0	0.043895
SPTBN4	15.1085	3.96522	11.8412	13.5665	15.1254	1.43544	0.342907	1.97215	0.644617	0.817804	1.13749	2.60569	0.938662	2.73638	1.47963	0.944195	1.22407	1.66439	3.70347	1.54664	0.756193	2.79113	0.633082	0.666688	2.42493	0.98544	1.39763	1.15084	1.2333	1.53118	2.28039	2.82021	1.82991	1.46296	2.13917	0.373658	1.23222	0.940509	0.648258	1.11197	4.1817	0.326193	2.74568	1.32439	1.64178	2.70162	1.90366	1.86766	1.6104
KRT8	0.0205333	0.0256227	0.425311	0.0649202	0.0188881	0.117223	0.372786	0.120106	0.337238	0.0915483	0.184783	0.326858	0.0706404	0.100504	0.15361	0.370028	0.112992	0.125476	0.0868017	0.143696	0.240721	0.190601	0.159514	0.107903	0.151297	0.210863	0.253235	0.300407	0.233624	0.304442	0.124438	0.0841757	0.172555	0.043386	0.105617	0.123026	0.543293	0.595909	0.0969702	0.062698	0.175933	0.0375894	0.155821	0.0672327	0.0509181	0.203399	0.1918	0.252507	0.0894981
C22orf24	0.713714	0.231804	0.980584	0.637555	0.658329	0.248071	0	0.07506	0	0.0615398	0.208963	0.111499	0.100906	0.235856	0.100308	0.176188	0.0312394	0.256051	0.175655	0.211884	0.0825258	0.113444	0.335085	0.0863149	0.104785	0.125503	0.0578774	0.08373	0.1854	0.0980012	0.167298	0.07319	0.101494	0.0885353	0.156904	0.0426027	0.169323	0.0851226	0.0923447	0.0671707	0.0612954	0.0306826	0.0741941	0.0576231	0.218202	0.106731	0.102741	0.0563584	0.180485
AC005229.1	0	0	0	0.099424	0	0.106385	0	0.18394	0	0.197935	0.141496	0	0.108184	0.263862	0.0537716	0.215882	0.0446568	0	0.26587	0	0.117971	0.0973007	0	0.105761	0.112343	0.0538221	0.165472	0.0897692	0	0.10507	0	0.134518	0.186539	0.303748	0	0.182702	0.121024	0.182524	0.264014	0.0960206	0.0525732	0.197374	0.212121	0.0823724	0.03899	0.0508574	0.146869	0	0
IL1RL2	0.875595	0.18615	0.968692	1.19194	0.801861	0.0658269	0.339128	0.0426805	0.0518225	0.0102062	0.0656639	0.0277376	0.0836751	0.108845	0.108133	0.0500921	0.0483557	0	0.157655	0.0966358	0.0182489	0.0301029	0.115591	0.0736204	0.139027	0.0666058	0.095988	0.138864	0.172189	0	0.0554917	0.0554896	0.00961858	0.0822267	0.0480407	0.0353277	0.0748849	0.239995	0.0272269	0.0222801	0.0243976	0.0101772	0.131252	0.0254844	0.0120627	0.0786712	0.0378652	0.112163	0.0399106
AC009963.3	0	0	0	0.0418358	0	0.223825	0.153748	0.193497	0.0939772	0.0555251	0.0793851	0.0503005	0.045522	0.0740188	0.226261	0.0908391	0.187908	0.18482	0.0372911	0.143381	0.14892	0.0818847	0.193494	0.178009	0	0.0452947	0.0348137	0	0.133824	0.0884229	0.0377366	0.0377352	0.156985	0.191717	0.0435595	0.384388	0.152774	0.230409	0.148123	0.0808075	0.0442437	0.110735	0	0	0.0328126	0.171199	0.164799	0	0.108563
RPS4XP11	0.0222133	0.0554384	0.0968655	0.158022	0.0245203	1.77541	3.00047	2.02209	2.18899	2.09729	1.52426	1.10831	0.429864	0.745558	0.91161	1.94433	0.993672	1.39621	1.52594	0.752193	1.65625	0.773238	0.700413	1.00856	0.743983	1.05504	1.51223	0.546929	2.27466	2.05961	1.11655	0.665157	1.54829	1.93108	0.712977	2.83123	0.737354	1.20875	0.839237	1.52613	0.612764	2.78846	1.29237	1.39649	1.03283	0.996923	0.881848	0.614628	2.18702
P3H2	0.706753	0.649039	0.530332	0.863348	0.736247	1.42063	2.46627	2.40929	3.17796	3.64457	4.61184	2.4904	5.39573	1.02689	1.73429	10.9956	3.39876	3.79803	1.9239	2.70196	0.292686	1.13601	1.79939	0.883644	1.23786	1.50813	3.71595	4.62466	2.62242	7.81267	3.23281	5.12388	2.02363	9.8411	1.72608	1.77314	4.75561	3.12328	1.10454	0.630601	3.69051	3.40858	1.68717	3.28789	3.00161	4.09333	4.99417	7.12163	1.06371
SSTR2	12.5863	4.12886	9.97132	17.287	8.1437	0.423922	0.513876	0.694636	0.552589	0.563624	0.302183	0.607104	0.391645	2.11203	0.532169	0.20241	0.56292	0.617731	5.80034	1.12411	0.52232	0.281288	0.60181	1.2946	5.45681	1.62324	0.400793	0.495651	0.753756	0.125878	0.541885	0.763749	0.330364	0.363901	1.20786	0.418735	1.72099	2.04886	0.845756	1.8956	0.701047	0.14736	3.59925	0.604984	0.268084	0.535117	0.255007	0.59926	8.24487
AC006033.1	0.0402552	0.100466	0	0	0.177743	0.10214	0.350804	0.0882999	0	0.316728	0.271698	0.172155	0.0519336	0.802218	0.0516258	0.103633	0.0428748	0.210851	0.212717	0	1.01937	0.0934178	0.0551867	0.558471	0.37751	0.465068	0.0397171	0	0.763361	0.100877	0.473568	0.12915	0.477587	0.145813	0.496947	0.570086	0.174292	1.22668	0.0422464	0.967983	1.71616	0.189497	0.101828	0.15817	0.0748681	0.634762	0	0.0464097	0.247708
GALNTL5	1.03666	1.22925	0.730934	1.12515	0.660403	0.0392586	0	0	0	0.0730426	0.00580168	0.0220566	0	0.0811425	0.0132286	0	0.148314	0.0270143	0.098112	0.0349289	0.0145113	0.00598436	0.0919169	0.0975701	0.0552763	0.165513	0.00508857	0.0110423	0.117362	0.00646218	0.0386105	0.0717026	0.00764858	0.0373633	0.063669	0.0337106	0.141426	1.17872	0	0	0.0129338	0.0161856	0.508804	0.0810594	0	0.15014	0	0.0475682	0.150748
PCDHGC5	23.1215	4.58003	24.903	32.9308	15.0147	1.69599	1.18296	2.49515	0.732231	2.00091	4.8787	1.41091	1.43206	3.1035	2.29622	2.4153	2.09	3.2041	2.44068	1.71299	1.00078	25.6879	4.89507	1.03589	1.46869	0.772007	7.44254	2.14849	1.10787	4.14664	12.5146	2.85197	7.4256	2.67013	5.57885	1.0445	12.7566	1.23423	2.33708	1.80622	0.72393	0.28041	1.41698	2.52509	3.14145	2.25097	1.77359	7.16335	1.76577
RN7SL752P	0	0.149123	0.195419	0	0.065957	0.151608	1.04141	0	0.159139	1.97453	0.201644	2.21463	0.231258	2.56951	0.229888	0.30765	0.318199	34.7398	0.31574	0.323732	1.09277	0.207993	0.0819147	0.452154	0.560346	2.07093	0.471623	0.191893	1.81292	1.49734	0.25561	0.1917	0.177223	1.83968	0.51634	0.130183	0.258705	0.650283	0.313536	0.273676	1.12382	0.562549	0.906874	1.17388	0.611206	0.0724762	0.488369	0.137774	7.90507
MAGEC2	0.00861311	0	0	0	0	0.0218541	0.112589	0	0.206457	0.0406608	0.0290667	0.0122783	0.0666711	0.0180679	0.11046	0.243911	0.0183472	0.0451143	0	0	0	0.0299819	0.0708474	0.0108629	0.023078	0.0331691	0	0.0184408	0.130665	0.0107919	0	0	0.0255465	0.0623972	0.0106328	0.0281486	0.0124307	0.356202	0.0361566	0.019725	0	0.0540605	0.0108937	0.0507639	0.0080095	0.146263	0	0.0198599	0.0132501
C1QA	16.4746	35.2784	58.2163	26.4542	31.3262	73.1864	1577.19	50.7014	679.457	161.657	167.701	165.088	591.583	43.8494	228.502	144.834	109.387	133.887	74.4174	268.068	96.064	88.3521	117.27	229.05	414.565	449.61	322.042	1412.41	263.579	137.536	43.6872	108.637	325.352	40.6296	108.08	195.683	131.355	545.309	271.893	64.4198	142.403	344.587	234.44	101.733	141.454	64.3971	191.495	140.663	184.687
AC104046.1	0.0422382	0.105415	0.138141	0.100159	0	0.3751	0.552128	1.06547	2.47489	0.930524	0.285083	0.842968	0.163476	0.620227	0.433352	0.652431	0.13496	0.884952	0.0446391	0.5149	0.713056	0.490098	0.694863	0.479439	0.396107	0.921736	0.250042	0.271298	0.320386	0.158769	0.18069	0.406537	0.438475	0.076498	0.677855	0.506143	0.304796	0.827429	0.664912	0.338556	0.476655	0.397664	0.320533	0.414905	1.45329	0.563565	0.295908	0.292175	0.389865
RIMS1	7.56189	1.46421	8.54054	6.99258	5.25495	0.248385	0.07596	0.0147075	0.0535732	0.173036	0.543057	0.0344095	0.780246	0.789058	0.177138	0.0655934	0.227094	1.79814	0.473353	0.441378	0.0188654	0.113587	0.474309	0.867625	0.38985	0.716101	0.0873229	0.106231	0.193264	0.0168023	0.230899	0.305464	0.0596611	0.184581	1.34588	0.074503	0.503195	0.359018	0.530564	0.130519	0.248855	0.0210421	0.57497	0.239742	0.199523	0.297664	0.00782888	0.196345	0.379581
HMGN1P38	0.0565964	0.211873	0	0.067103	0.187422	2.15404	3.20586	6.021	6.18016	2.13744	5.28422	3.71128	2.11745	2.96808	2.75815	4.07967	3.73732	4.74311	2.75142	3.7563	1.9109	2.95515	2.25009	2.92657	1.89556	3.12399	4.29967	1.75702	4.50761	3.26202	4.60013	2.60261	2.18224	2.46006	3.9126	4.74739	3.02221	0.862322	4.3953	1.74976	3.19343	1.50972	2.29063	2.89092	3.68411	4.73679	2.97373	3.13197	4.17915
ABCC3	0.119509	0.082356	0.134175	0.463153	0.110262	1.62705	15.4976	0.960544	7.51556	4.54431	2.85928	1.93758	7.14521	12.7444	21.8828	10.3321	1.68512	5.1386	1.04435	10.8359	4.28098	3.31564	15.0242	0.989842	0.795757	1.19523	37.8902	4.30589	43.0725	10.3098	11.8464	3.59194	30.0872	3.63433	2.75909	1.4865	8.24038	4.4998	1.84575	0.433002	4.5738	6.17157	2.86515	17.1711	2.05349	2.52274	5.78576	17.4077	0.499409
AC064801.1	0.168538	0.157734	0.183735	0.199825	0.0465102	0.53454	0.18359	0.323477	0.785529	0.795632	1.23232	0.240256	1.19588	1.10483	0.64843	0	0.493639	0.662083	0.935118	0.399494	0.711304	0.78223	0.346578	0.425121	0.508029	0.973558	0.207856	0.360841	0.319599	1.10865	0.495675	0.495657	0.249941	0.915721	0.57216	0.734399	3.04047	0.917107	0.397967	0.77194	0.792473	0.132229	0.266455	0.496663	1.29299	1.07325	0.245984	0.0485763	0.90745
AC079944.2	0.116817	0.320697	0.280171	0.443209	0.180528	1.21524	1.8324	1.81929	1.92897	0.735291	1.81342	1.43213	1.17551	1.32326	1.22847	2.22544	1.29395	1.46849	1.11111	1.93037	0.887434	1.05725	1.79364	1.32597	0.9077	0.899723	2.2129	1.05045	2.30381	1.52222	1.44921	1.47414	1.35127	1.90411	1.26904	1.62888	1.24759	0.864504	1.71633	1.01659	1.34756	1.06315	1.30018	1.10159	1.69463	1.30358	1.2003	1.42757	1.47359
TLR8	0.0945483	0.0737395	0.287748	0.0700627	0.0304405	0.359848	7.98194	0.1253	2.91686	0.533133	0.819839	0.140398	1.67719	0.0454519	0.535542	0.557806	0.545464	0.288885	0.341402	1.64883	0.25494	0.836511	0.702099	1.26201	0.385278	1.03163	0.629671	16.5148	0.836699	0.898367	0.231725	0.572972	0.969822	0.299666	0.423107	0.553615	1.14281	2.86399	2.369	0.144351	0.484089	1.34141	0.672656	0.325062	0.318719	0.24848	0.924569	0.345178	0.745428
AL121994.1	0	0.0532319	0	0	0	0	0.185874	0	0.454457	0.201382	0.0479865	0.121622	0.110068	0	0.109416	0.10982	0.0454344	0	0	0.115561	0.180038	0.0494975	0.0584814	0.0538011	0.285749	0.109519	0.294618	0.0913324	0.323574	0	0.136866	0.0912404	0.316312	0	0	0.0464708	0.123132	0.278554	0.0447686	0	0.106977	0.133874	0.107908	0.0838068	0	0	0.199235	0.0491805	0.0656241
AL158032.1	0	0	0	0	0	0	0.704918	0	0	0.509155	0	0.230623	0	0	0.207477	0.416489	0	0	0	0.876518	0.45519	0.375434	0	0	0.650213	0.623016	0	0	0	0.202705	0	0.173013	0	0	0.199716	0.528715	0	0.352134	0.169783	0.185247	0.202853	0	0	0.317833	0	0	0	0	0.995505
H3F3AP6	0.0417243	0.0520662	0	0.0494701	0.0460576	2.64669	5.81772	5.21678	7.77884	4.13642	3.98954	3.09293	2.4223	3.01964	2.46146	5.90786	3.28852	4.15238	4.18912	4.80379	4.63718	2.66275	3.43205	5.42017	1.62105	2.99937	3.78733	2.23331	4.43084	3.45043	2.76662	3.16811	2.04195	3.62724	5.25385	9.95425	2.58936	3.63272	6.04277	3.58325	1.88342	4.38656	3.06079	3.03295	1.70721	3.49208	3.94617	1.44311	6.41871
MT1P3	0	0.362699	0.211243	0.114871	0.641683	0.368742	3.79939	0.212518	2.83843	1.37213	0.653918	4.00529	0.249985	0.406476	0.497008	0.498845	0.41276	2.53736	1.02392	0.39369	3.68009	0.112418	0.929755	0.366577	1.42778	0.621843	0.669132	0.829731	4.40938	2.0637	0.414463	0.51806	1.58049	1.05282	1.31565	0.844351	0.838965	0.843531	1.22013	0.443756	0.607413	0.76013	1.10285	3.23579	1.44153	1.05766	0.565625	0.335094	1.49045
RPL3P7	0.0848945	0.353122	0.0771248	0.218085	0.296752	1.40013	3.45247	2.07942	3.76839	1.38043	2.16462	2.09768	0.766663	1.02399	1.23391	2.8412	1.23573	1.85278	3.09535	0.766592	2.24928	1.3134	1.22203	2.65889	1.34585	2.05239	2.10796	1.42379	3.38071	2.03876	1.31648	1.22565	2.43404	1.94754	1.60696	2.99024	1.49069	5.23553	1.26216	2.44643	0.816099	2.59761	1.55691	2.36277	1.42101	0.995412	1.42078	0.880866	4.17915
NDUFB1P1	0	0.118885	0.103861	0.33887	0.21033	1.20866	4.98142	1.25386	2.79112	1.94893	1.82189	5.83989	0.860366	1.99851	1.09963	3.43372	1.31911	0.499015	1.91303	2.45182	1.47431	1.10544	0.914259	2.1628	2.80796	2.56821	2.53792	1.22385	3.97457	0.716225	1.32455	1.12074	1.27158	1.38037	1.0585	2.90598	0.687485	2.69578	2.09965	0.872721	1.91133	1.34543	3.4944	1.12301	0.88594	0.115559	1.1124	0.549182	1.75873
AL133264.2	0.184726	0.115256	0.134255	0.146012	0.20391	0.312471	4.15864	0.236365	3.44392	1.30808	2.28578	0.570554	2.58176	0.0968756	1.02658	0.87186	0.262329	0.967569	0.520602	0.875731	0	0.071447	0.379867	0.970738	1.56736	0.988027	1.03279	2.27413	1.16766	0.231455	0.296337	1.38286	0.730529	0.390319	0.190035	1.3751	1.0664	3.75273	2.29405	0.458296	1.08091	2.60873	1.83017	1.08874	2.20451	1.71783	0.323533	0.638904	0.284175
RBBP4P2	0.122103	0.0846488	0.103533	0.080428	0.059904	0.327025	0.532035	0.639825	0.686539	0.661821	0.534154	0.502846	0.210035	0.811103	0.330585	0.663614	0.606895	0.852747	0.458822	0.661549	0.687106	0.472262	0.688174	0.461991	0.327164	0.487635	0.30787	0.275948	0.720362	0.645963	0.536851	0.536831	0.261558	0.884569	0.703431	0.975446	0.450346	0.502014	0.669191	0.357305	0.23816	0.510923	0.188753	0.479767	0.466801	0.658249	0.348504	0.172054	0.417419
SAA1	0.0448332	0.0559457	0.342131	0	0.148468	1.08068	249.852	4.2287	414.459	13.0517	0.554762	230.847	71.9237	0.587797	101.885	75.8881	4.03493	1.76123	0.497507	261.638	38.4739	1.01441	1.25999	2.00731	1.89199	5.03571	15.1944	206.951	2.29547	6.85329	16.0625	79.6861	514.98	5.23726	1.49435	1.221	4.23814	1132.57	0.541085	1.10373	169.546	389.454	1.2475	42.4982	0.125074	33.9608	111.999	5.2463	1.27594
AL929410.2	0	0	0	0	0	0.11511	0	0.0995126	0	0.285558	0.102067	0.517377	0.117057	0	0.116363	0.233586	0.0966383	0.475252	0.191783	0.122898	0	0.10528	0.124389	0.114434	0.121557	0.116472	0.0895211	0.0971312	0	0	0	0.194067	0.134558	0	0	0	0.130949	0	0.380888	0.207791	0.113769	0.284747	0	0.178256	0.253126	0	0	0	0.139581
ANKUB1	0.0131126	0.0130902	0.011436	0.00310938	0.0115795	0.0199625	0.0914162	0.0201338	0.181602	0.19396	0.103253	0	1.48867	0.0330079	0.188344	0.0742661	0.0167591	0.123628	0.0110864	1.16156	0.00737882	0.0273867	0.0323575	0.0396905	0.0843219	0.0841613	0.043987	0.190905	0.0696236	0.45346	0.0476801	0.0701152	0.0544489	0.00474969	0.0291374	0.162843	0.170321	0.753489	0.432103	0.0180176	0.167705	0.164604	0.046437	0.0206089	0.504819	0.426256	0.00918633	0.0241878	0.020172
C2CD4D	0.673455	2.21665	0.542656	0.613322	0.851134	0.0742941	0	0.0535227	0.0519897	0.0767934	0.0878342	0.027827	0.0377752	0.0818968	0.112654	0.100507	0.0415814	0.613473	0.0825201	0.304063	0.109847	0.1812	0.0401415	0.0615482	0.24844	0.300693	0.192595	0.292555	0.11105	0.0489169	0.146135	0.229633	0.0578976	0.0530305	0.21688	0.0850599	0.0563448	0.616085	0.051215	0.078232	0.0489526	0.0306302	0.790053	0.364323	0.136143	0.130226	0.0227924	0.135029	0.315309
CAMKK2	46.327	9.25313	52.9131	35.2931	40.6779	10.5436	4.02121	7.90468	3.822	5.08868	6.9052	7.27986	4.97951	7.02232	8.24365	6.19764	7.25737	8.19044	7.06792	7.81519	4.91829	7.68818	7.08915	9.30527	7.3951	8.2228	5.2289	6.04952	6.83133	5.89328	8.17639	7.12828	5.35343	3.80442	7.30303	6.13455	7.32378	6.274	6.75633	12.8226	5.52219	5.15965	8.24892	5.11844	4.67295	7.70084	5.80096	7.56763	6.34115
ABCG4	4.42732	0.743905	3.80996	3.40437	4.20793	0.402435	0.0476615	0.116968	0.0873984	0.180733	0.218407	0.17932	0.0987822	1.38248	0.252506	0.0704	0.265043	0.644557	0.604019	0.385215	0.0730946	0.177689	0.408633	0.237974	0.355366	0.382625	0.264409	0.24883	0.331881	0.0822328	0.543971	0.260277	0.117607	0.316971	0.391598	0.0804328	0.449918	0.535698	0.100445	0.306865	0.216019	0.0729463	1.14828	0.128938	0.378901	0.517446	0.102175	0.775563	0.260822
YBX3	1.41213	1.35702	1.80436	4.21994	2.74161	11.0523	15.2827	8.93211	7.26205	15.9686	8.60347	13.6682	10.5659	11.6276	14.0768	14.7159	8.05681	10.6619	11.4908	16.2297	12.9592	16.7296	21.0439	9.29679	11.2763	9.72059	18.0553	15.3003	12.1994	17.2343	12.5952	13.0313	20.871	14.8401	10.9808	11.7121	6.87006	6.23838	4.30798	7.99589	11.1483	19.4423	3.81391	14.4739	15.0875	6.82001	14.5208	16.7074	7.1452
PXDN	1.28116	0.830724	0.996449	1.57319	1.19057	7.45421	11.5763	10.571	4.59691	1.56057	5.43228	10.3739	3.6614	29.4748	13.1561	17.8246	4.07738	9.74269	6.67656	8.15044	2.28456	12.7109	17.6222	10.7228	7.48391	3.72526	17.7762	7.81638	6.66157	2.29431	16.3507	10.0307	6.89952	4.51098	10.2286	2.15572	13.352	0.795798	3.60355	6.68263	5.8775	0.862931	2.30632	3.49563	2.91116	6.09959	13.015	15.8839	3.12624
AC025198.1	0.0409277	0.102144	0.0446182	0.194102	0.0451782	0.0519231	0.71333	0.269325	0.763032	0.515231	0.598515	0.291719	0.264006	0.343419	0.31493	0.210729	0.348728	0	0.302779	0.221745	0.633355	0.284935	0.561087	0.567801	0.383817	0.4203	0.726851	0.175254	0.155223	0.461529	0.262625	0.175077	0.242783	0.444748	0.2021	0.713366	0.177204	0.44542	0.472474	0.234322	0.307911	0.192663	0.362353	0.24122	0.456713	0.297862	0.143364	0.37748	0.503692
IGLC2	0.111355	0	0.485586	0	0.655572	0.329633	122.595	0.244258	45.6729	46.9612	0.250527	2.06363	4.59713	0	6.71202	2.00672	0.158136	13.8039	0.313826	21.3172	1.87987	1.80891	1.42482	0.702209	1.64101	34.8781	2.3072	9.01996	3.66017	2.04636	0.39697	0.238173	0.110093	0.60503	0.0916447	0.970456	2.19638	355.569	3.81754	0.170011	3.63028	1.33961	2.72291	0.0729228	1.38068	0.135069	0.650102	0.727487	0.114203
CLEC10A	0.0625104	0.0260015	0.189298	0.107055	0.0690024	0.16742	8.29228	0.0914113	1.79436	0.185803	0.0859443	0.138617	0.259857	0.138414	0.302855	0.178809	0.236723	0.145521	0.271595	0.780843	0.635127	1.95031	0.219003	0.0788385	0.0558304	1.02532	1.28147	13.0713	0.052684	0.226268	0.0445686	0.10399	0.29871	0.402536	0.137189	0.068097	0.250602	1.36062	0.123916	0.397655	0.470284	0.305161	0.0702776	0.122808	0.161471	0.185344	0.713664	0.0960901	0.0747939
RASGRF2-AS1	0.779486	1.08281	0.753574	0.435939	0.941612	0.0559755	0.19225	0.064521	0.195853	0.0694302	0.165442	0.0209657	0.09487	0.138833	0.0754463	0.0378626	0.0783218	0.15407	0.108803	0.0199209	0.0206904	0.0853258	0.0806502	0.0370978	0.236441	0.207672	0.0580428	0.0472328	0.334674	0.0368555	0.0471869	0.110099	0.0218109	0	0.0544681	0.048065	0.0424519	0.224085	0.0154348	0.0336813	0.0368824	0	0.24182	0.115576	0.0136766	0.0178393	0	0.0339117	0.316752
TMEM132D	9.01189	1.34839	9.77181	8.24008	7.0099	0.269877	0.0526651	0	0.025753	0.201609	0.0571049	0.0206761	0.0062373	0.223121	0.00620034	0.024893	0.157054	1.10157	0.365331	0.0163714	0.00340077	0.0028049	0.08285	0.128049	0.330331	0.257555	0.0357756	0.0698704	0.220034	0.00908659	0.0646321	0.201645	0.00716987	0.170746	0.0656525	0.0105336	0.320968	0.368316	0.0202954	0.476097	0.0121243	0.0113794	1.10985	0.156721	0.0134877	0.167133	0	0.23689	0.0520626
AC022092.1	0	0	0	0	0	0.0431663	0.148257	0	0.0906209	0.0535421	0.038275	0	0.0438962	0	0.174544	0.262785	0.0362394	0.17822	0	0.460868	0.0478672	0	0	0.128738	0	0.174708	0.0335704	0.182121	0	0.383692	0	0	0.0504594	0.0616234	0.0840077	0.111198	0.294636	0.66654	0	0.0779215	0	0.21356	0.0430345	0.133692	0.0316407	0.123814	0.198642	0.274591	0.104686
MDM2	3.28814	5.54126	3.25646	3.45738	3.12475	8.69871	10.7919	6.30566	5.63298	9.16314	5.00686	8.59195	5.30382	521.851	5.30884	10.5638	5.08047	12.1744	3.72219	9.76499	6.44886	10.6064	6.43311	6.35496	4.39302	5.61899	8.72807	14.4298	9.4963	5.31625	7.35092	4.79589	5.52201	4.50909	290.762	7.29066	5.38883	6.18964	10.5069	4.09945	5.19376	18.5378	4.0493	6.17559	7.21954	3.43047	4.92394	8.21178	7.54478
Z96811.1	0.158784	0	0.173102	0	0.175274	1.61154	2.07559	2.26391	1.69159	0.999452	1.60755	2.48988	1.63879	1.33234	0.40727	1.22633	1.52205	3.32676	2.68496	1.07536	3.79746	1.10544	1.0884	0.400519	1.48907	1.01913	4.07321	1.18986	6.62428	2.78532	1.1887	2.0377	1.41286	2.01303	0.98009	1.90272	2.29162	1.03684	0.999831	0.909084	1.19458	1.49492	1.60662	2.18363	1.77188	0.962994	1.1124	1.28142	3.17548
UBE2SP1	0.256333	0.255895	0.503006	0.182352	0.31125	2.56907	1.78706	4.30135	2.86736	1.12942	2.45097	3.43487	0.760605	4.57058	1.5122	2.30968	3.8495	5.50483	0.541808	3.88865	8.11381	1.90354	1.6165	1.35781	1.37364	4.50794	1.11279	0.548813	2.236	2.28036	3.1252	2.85096	0.722271	2.55336	7.72117	4.10485	1.70176	1.45065	2.1252	1.8785	2.69986	1.00555	1.62103	1.30934	2.81276	1.92772	2.72363	0.975228	5.95443
CAMK1G	32.1058	4.17429	36.1116	27.9758	26.145	1.7642	0.418841	1.3143	0.238947	1.18993	0.266723	0.191841	0.0826745	1.84167	0.139714	0.346452	1.52888	0.369226	2.30268	0.19964	0.279476	2.40917	1.0191	0.598085	3.14221	3.06013	0.252907	0.384169	2.64917	0.192706	0.548281	0.561967	1.78667	2.0659	1.06799	0.558483	4.06942	3.7661	0.114331	1.29881	0.393729	0.261444	7.99169	2.00178	0.220492	1.89662	0.628529	1.92829	0.502775
AL590286.1	0	0	0	0	0	0	0	0.129264	0.313903	0.370931	0.132581	0.0840071	0.0760264	0.123619	0.151152	0.151711	0.0627651	0.617338	0.18684	0.0798204	0.248712	0.068378	0	0.222969	0.157898	0	0.290713	0.0630852	0.2235	0	0.189072	0.0630217	0.0873936	0	0.0727489	0.385181	0.255149	0	0.247381	0.0674784	0.0738915	0.0924695	0.0745341	0.231549	0	0.28592	0.068808	0.06794	0.45328
PARPBP	0.245756	0.157845	0.212757	0.175684	0.203459	1.59558	1.05507	1.79557	1.89622	3.7876	1.42698	1.25708	0.862568	2.47908	1.12628	1.20023	1.86688	2.70698	0.282642	3.96022	2.30319	1.24965	3.4038	1.1851	0.610063	2.63509	0.591915	0.371412	0.932057	1.26339	1.45328	1.059	0.348377	1.48582	2.48507	2.88979	0.844976	0.739445	1.72953	1.72981	1.12837	1.84306	0.356538	0.575114	1.17963	0.951264	1.26595	0.987485	1.59008
DLGAP2	6.21511	0.657523	6.3032	5.04495	4.22391	0.197322	0.0345772	0.00696266	0.0422702	0.0649343	0.00357068	0.0678743	0.0307131	0.186441	0.0264603	0.0245152	0.182562	0.0332522	0.347206	0.0279464	0.00223277	0.0294649	0.139251	0.0880735	0.265782	0.25059	0.00469768	0.0951445	0.126405	0.00994297	0.0967496	0.183308	0.0164758	0.166717	0.0509411	0.0674289	0.201569	0.207272	0.0582965	0.00545198	0.137313	0.0199231	0.447639	0.124721	0.256804	0.383094	0.0500347	0.15187	0.0659217
BORA	0.225853	0.476433	0.375191	0.318787	0.32054	1.55545	1.12469	1.68085	1.66135	2.20011	1.82078	0.889227	0.763125	3.11903	0.875842	1.75816	1.84422	2.50681	0.602411	2.48374	1.32389	1.27911	2.9046	1.45136	0.72042	1.64288	0.631364	0.834707	1.26446	1.38798	0.839649	0.552077	0.741653	1.72383	1.57994	1.27705	1.12533	0.585234	1.18512	1.17608	0.937234	1.04631	0.584914	0.623308	0.850102	1.51977	1.45041	1.32672	1.32359
AC004925.1	1.48293	41.0745	1.13303	5.2446	3.95242	0.50651	0.441811	0.444828	0.303811	0.289198	2.45231	0.487837	0.261625	0.0531754	0.585169	0.424185	0.128244	0.829847	0.274598	0.377687	0.151562	0.139712	0.608155	0.295727	1.04428	1.19584	0.80033	1.74352	0.913325	0.635233	0.589645	1.42323	0.855236	0.183641	0.265993	0.593714	0.173777	0.634518	0.332538	0.203183	0.580073	0.298322	1.80344	4.44473	0.35359	0.630324	0.0517967	0.336085	1.31612
CDC14C	0.0399039	0.0248973	0.0108755	0.0118279	0.022024	0.0379682	0.0869358	0.0218823	0.318834	0.0156982	0.11222	0.0284422	0.592024	0.0941706	0.895568	0.179776	0.0743761	0.0522529	0	0.554006	0.0140343	0.0694519	1.35395	0.21389	0.0801892	0.281728	0.0295279	0.0427174	0.113505	0.0624979	0.0746829	0.224041	0.0295888	0.126473	0.197044	0.0869402	0.374337	0.0651418	0.408308	1.09661	0.0375261	0.0469609	0.302819	0.0391976	0.0742148	1.06484	0.0232963	0.0345036	0.2302
AC008026.2	0.0492779	0.061492	0.0537214	0	0.0543956	0.812716	2.14716	0.594502	0.65622	0.697893	0.60976	0.77272	0.445017	0.46517	0.0631971	1.77606	0.787269	0.774333	0.416632	0.73421	1.73312	0.343069	0.337781	0.186449	0.528142	0.759077	0.680669	0.580275	0.373784	0.86441	0.579712	0.63239	0.438475	0.892477	1.03416	1.07364	0.568953	0.429037	0.775731	0.620685	0.308943	0.541265	0.747911	1.7426	0.274947	0.777037	0.863066	0.454495	1.59195
HS3ST5	1.17417	5.18295	0.751628	2.17491	1.65127	0.153732	0.327725	0.0274969	0.0779022	0.387945	0.43244	0.0893497	0.334227	0.135863	0.310811	0.129087	0.863387	0.415846	0.216387	0.118855	0.135204	0.208483	0.189039	0.23188	0.5598	0.455927	0.420513	0.594929	0.206018	0.848162	0.0625633	0.36196	0.254067	0.196763	0.526153	0.168423	0.192978	0.418374	0.0745488	0.100478	0.0733514	0.0327834	0.4915	0.755241	0.369142	0.233146	0.375678	0.211965	0.578528
RPL10P4	0.0556776	0	0	0.0660137	0.0614599	0.353179	1.94081	0.488516	0.889732	1.2266	0.375791	0.714333	0.14366	0.233592	0.571236	0.860022	0.415106	0.291632	0.588424	0.226244	0.861609	0.516831	0.534307	0.77243	0.149183	1.0006	0.659201	0.238413	1.47815	0.767384	0.297727	0.654976	0.990839	1.10922	0.687335	0.849149	0.723198	0.484756	0.233727	0.573786	0.279252	0.698925	0.915462	0.546921	0.310654	0.135069	0.845132	0.19257	1.54174
LINC00951	1.57867	0.772535	1.85601	2.12864	2.28933	0.196352	0	0.305543	0.329768	0.681936	0.557129	0.220632	0.119803	0.876602	0.516072	0	0.362655	0.648539	0.621563	0.503128	0	0.287336	1.57013	1.32735	0.912333	0.794701	0.51919	0.331368	0.234796	0.0387848	0.231733	0.496552	0.0459053	0.280309	0.458554	0.0674414	0.536089	0.134752	0.552253	0.106333	0.970326	0	1.01791	0.547316	1.03626	0.337917	0.397571	0.46393	0.523808
MYRIP	15.5191	7.63477	16.3645	11.8316	9.35844	0.892906	0.343575	0.663016	2.03786	0.588233	0.775303	1.09491	3.18367	1.39065	3.58054	0.466138	0.684302	3.51826	2.80864	0.866293	0.414957	3.0362	3.65134	0.924496	2.817	2.19682	0.685769	0.919141	3.17882	3.81653	1.38674	2.72654	0.506725	0.9309	1.48536	1.84522	1.40354	1.84979	3.09859	0.501606	1.02898	2.2821	2.31595	2.75398	0.399216	4.94866	0.228466	0.949471	1.17258
COL6A2	4.11047	3.16657	5.13367	6.99132	3.43377	23.9572	142.215	26.1865	40.1186	25.2316	18.5241	10.6889	9.75973	18.3439	70.9635	91.2137	19.5228	42.1763	3.89995	44.1396	58.6105	29.1081	58.8	15.9379	3.30153	9.64969	80.677	67.8175	24.3562	11.5612	87.0894	117.84	73.8723	9.6646	18.4225	7.67923	88.8609	24.4429	1.90128	15.48	15.8573	7.41411	3.48335	59.08	9.16666	13.5208	74.9734	37.0156	5.81888
TMSB4XP1	0.635137	0.158513	1.24634	1.20487	1.26198	16.4377	60.884	21.037	57.8524	27.1851	18.2903	16.1163	11.4715	9.19314	10.1003	32.048	14.8823	7.98424	5.36992	17.2057	12.688	7.95919	12.1901	9.45226	6.80717	21.361	21.8073	12.5105	33.7236	20.2135	10.7323	11.1394	10.1726	14.4938	10.1929	35.702	14.6663	34.5613	21.863	4.79997	13.6978	32.2903	17.0302	15.223	21.8532	8.16619	12.4588	9.95849	19.1506
LINC01146	0.0488741	0	0.046621	0.036217	0.0539498	0.193764	1.2245	0.020101	0.439319	0.13459	0.288637	0.104508	0.275857	0.0961164	0.501434	0.2831	0.0910955	0.351995	0.0129131	0.206873	0.0085946	0.113419	0.159131	0.400662	0.343754	0.290164	0.235076	0.909061	0.579252	0.107166	0.111072	0.196003	0.362401	0	0.045251	0.159726	0.255694	0.305844	0.211578	0.062959	0.145545	0.440968	0.0386345	0.0240045	0.0568112	0.0741029	0.185465	0.197212	0.206761
PPDPFL	0.0333146	0.0831441	0	0	0.00919361	0	0.0725802	0.0639413	0.133093	3.23718	0.224854	0.0949823	0.150428	0.0349423	0.18158	0.321621	0.0177413	2.79196	0.0176041	5.9	0.257771	0.115967	0.650822	0.136554	0.0223159	0.0320737	0.0821733	0.0356635	1.67413	0.240017	0.0801651	0.187045	0.0370542	0.618449	0.298168	0.834714	0.396664	0.688877	0.201035	0.610354	0.073102	0.0784127	0.010534	0.310887	3.77955	3.17213	0.136146	0.019204	28.7896
MATN4	0.0973173	0.0346967	0.0682024	0.024725	0.0690583	0.00881872	0.151442	0.1601	0.0370271	0.185954	0.42225	0.089183	0.394585	0.575979	0.169379	0.322116	0.0222108	0.655374	0.00734636	0.235384	0.752991	0.0403283	0.933901	0.245474	0.270066	1.01723	0.0342916	0.022324	0.31636	0.130645	0.193287	0.557539	0.422656	0.0629473	7.31122	0.454348	0.321031	0.0302604	0.0291803	0.342261	0.252765	0.0109074	0.114294	0.109251	0.0646409	0.227652	0.0730475	0.088154	1.11213
CALCRL	1.7305	2.35447	1.52749	1.86974	1.40494	3.17626	9.08477	14.0753	10.5559	17.0283	4.09423	13.2735	16.1715	2.67574	20.4784	6.96995	16.0262	7.93843	28.5303	16.4605	2.15571	12.8281	4.25498	19.5934	5.88938	8.13673	9.60533	4.39225	8.07687	2.25569	2.45668	4.92511	2.49596	1.24354	6.59838	3.94058	31.7022	8.33522	16.0432	29.6205	6.15605	12.2543	2.34051	4.95156	2.15169	4.74312	9.80625	2.80598	13.272
COL15A1	0.451078	0.147958	0.266952	0.433966	0.304445	0.755387	5.79531	2.84394	3.40505	0.567853	1.15401	0.124931	0.169594	0.535299	1.5768	2.86666	0.304731	0.904572	0.291479	1.57458	0.446022	2.52127	2.40997	0.497383	0.186473	0.393743	2.594	5.99602	0.782064	0.568416	1.1385	0.931714	0.844787	2.24545	0.547306	0.115126	2.11299	0.476887	0.121729	1.08024	0.749822	1.12035	0.267328	0.430434	0.711894	0.203223	3.5604	1.2273	0.396526
AC104083.1	10.9384	3.51062	15.1276	6.14243	13.0227	2.95346	2.5431	1.87719	2.04349	0.598525	2.28684	1.31812	2.18276	1.12803	2.481	1.75578	1.06864	5.3241	2.63362	4.07707	0.276769	1.4077	1.42046	1.93536	2.19639	4.12485	1.37167	1.86737	2.18867	0.279369	1.50086	1.78835	0.875273	0.3088	1.15767	1.14302	4.2022	1.21328	0.578105	0.713362	1.29097	1.42003	1.61738	1.08221	0.38419	0.684076	1.75346	2.16228	1.5536
KCNH8	1.59549	21.6463	0.784535	4.14383	3.72866	0.116776	0.255229	0.0428286	0.20058	0.377477	0.523996	0.0477151	0.698113	1.16439	1.41299	0.150798	0.196075	3.95933	3.2456	1.81349	0.0588607	2.34322	2.07639	7.53182	2.07769	1.53606	0.140354	0.647957	0.200997	0.0279594	1.6049	1.03211	0.0992773	0.197019	1.1742	0.209663	1.00238	0.151782	0.117092	1.56821	1.08771	0.0525217	1.1889	1.29873	0.153036	0.277433	0.156329	0.215456	1.63057
CCRL2	0.16807	0.139819	0.250407	0.491533	0.674071	1.70578	10.1793	0.546848	3.22292	1.38408	1.62593	1.34969	1.30097	0.605233	1.14238	1.51438	1.04421	0.997703	0.645364	1.78325	0.433479	1.02708	1.35174	1.86534	1.7863	2.06397	1.44266	5.3736	2.33722	0.73705	0.563201	1.95316	1.55364	0.304393	1.13423	3.85099	1.30175	1.99984	1.78147	0.654327	0.976425	1.92518	3.88298	0.880505	1.36494	0.496063	1.56339	1.69868	1.50822
LINC00940	0.10946	8.81466	0.111375	0.38934	0.402759	0.0648045	0.0317963	0	0.0388706	0.0688984	0.147758	0.0728181	0.028243	0.0229616	0.00935855	0.0375726	0.0310888	0.114667	0.131106	0.0395366	0.010266	0.0508034	0.0800324	0.128848	0.107539	0.252918	0.00719978	0.281226	0	0.0182866	0.0156085	0.257531	0.0108219	0.0132163	0.0720679	0.0317979	0.0737218	0.285903	0.0765828	0.116982	0.0365999	0.0114505	0.784511	0.602125	0.0475015	0.0531081	0	0.042065	0.875621
RPS6P25	0.320965	0.743823	0.174954	0.299003	0.430219	2.70493	5.39432	1.35779	4.39633	4.94248	1.77948	2.09164	1.0352	1.73133	2.38155	2.65595	2.75923	1.68117	2.27755	1.70792	2.28994	2.47395	2.54582	4.48175	1.65857	2.61922	2.1941	1.17804	4.95613	3.64815	1.86342	2.28016	2.85595	4.06912	2.17926	5.66932	1.75364	3.24359	1.25113	2.57266	1.20736	5.36014	2.08775	1.80162	1.72687	1.47385	1.65967	1.29513	3.0331
AL583785.1	0.0334935	0.0417953	0.0730275	0.0397113	0	0	0.29188	0.257139	2.23012	0.0527055	1.80849	0.0954924	2.16052	0.10539	0.90204	0.258679	0.0356731	0.175435	0.318577	2.0415	0	0	0.688756	0.253454	2.28844	1.84877	0.0330459	0.0358551	1.27028	1.34292	0.214922	0.071638	0.546381	0	0.248085	4.12301	0.338371	0.729028	1.15996	2.91475	0.965929	2.31246	6.10015	0.131603	0.218024	0.853153	0	0.0386143	0.257626
RPL39P38	0.448332	0.559457	0.12219	0	0.247446	0.710974	2.44187	2.21269	3.88071	2.46923	2.64773	1.438	1.15679	1.64583	1.43742	3.17403	0.477507	3.52246	2.25063	1.9736	1.5768	1.43057	0.768285	1.55496	0.900949	2.87755	2.65404	0.959885	3.82579	3.23004	0.719216	1.55824	0.831096	3.04492	0.553462	3.90719	1.13233	2.19566	0.941017	2.69517	1.54593	4.04509	1.55937	1.32119	0.833826	1.35952	1.04696	0.387658	2.06909
AL359704.1	0	0	0	0	0	0.334276	0.478369	0.40939	0.818721	1.20932	0.246999	0.406913	0.141637	0.299392	0.168957	0.847909	0.37418	0.23002	0.278466	0.475856	0.926699	0.611462	0.541833	0.609241	0.235331	0.450975	0.259966	0.094022	0.999309	0.220095	0.234827	0.0704455	0.390753	0.278371	0.243956	1.07639	0.126758	0.621307	0.207391	0.301709	0.192723	0.861351	0.41657	0.258825	0.14293	0.133167	0.256378	0.177201	0.60801
AC090912.1	0.0300854	0	0.131193	0.0713411	0	0.229008	0.13109	0.329963	0.560896	0.0946849	0.507647	0.128663	0.388135	0.189332	0.308668	0.309809	0.352476	0.315167	0.0635911	0.489005	0.0423246	0.139635	0.164979	0.227664	0.120917	0.154479	0.0890499	0	0.114102	0.640833	0.128702	0.160871	0.312317	0.217952	0.371402	0.262193	0.0868402	0.0654846	0.284162	0.137798	0.113171	0.424873	0	0.177317	0.531564	0.218954	0.175642	0.242796	0.370258
AC108059.2	0.113568	0	0	0	0	0.144078	0	0	1.81482	1.42968	0	0	0.146514	0.119116	0.145646	0	0.362874	0.594852	0.360069	0	0.639074	0.131775	0.311385	0.71616	0.152147	0.291566	0.11205	0.121575	0.430718	0	0.121457	0.242905	0.673683	0	0.280396	0.494868	0	0.247194	0.119185	0.130041	0.427201	0.178203	0.143639	0	0	0.137753	0	0	0.349416
AC008753.1	0	0.226048	0.0658276	0.0715923	0	1.5321	3.94655	1.25827	1.92984	2.37546	1.42642	2.23802	0.701103	1.39333	0.851826	1.2436	1.41487	2.53022	1.65919	2.04469	3.31295	0.910823	0.49668	1.67541	0.808951	1.31769	0.834059	0.711042	3.43513	2.64802	0.710352	1.35608	1.43276	1.74976	1.4163	1.84181	1.30719	1.57716	0.823805	2.90395	1.74139	2.46346	1.0692	2.01667	1.06687	0.512693	1.7626	1.18345	1.85781
TPM3P8	0	0.0665605	0.0872242	0.0316208	0.0294396	0.236844	0.813451	0.585004	0.639279	0.419677	0.570017	0.418206	0.275256	0.251756	0.342031	0.961228	0.596513	0.838159	0.33823	0.54186	0.487754	0.340401	0.402185	0.302725	0.285838	0.239646	0.657834	0.656655	1.61837	0.93566	0.399316	0.285215	0.474616	0.579624	0.592626	0.958759	0.61585	0.580501	0.531792	0.274846	0.167204	0.460334	0.134926	0.419164	0.421614	0.808735	0.249121	0.46121	0.492334
CENPH	0.733634	0.839185	0.81645	0.64331	0.801389	5.28383	1.56502	6.29444	4.13173	4.00449	7.09213	4.55368	6.55626	15.9988	5.23353	7.45634	7.61027	13.3293	2.44715	10.2889	8.71899	4.30059	11.5871	6.41902	5.09855	9.70191	2.07347	1.00624	3.07222	8.74216	6.88159	2.43544	1.75663	5.27325	14.3963	10.1232	3.65065	1.3307	9.80048	5.87162	5.0594	2.50619	2.95765	2.40216	7.36941	6.12711	5.49655	2.56383	11.815
MNX1	0	0	0	0.0048387	0	0.0155325	0.0177823	0.134278	0.0217387	0.0963298	0	0.0174532	0.0157951	1.02731	0.680399	0.0210128	0.530292	2.11624	0.0603828	0.668861	0.114826	0.322005	0.727329	0.473532	0.420993	1.08442	0.0201326	0.00436882	0.0619118	0.00511346	0.0392813	0.00872885	0.0786792	0.00739129	1.34012	0.0400122	0.294496	0.0266489	0.33407	1.12621	0.133047	0	0.0206467	0.120265	0.0265655	0.163356	0.33356	0	0.232292
RPS7P1	1.31913	2.12163	1.56591	1.7378	1.65028	18.8922	46.4933	21.2513	55.9786	56.3229	15.3995	22.3984	10.9295	13.1287	12.2181	21.8098	19.2637	18.1181	18.4333	28.7468	48.0851	14.5578	17.3207	18.5594	13.6667	42.1826	18.4234	8.0335	27.3495	18.3648	12.1953	9.81232	11.4768	20.4931	21.8213	64.5063	11.9728	36.0501	19.9659	31.0152	17.496	43.8817	24.2847	17.7954	13.1119	14.2582	15.4366	11.254	39.9997
AL138955.1	1.07179	1.17284	1.06058	1.32941	1.61994	0.0418381	0.215542	0.126591	0.219581	0.129737	0.222584	0.0235058	0.170182	0.415075	0.253761	0.12735	0.122935	0.690944	0.400808	0.223344	0.115986	0.0765307	0.361685	0.0623886	0.331359	0.486831	0.0813437	0.123562	0.125074	0.0206604	0.0529038	0.105804	0.0244534	0.149318	0.183201	0.0898138	0.356963	0.251234	0.173048	0.226572	0.165403	0.232863	0.333683	0.35634	0.0613343	0.240008	0.0962651	0.266142	0.40586
DOCK3	28.1431	11.6981	27.9732	21.224	22.8432	2.62908	0.674241	0.794851	1.52852	0.964748	3.87134	1.72561	3.55798	4.98611	5.02401	0.529471	1.46868	4.73993	4.87295	4.22636	0.435381	2.51367	1.39097	2.66058	4.98058	2.6778	1.52865	2.43862	1.76803	2.15972	6.10425	3.21121	2.70437	1.07843	2.54619	1.84359	4.73222	2.06776	0.561184	1.45786	2.87108	1.65355	4.23135	2.72447	1.00363	3.83227	0.818764	2.76178	1.61509
AC116562.1	0	0.0547995	0	0	0	0.139282	1.05241	0.144491	0.701761	0.587386	0.123499	0.156505	0.11331	0.0690906	0.140798	0.452218	0.280635	0.23002	0.139233	0.386633	0.772249	0.127388	0.240815	0.138464	0.117666	0.225488	0.108319	0.094022	0.333103	0.110047	0.164379	0.0469637	0.162814	0.357905	0.298168	0.478394	0.190137	0.33455	0.0230435	0.226282	0.192723	0.447903	0.277713	0.0431374	0.102093	0.0799002	0.282016	0.151886	0.337783
AL353151.1	0	0	0	0	0.0313405	0.648351	1.73195	0.653917	1.43673	1.02758	0.255505	0.404736	0.0366286	0.148895	0.182058	0.950201	0.997903	0.148713	0.390075	0.730674	1.43792	0.527099	0.350307	0.286464	0.304294	0.583132	0.308136	0.24315	1.18447	0.498038	0.242914	0.425084	0.505262	0.822734	0.420595	1.2681	0.696591	1.05057	0.23837	0.325103	0.534001	0.66826	0.574554	0.613565	0.422435	0.206629	0.729319	0.229129	1.17928
PA2G4P1	0.0429792	0.0178774	0	0.016986	0.0158142	0.0727011	0.624238	0.219975	0.419718	0.180352	0.161158	0.142959	0.0924131	0.105185	0.183731	0.331939	0.183104	0.225119	0.21197	0.291074	0.241855	0.199479	0.157123	0.271028	0.230318	0.147123	0.212024	0.122692	0.652014	0.269258	0.18386	0.153211	0.127476	0.129734	0.247602	0.468202	0.124057	0.187099	0.300701	0.164045	0.233527	0.20232	0.0724792	0.309602	0.253126	0.243283	0.200733	0.115617	0.132235
CXCL13	0.0119837	0.014954	0.0783859	0.0284168	0	0.0608128	53.8348	0.0394295	3.31935	0.433724	0.175246	0.102499	0.231905	0.188538	10.0358	0.462765	0.0765813	0.125538	0.0506596	36.3593	0.421472	0.125145	0.213574	0.151139	0.20871	1.78444	0.0354706	1.75753	0.727194	0.180182	0.128162	0.102526	9.97001	0.151927	0.0443814	0.130547	0.415085	151.809	0.138341	0.315607	0.58602	1.24107	0.818468	0.0470864	0.0222878	0.75586	1.06342	0.0414477	0.682105
AL354863.1	0.894856	0.345149	0.957811	0.906655	1.50863	0.0825647	0	0	0.173332	0.281629	0.0366045	0	0.0209902	0.0341301	0	0.041886	0	0	0.10317	0	0	0	0	0.1026	0.435943	0.27151	0	0.0348345	0	0.0203859	0	0.0695989	0	0.353604	0.0401707	0.0708967	0	0.566622	0	0	0.122405	0	0.514455	0.0319643	0	0.177615	0	0.150061	0.175205
TMEM88B	2.61413	61.3705	1.40593	7.64524	11.504	0.265315	0.303745	0.114682	0.0928312	0.054848	2.15647	0.894368	0	0.402139	0.625805	0.358925	0.334109	3.65133	0.515709	0.236054	0	1.49639	0.66897	1.36274	1.40087	0.626393	0.206335	2.72382	0.132192	0.218361	0.782805	1.9383	0.310141	0.126253	0.430283	0.417671	0.754557	0.151733	0.109738	0.119733	0.131112	0	3.21814	2.80753	0.777898	0.338222	0.406974	0.40184	0.643436
RPL5P5	0.0192035	0	0.0209351	0.0227684	0.0211978	0.389802	1.67349	0.463352	0.920619	0.604372	0.280826	0.355878	0.322069	0.281984	0.369416	1.48313	0.368156	0.201171	0.608851	0.468196	0.270157	0.289668	0.236938	0.702366	0.463086	0.493017	0.53051	0.0822298	0.946807	0.216552	0.143763	0.246441	0.398703	0.591254	0.308185	1.2761	0.526584	0.668779	0.24184	0.395803	0.264868	0.632789	0.315747	0.716815	0.196435	0.302809	0.112112	0.110697	0.620379
KCNC1	14.1012	1.93728	11.5605	8.84189	10.5477	1.00357	0.394788	0.999444	0.134578	0.455146	0.252843	1.30651	1.18688	3.70075	0.945221	0.417166	1.46607	1.75228	1.23929	1.43256	0.33827	0.737936	2.94287	1.18666	1.65969	1.13175	0.139248	1.45303	1.65206	0.312193	1.45162	1.20747	1.22481	1.6662	4.79453	0.269533	1.50629	0.731961	0.934408	0.861903	0.710048	0.199586	1.43244	0.523737	0.348363	1.63582	1.10878	0.737227	1.79858
HMGN2P31	0.0628158	0	0	0.074477	0.0693394	0.398458	0.821113	0.688933	0.5019	1.4827	1.20124	0.179092	0.405196	0.988273	0.72503	0.646854	0.401421	0.987062	0.331932	1.61658	0.17674	0.364432	0.516693	0.396118	0.336618	1.37079	0.0619761	0	0	0.708355	0.403077	0.403062	0.0931558	0.91013	0.465273	0.889584	0.543944	0.683631	0.659229	0.28771	0.393817	0.985664	0.158897	0	0.233654	0.304772	0.293379	0.506937	0.773066
LAG3	0.0673378	0.0490165	0.0856448	0.146371	0.111497	0.505452	1.07583	0.166169	0.269016	0.512154	0.530239	0.591953	0.419887	1.3949	1.15864	0.433388	0.10758	1.08751	0.587115	0.623257	0.307879	1.29571	0.90007	0.396325	5.3827	0.705922	0.249142	1.92829	0.532055	0.344519	0.522114	0.450082	0.282942	0.254076	0.561114	0.16505	0.47782	0.720631	0.388678	0.385528	0.61918	0.176103	0.539396	0.451997	0.620969	0.347132	0.248979	0.317001	0.129487
AL080243.2	0.265186	0.625063	0.417587	0.279481	0.650504	6.28002	15.7916	8.07899	15.0674	11.9161	5.63471	11.635	2.54689	4.26486	3.58986	7.66139	9.5403	7.40805	5.07582	7.66276	22.011	5.81213	4.52417	7.35799	5.92119	12.5952	7.23875	3.97437	13.5217	6.4608	5.67216	6.99541	5.98646	7.52441	9.38461	15.0541	4.46511	10.8387	3.80348	5.80314	6.35467	14.0091	9.09315	9.14617	5.26084	3.71696	8.53219	3.397	14.9582
VSNL1	242.14	37.3942	265.472	214.902	242.604	12.5665	1.63751	0.475963	1.5133	14.4184	0.38249	1.35847	0.629137	15.2273	0.286885	2.14231	5.55135	2.62461	17.5986	1.38166	3.09037	0.648904	5.3545	4.16987	18.8445	27.6472	2.95749	0.622623	10.8595	3.09436	2.3541	4.11475	0.172507	11.2711	3.64523	1.46214	12.7783	45.6718	0.366231	0.158811	1.38001	1.71996	41.404	4.79909	0.112332	6.89195	0.114925	11.4765	7.92872
HNRNPA1P51	0	0	0.0197413	0.0429402	0	0.0689201	0.236709	0.218465	0.337604	0.0284955	0.101851	0.0258142	0.140171	0.0759729	0.116117	0.0932372	0.154295	0.189699	0.210515	0.0490554	0.152851	0.210116	0.173777	0.159869	0.0970399	0.209207	0.107198	0.0387704	0.0686783	0.0907572	0.154931	0.0968285	0.0537097	0.131186	0.134128	0.256448	0.104538	0	0.171038	0.0829407	0.0227058	0.0852438	0.0458066	0.177879	0.117876	0.131789	0.0422875	0.0626311	0.111429
PRRT1	33.3396	13.9213	37.1005	24.5647	42.1775	2.3793	0.929413	2.15401	2.50821	2.42557	1.26763	3.06365	3.42681	4.82906	2.7923	1.63702	2.98767	3.30959	4.93813	2.21866	2.83658	3.45098	2.27867	2.85768	5.50497	4.44294	1.95759	1.52946	3.55643	1.23041	3.07747	3.00849	1.61745	3.41852	2.40963	1.55202	2.65442	3.41639	4.02091	1.71892	4.59721	1.02304	12.0842	3.81102	2.20809	3.71981	2.14282	2.47306	2.9718
FANCC	0.444323	0.724847	0.347342	0.359771	0.337346	1.00915	0.878296	3.29471	1.11989	1.42566	3.02817	1.17101	1.88465	3.06445	1.95131	1.98643	2.50469	3.15605	0.590983	2.81833	1.11905	1.92391	2.9892	2.88392	1.33571	1.71944	1.03074	0.707676	1.57828	2.70757	2.71206	2.25069	1.34358	3.10896	3.04492	1.35293	1.57656	0.301931	3.34145	1.95568	1.53006	0.823039	1.05815	1.35408	1.9591	4.85577	2.12834	1.59424	2.23397
RPS26P31	0	0	0.0537214	0.0584259	0.0543956	0.7502	0.429433	1.08091	2.23115	1.39579	0.831491	1.61569	0.699312	0.258428	0.631971	1.26862	0.997208	1.54867	1.30197	1.53517	1.9411	0.228713	1.01334	0.994393	1.58443	0.822333	0.923765	0.263761	1.86892	1.04964	0.579712	0.737789	0.438475	0.446238	1.33833	3.38195	0.711191	2.68148	0.724016	0.564259	0.926829	3.01562	1.37117	0.387245	0.779016	0.119544	0.805528	0.568119	0.909686
LINC01096	0	0	0	0	0	0.0172119	0	0	0.0361337	0.0426981	0.0610462	0.0580207	0	0.0426897	0.0521976	0.0698541	0.0433496	1.56337	0	0.349151	0.209949	0.0157421	0.130195	0.598878	0.0908789	0.853361	0.0669283	0.0145236	0.102909	0.016999	0.159604	0.261161	0.0201199	0	0.0669935	0.029559	0.215383	0.561075	0.113905	0.357305	0.289194	0.0212885	0.0171593	0.0266537	0.164011	0.0658249	0.0316822	0.0156412	0.0626128
AC020899.1	0.0284862	0.0710937	0.12422	0.135098	0.0943338	0.542088	2.35831	1.34342	1.51737	2.86886	0.512707	1.42128	0.404253	0.328658	0.474923	1.54004	0.970878	1.49207	0.812847	1.38903	2.52472	0.925488	0.390524	1.07781	0.877752	0.950738	1.0118	0.762367	1.94467	0.928	0.578837	0.792064	1.52082	2.11526	1.23081	3.1963	0.740017	1.17807	0.50822	0.684984	0.821521	2.10084	1.1169	1.06332	0.847677	0.621947	0.964569	0.361256	2.41021
ZNF98	0.260539	0.123545	0.812334	0.302728	0.64997	0.0462749	0	0.0171448	0.0277563	0.106596	0.00586162	0	0.0201674	0.0273269	0.441055	0.0268294	0.00554988	0.409401	0.357954	0.599926	0	0.00604618	0.0285743	0.354881	0.0418855	0.0602003	0	0.0278909	0.0197625	0	0.00557277	0.0111451	0	0	0.00643267	0.0170294	0.278253	0.124761	0.00546854	0.954663	0.0130674	0.00817642	0.112039	0.0102371	0.0145368	0.0316024	0	0.0420522	0.00801607
HOXD12	0	0	0	0.0151056	0	0.0161633	0.0555136	0.642766	0.0678647	0.0200484	0	0.054486	0.0328732	0.40089	0.245088	0.262394	0.32567	0.266932	0.0807881	0.431422	0.125465	0.369576	0.78598	0	0.170685	0.147191	0.188553	0.0545551	0.0966395	0.0798171	0.163507	0	0.0188941	0	0.597665	0.222066	0.0367748	0.277312	0.320897	2.59677	0.271576	0.139941	0.16114	0.22527	0.0355429	0.880861	0.267769	0.102819	0.235194
AL162430.1	0.0394223	0.0245968	0.0644657	0.0233704	0.0217582	0.625166	1.63184	0.99444	0.577474	0.620349	0.709539	0.955363	0.610309	0.661575	0.606692	1.72532	1.04969	1.65191	0.979084	0.614066	1.3865	0.411682	0.567471	1.24299	0.765807	0.961497	0.602878	0.189908	1.42038	0.839712	0.653494	0.779948	0.847718	0.892477	1.168	0.9448	0.654296	0.557748	0.558526	0.880244	0.321301	0.927883	0.473677	1.00684	0.696532	0.980262	0.989649	0.386321	1.00065
RAB34	5.24045	3.37578	5.3591	6.06056	7.01899	50.3299	20.7908	24.335	31.0159	45.9997	10.5032	36.8307	6.89371	15.5113	5.84839	25.1515	28.4068	19.5407	3.18577	20.9873	48.3733	28.4838	11.7406	5.34852	6.73763	17.0325	33.7627	14.6013	25.9919	23.2041	34.0734	20.8081	21.3814	29.9383	9.35726	29.9473	6.97566	24.8543	2.90936	2.44863	31.4073	28.2185	22.8169	28.5882	15.8654	18.0506	25.8291	24.6122	8.10927
AC092167.1	0.0346438	0	0	0	0	0.131853	0.150952	0	0.276806	0	0	0.049386	0.0446943	0	0.0444295	0.178375	0.0737966	0	0	0.187699	0.097475	0.160792	0.047494	0	0.092825	0	0.273446	0.185432	0.131391	0.0868152	0.0370505	0	0	0	0.0427676	0.0377399	0.149997	0.678659	0.14543	0.0396691	0.0868785	1.08722	0.043817	0	0.225512	0	0.121352	0.0399405	0
XPNPEP2	0.0489963	0.0550266	0.0534144	0.0464736	0.0216339	0.696185	0.234838	0.381531	0.22184	0.0616804	0.165348	0.691474	0.486721	0.400844	0.358165	0.290114	0.574032	0.102654	0.207125	0.24555	0.117179	0.380904	0.691852	0.321331	0.157537	0.257869	0.507584	0.424852	0.353065	0.085947	0.19912	0.335348	0.123525	0.0887377	0.33267	0.394975	0.106069	0.309275	0.395933	0.151479	0.245742	0.161452	0.148727	0.288774	0.300713	0.62402	0.440509	0.254193	0.0753739
SGO1	0.022399	0.0950331	0.0195351	0.0265572	0.0247253	1.47767	0.683188	2.61876	0.608495	2.09368	1.99558	0.996235	1.0692	4.06906	1.36736	0.864965	2.55266	2.39339	0.0804856	3.36766	1.43061	0.951236	4.43414	1.65544	0.924249	2.16222	0.366854	0.129483	1.18931	1.46501	1.60978	1.05398	0.179376	3.44009	3.41772	1.90326	0.989202	0.195017	1.39632	1.91335	0.702143	0.548295	0.300297	0.440051	1.79965	1.20631	1.55352	0.537131	2.24665
SETP4	0	0	0	0.0234242	0	0.17545	0.258253	0.173345	0.105237	0.155445	0.0888967	0.0281637	0.0509763	0.0207219	0.126685	0.305169	0.126253	0	0.167037	0.0535201	0.0833815	0.137544	0.162508	0.124586	0.0794039	0.101444	0.0974625	0.0422991	0.149858	0.123772	0.147903	0.105641	0.087897	0.143125	0.0487786	0.172178	0	0	0.103669	0.158357	0.0247724	0.0310007	0.0499756	0.0388137	0.0918601	0.167747	0.0692044	0.136663	0
AL137792.1	0.0307876	0.0384187	0.0335638	0.0365031	0.033985	0.117177	0.536598	0.236365	0.327992	0.19379	0.277064	0.131666	0	0.0322919	0.157936	0.23778	0.0655822	0	0.162688	0	0.0433125	0.107171	0.0422074	0.349466	0.0412463	0.0790421	0.0303761	0.263667	0.233531	0.270031	0.0987791	0.197551	0.22829	0.223039	0.0380071	0.268313	0.088867	0.067013	0.064621	0.176268	0.038604	0.289859	0.0389397	0.483883	0.14315	0.112032	0.251637	0.106484	0.0473624
UBE2SP2	0.138018	0.12917	0	0.0409099	0.114264	1.22568	0.451034	2.34626	0.918972	0.70585	1.51375	2.16424	0.40063	2.46094	0.575259	0.710629	1.72724	3.25313	0.474055	1.86943	3.68914	0.84076	1.32448	1.21848	1.06319	2.65753	1.12343	0.184686	1.43948	1.38345	1.43915	1.4391	0.409361	1.37481	2.72611	2.5184	0.995954	0.600825	1.44845	0.8297	1.73058	0.324852	1.1783	0.677874	2.18187	1.04631	1.89354	0.596696	3.07865
AC104651.1	0	0.0291146	0.0254354	0	0	0.236798	0.60997	0.358245	0.37284	0.293716	0.314948	0.23282	0.0602005	0.171301	0.239375	0.780846	0.124249	0.611039	0.0986311	0.0316024	0.196939	0.189505	0.159929	0.294259	0.218802	0.26955	0.138118	0.224789	0.442438	0.175402	0.149714	0.17466	0.173004	0	0.172816	0.254167	0.101018	0.25392	0.0979426	0.106864	0.17553	0.366104	0.147547	0.504209	0.282054	0.169801	0.272424	0.0806961	0.0717847
PDE6G	0.140829	0.135181	0.0708593	0.0642205	0.0717485	0.329842	1.60488	0.166336	0.95212	0.27275	0.658049	0.586829	0.545056	0.374957	0.736328	0.585663	0.242298	0.28371	0.28622	0.557583	0.289562	0.263966	0.430686	0.396218	1.36423	0.778737	0.470282	0.88136	0.780625	0.705819	0.278054	0.544503	0.562289	0.215818	0.240719	1.16832	0.265787	1.39119	0.363805	0.310111	0.978001	0.917919	1.32904	0.361804	0.362659	0.473041	0.480656	0.711889	0.349967
ACTBP11	0.0913785	0.0380093	0.0996183	0.0722281	0.0168114	0.946744	2.9862	2.00439	2.47429	0.766897	1.85025	1.51974	1.21818	0.974406	1.1719	2.70533	1.80051	1.51566	1.38421	0.907656	1.41408	0.830555	1.23185	1.21009	0.775328	0.918847	1.86325	1.66296	2.42594	1.77466	1.54733	1.35183	1.62617	1.02056	2.19972	1.90795	1.60454	0.696138	1.11882	1.06377	1.0503	0.860311	0.789757	1.67554	2.15269	1.58868	2.00943	1.26419	1.12458
ZNF433-AS1	0.148486	0.0908286	0.152354	0.138079	0.163907	0.993601	0.888029	0.472592	1.00031	1.37446	0.530573	0.589362	0.255418	1.03217	0.399526	0.479705	0.555072	0.747251	0.744632	0.587595	0.65535	1.19591	0.985883	0.892294	0.510971	1.03526	0.430887	0.489334	0.640446	0.426817	0.644547	0.694341	0.431775	1.10207	0.628988	0.941993	0.352963	0.671745	0.684434	0.56675	0.960125	0.708121	0.707023	0.520513	0.370921	0.512071	0.482731	0.493424	0.846517
RN7SL665P	0.0571623	0	0.0623168	0	0.0630988	0.0725193	0.498142	0.0626929	0	0.449753	0	0.488921	0	0.359731	0.0733086	0.294319	0	11.0781	0.181235	0	0.321667	0.132653	0.31346	0.0720935	0.229742	0.440265	0.0563983	0.122385	0.433589	0.358113	0.122267	0.0611311	0	0.207055	0.0705665	0	0.0824982	0	0.11998	0	0.286699	0	0.433788	0.336903	0.159469	0	0	0	1.9346
AC013489.3	0.132679	0.0413911	0.0723213	0.0393273	0.0732288	0.420808	0.144529	0.254652	0.176684	0.36537	0.335813	0.472845	0.0427924	0.591435	0.212694	0.170785	0.317953	0.521215	0.455716	0.22464	0.373308	0.307899	0.45473	0.251002	0.3555	0.255473	0.294536	0.106525	0.1258	0.249363	0.46116	0.425671	0	0.240296	0.204738	0.18067	0.143614	0.216593	0.208862	0.0759622	0.748634	0.312286	0.293667	0.13033	0.215916	0.2414	0.426024	0.764818	0.255134
KCNE3	0.718221	0.349185	0.528769	0.420247	0.653812	2.36077	13.8794	4.46029	8.26013	1.51916	4.35966	3.38402	2.16002	0.567431	2.66758	5.29486	1.59946	2.85811	0.892126	4.53563	1.39095	3.17112	4.23261	4.58795	1.17464	2.62219	3.5109	9.10152	4.89955	1.43167	6.86815	3.83046	4.98671	0.608156	3.02263	3.65293	4.84624	3.31947	2.13888	2.48323	4.43849	4.84457	2.44795	0.925407	2.62385	1.20493	4.74304	5.01119	2.31021
IGHG4	0.107275	0	0.116948	0.0908499	0.118416	0.311075	9.34851	0.0168078	3.51016	3.78613	0.0172391	0.218464	0.21748	0.12859	3.59664	1.02578	0.114256	0.401352	0.0809807	1.16243	0.043119	0.213383	0.273122	0.173952	0.41062	4.42625	0.453605	1.01714	0.116244	0.480044	0.0491689	0.147501	0.386359	0.444085	0.113512	0.133557	0.243292	50.7357	0.289495	0.245672	0.922356	0.456893	0.310126	0.180645	0.769556	1.56144	2.11146	0.194349	0.353631
AL136126.1	0.127975	0.585551	0.279031	0.252888	0.423798	0.757664	4.08922	2.05857	4.88541	2.55084	2.25537	0.851356	1.04565	2.10291	1.80536	2.41605	0.726951	1.34064	2.164	1.27117	1.56033	0.890954	1.11115	2.04444	1.71449	2.02609	1.59935	0.639326	2.58859	2.19144	0.593084	1.00364	1.5183	1.39067	1.26388	2.92766	0.923487	1.94988	1.11921	2.24693	0.855818	2.61054	0.917214	1.50852	1.38841	1.29357	0.597705	0.590165	1.83747
HKDC1	0.406673	0.140685	0.149244	0.253019	0.35557	1.47627	0.245621	0.786054	0.621984	0.792005	4.51578	0.539547	4.99718	0.89954	1.19284	1.14024	0.28304	0.674883	0.463832	0.681725	0.957298	3.64415	0.850074	0.218362	0.706649	0.397985	2.19687	1.08621	2.68766	1.7708	0.38325	0.232525	3.03339	2.02728	0.23362	0.636014	0.836798	0.473261	2.12549	0.313516	1.64588	0.315903	0.641668	0.324326	8.30108	0.380947	0.314992	0.622036	0.40262
AC079316.1	0	0	0	0	0.0460576	0.158801	0.181804	0.0457613	0.222253	0.26263	0.0469357	0.0594795	0.107658	0.218815	0.10702	0.107416	0.0888791	2.84111	0.0881921	0.11303	0.176095	0.145241	0	0	0.111797	0.160681	0.164666	0.0446662	0.474733	0.0522792	0	0.0446212	0	0	0	0.227266	0.120435	0.272454	0.0437882	0.334437	0.104635	0.0654711	0.158317	0.0819716	0	0.0506099	0.0487181	0.144311	0.320935
AC092747.1	0	0	0.0303984	0	0	0.141501	0	0	0.594119	0.175513	0.0627336	0.0397497	0.251814	0.0292465	0.0357603	0	0.0890958	0	0.0589381	0.151075	0.235366	0.0970633	0	0.105503	0.261495	0.0357939	0.110045	0	0	0.139751	0.0596423	0.0894601	0.0413521	0	0	0.334137	0.160972	0.364158	0.26337	0.0319288	0.489486	0.131262	0.634812	0.273905	0.0259299	0.0338222	0.0976738	0.0321472	0.0428957
UBL5P2	0.704741	0.195427	0.597558	1.11409	0.950804	2.3842	5.80028	4.80932	10.6362	6.7771	3.08297	5.80455	3.53575	2.54604	1.60676	4.83812	4.17001	3.69134	3.88951	2.86369	10.6855	2.27146	1.82494	2.3702	2.83243	4.02068	3.70838	1.92799	7.12749	4.12075	2.00986	2.42849	2.43864	4.25455	3.86666	8.18905	2.59926	4.94274	4.27325	3.22787	5.59652	4.66907	2.37692	4.61511	1.74761	1.99459	3.65719	1.80553	6.02303
C3orf80	9.17968	1.43602	9.275	5.64696	8.51761	0.396634	0.695621	0.189684	0.301179	0.366362	0.778208	0.161204	1.16711	0.509317	0.528914	0.667868	0.474682	1.0801	0.576464	0.441489	0.177803	0.216115	0.264459	0.31041	0.43667	1.05028	0.439723	0.29908	0.327967	1.10851	0.213421	0.341461	0.443917	1.71073	0.361318	0.231885	0.643217	1.08591	0.446783	0.14472	0.4504	0.396636	1.05166	0.470462	0.624763	0.371152	0.60582	1.19636	0.317225
SYNGR1	104.249	30.4692	97.9735	97.9911	84.1121	8.50457	3.49265	8.08796	2.95596	4.76986	4.45573	5.80124	3.50644	11.2271	4.66548	4.1716	11.8551	8.38414	13.4864	4.47985	4.61821	6.94555	8.3482	9.66465	9.53927	7.69972	7.78447	5.2515	8.67116	5.11133	7.77333	6.01112	6.57643	9.80033	8.52521	3.53313	12.2128	8.36928	9.82288	7.96689	6.94275	3.30117	19.5464	6.42021	4.65357	9.36674	6.88268	7.07736	15.3854
AL031727.1	0.301516	0.423281	0.246528	0.446862	0.291225	3.68175	25.1261	4.00959	14.3544	8.42175	2.7134	4.29821	2.13943	7.11557	3.19013	8.92659	6.34245	7.50167	4.58066	12.5072	13.5206	2.27406	4.59857	4.75342	2.42365	8.70853	4.35072	2.82428	14.0083	5.43072	2.94246	5.52195	3.52129	7.09902	3.86177	15.8483	3.59003	12.4694	8.86004	8.02712	3.96968	10.2903	5.19592	8.66323	6.23857	4.9373	4.40069	4.56243	21.9744
HAS3	0.259387	0.376277	0.190874	0.234499	0.340011	0.658145	1.03132	0.433837	0.509492	0.418375	1.20726	0.513048	0.94535	0.836585	1.15182	1.22702	0.372959	1.68131	0.524275	0.939825	0.150525	0.571846	0.528953	1.12045	0.577721	0.76166	4.41141	1.28425	1.5986	10.7738	0.662307	1.06797	2.5821	0.728156	0.348229	0.194265	0.641081	0.0988027	1.04123	0.400967	0.613891	0.900515	0.172236	0.910894	2.35179	1.522	0.969167	4.21652	0.478836
[truncated: 5,061 more rows]
[truncated: 125 more columns]

## Sheet: Table S2
Table S2: The impact of chemotherapy on proteins expression in the CPTAC database.
[truncated: 3,813 more rows]
[truncated: 61 more columns]

## Sheet: Table S3
Table S3: Differential proteins in the CPTAC database.
[truncated: 1,416 more rows]
[truncated: 143 more columns]
